# Supplementary material for: Ultrasound-promoted sterically congested Passerini reactions under solvent-free conditions
Source: Royal Society of Chemistry journal article supplement (doi:10.1039/c2gc36095k), 2012-01-01

CC-CH30-kailian  
PROTON

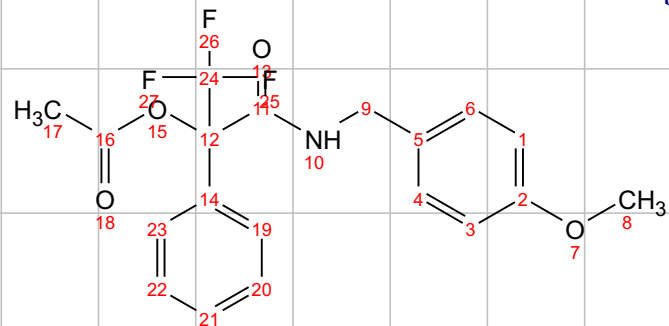

7.55  
7.53  
7.41  
7.40  
7.26  
7.18  
7.16  
6.86  
6.84  
6.33  
4.52  
4.50  
4.48  
4.46  
4.45  
4.44  
4.41  
3.79  
1.57  
0.00

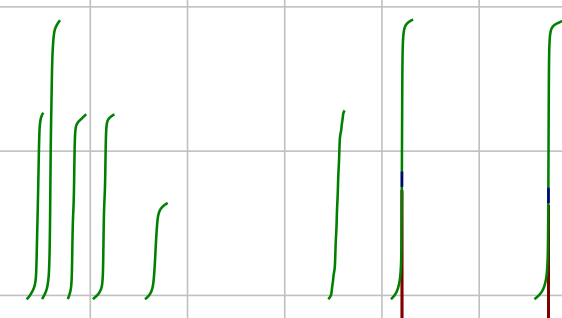

2.01  
3.00  
1.99  
1.99  
1.04  
2.03  
3.01  
3.00

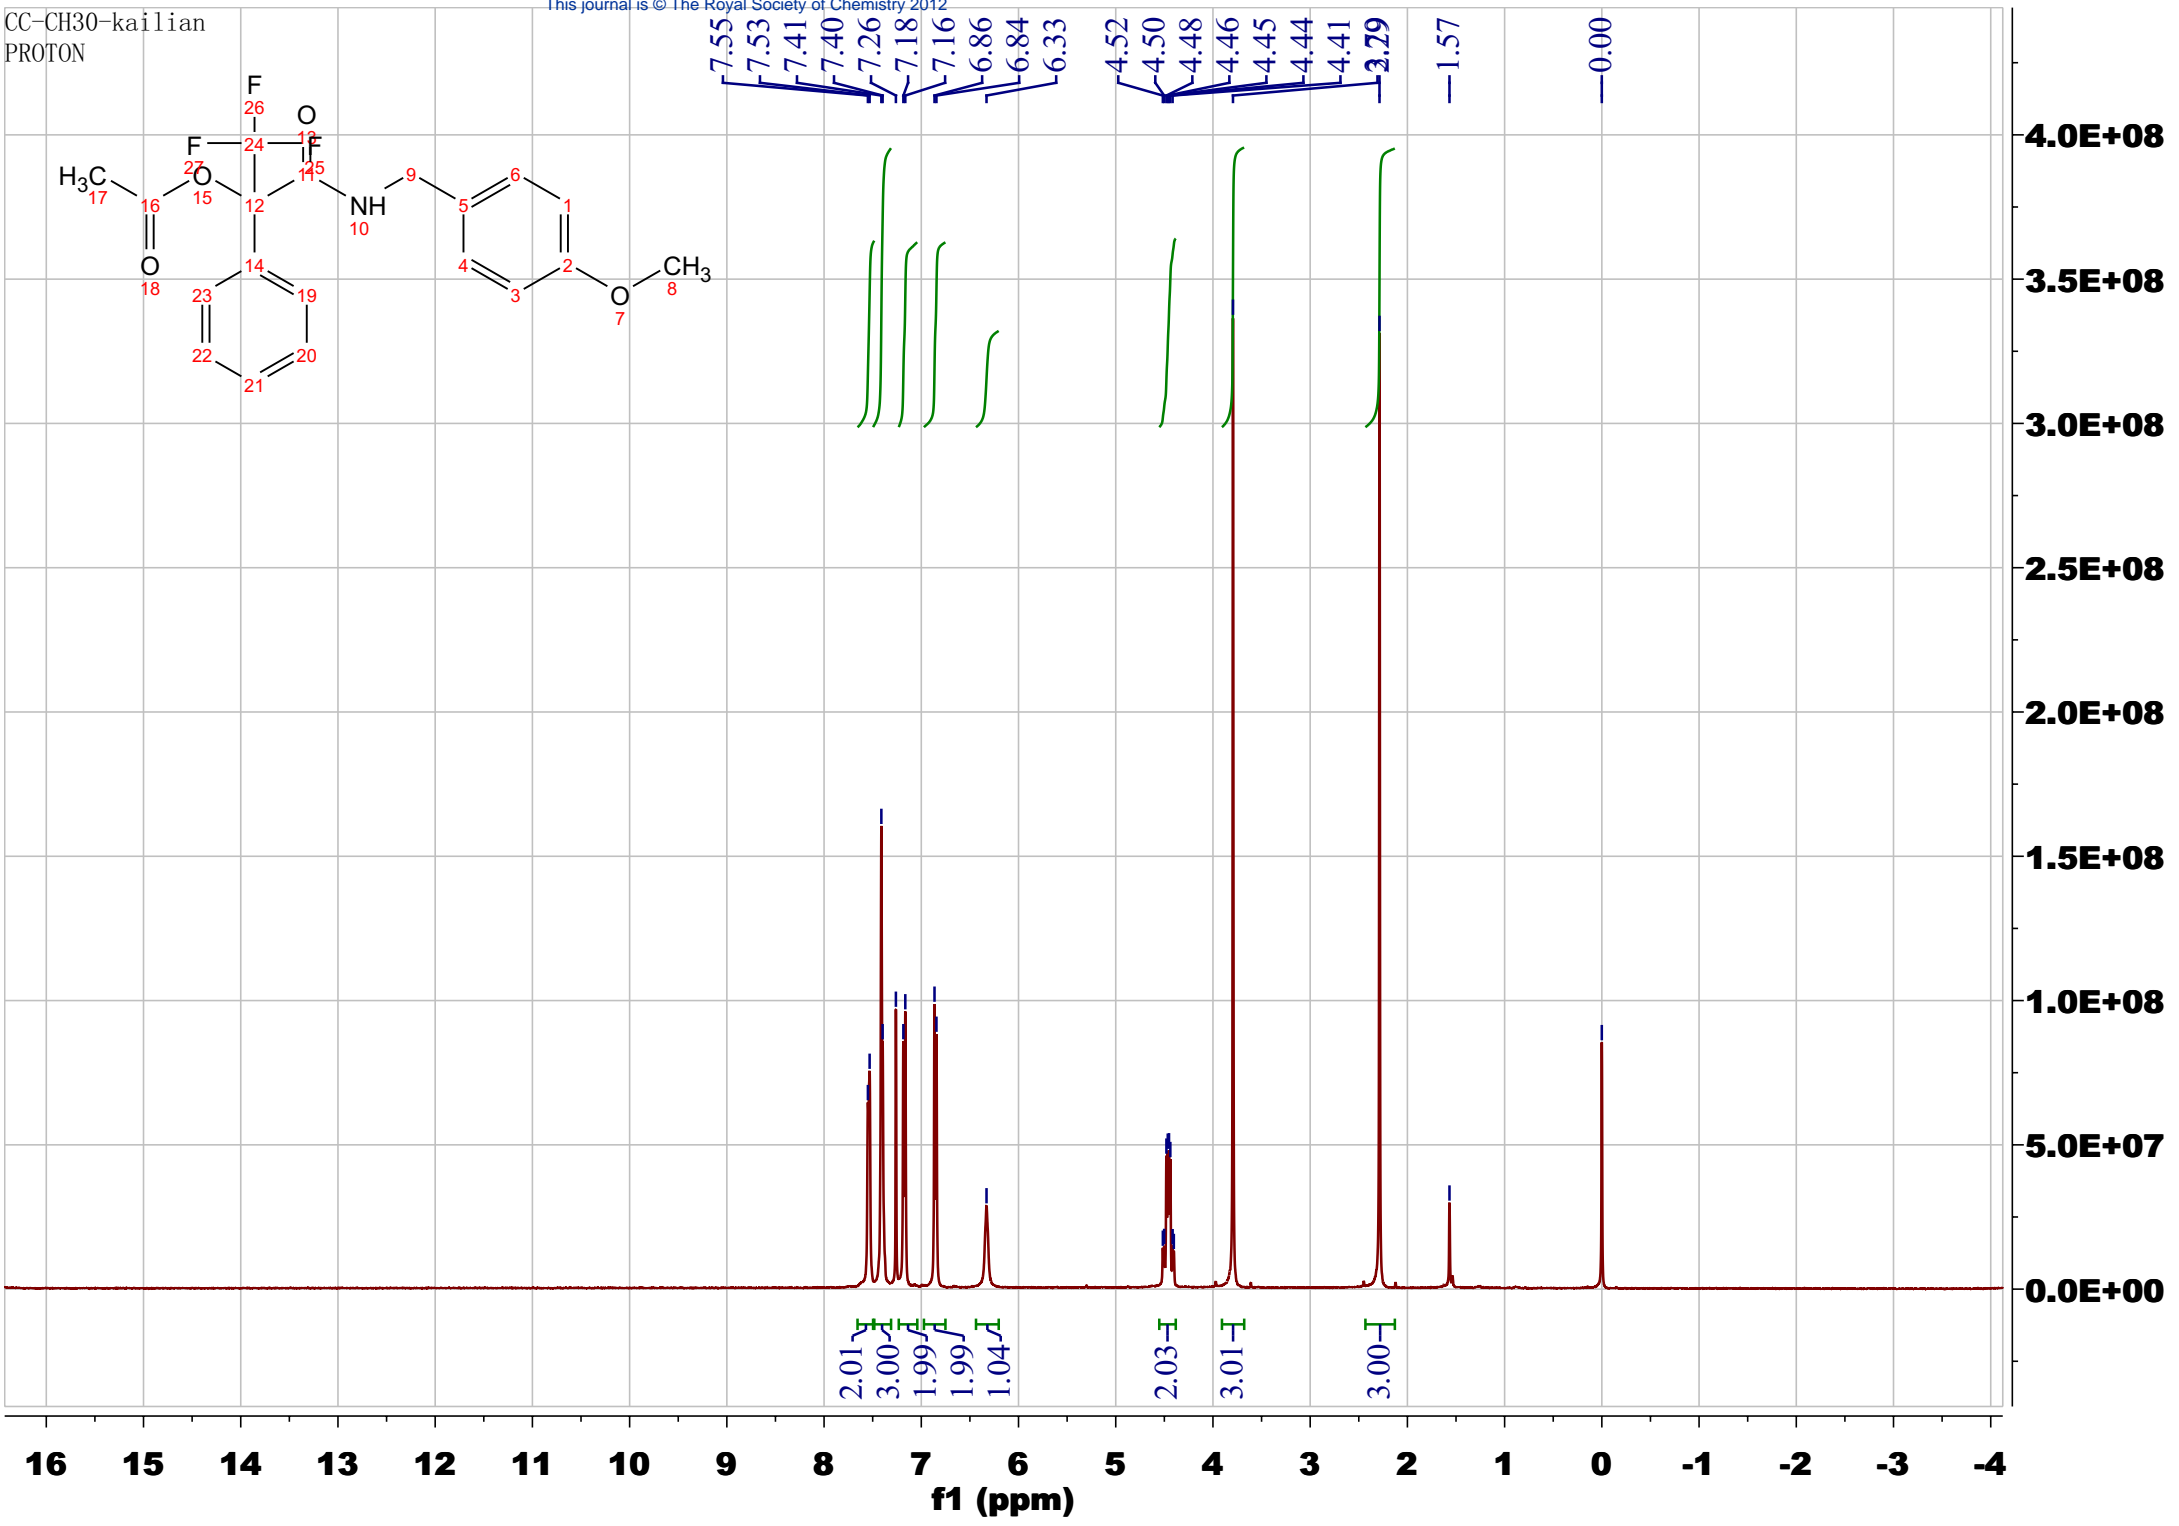

CC-CH30-kailian  
F19CPD

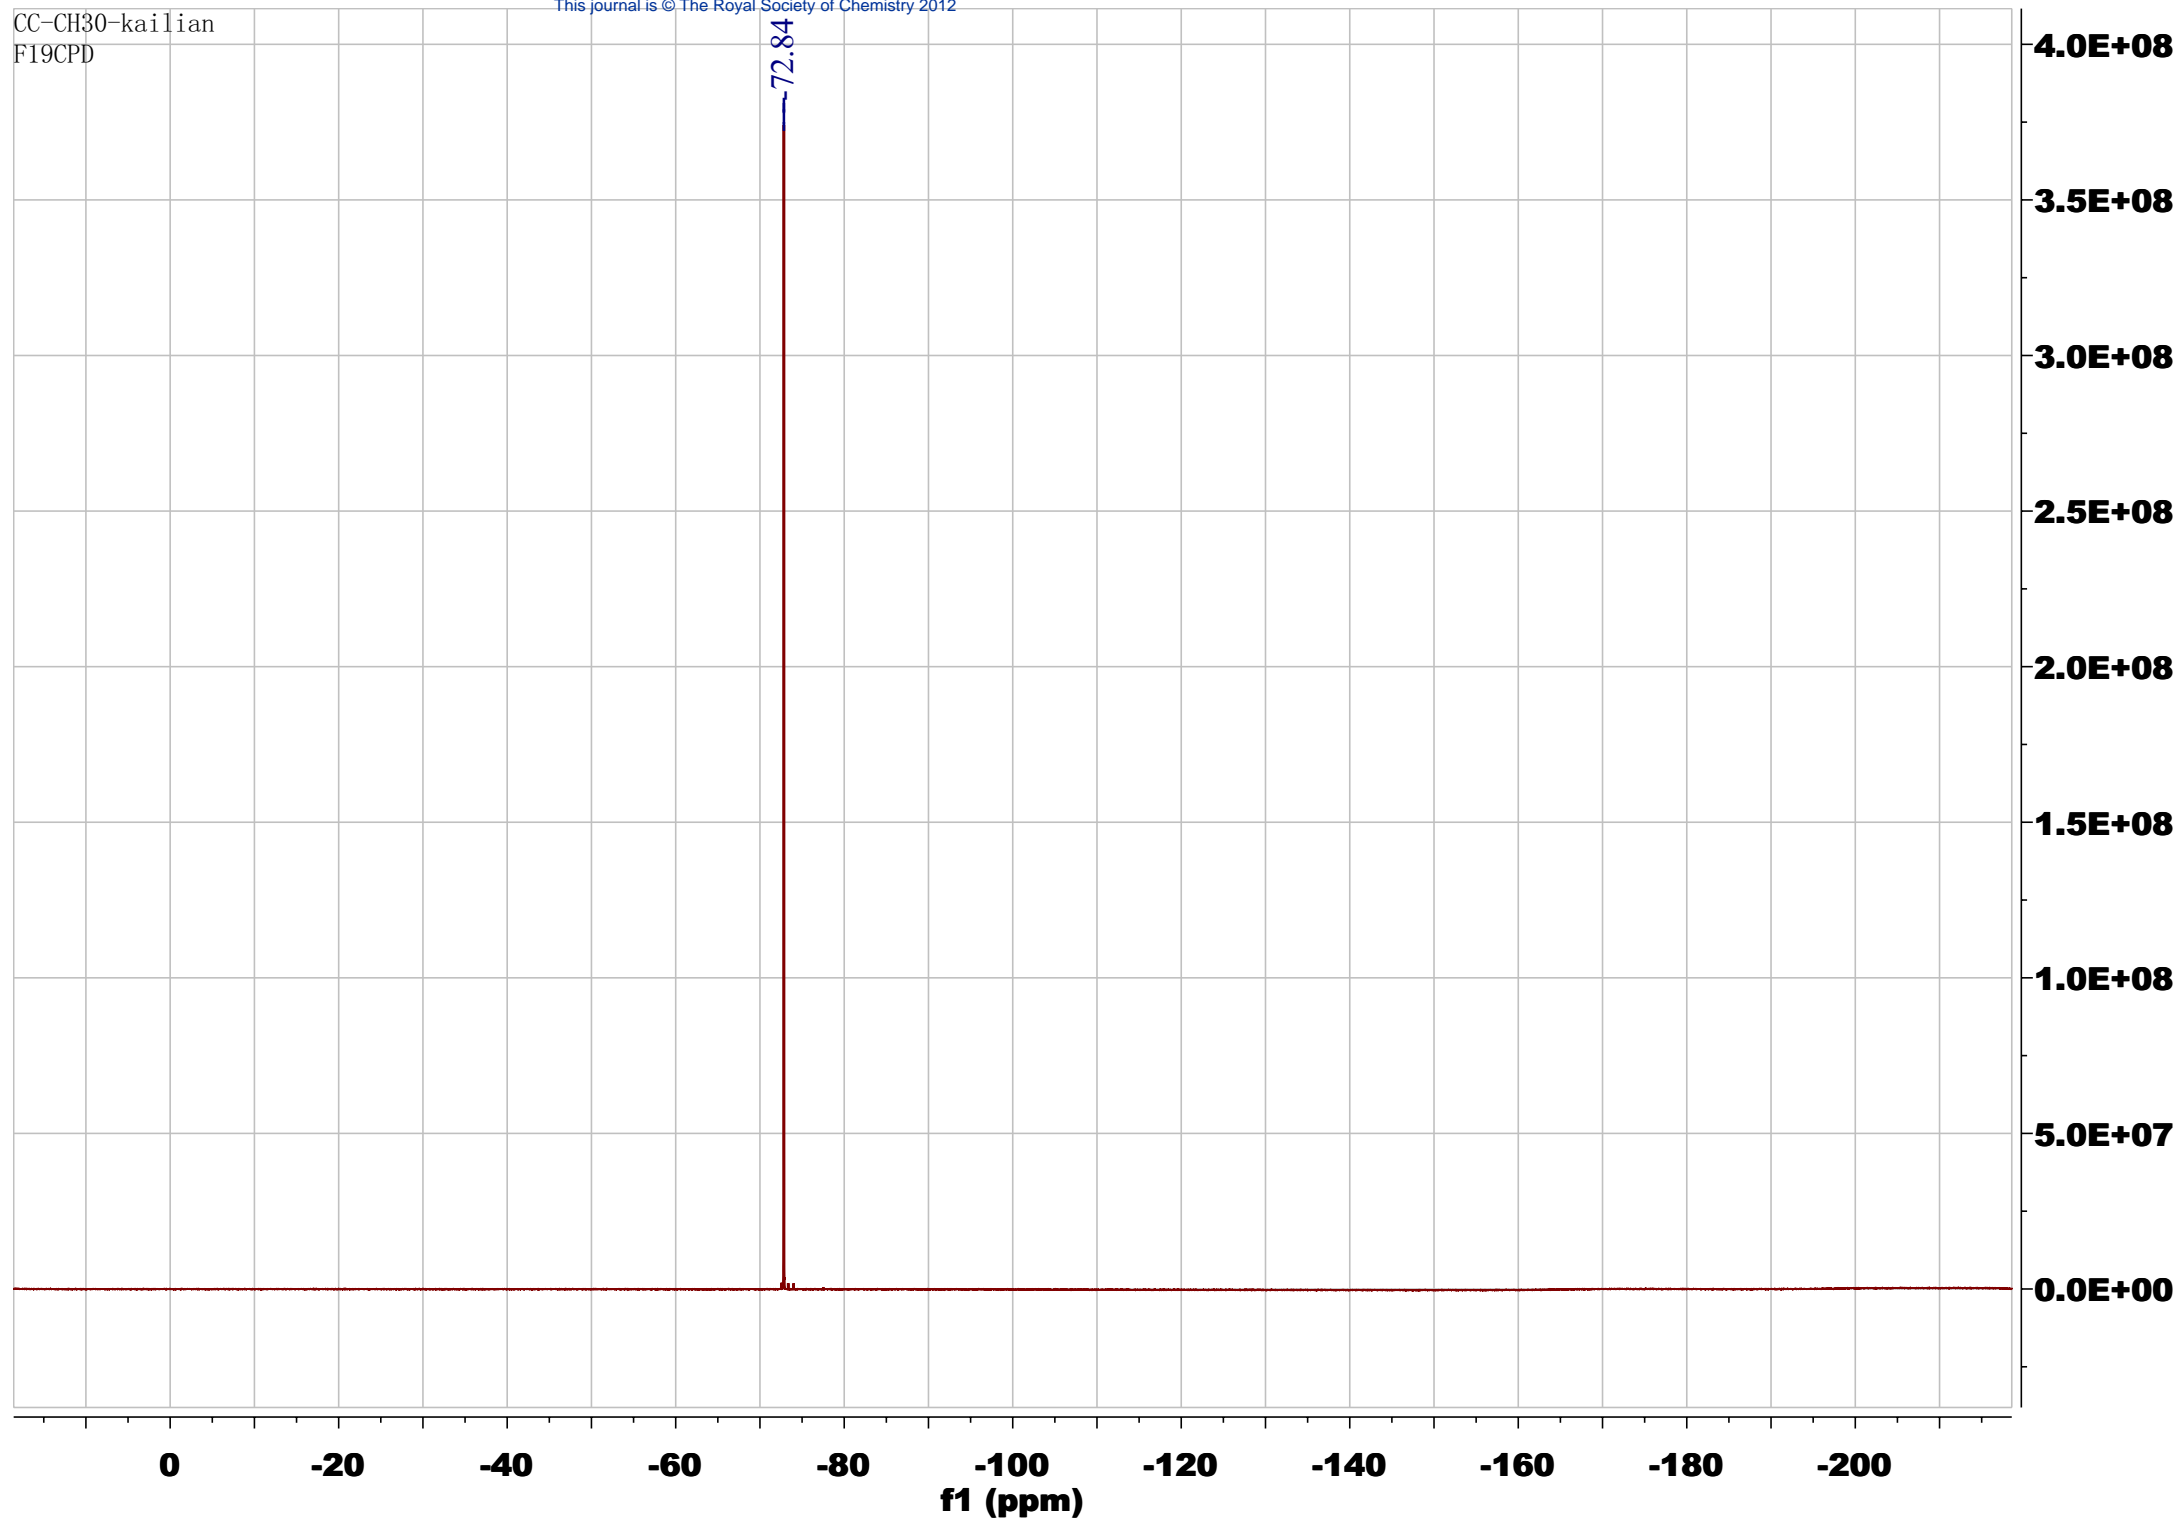

CC-CH30-kailian  
C13CPD

Electronic Supplementary Material (ESI) for Green Chemistry  
This journal is © The Royal Society of Chemistry 2012

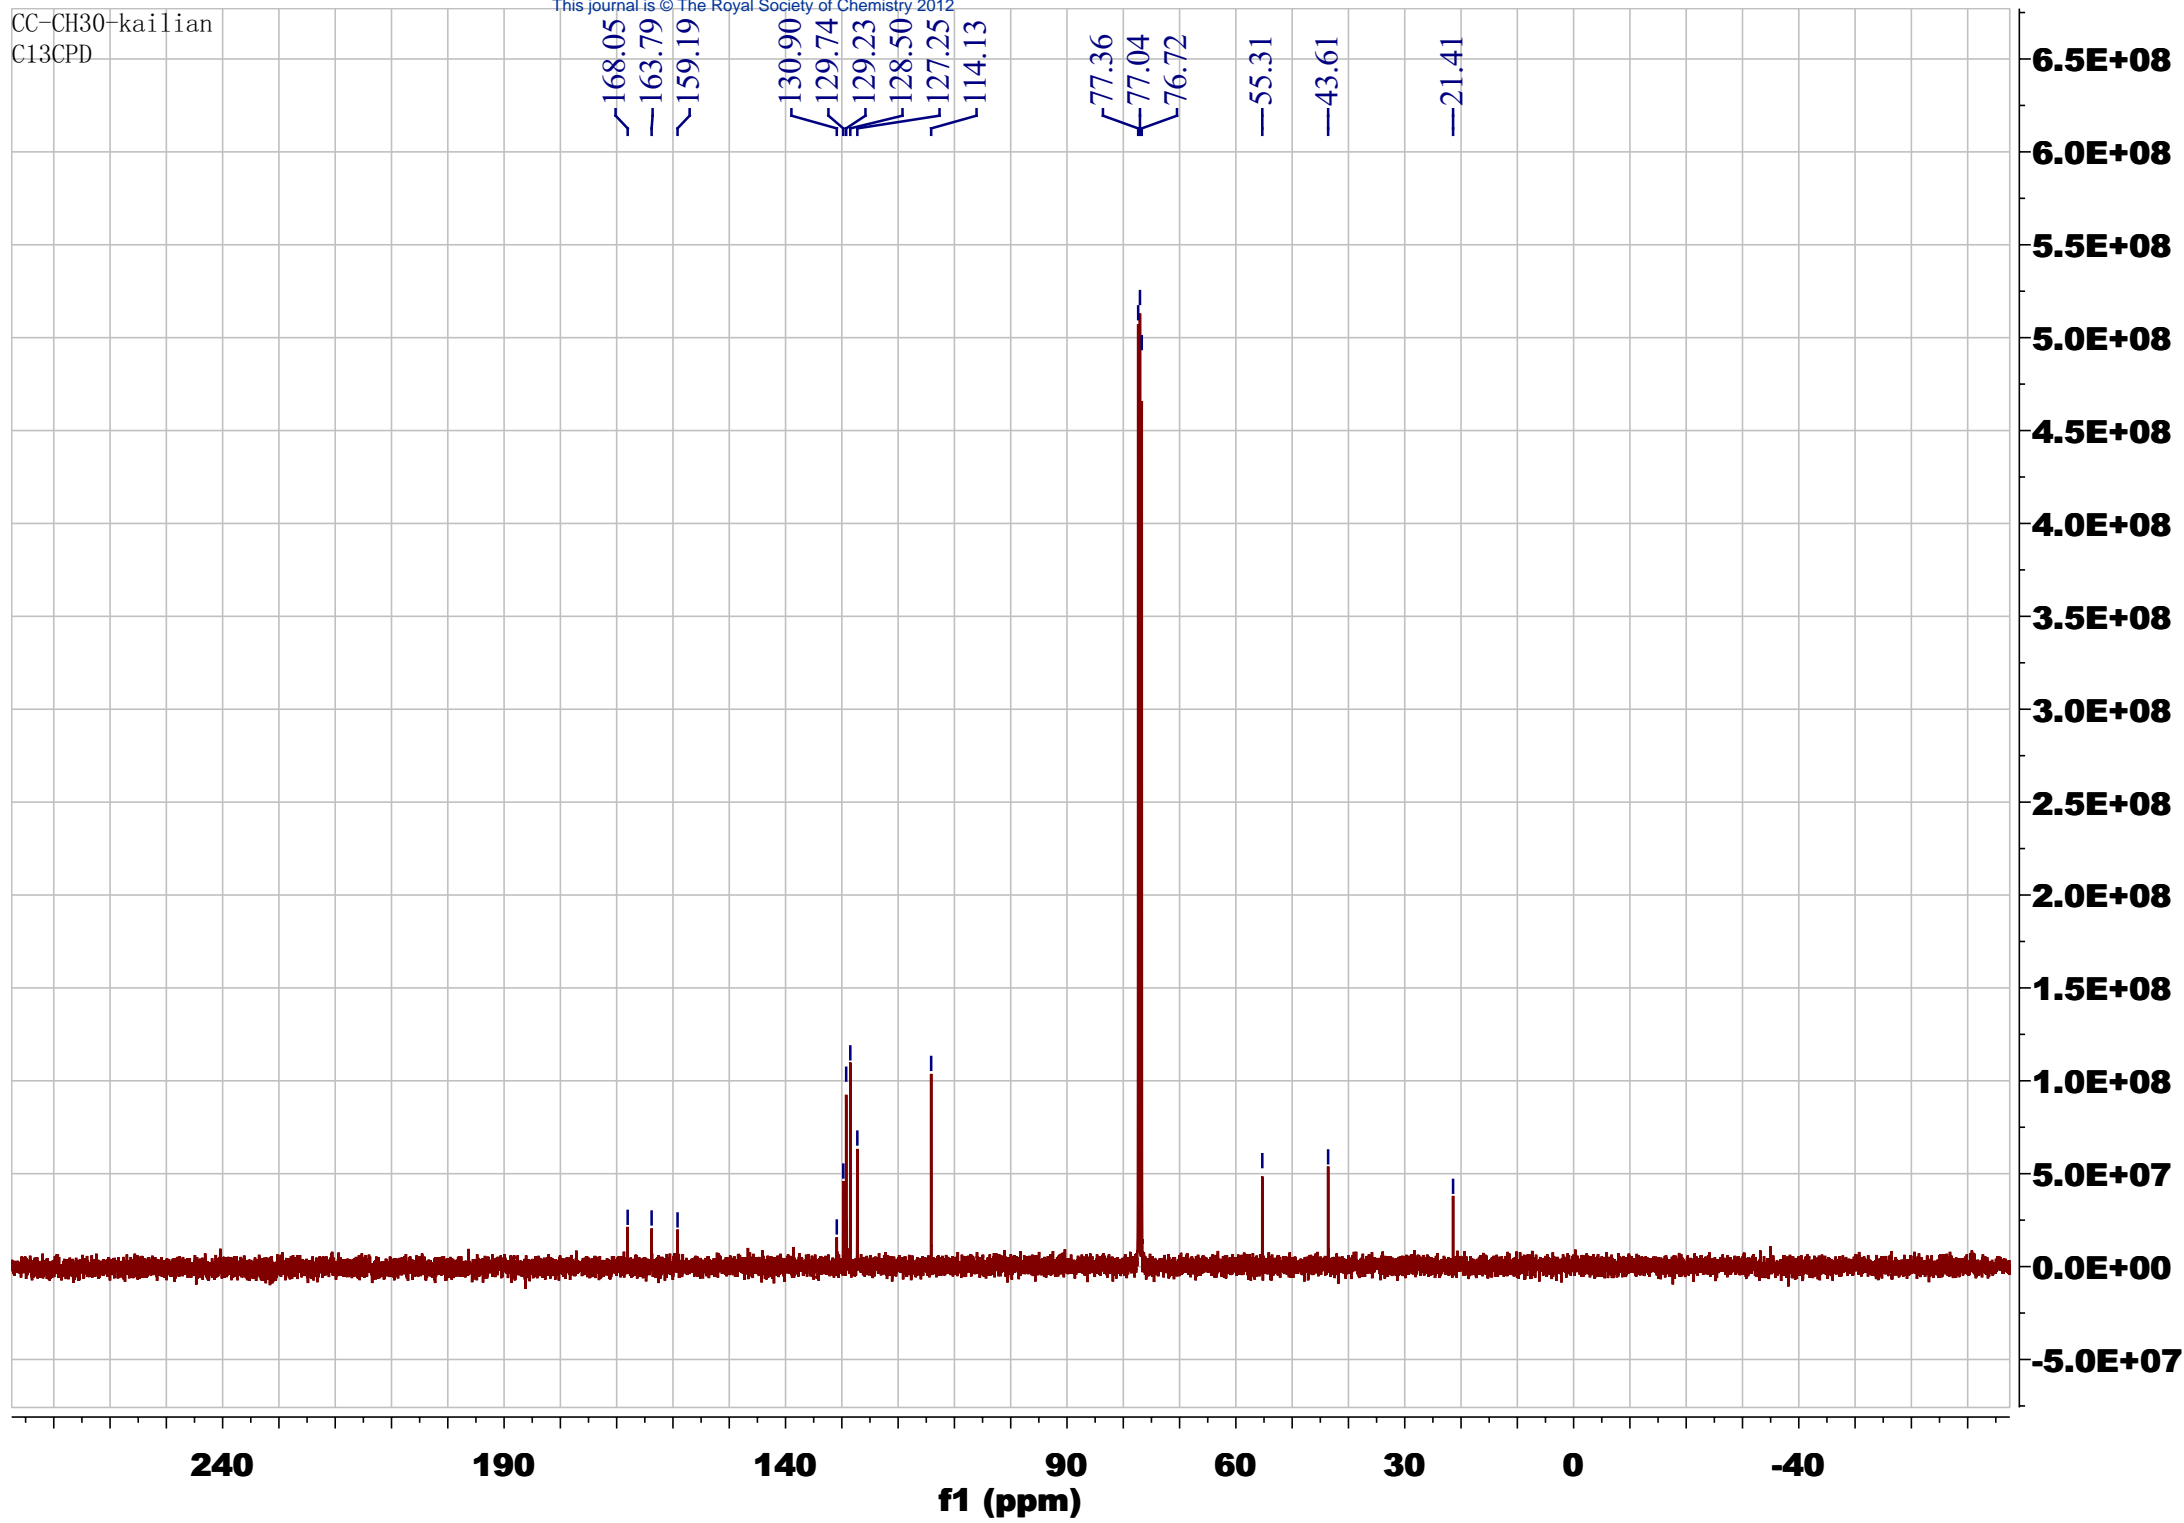

382.1261

|                      |                  |                    |           |                        |                      |                               |                       |
|----------------------|------------------|--------------------|-----------|------------------------|----------------------|-------------------------------|-----------------------|
| <b>Sample Name</b>   | lc/ms            | <b>Position</b>    | Vial 5    | <b>Instrument Name</b> | Agilent_G6520_QTOF_L | <b>User Name</b>              | Agilent FSE           |
| <b>Inj Vol</b>       | 1                | <b>InjPosition</b> |           | <b>SampleType</b>      | Sample               | <b>IRM Calibration Status</b> | Some Ions Missed      |
| <b>Data Filename</b> | CC-4-21-B.d (4d) | <b>ACQ Method</b>  | chen-ms.m | <b>Comment</b>         |                      | <b>Acquired Time</b>          | 4/19/2012 12:21:15 PM |

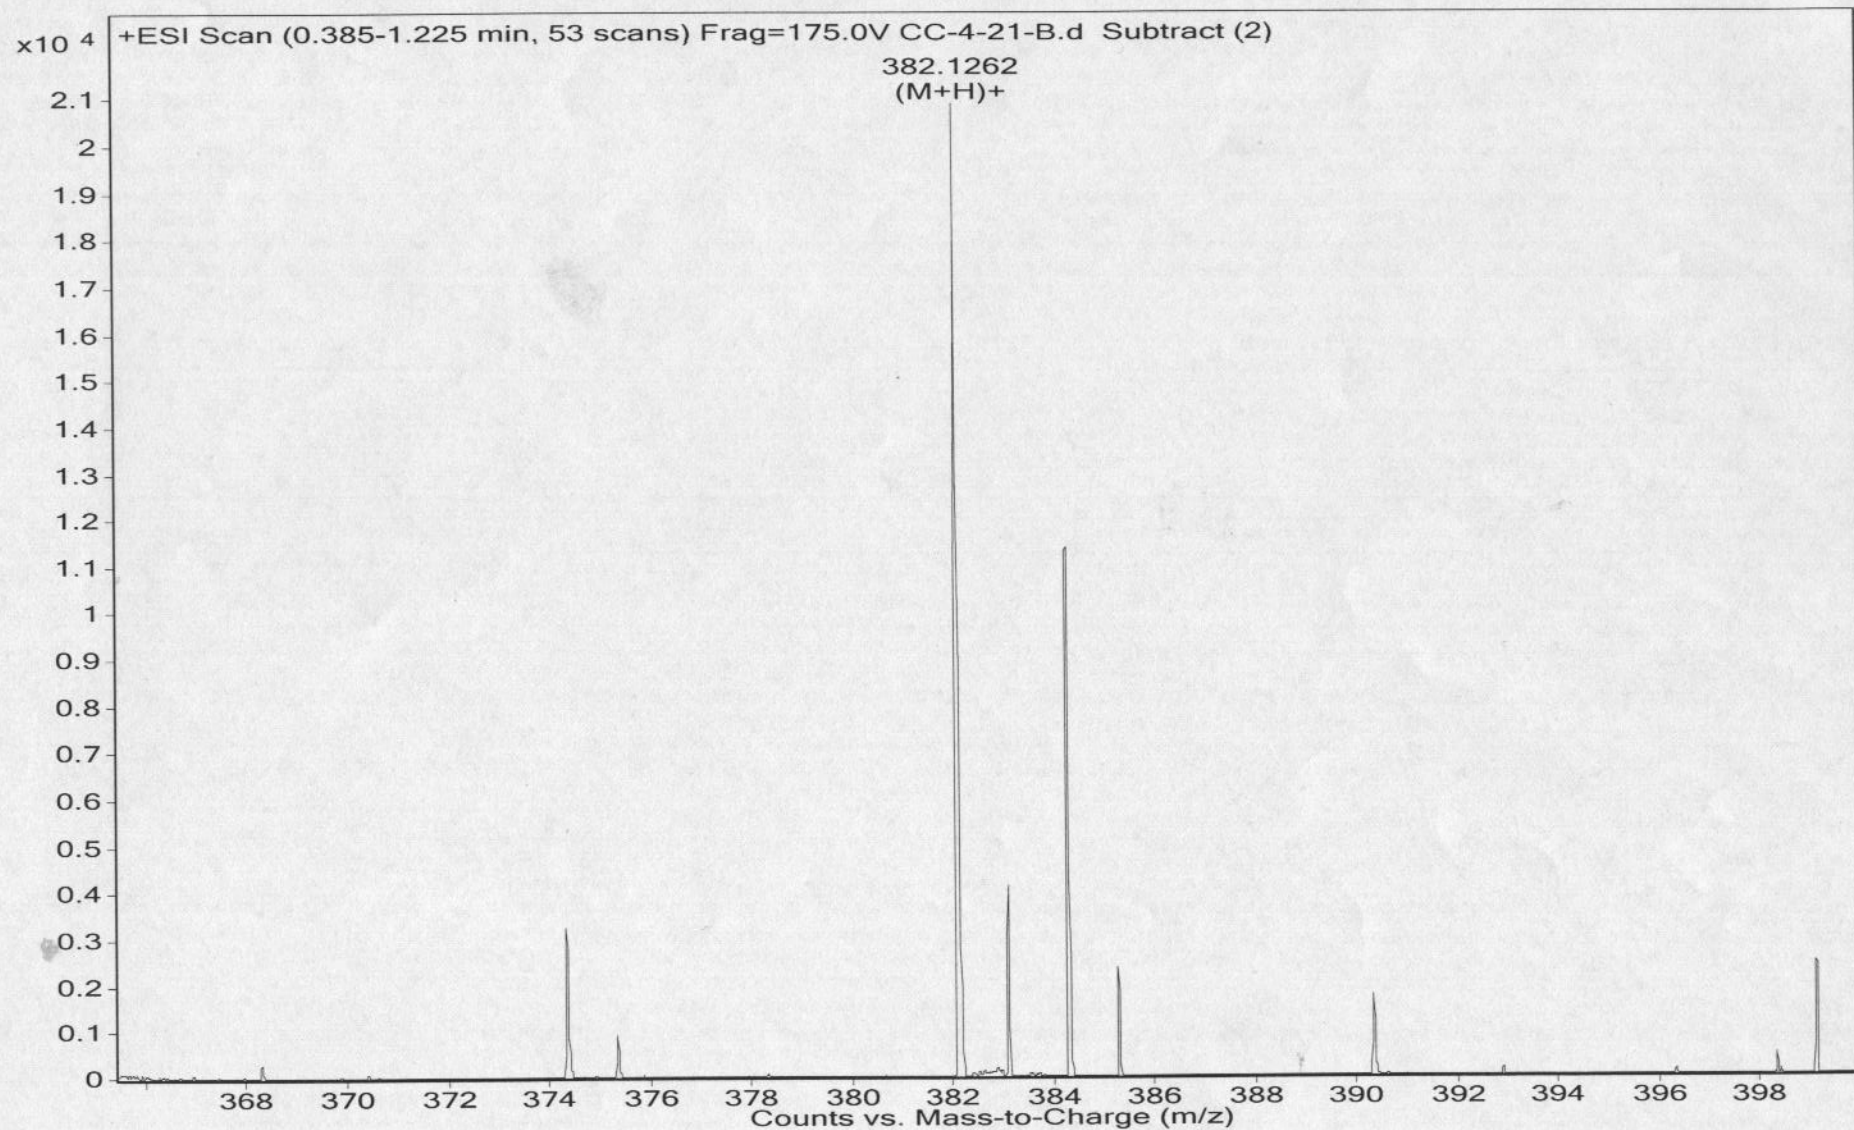

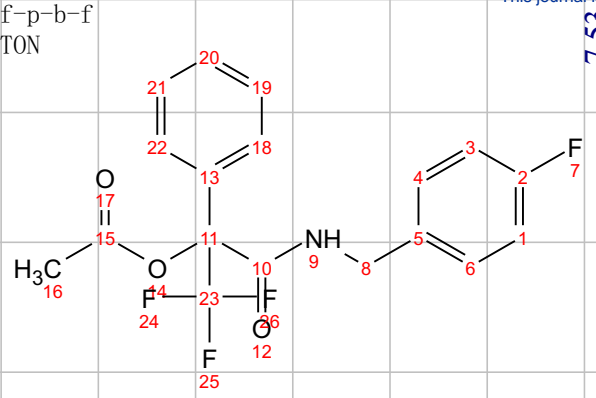

7.53  
7.52  
7.42  
7.40  
7.26  
7.24  
7.22  
7.20  
7.03  
7.01  
6.99  
6.42  
4.55  
4.53  
4.51  
4.49  
4.48  
4.46  
4.44  
2.29  
1.62  
1.56  
1.53

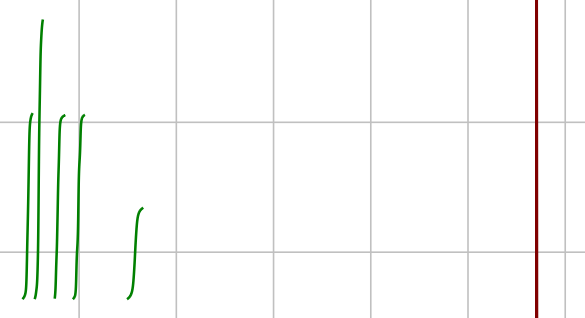

2.03  
3.06  
2.01  
2.01  
1.00

4.5E+08  
4.0E+08  
3.5E+08  
3.0E+08  
2.5E+08  
2.0E+08  
1.5E+08  
1.0E+08  
5.0E+07  
0.0E+00

16 15 14 13 12 11 10 9 8 7 6 5 4 3 2 1 0 -1 -2 -3 -4  
f1 (ppm)

cc-f-p-b-f  
F19CPD

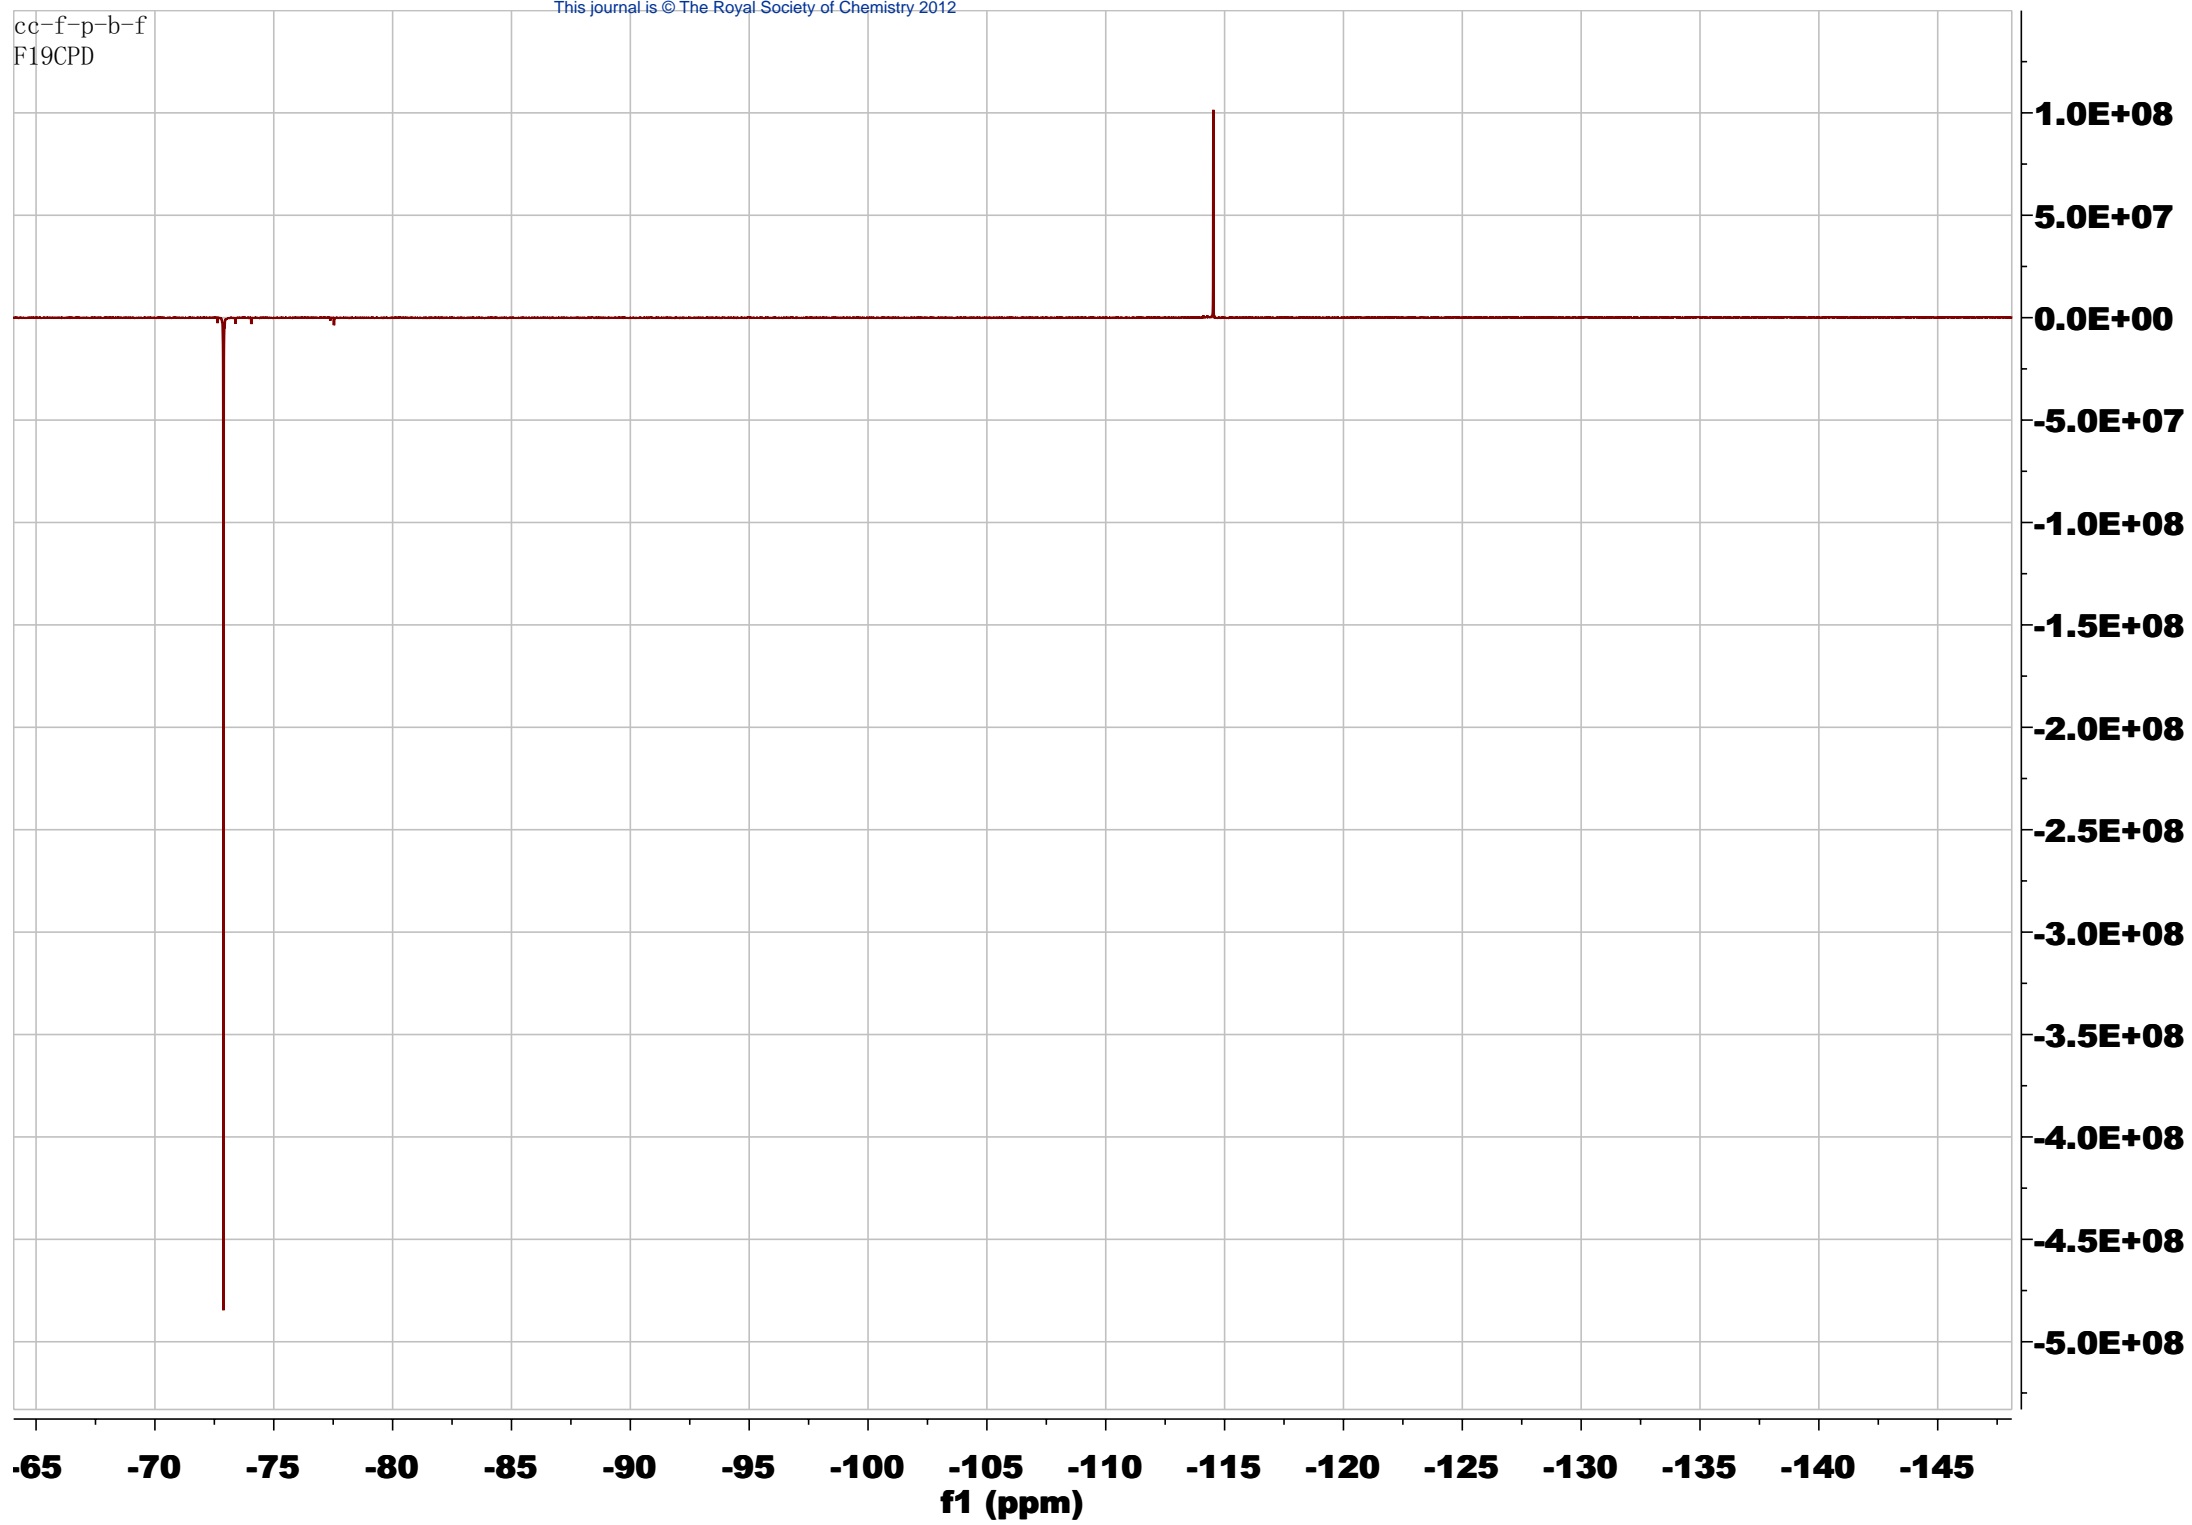

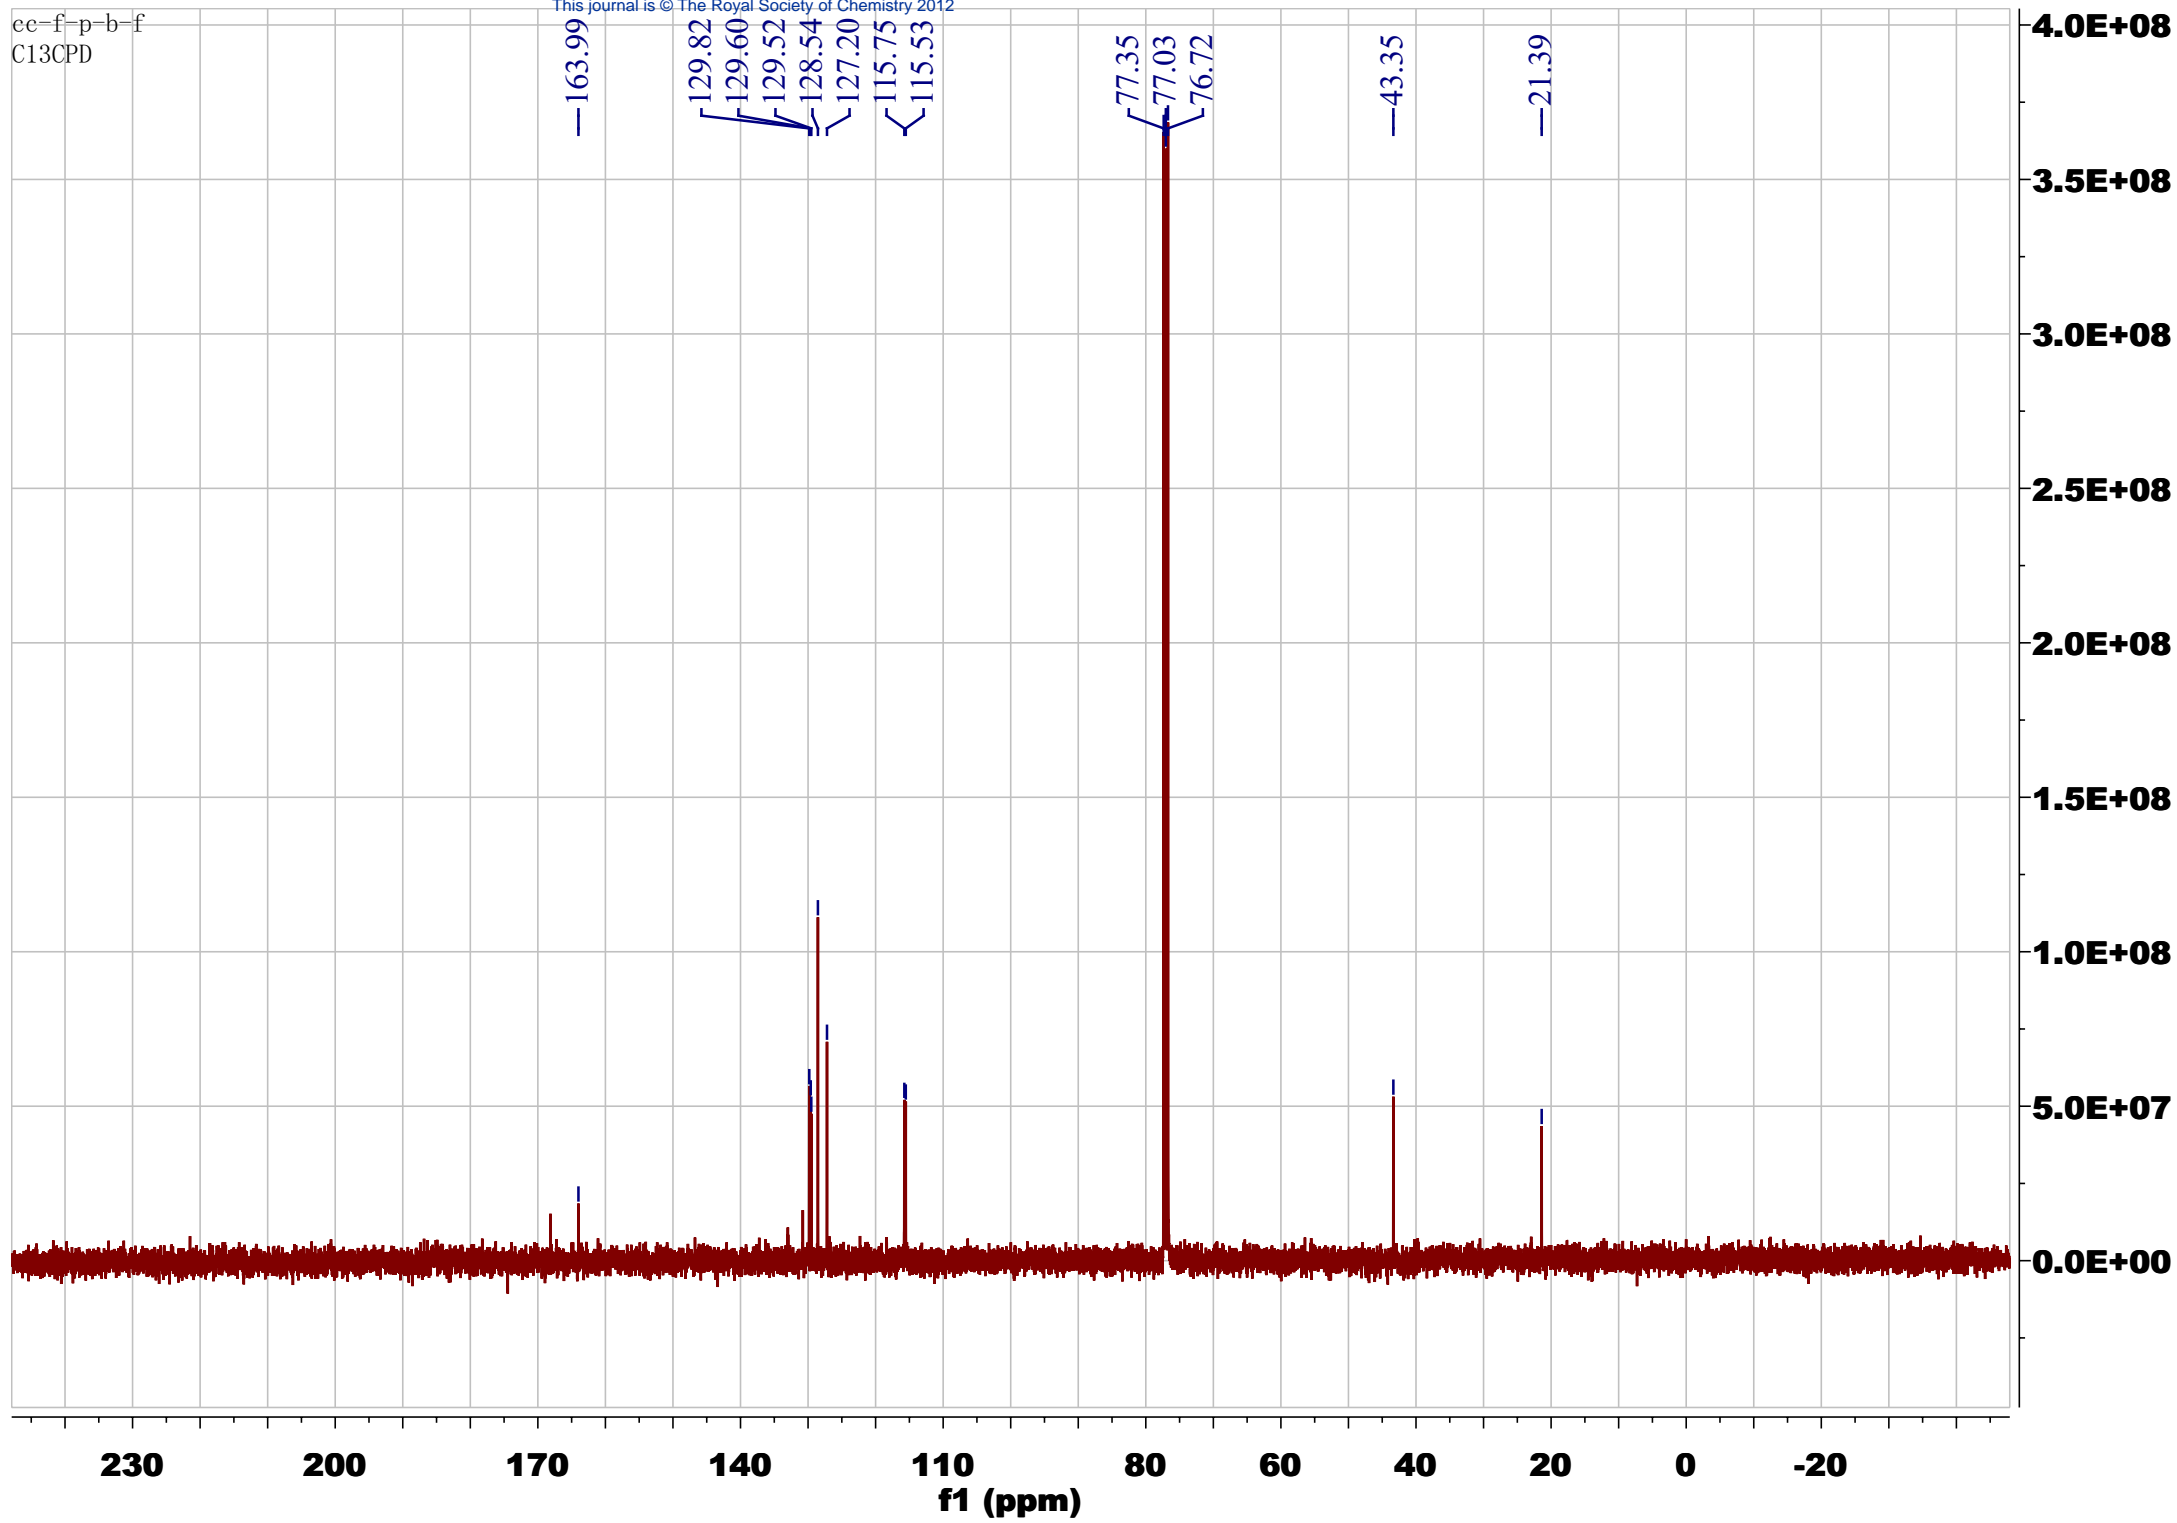

4e

370.1064

|               |             |             |           |                 |                      |                        |                       |
|---------------|-------------|-------------|-----------|-----------------|----------------------|------------------------|-----------------------|
| Sample Name   | lc/ms       | Position    | Vial 2    | Instrument Name | Agilent_G6520_QTOF_L | User Name              | Agilent FSE           |
| Inj Vol       | 1           | InjPosition |           | SampleType      | Sample               | IRM Calibration Status | Some Ions Missed      |
| Data Filename | CC-5-50-A.d | ACQ Method  | chen-ms.m | Comment         |                      | Acquired Time          | 4/19/2012 12:37:01 PM |

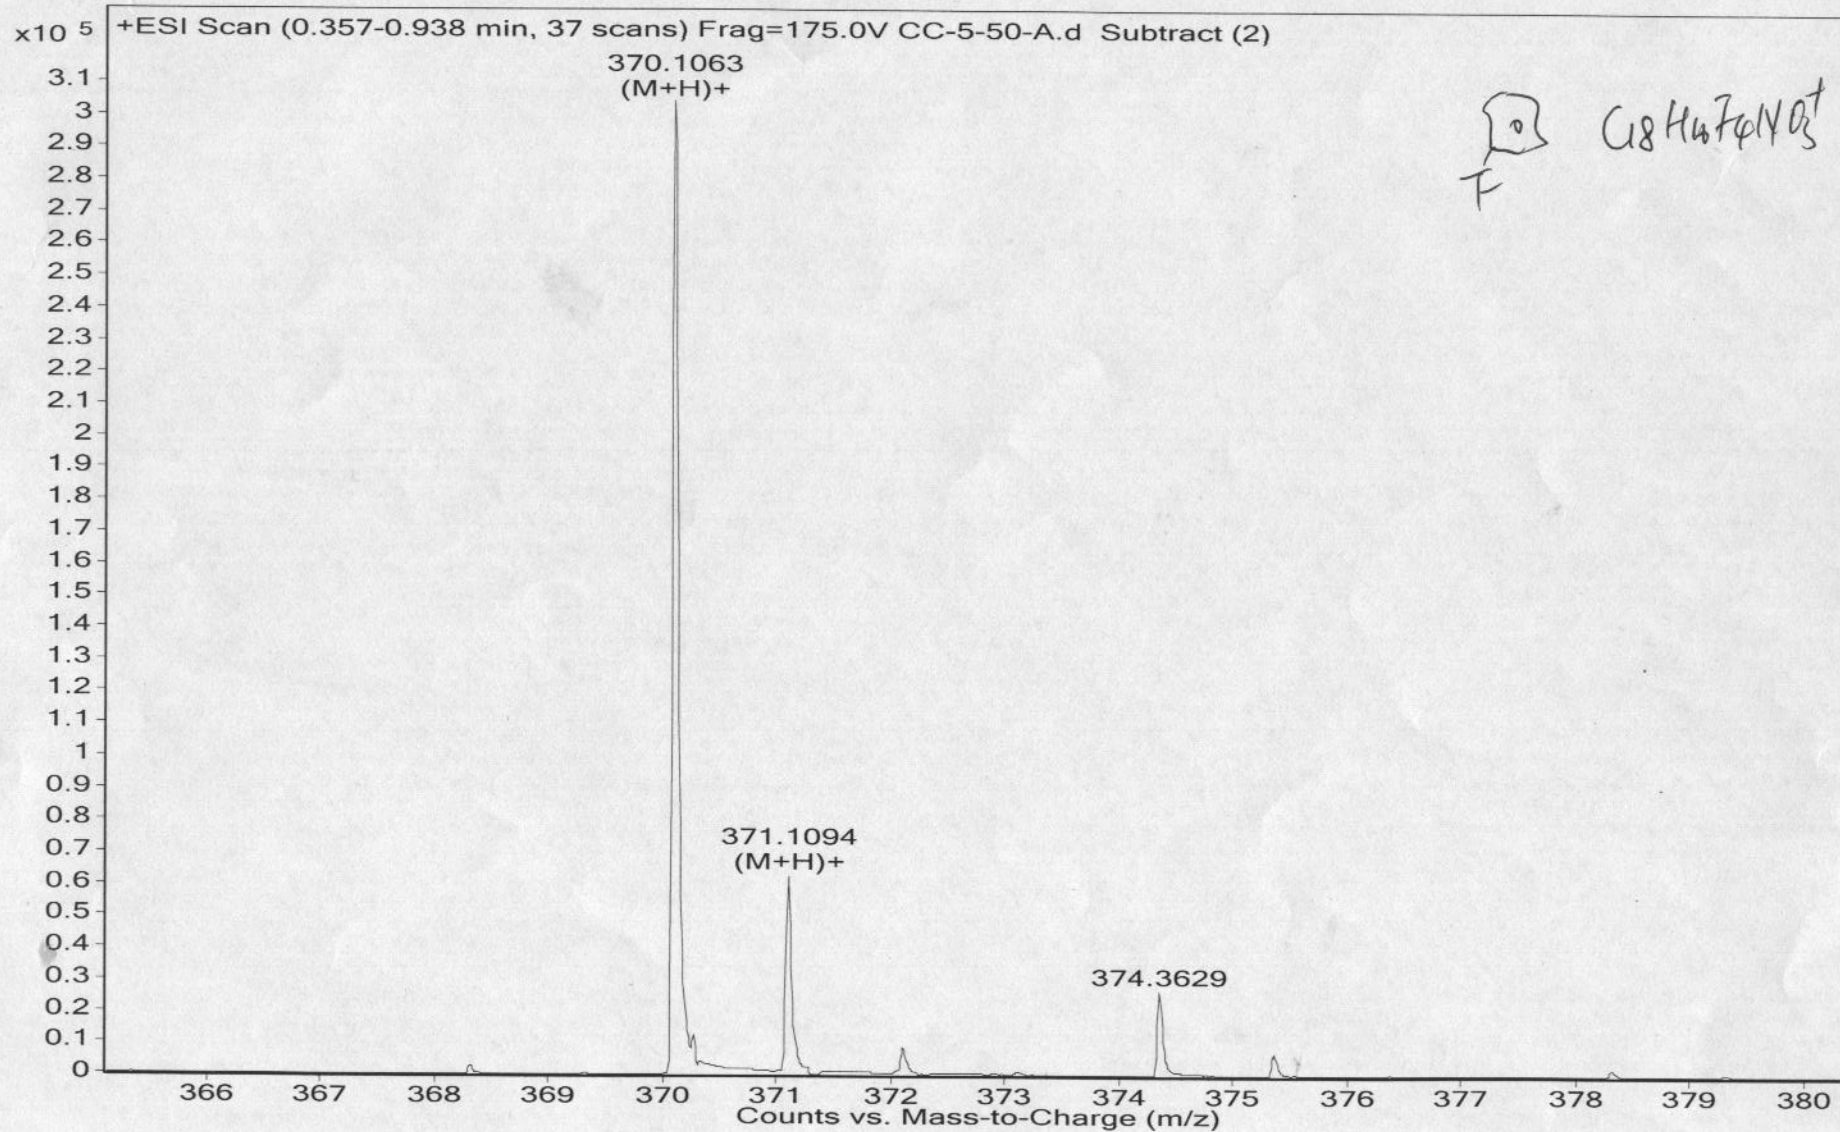





7.55  
7.53  
7.41  
7.40  
7.26  
7.18  
7.16  
6.86  
6.84  
6.33  
4.52  
4.50  
4.48  
4.46  
4.45  
4.44  
4.41  
3.79  
1.57  
0.00



2.01  
3.00  
1.99  
1.99  
1.04  
2.03  
3.01  
3.00

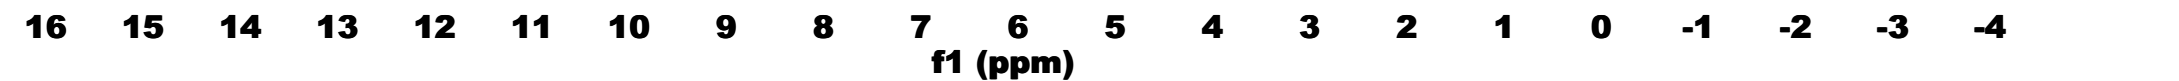

CC-CH30-kailian  
F19CPD

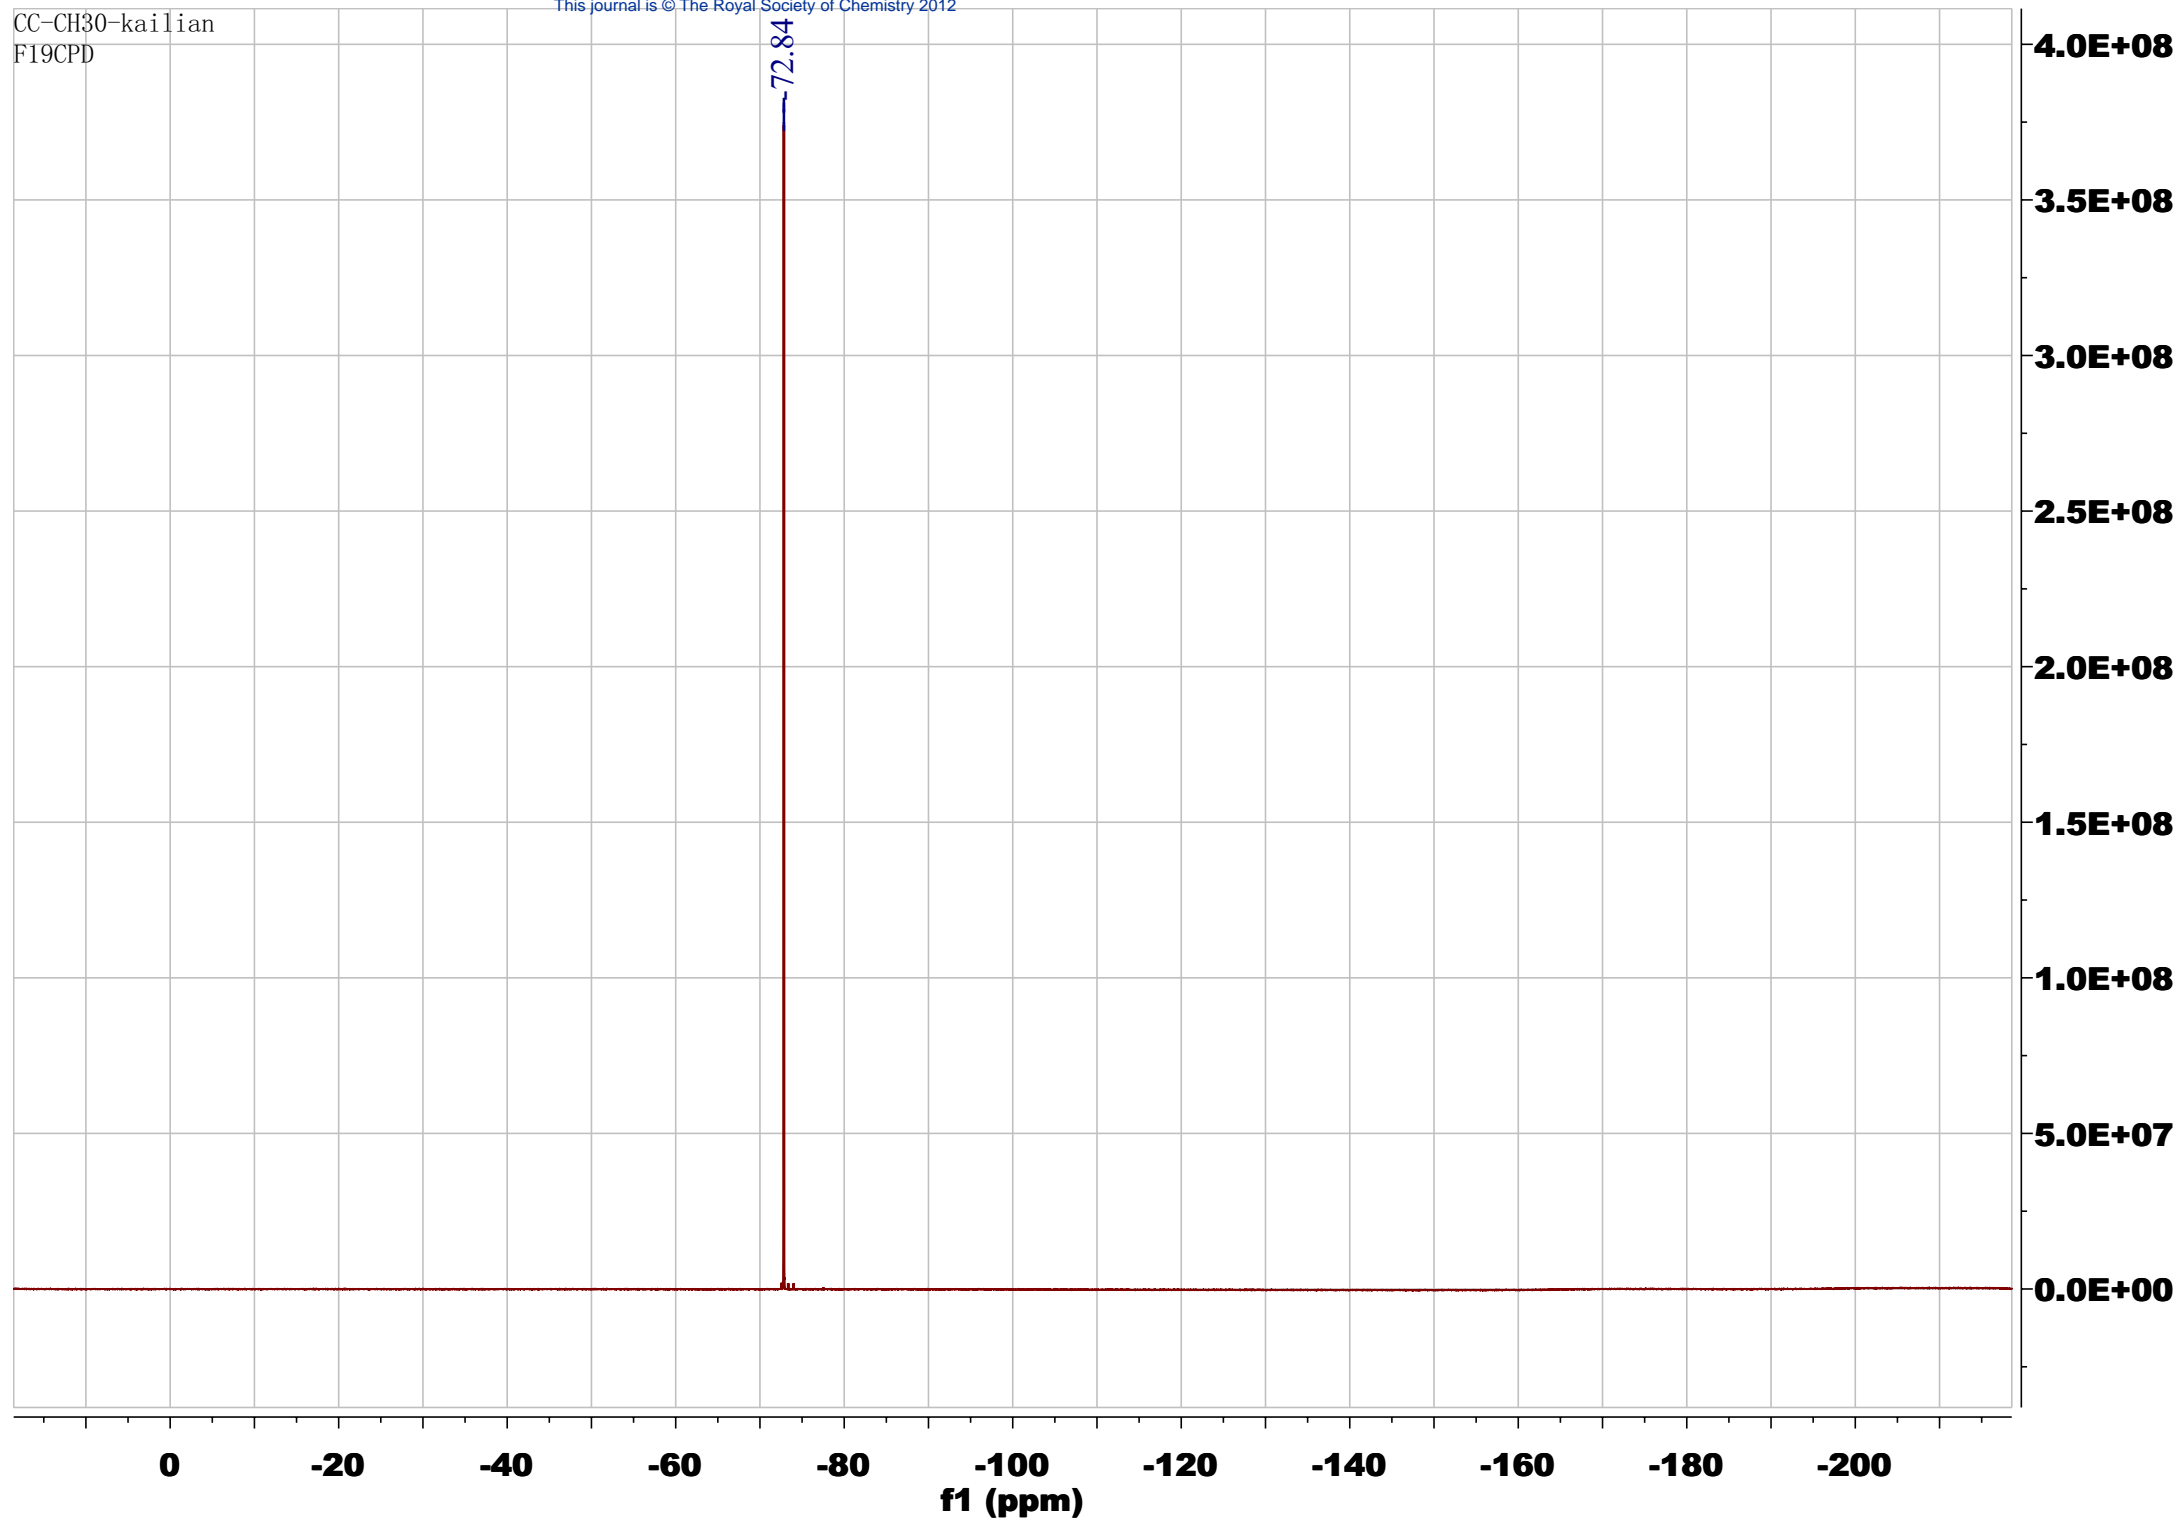



Varian QFT-ESI  
File: Zc-3-44\_ESI.trans

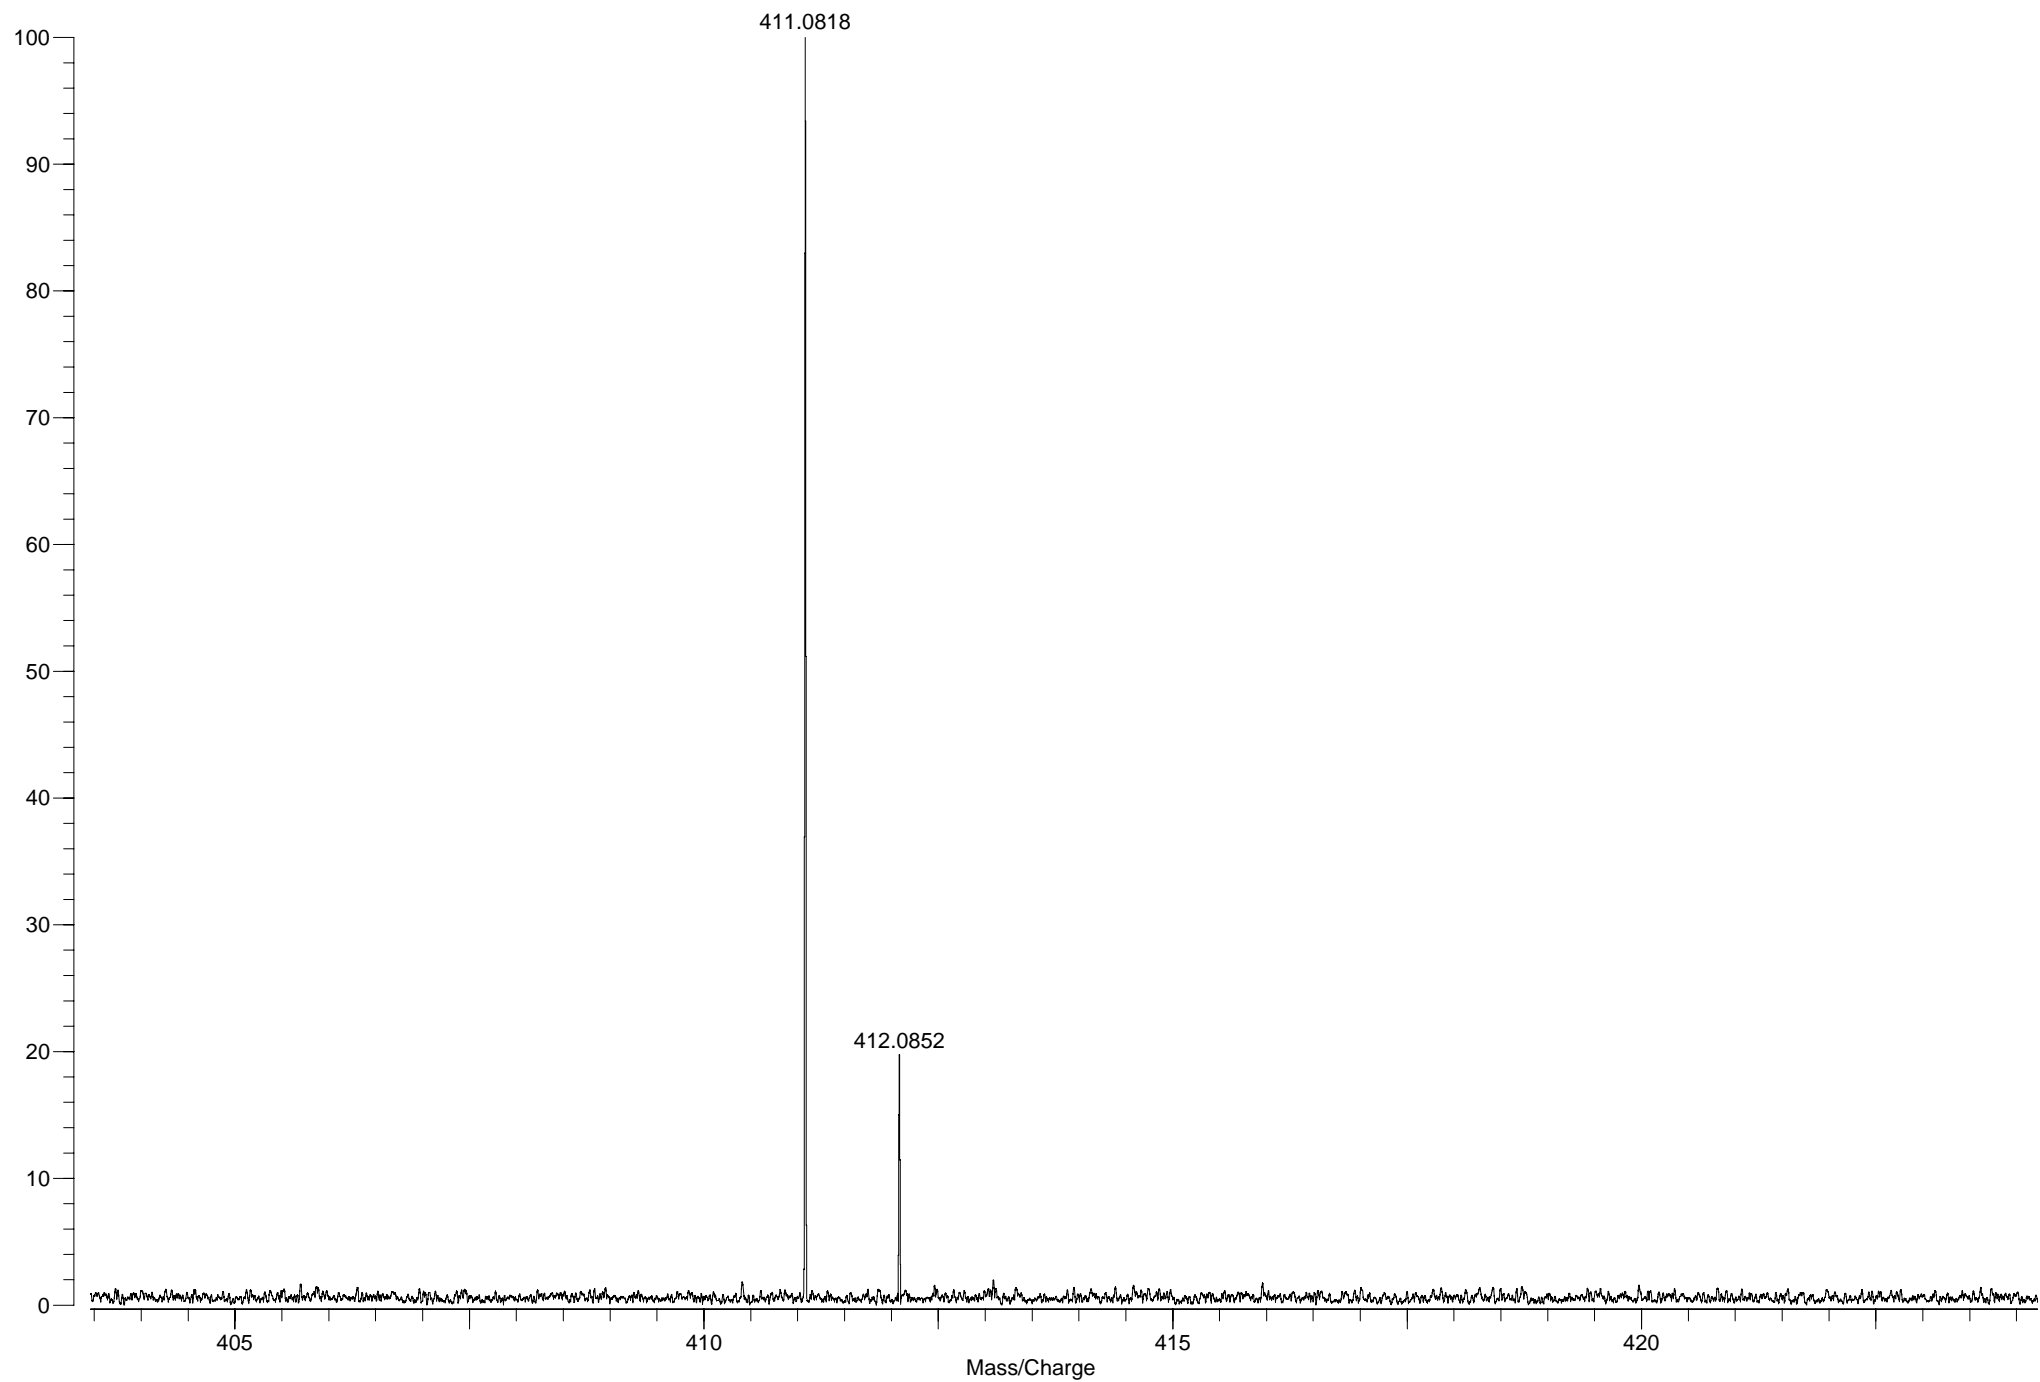



7.53  
7.52  
7.42  
7.40  
7.26  
7.24  
7.22  
7.20  
7.03  
7.01  
6.99  
6.42  
4.55  
4.53  
4.51  
4.49  
4.48  
4.46  
4.44  
2.29  
1.62  
1.56  
1.53



2.03  
3.06  
2.01  
2.01  
1.00

4.5E+08  
4.0E+08  
3.5E+08  
3.0E+08  
2.5E+08  
2.0E+08  
1.5E+08  
1.0E+08  
5.0E+07  
0.0E+00

16 15 14 13 12 11 10 9 8 7 6 5 4 3 2 1 0 -1 -2 -3 -4  
f1 (ppm)

cc-f-p-b-f  
F19CPD



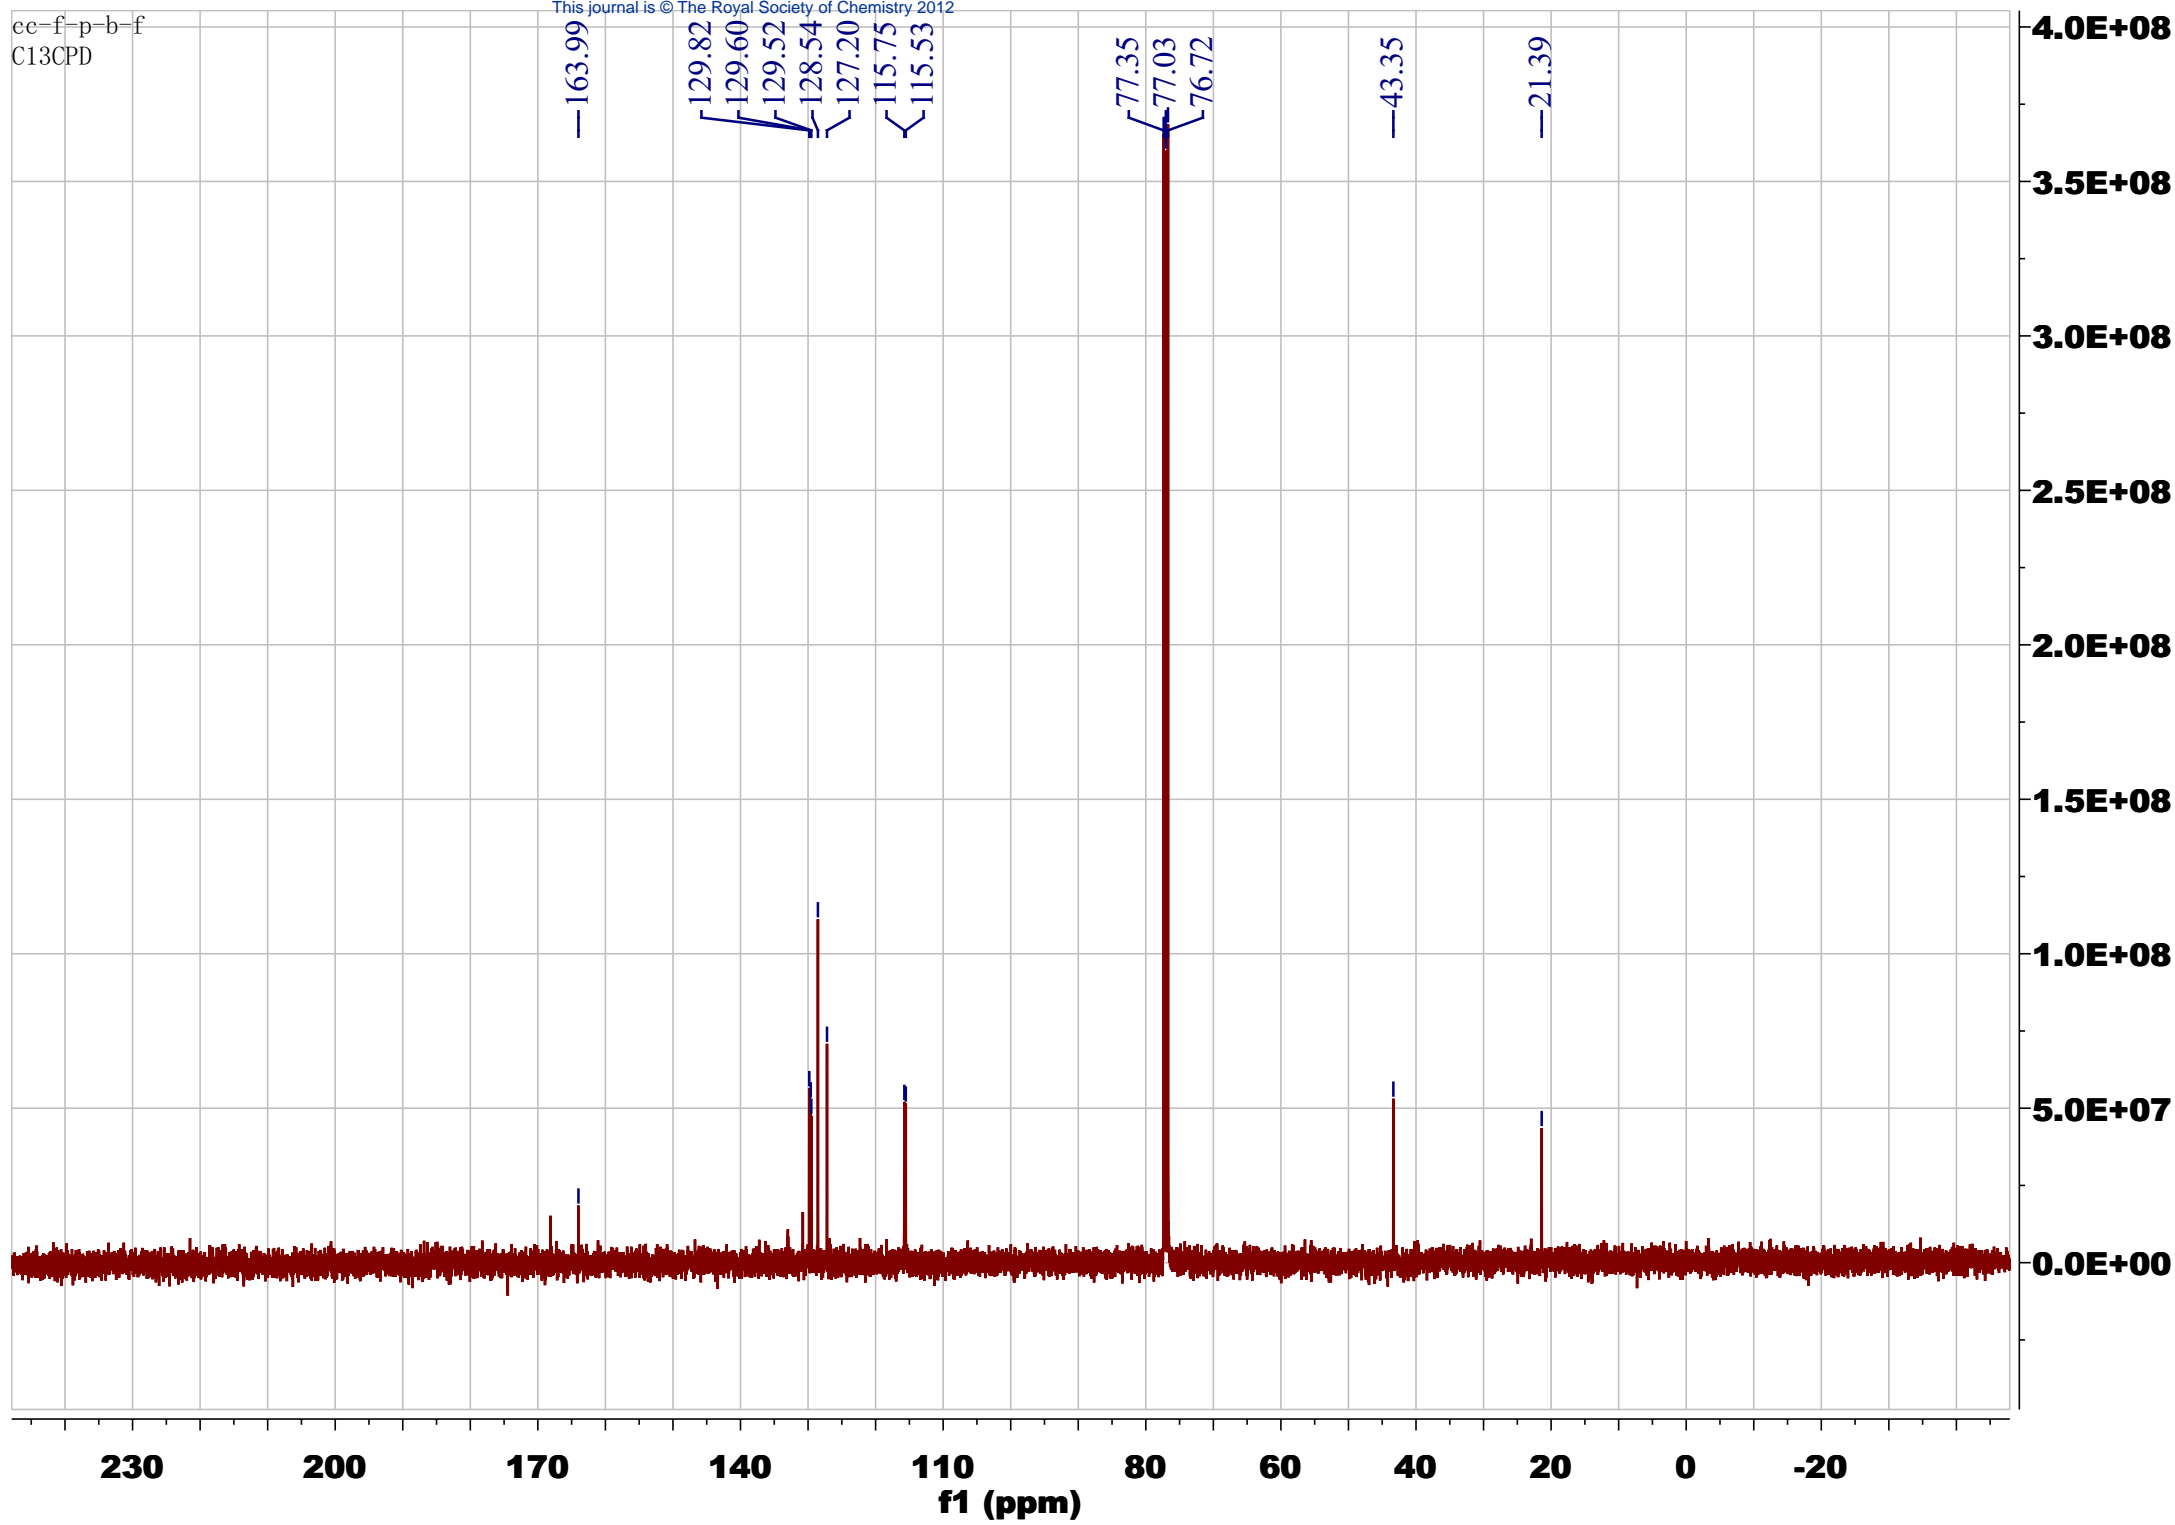

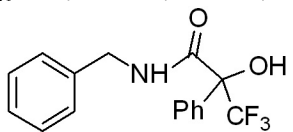

Chemical Formula: C<sub>16</sub>H<sub>14</sub>F<sub>3</sub>NO<sub>2</sub>  
 Exact Mass: 309.0977

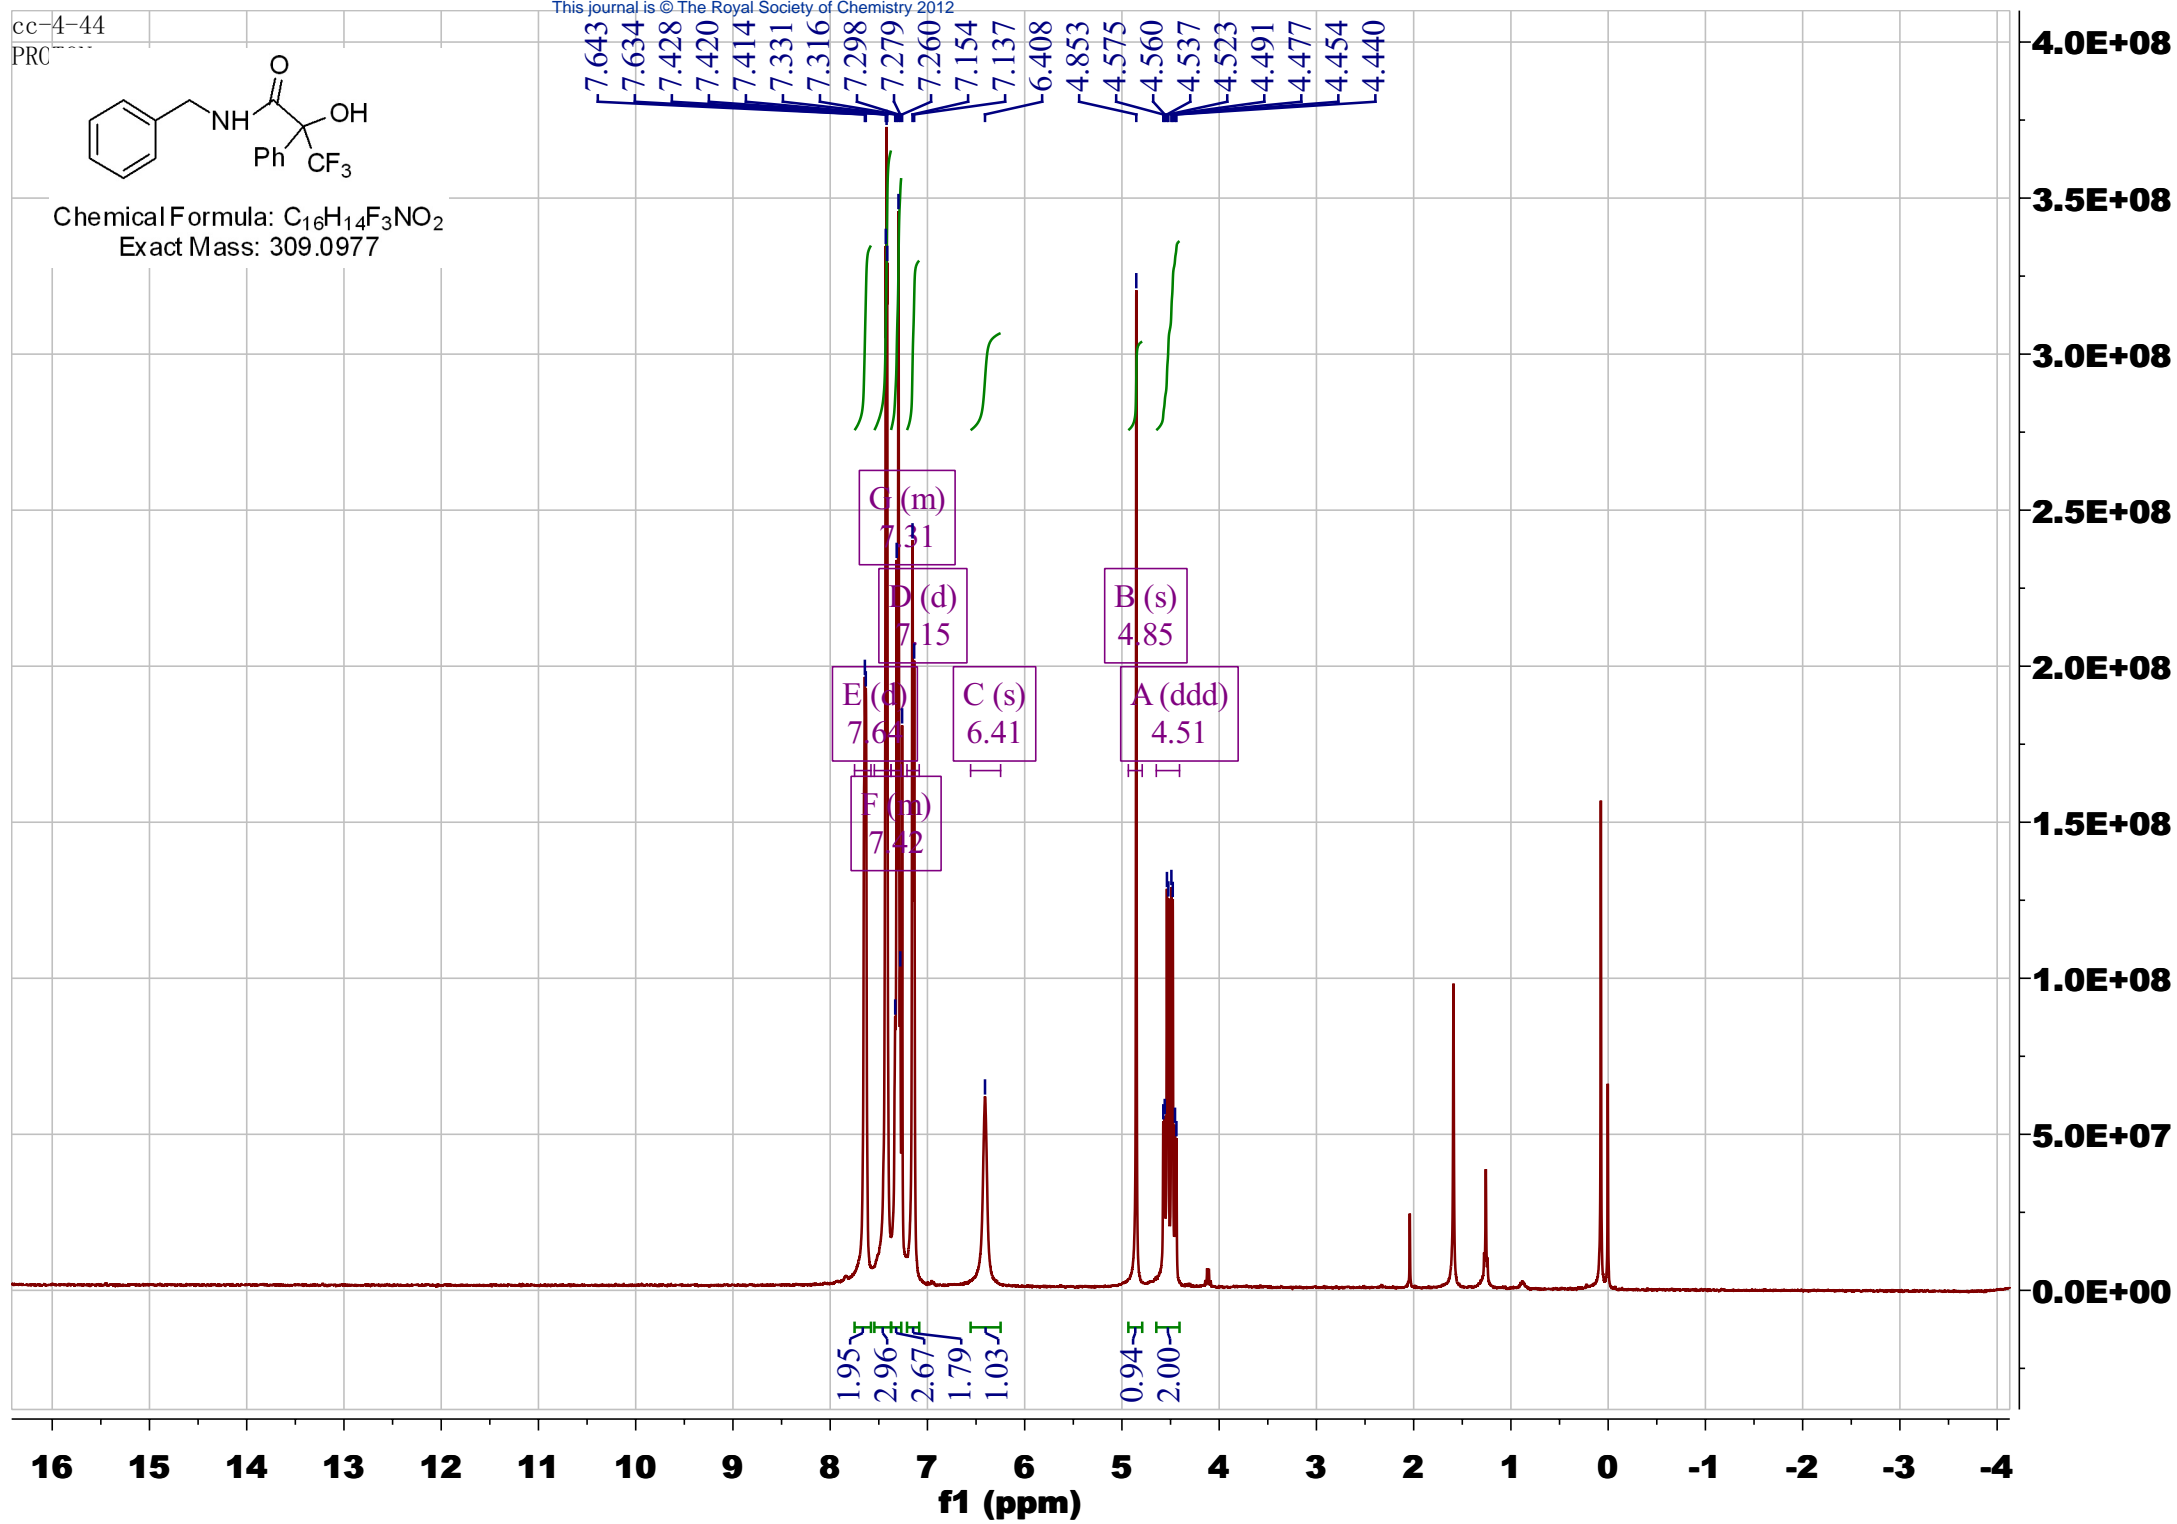



cc-4-44-c  
C13CNMR (101 MHz, CDCl<sub>3</sub>) δ 167.24, 136.69, 134.33, 129.62, 129.00, 128.88, 128.99, 127.37, 126.31, 44.47.

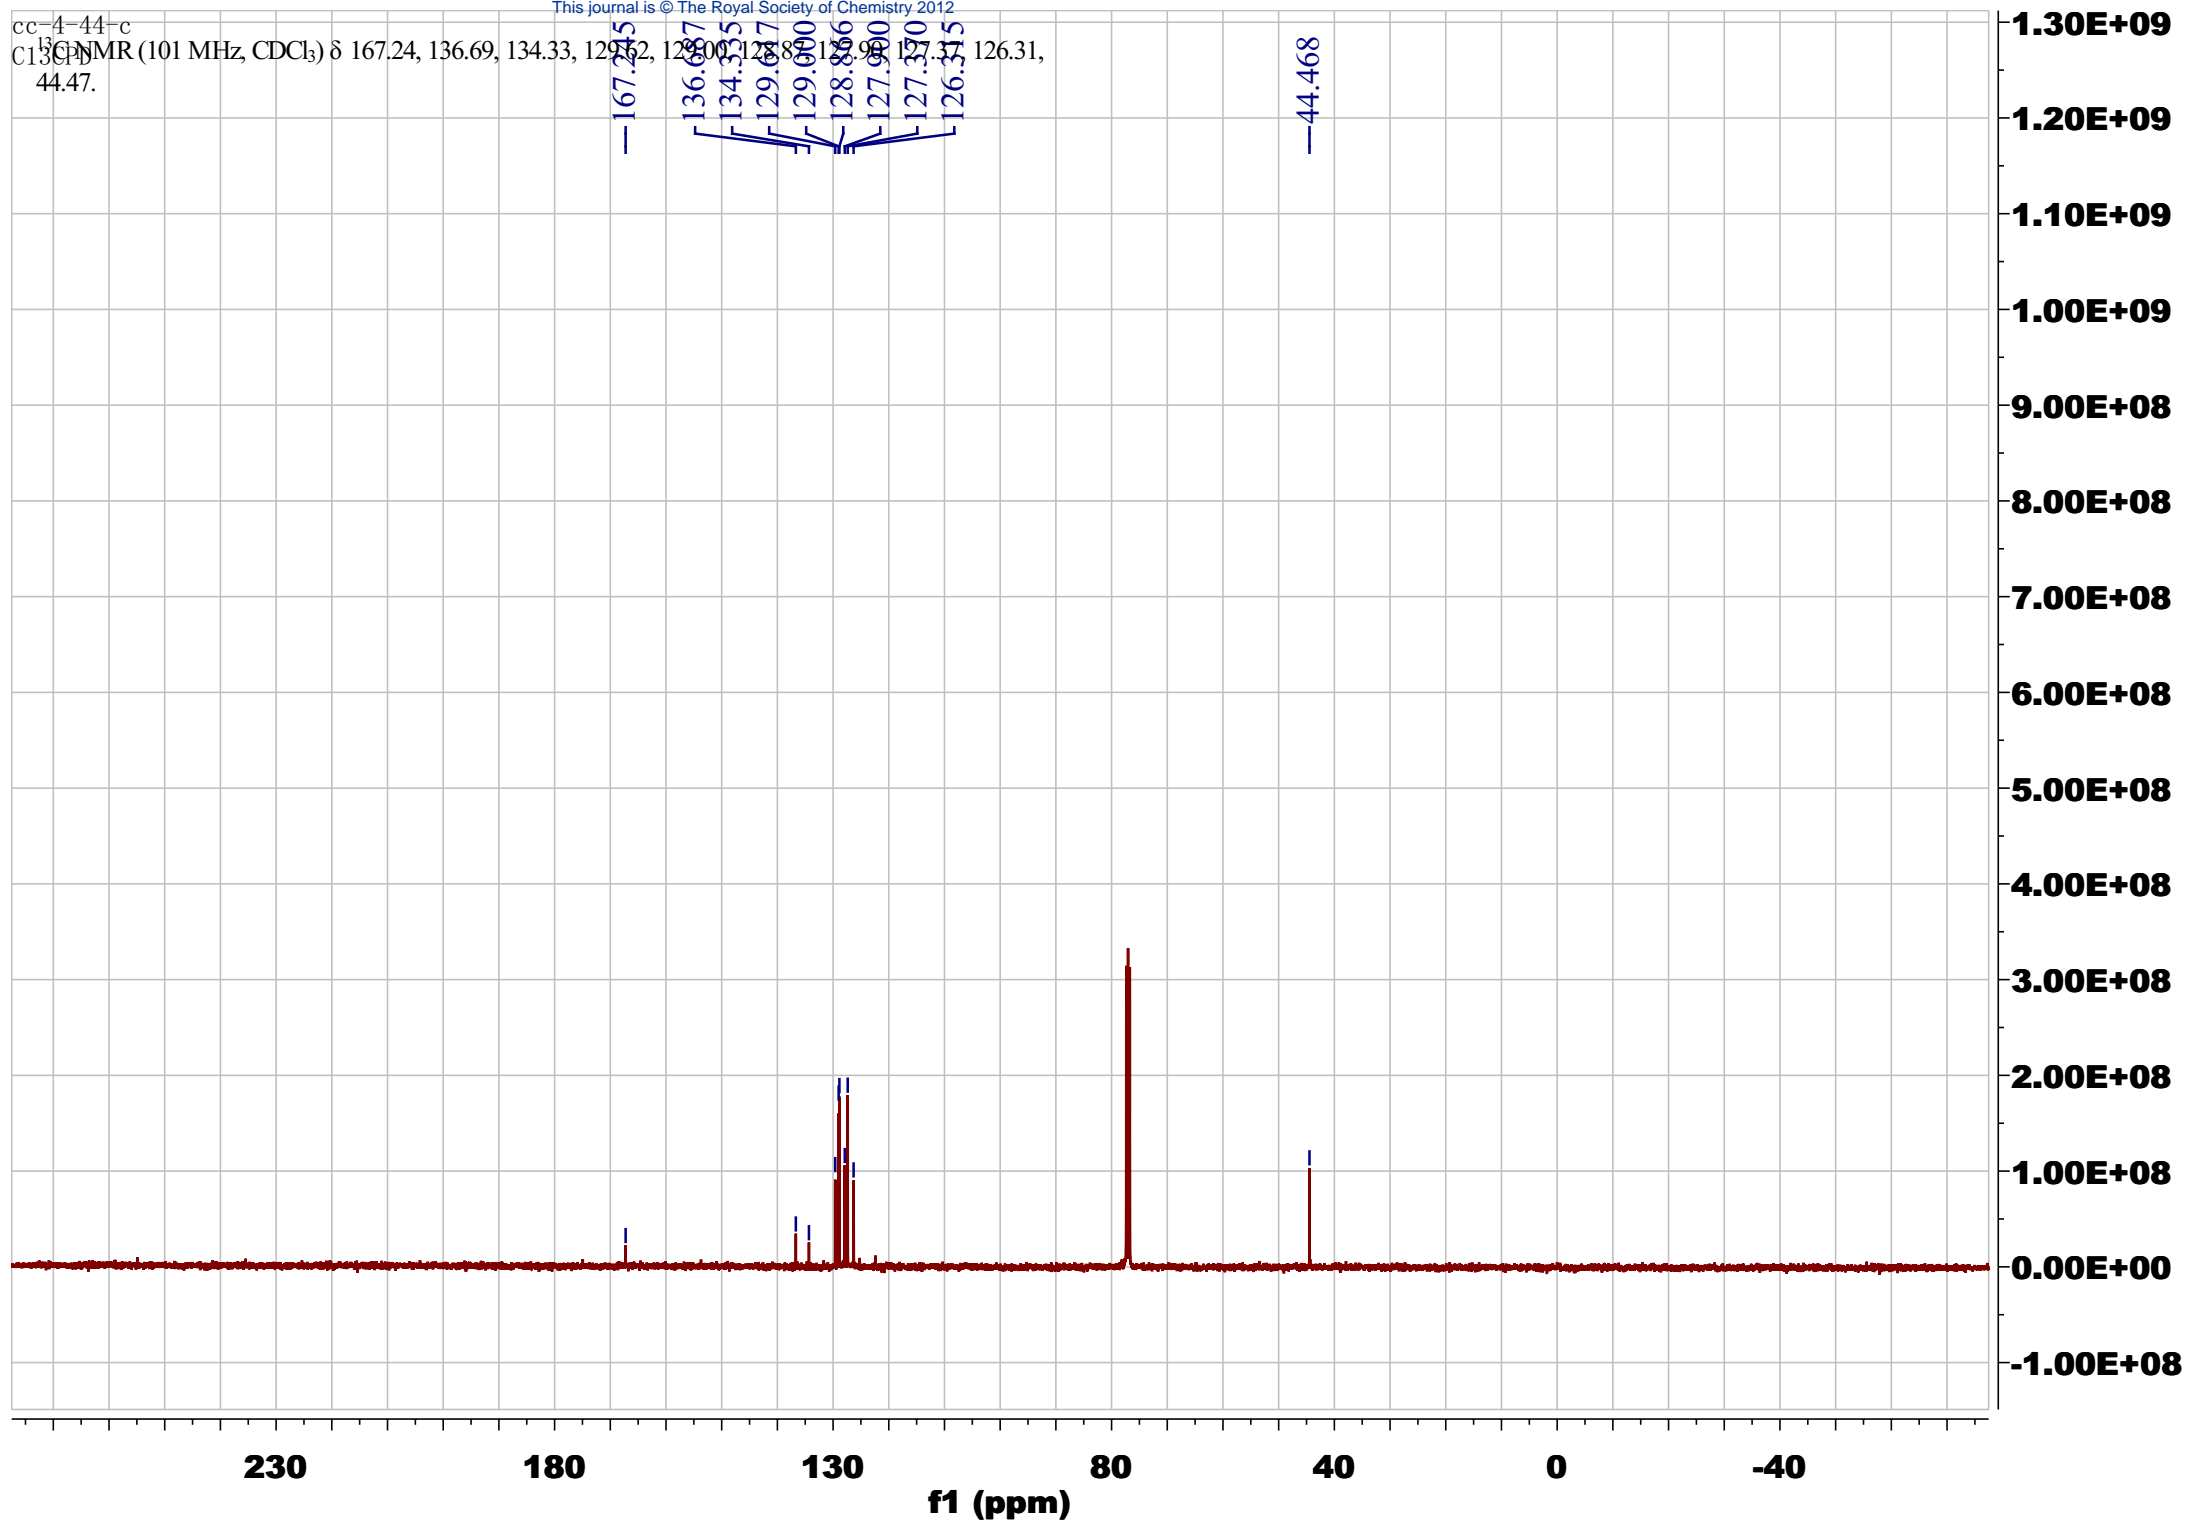

cc-4-44-c  
F19F NMR (376 MHz, CDCl<sub>3</sub>) δ -74.01.

Electronic Supplementary Material (ESI) for Green Chemistry  
This journal is © The Royal Society of Chemistry 2012

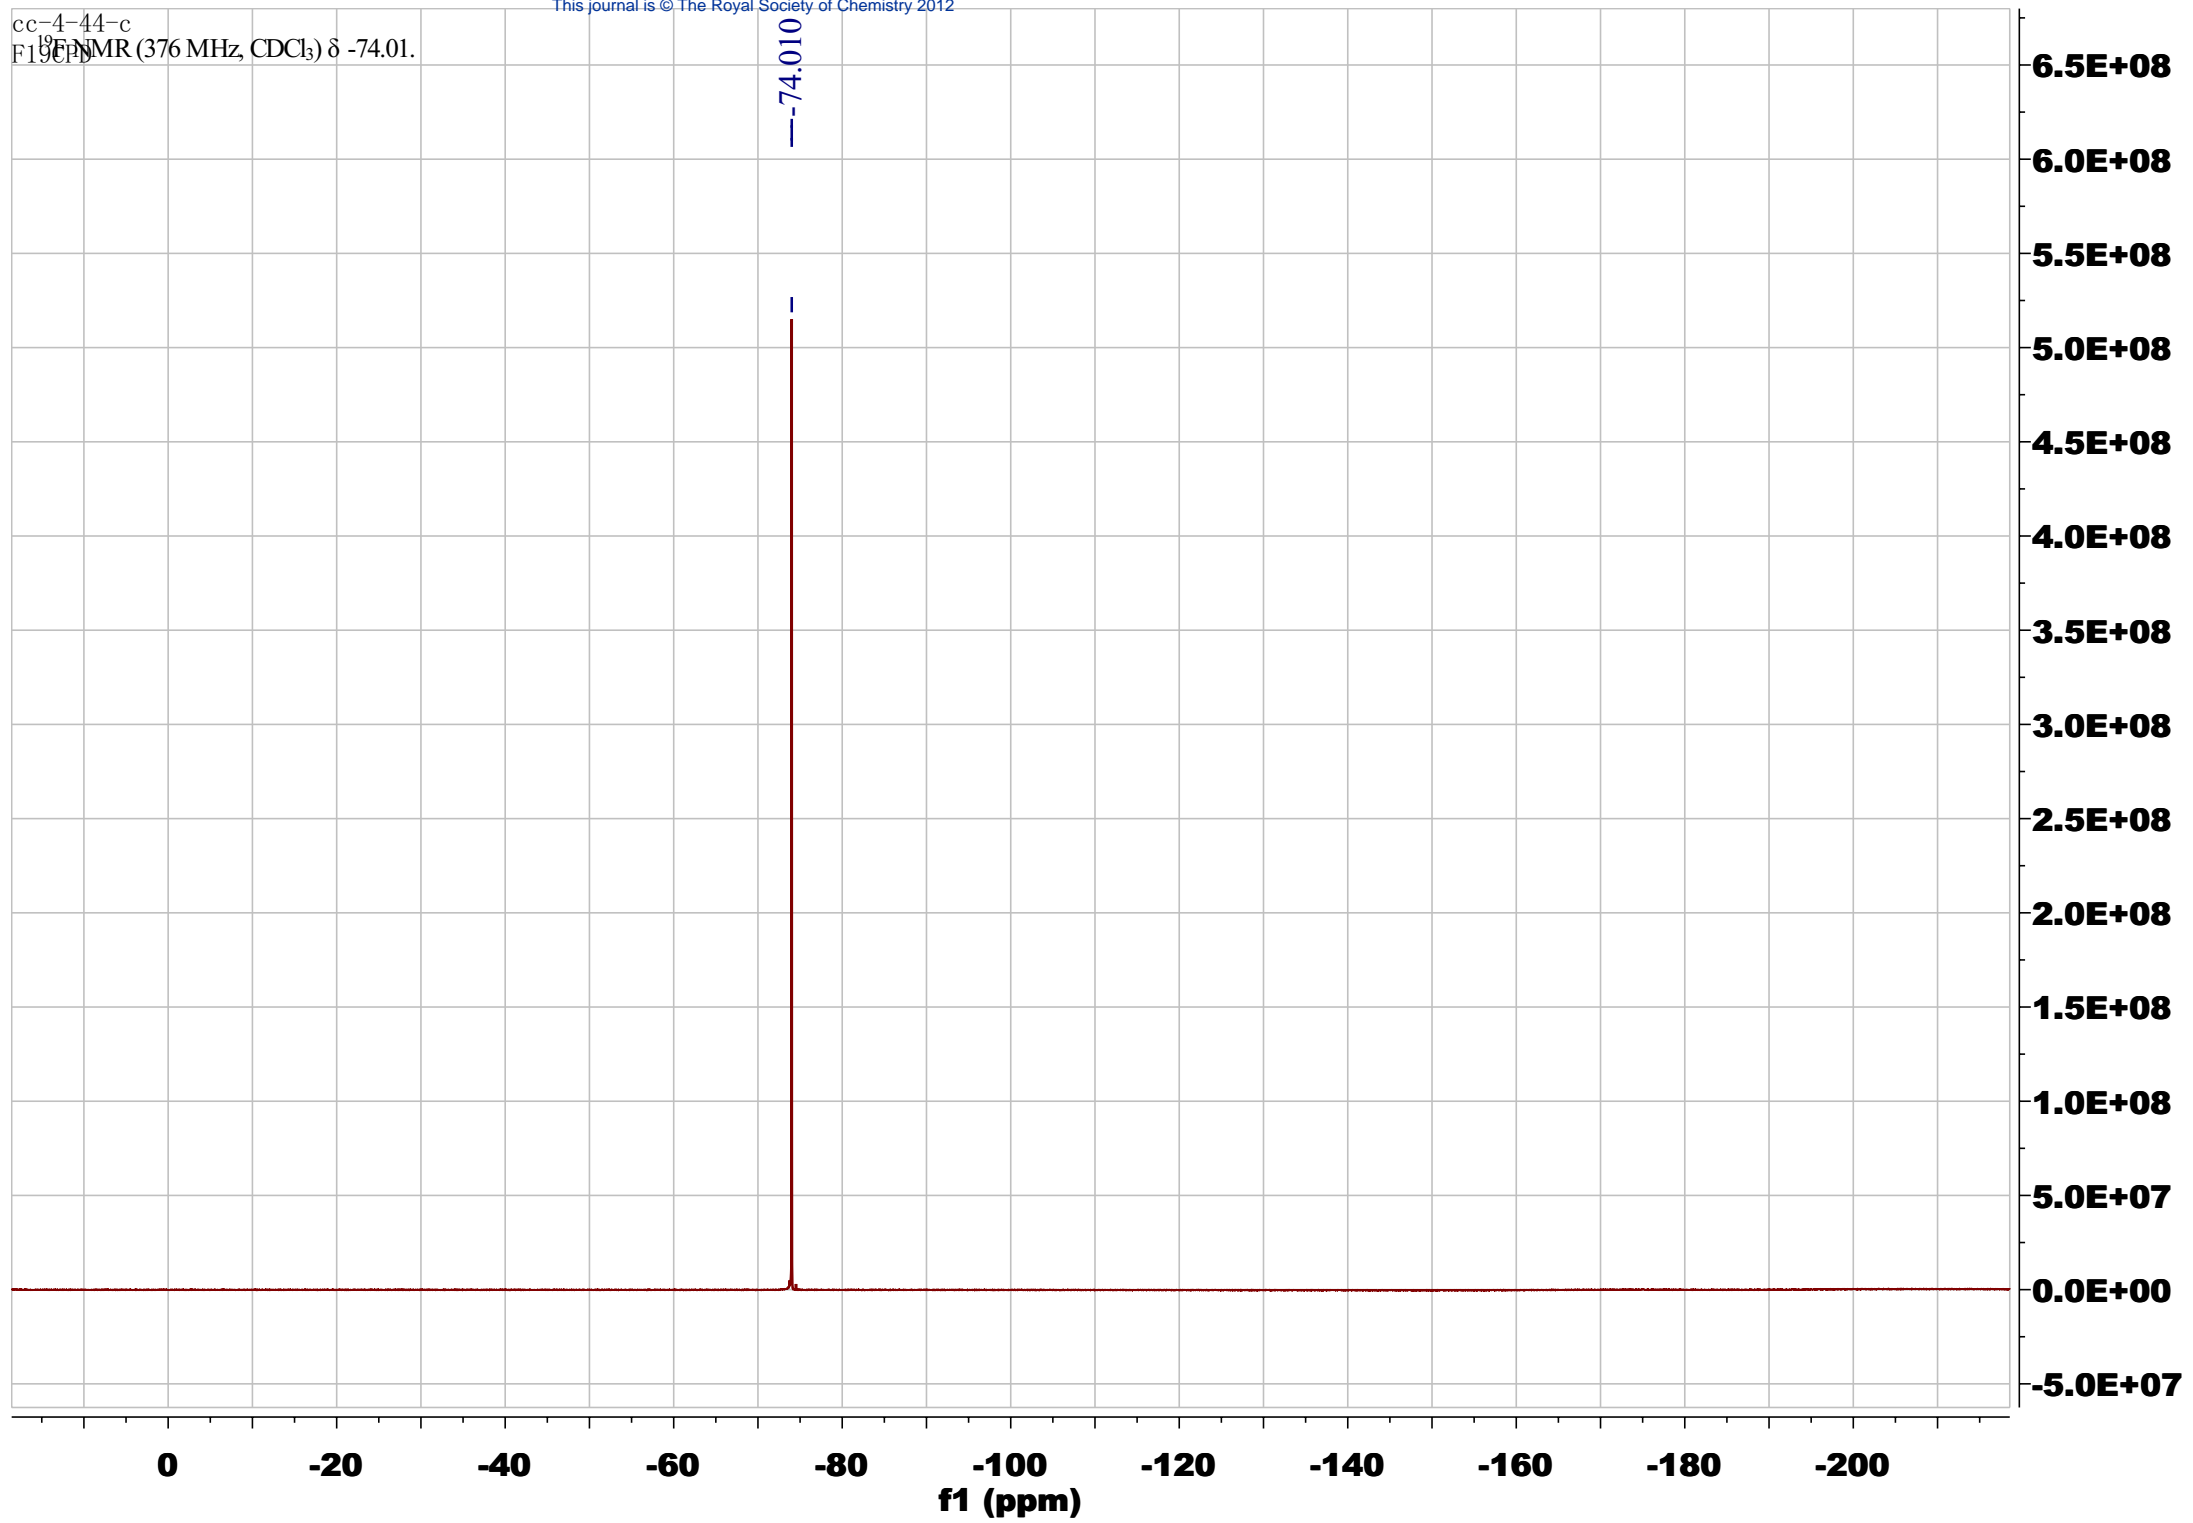

310.1049

水解产物

|               |                |             |           |                 |                      |                        |                       |
|---------------|----------------|-------------|-----------|-----------------|----------------------|------------------------|-----------------------|
| Sample Name   | lc/ms          | Position    | Vial 1    | Instrument Name | Agilent_G6520_QTOF_L | User Name              | Agilent FSE           |
| Inj Vol       | 1              | InjPosition |           | SampleType      | Sample               | IRM Calibration Status | Some Ions Missed      |
| Data Filename | CC-4-44.d (6a) | ACQ Method  | chen-ms.m | Comment         |                      | Acquired Time          | 4/19/2012 11:20:48 AM |

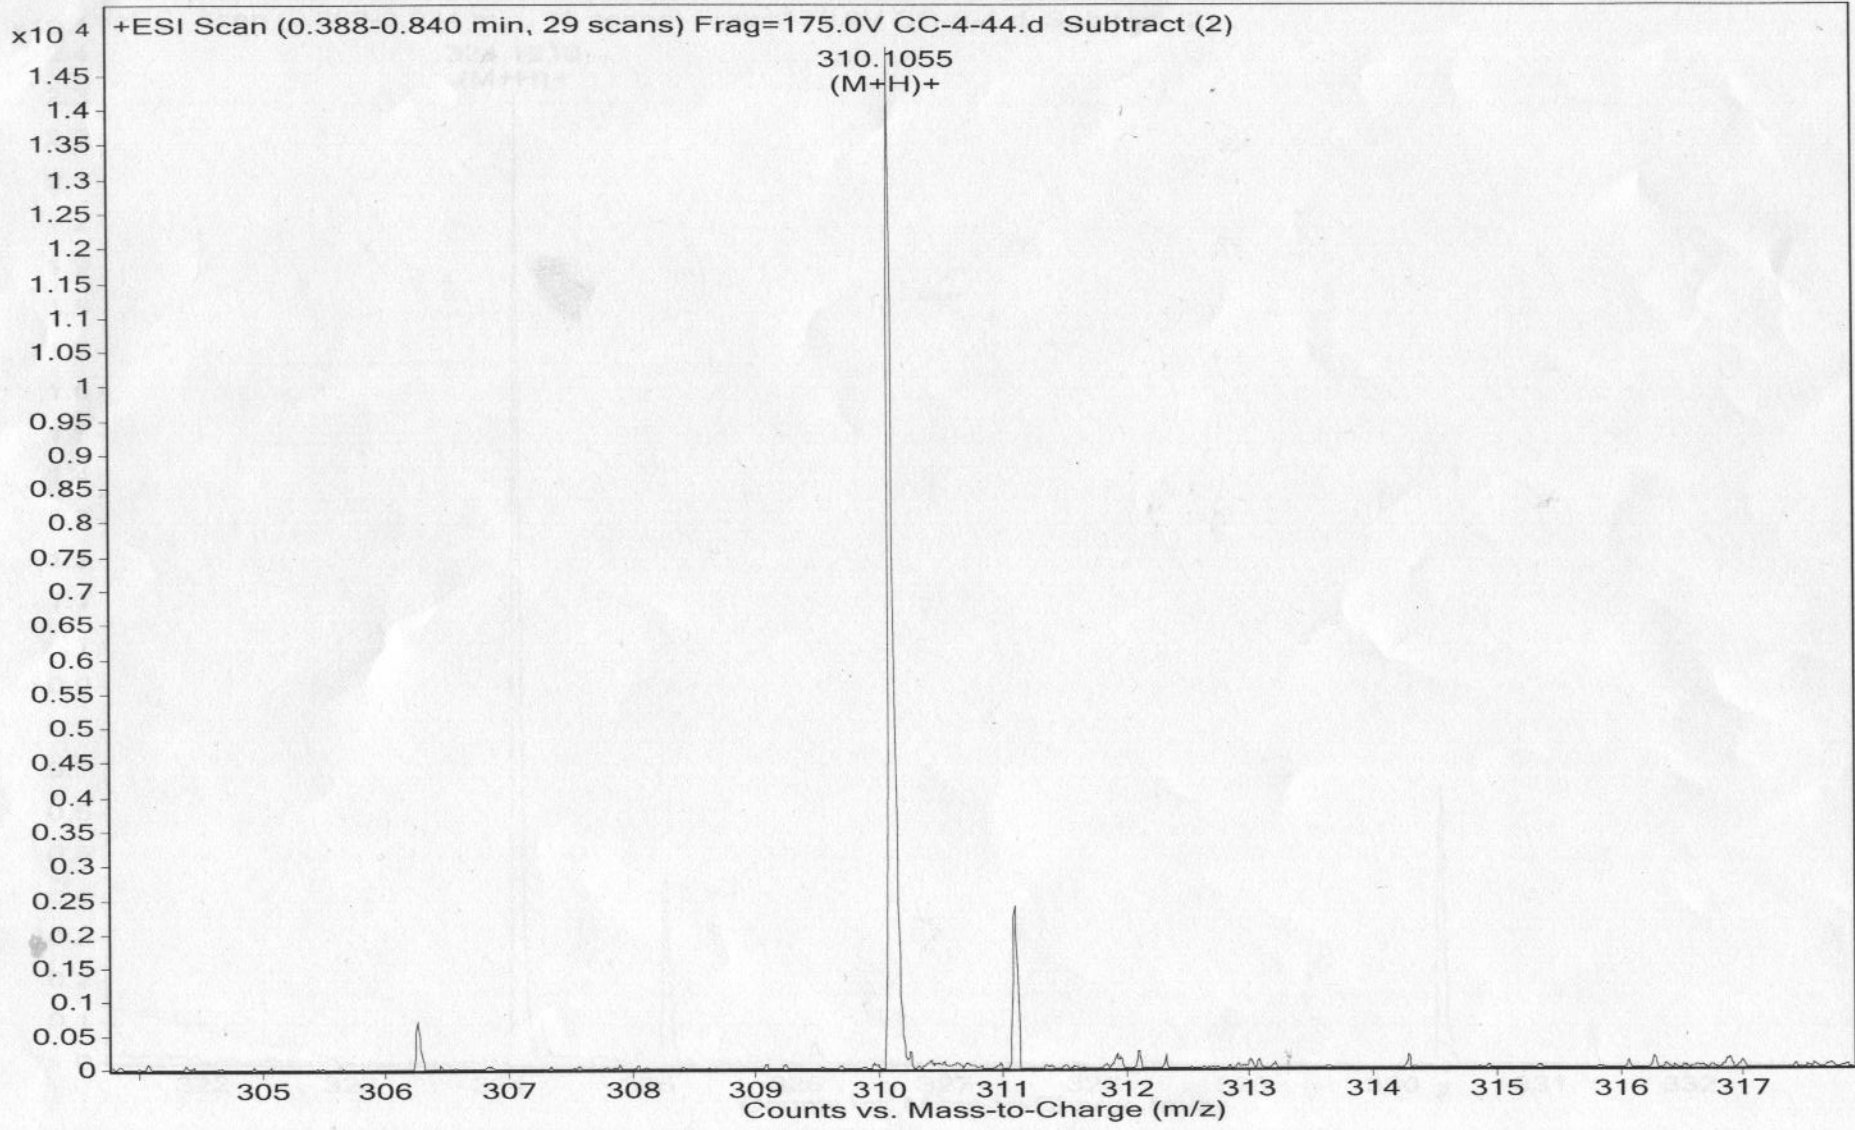

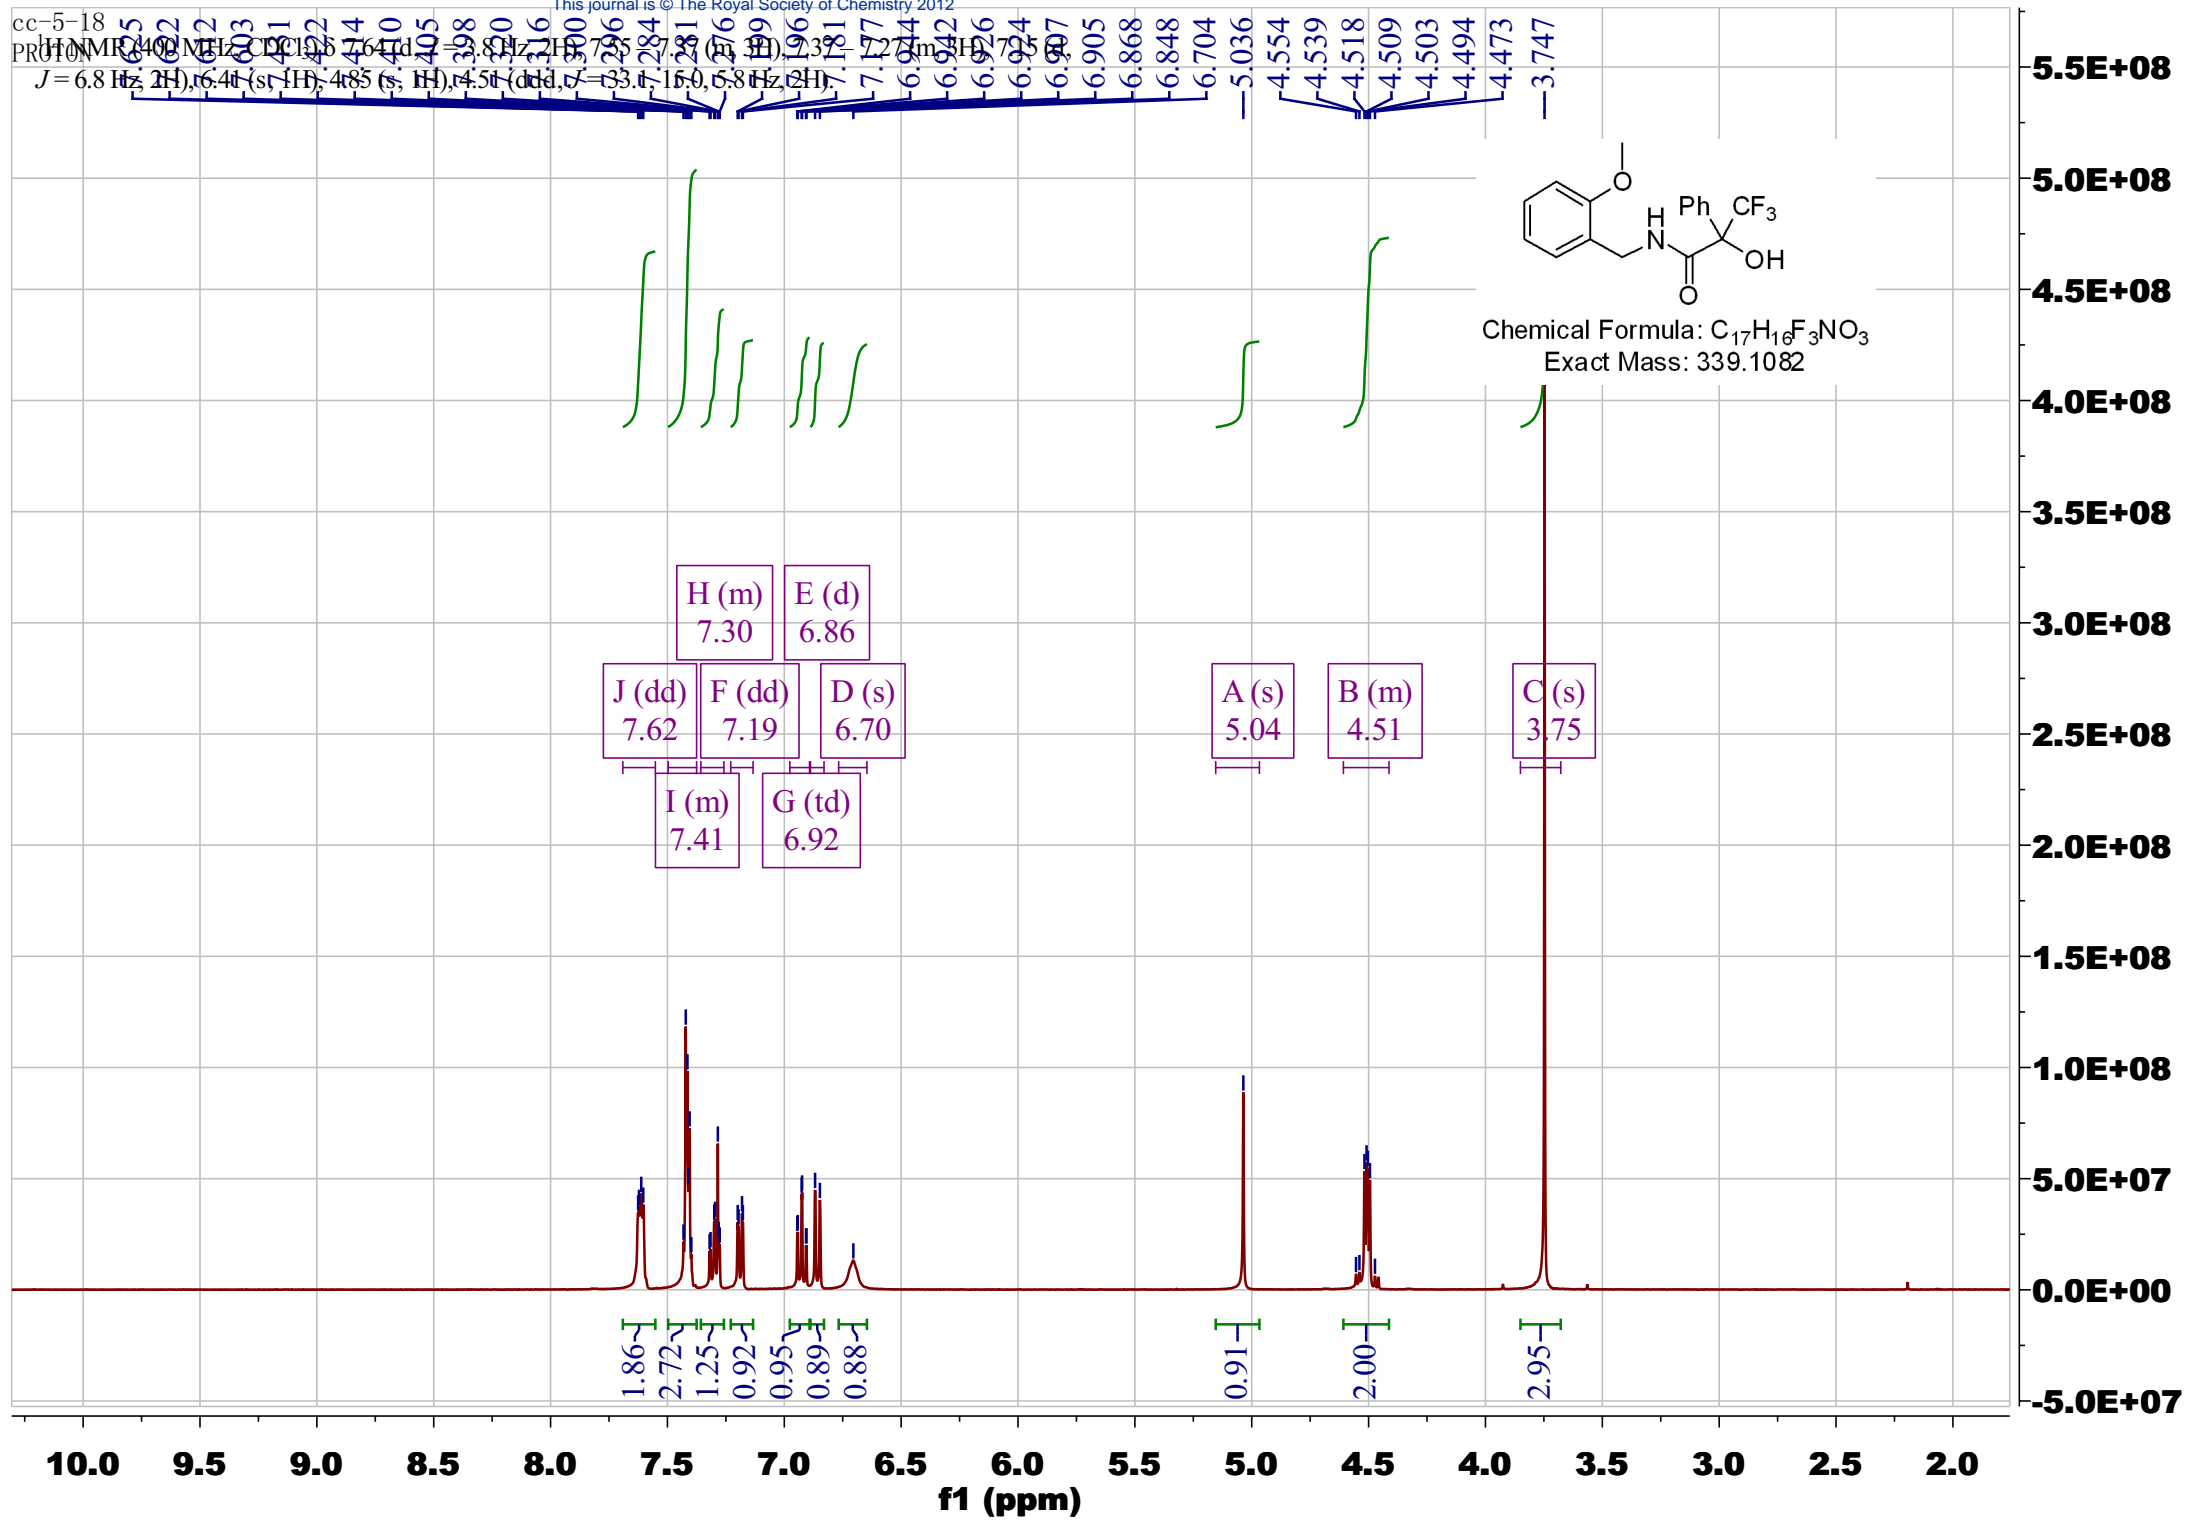

cc-5-18-c  
C13CPD

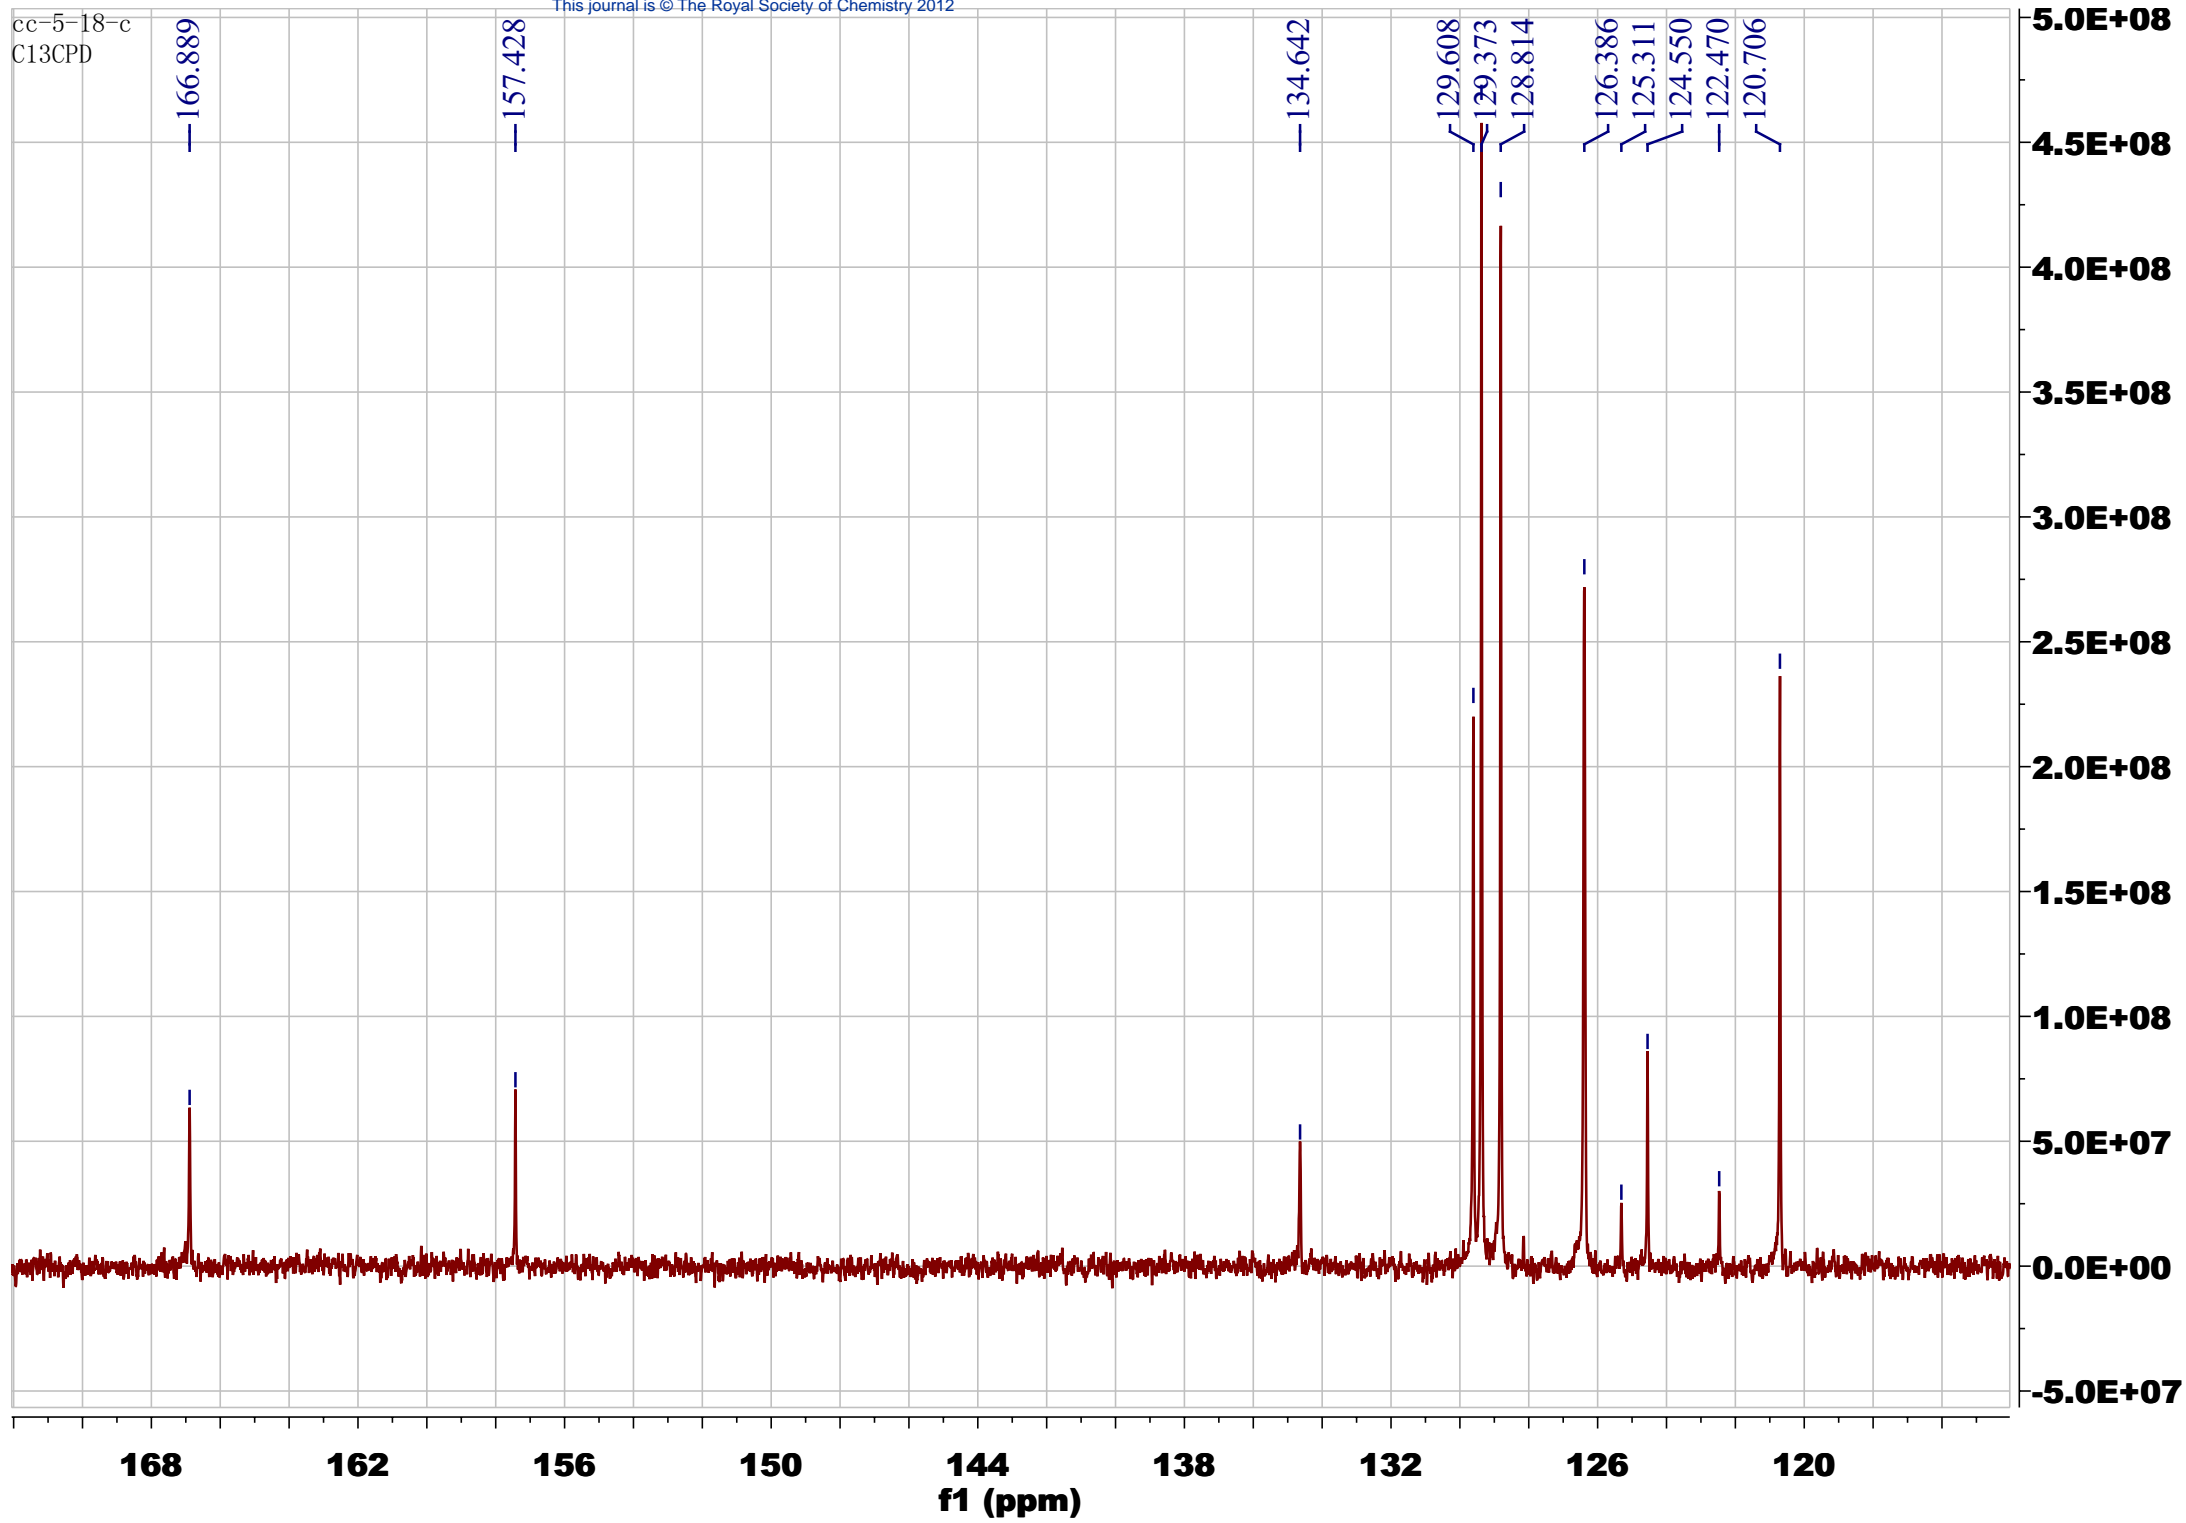

cc-5-18-c  
F19C1NMR (376 MHz, CDCl<sub>3</sub>) δ -74.14.

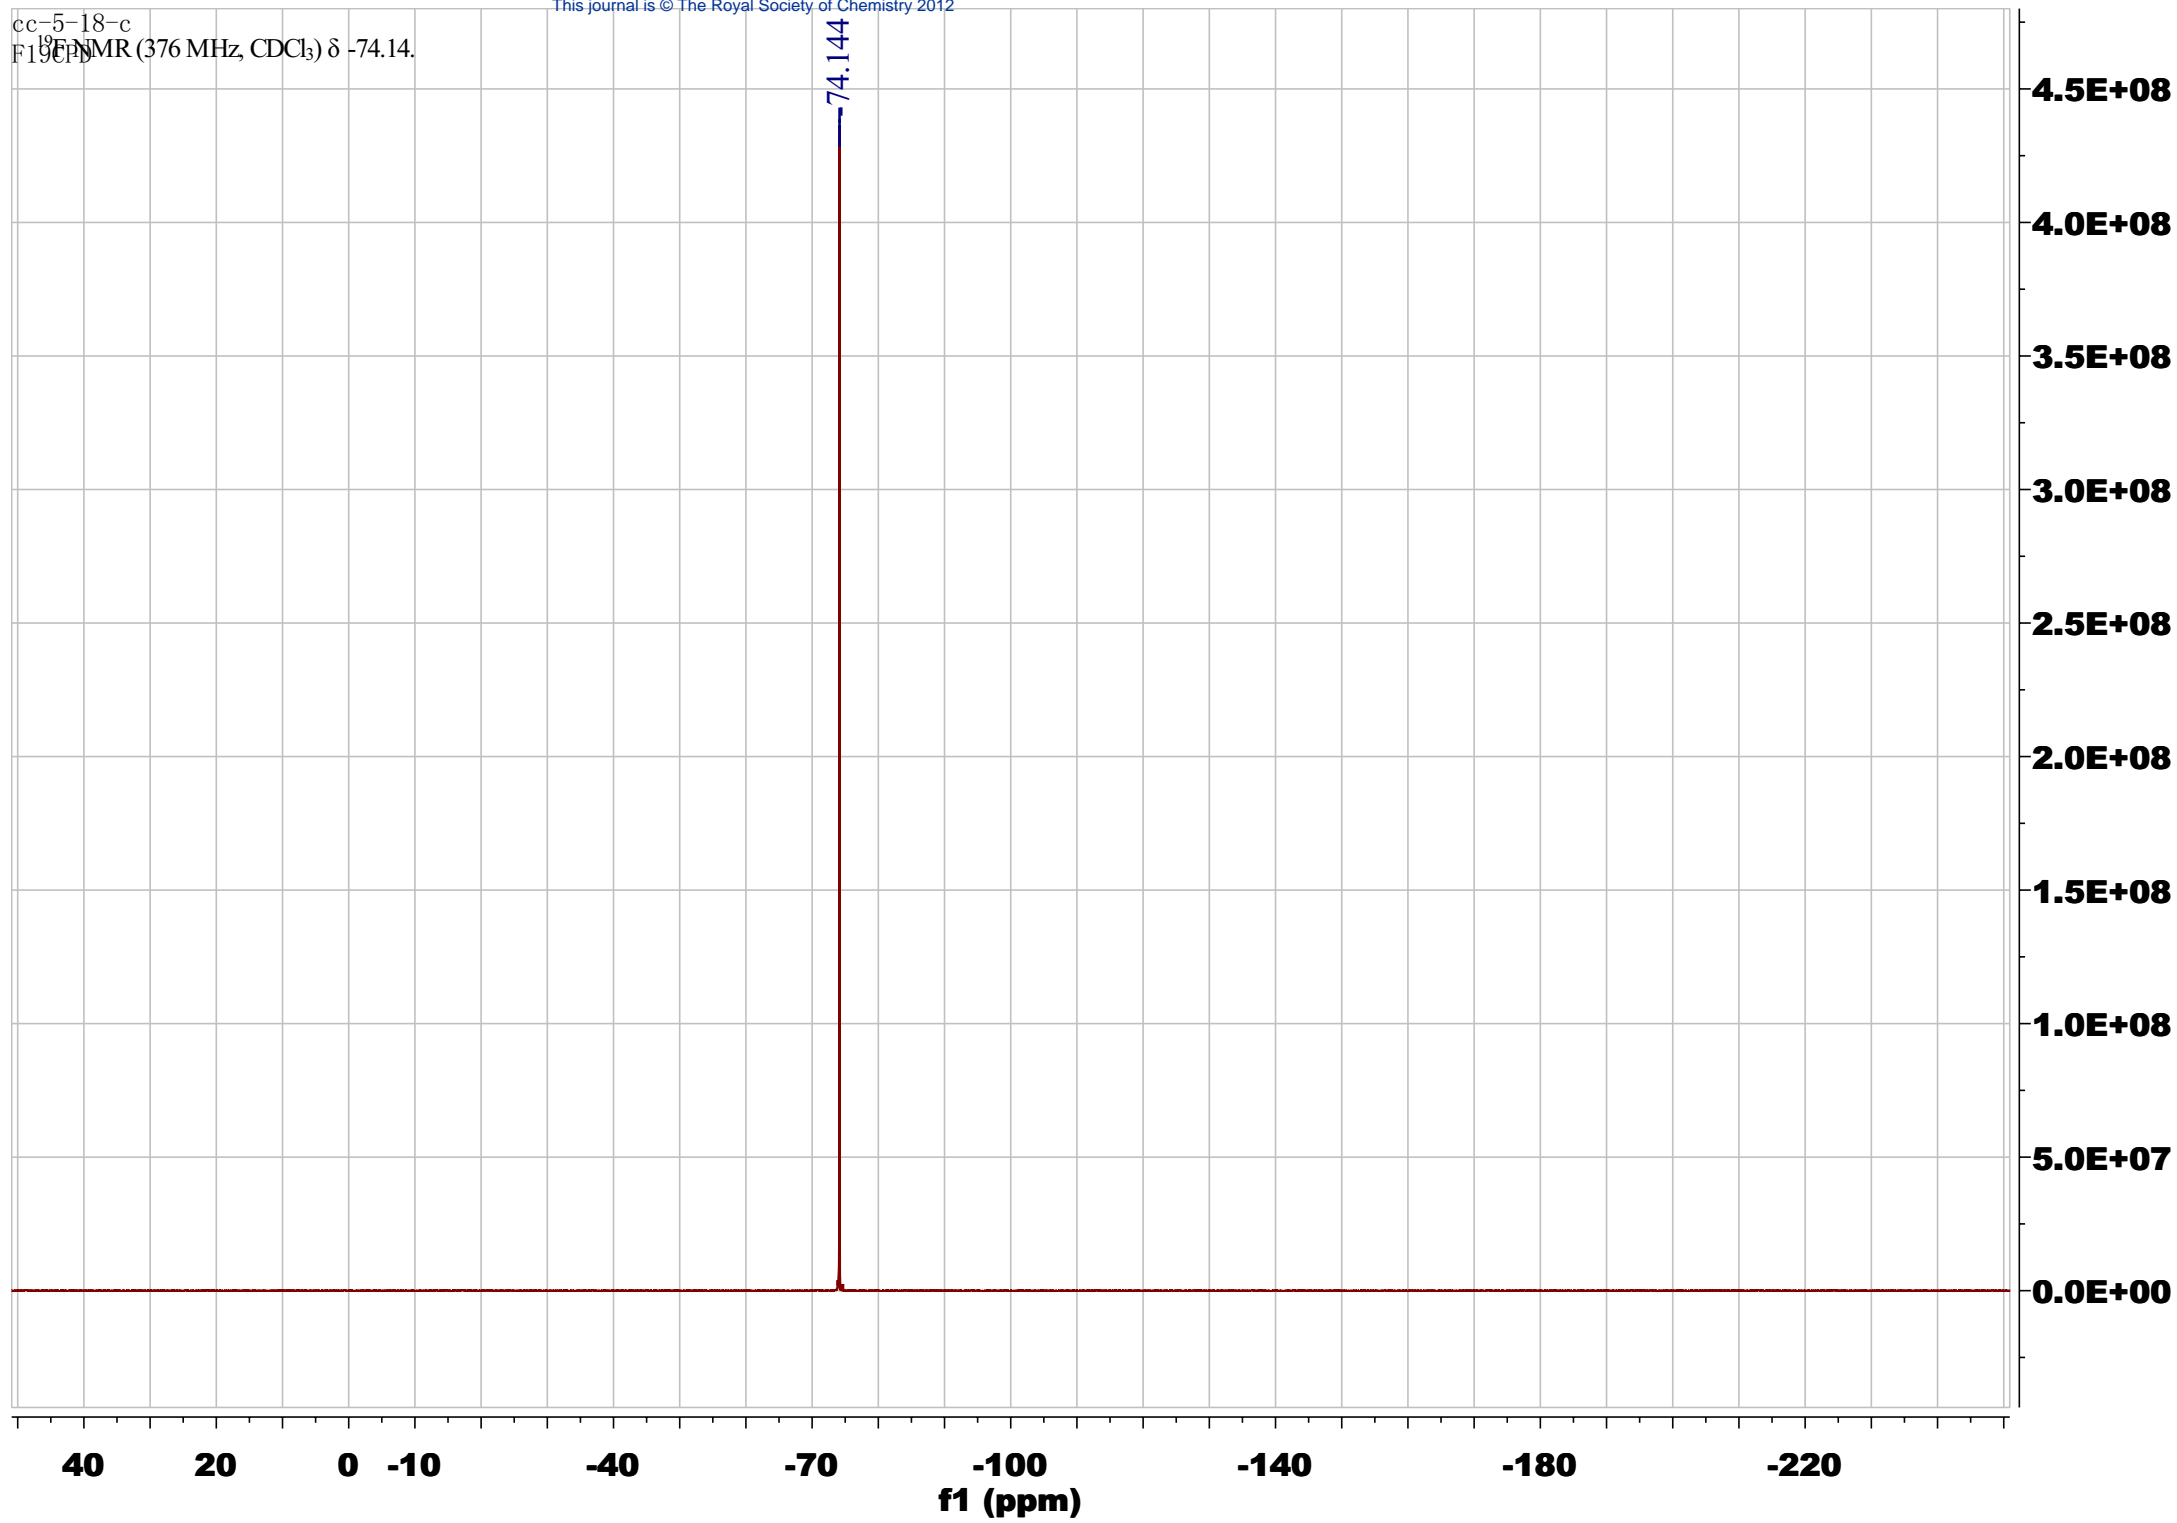

324.1206

|               |               |             |           |                 |                      |                        |                       |
|---------------|---------------|-------------|-----------|-----------------|----------------------|------------------------|-----------------------|
| Sample Name   | lc/ms         | Position    | Vial 2    | Instrument Name | Agilent_G6520_QTOF_L | User Name              | Agilent FSE           |
| Inj Vol       | 1             | InjPosition |           | SampleType      | Sample               | IRM Calibration Status | Some Ions Missed      |
| Data Filename | CC-5-4.d (6b) | ACQ Method  | chen-ms.m | Comment         |                      | Acquired Time          | 4/19/2012 11:24:29 AM |

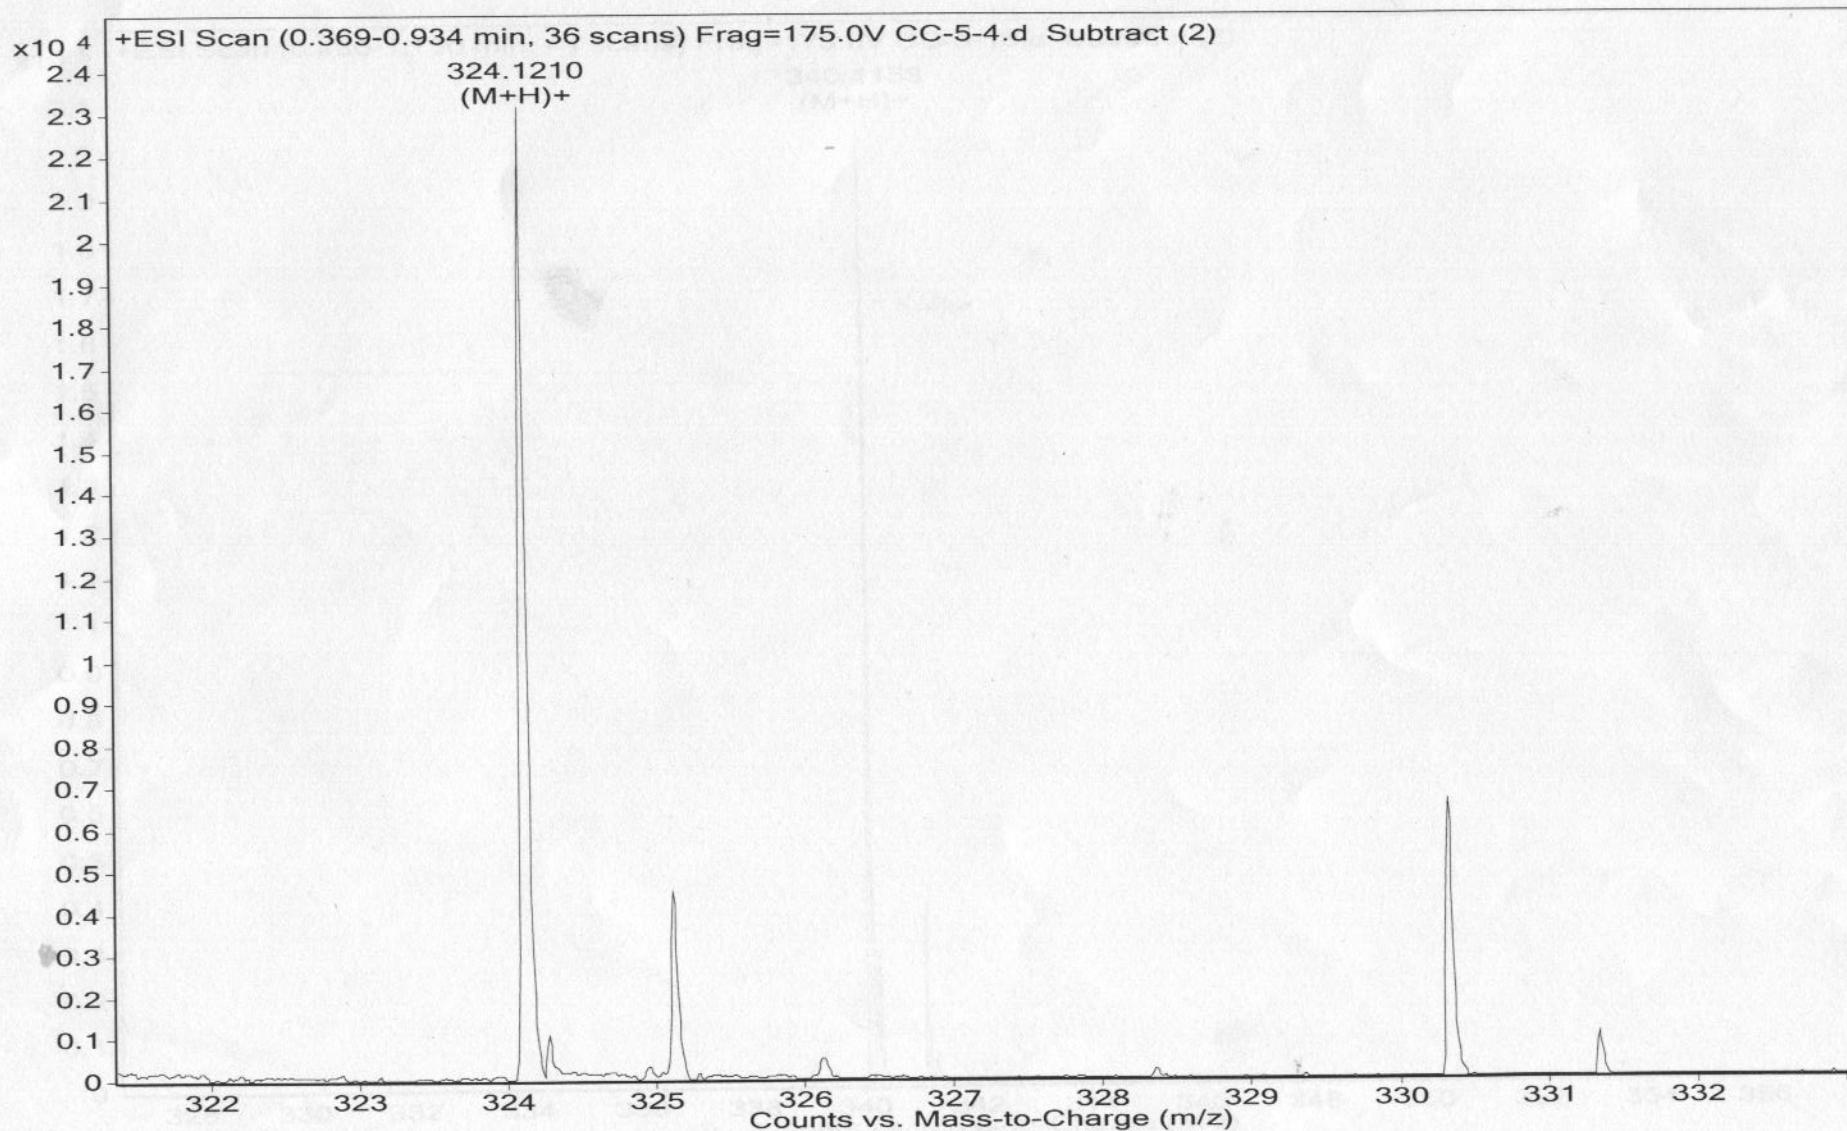

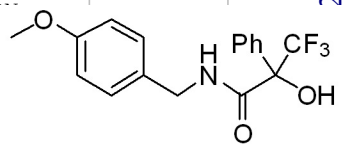

Chemical Formula: C<sub>17</sub>H<sub>16</sub>F<sub>3</sub>NO<sub>3</sub>  
Exact Mass: 339.1082

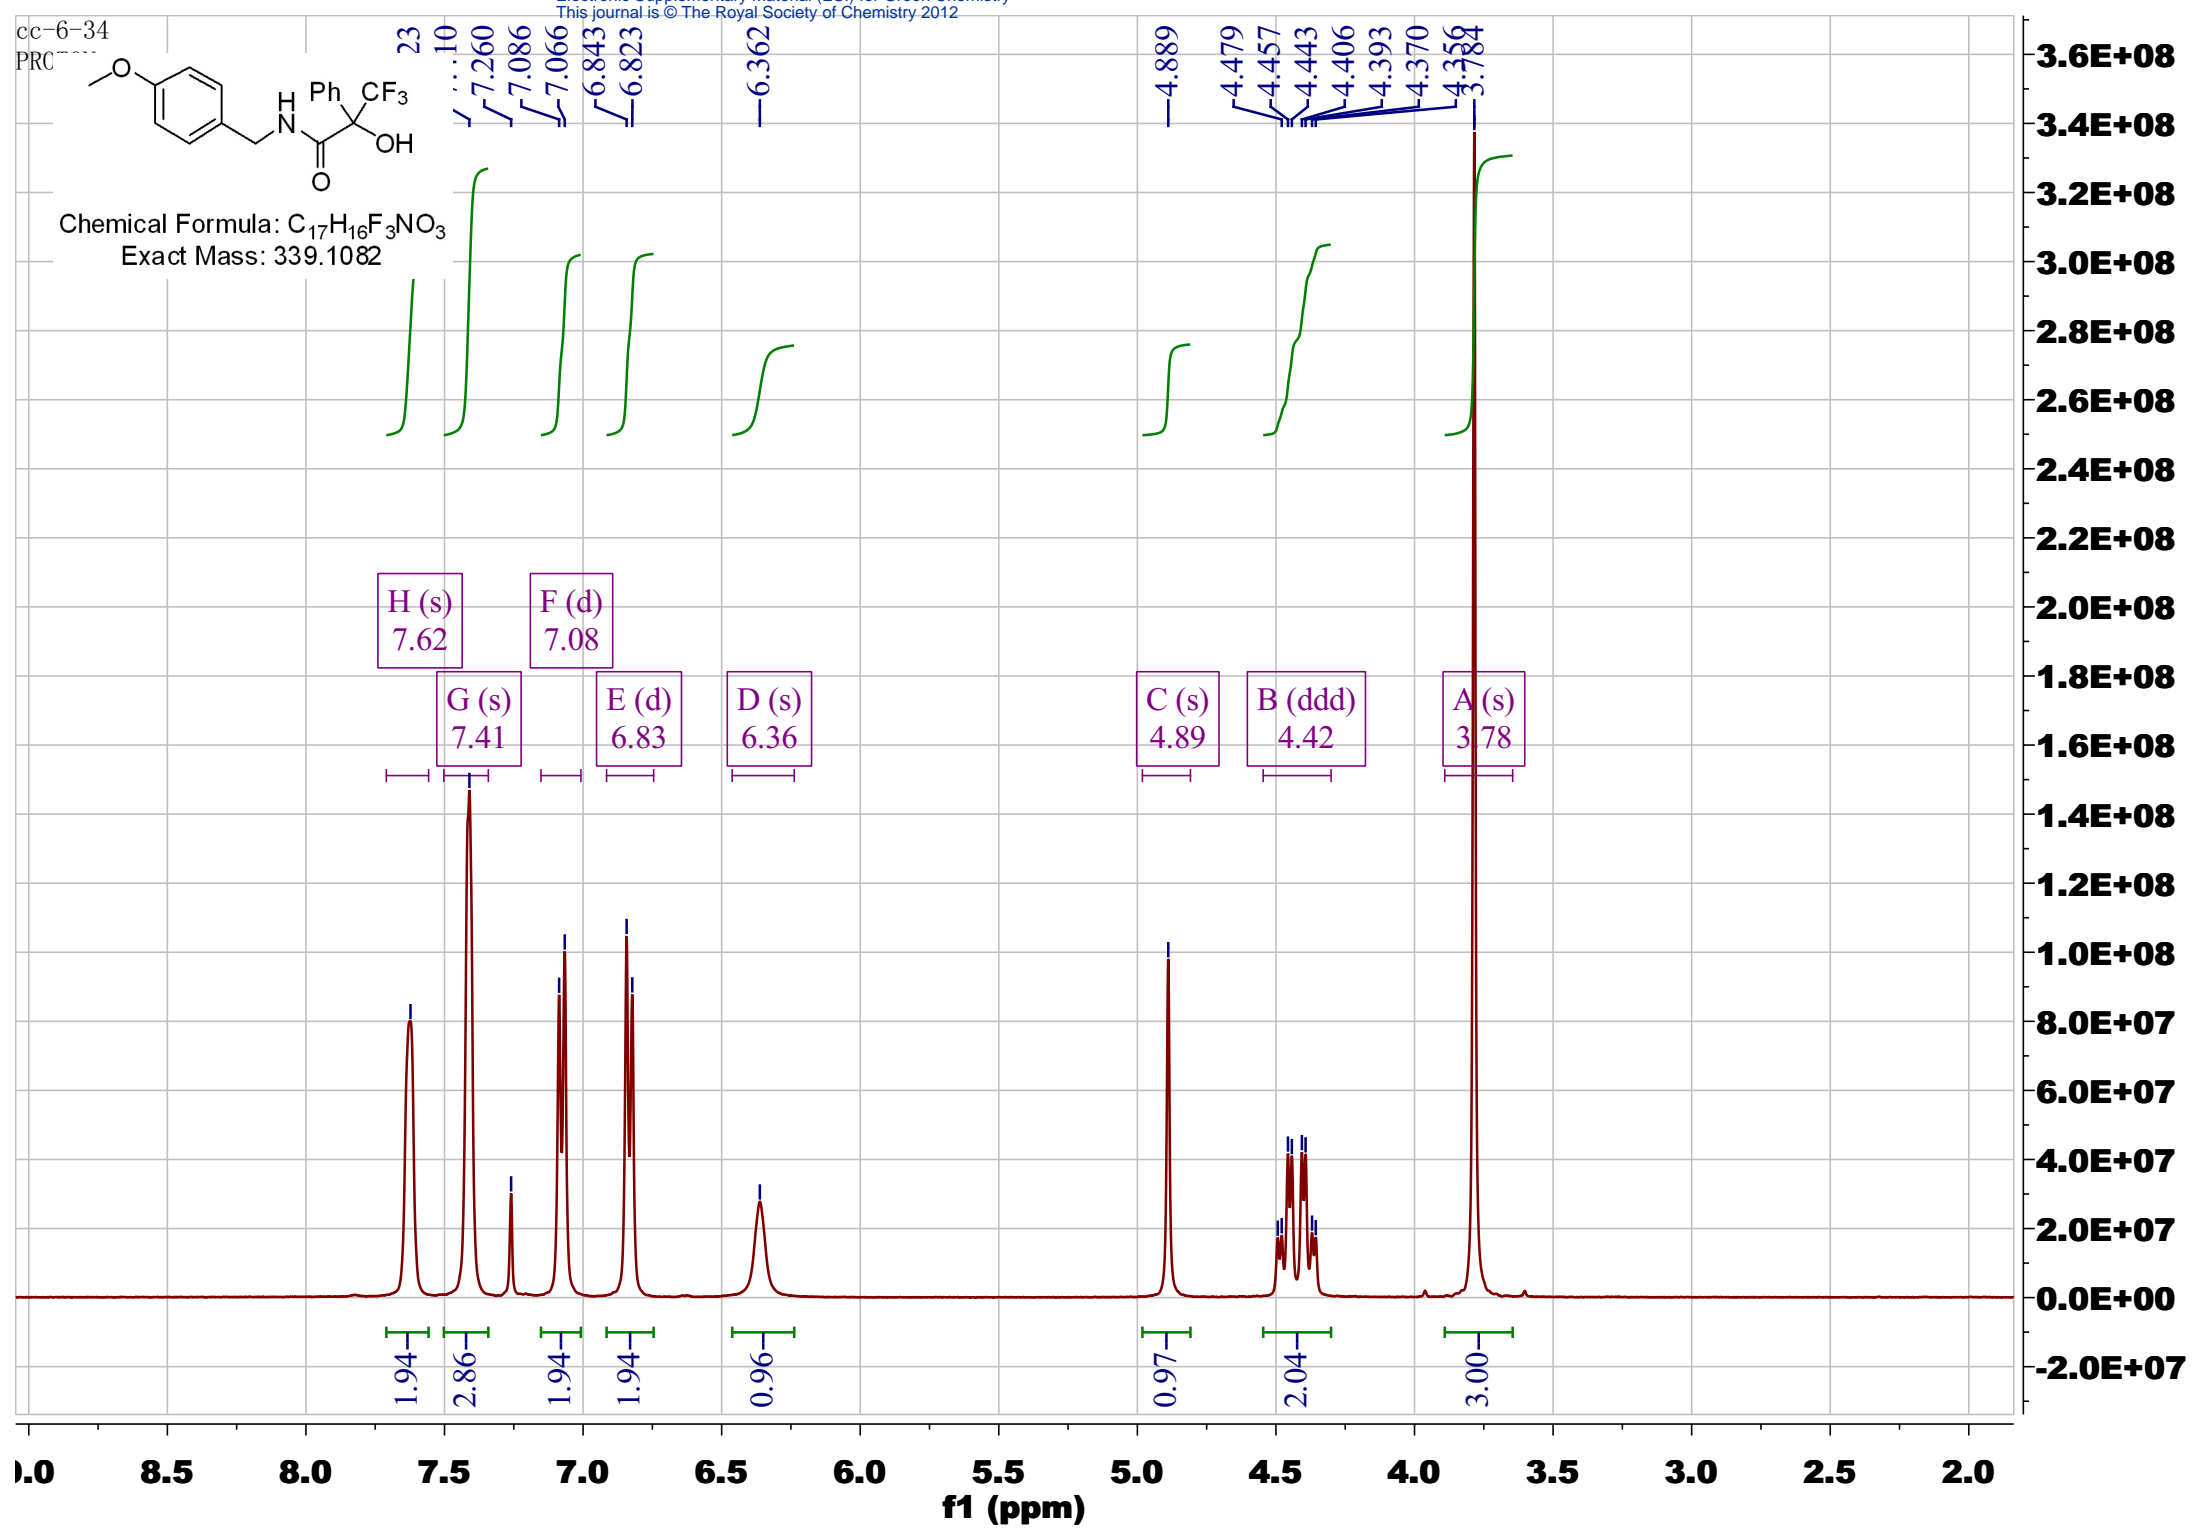



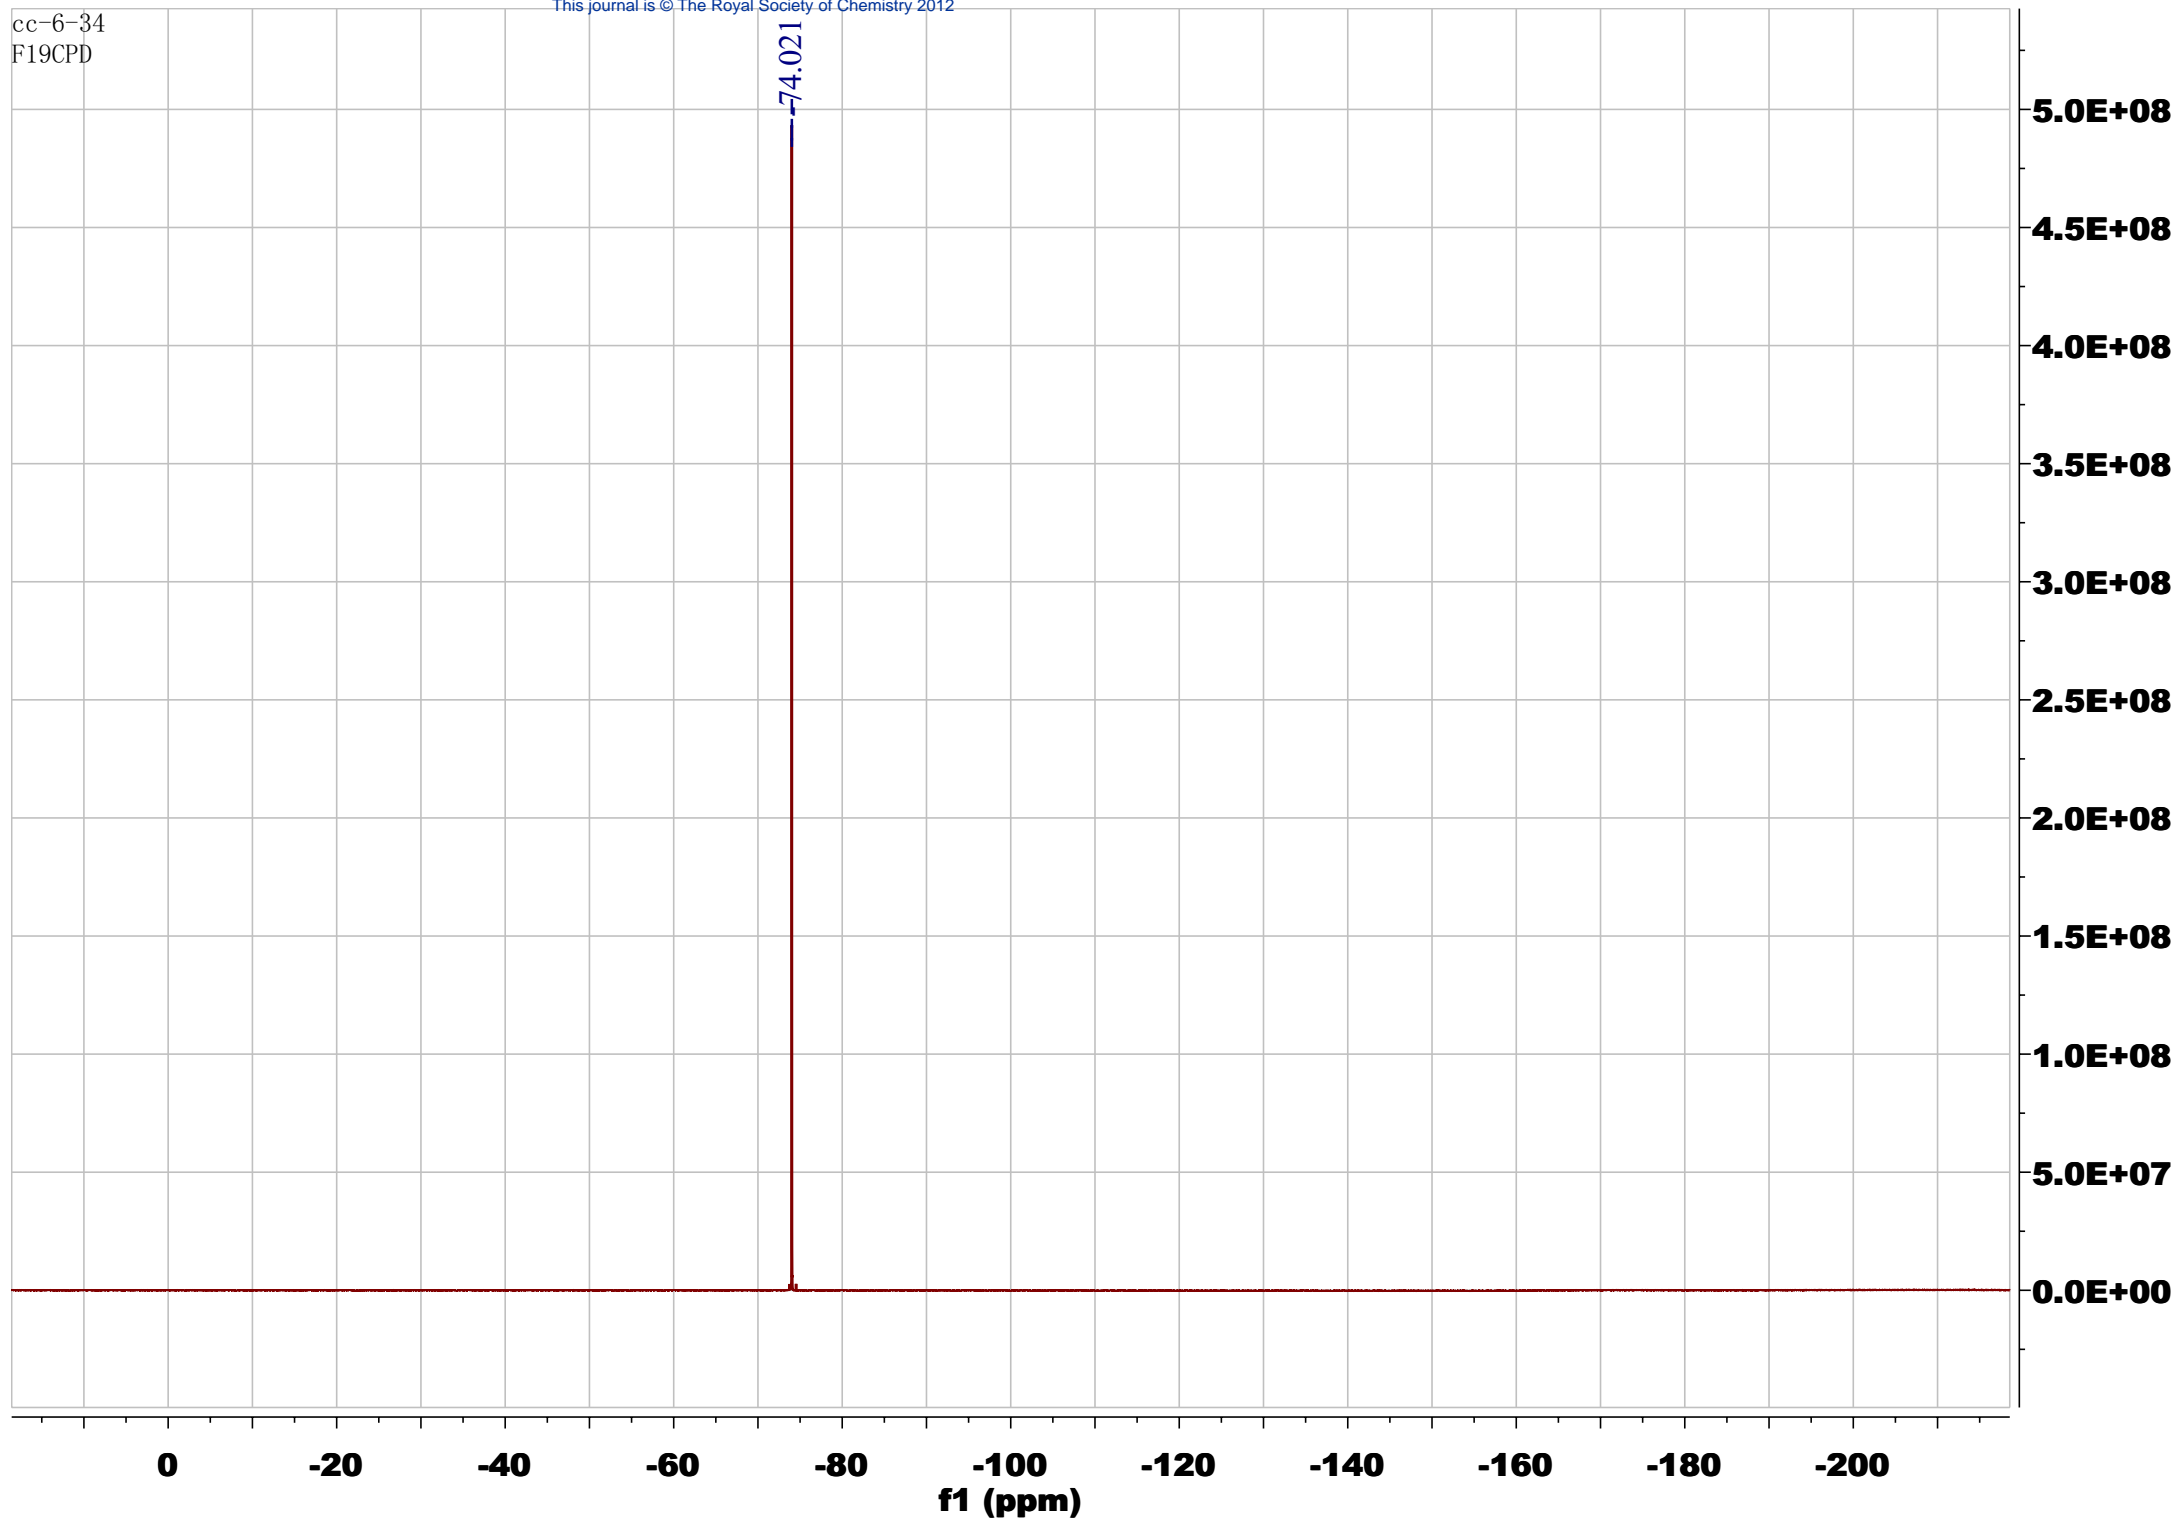

<sup>13</sup>C NMR (101 MHz, CDCl<sub>3</sub>) δ 167.10, 159.26, 134.37, 129.58, 128.96, 128.88, 128.71, 126.52, 125.36, 122.19, 114.21, 55.31, 44.02.

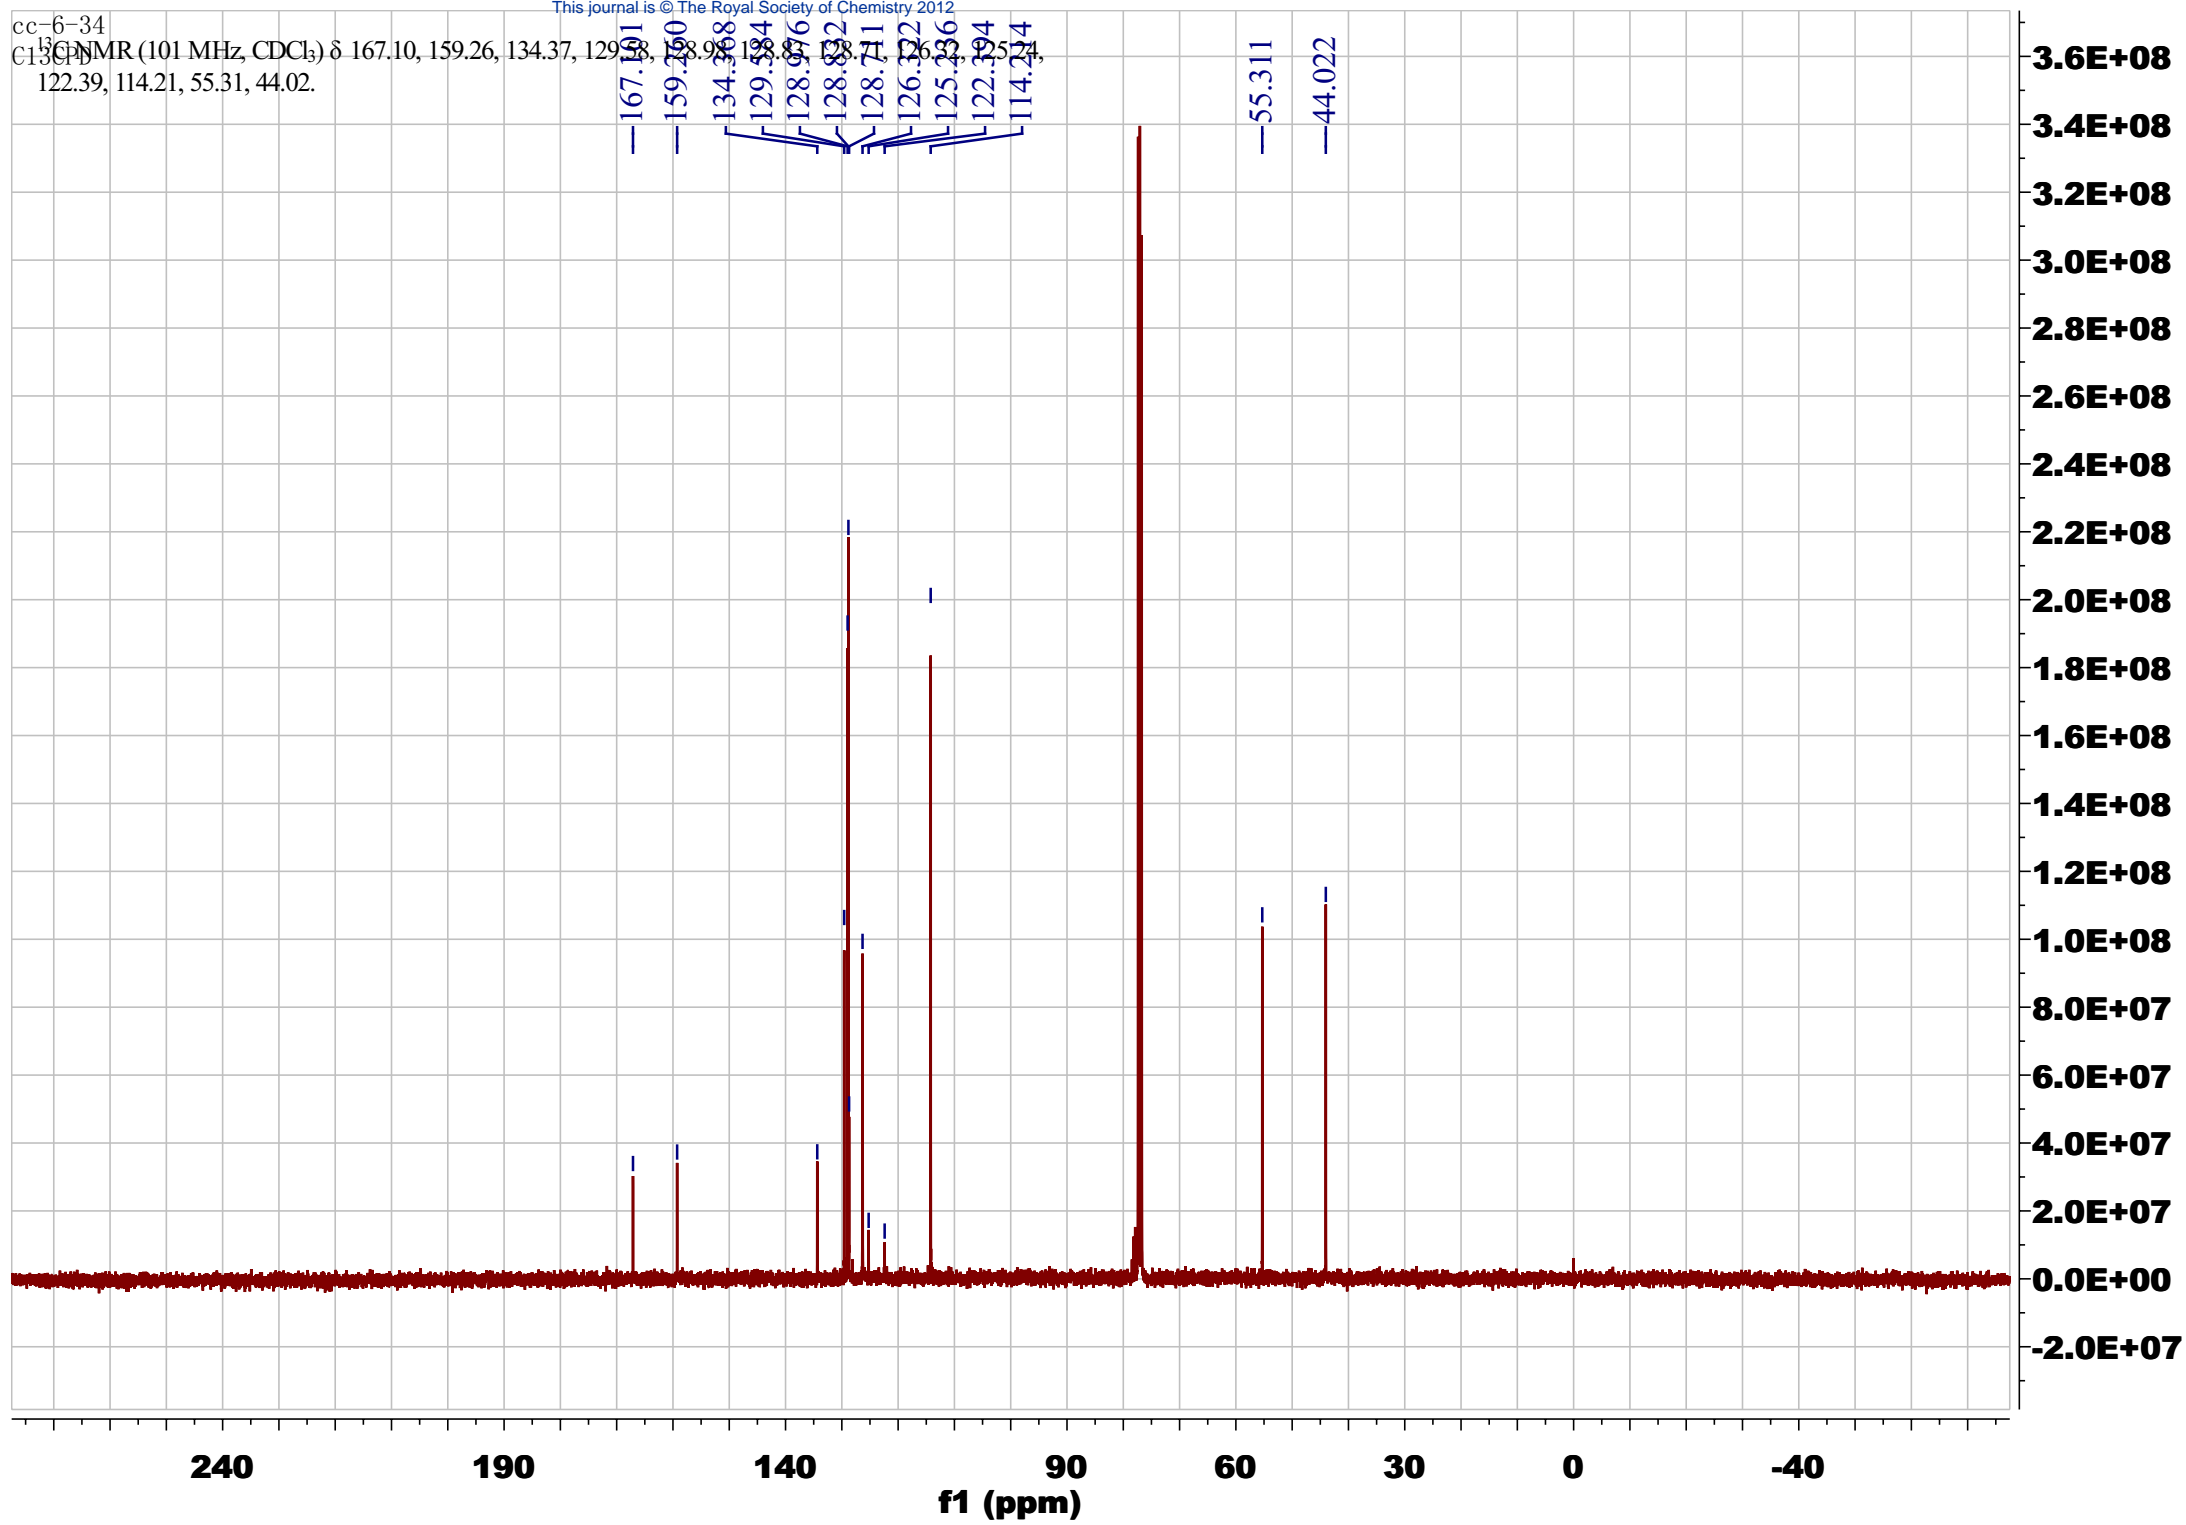

340.1155

|                      |                |                    |           |                        |                      |                               |                       |
|----------------------|----------------|--------------------|-----------|------------------------|----------------------|-------------------------------|-----------------------|
| <b>Sample Name</b>   | lc/ms          | <b>Position</b>    | Vial 3    | <b>Instrument Name</b> | Agilent_G6520_QTOF_L | <b>User Name</b>              | Agilent FSE           |
| <b>Inj Vol</b>       | 1              | <b>InjPosition</b> |           | <b>SampleType</b>      | Sample               | <b>IRM Calibration Status</b> | Some Ions Missed      |
| <b>Data Filename</b> | CC-5-18.d (6C) | <b>ACQ Method</b>  | chen-ms.m | <b>Comment</b>         |                      | <b>Acquired Time</b>          | 4/19/2012 11:28:12 AM |

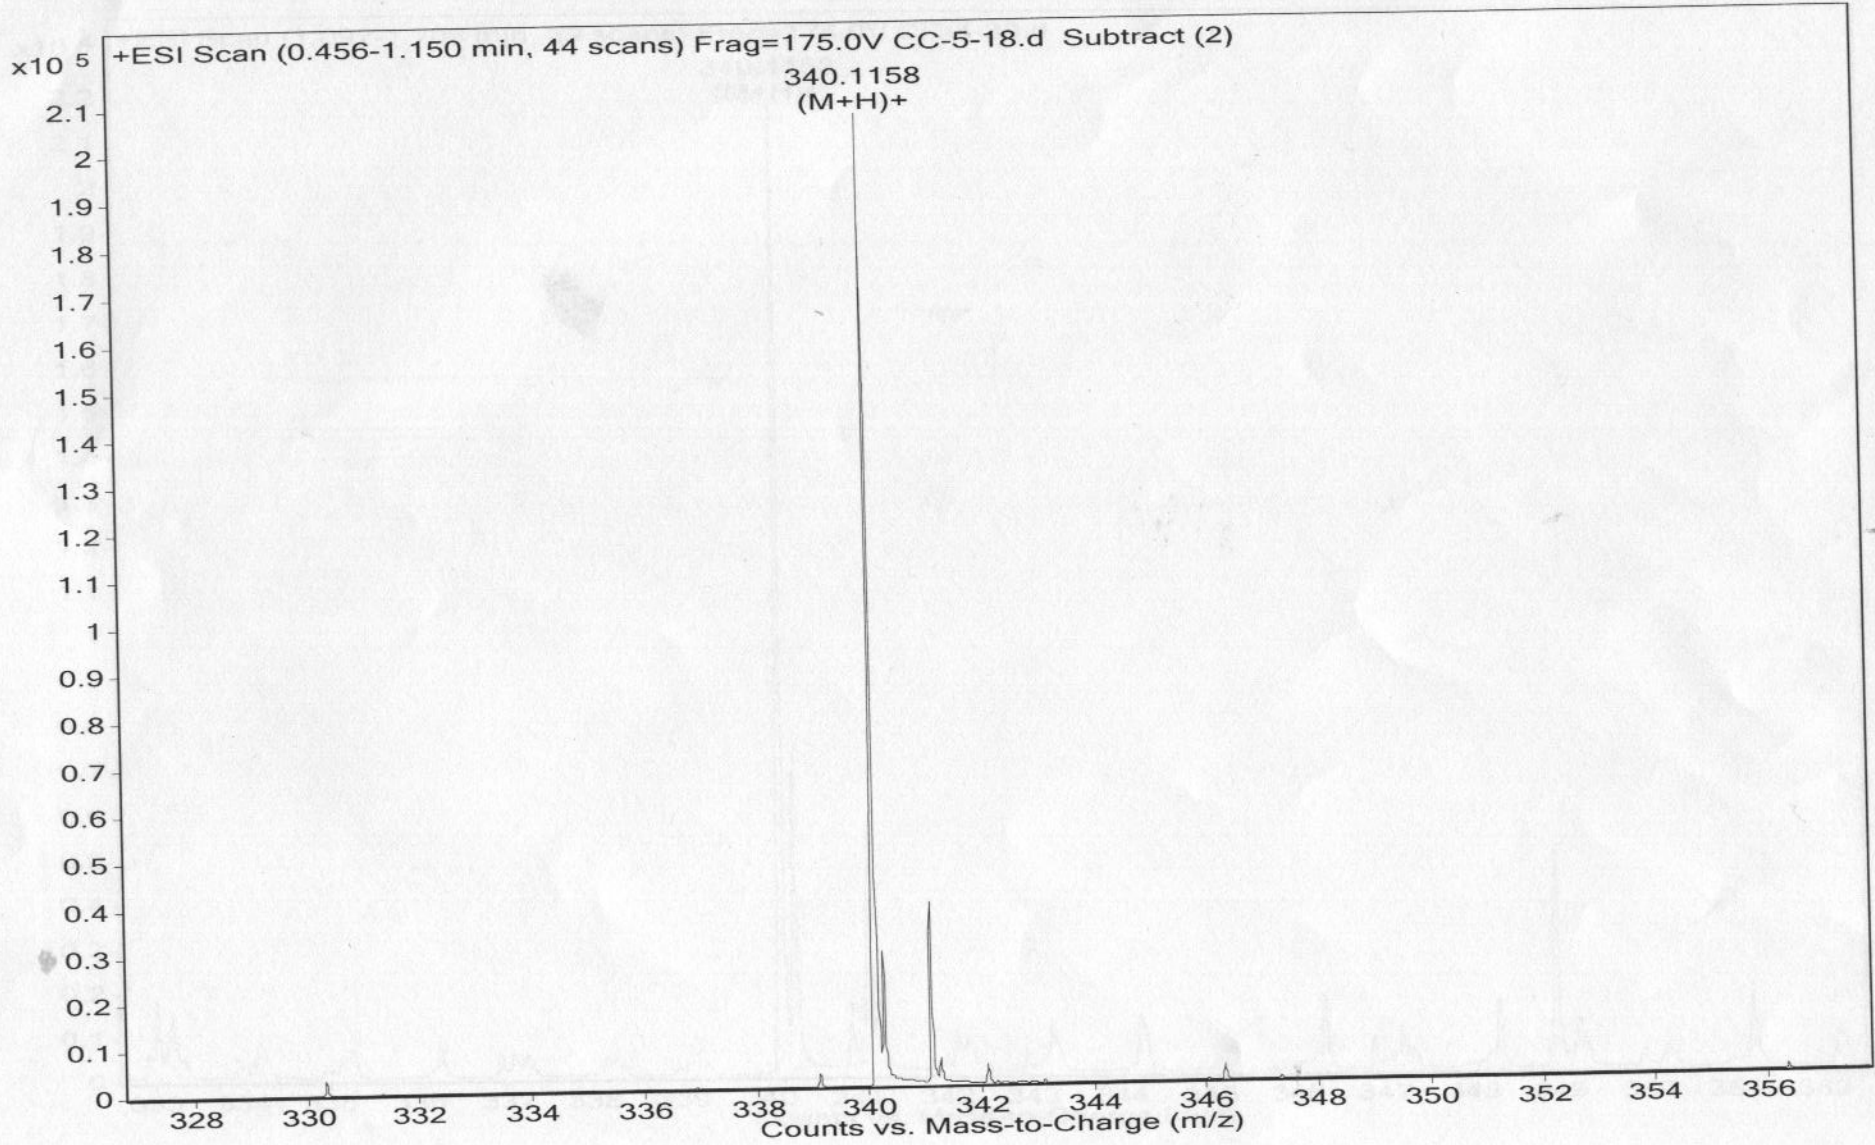

<sup>1</sup>H NMR (400 MHz, CDCl<sub>3</sub>) δ 7.64 (d, *J* = 3.8 Hz, 2H), 7.55 (d, *J* = 7.3 Hz, 2H), 7.37 (m, 2H), 7.37 (d, *J* = 6.8 Hz, 2H), 6.41 (s, 1H), 4.85 (s, 1H), 4.51 (dd, *J* = 3.8, 1.5 Hz, 2H), 4.46 (dd, *J* = 5.8 Hz, 2H).

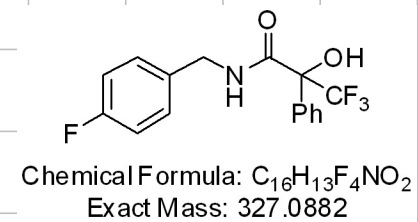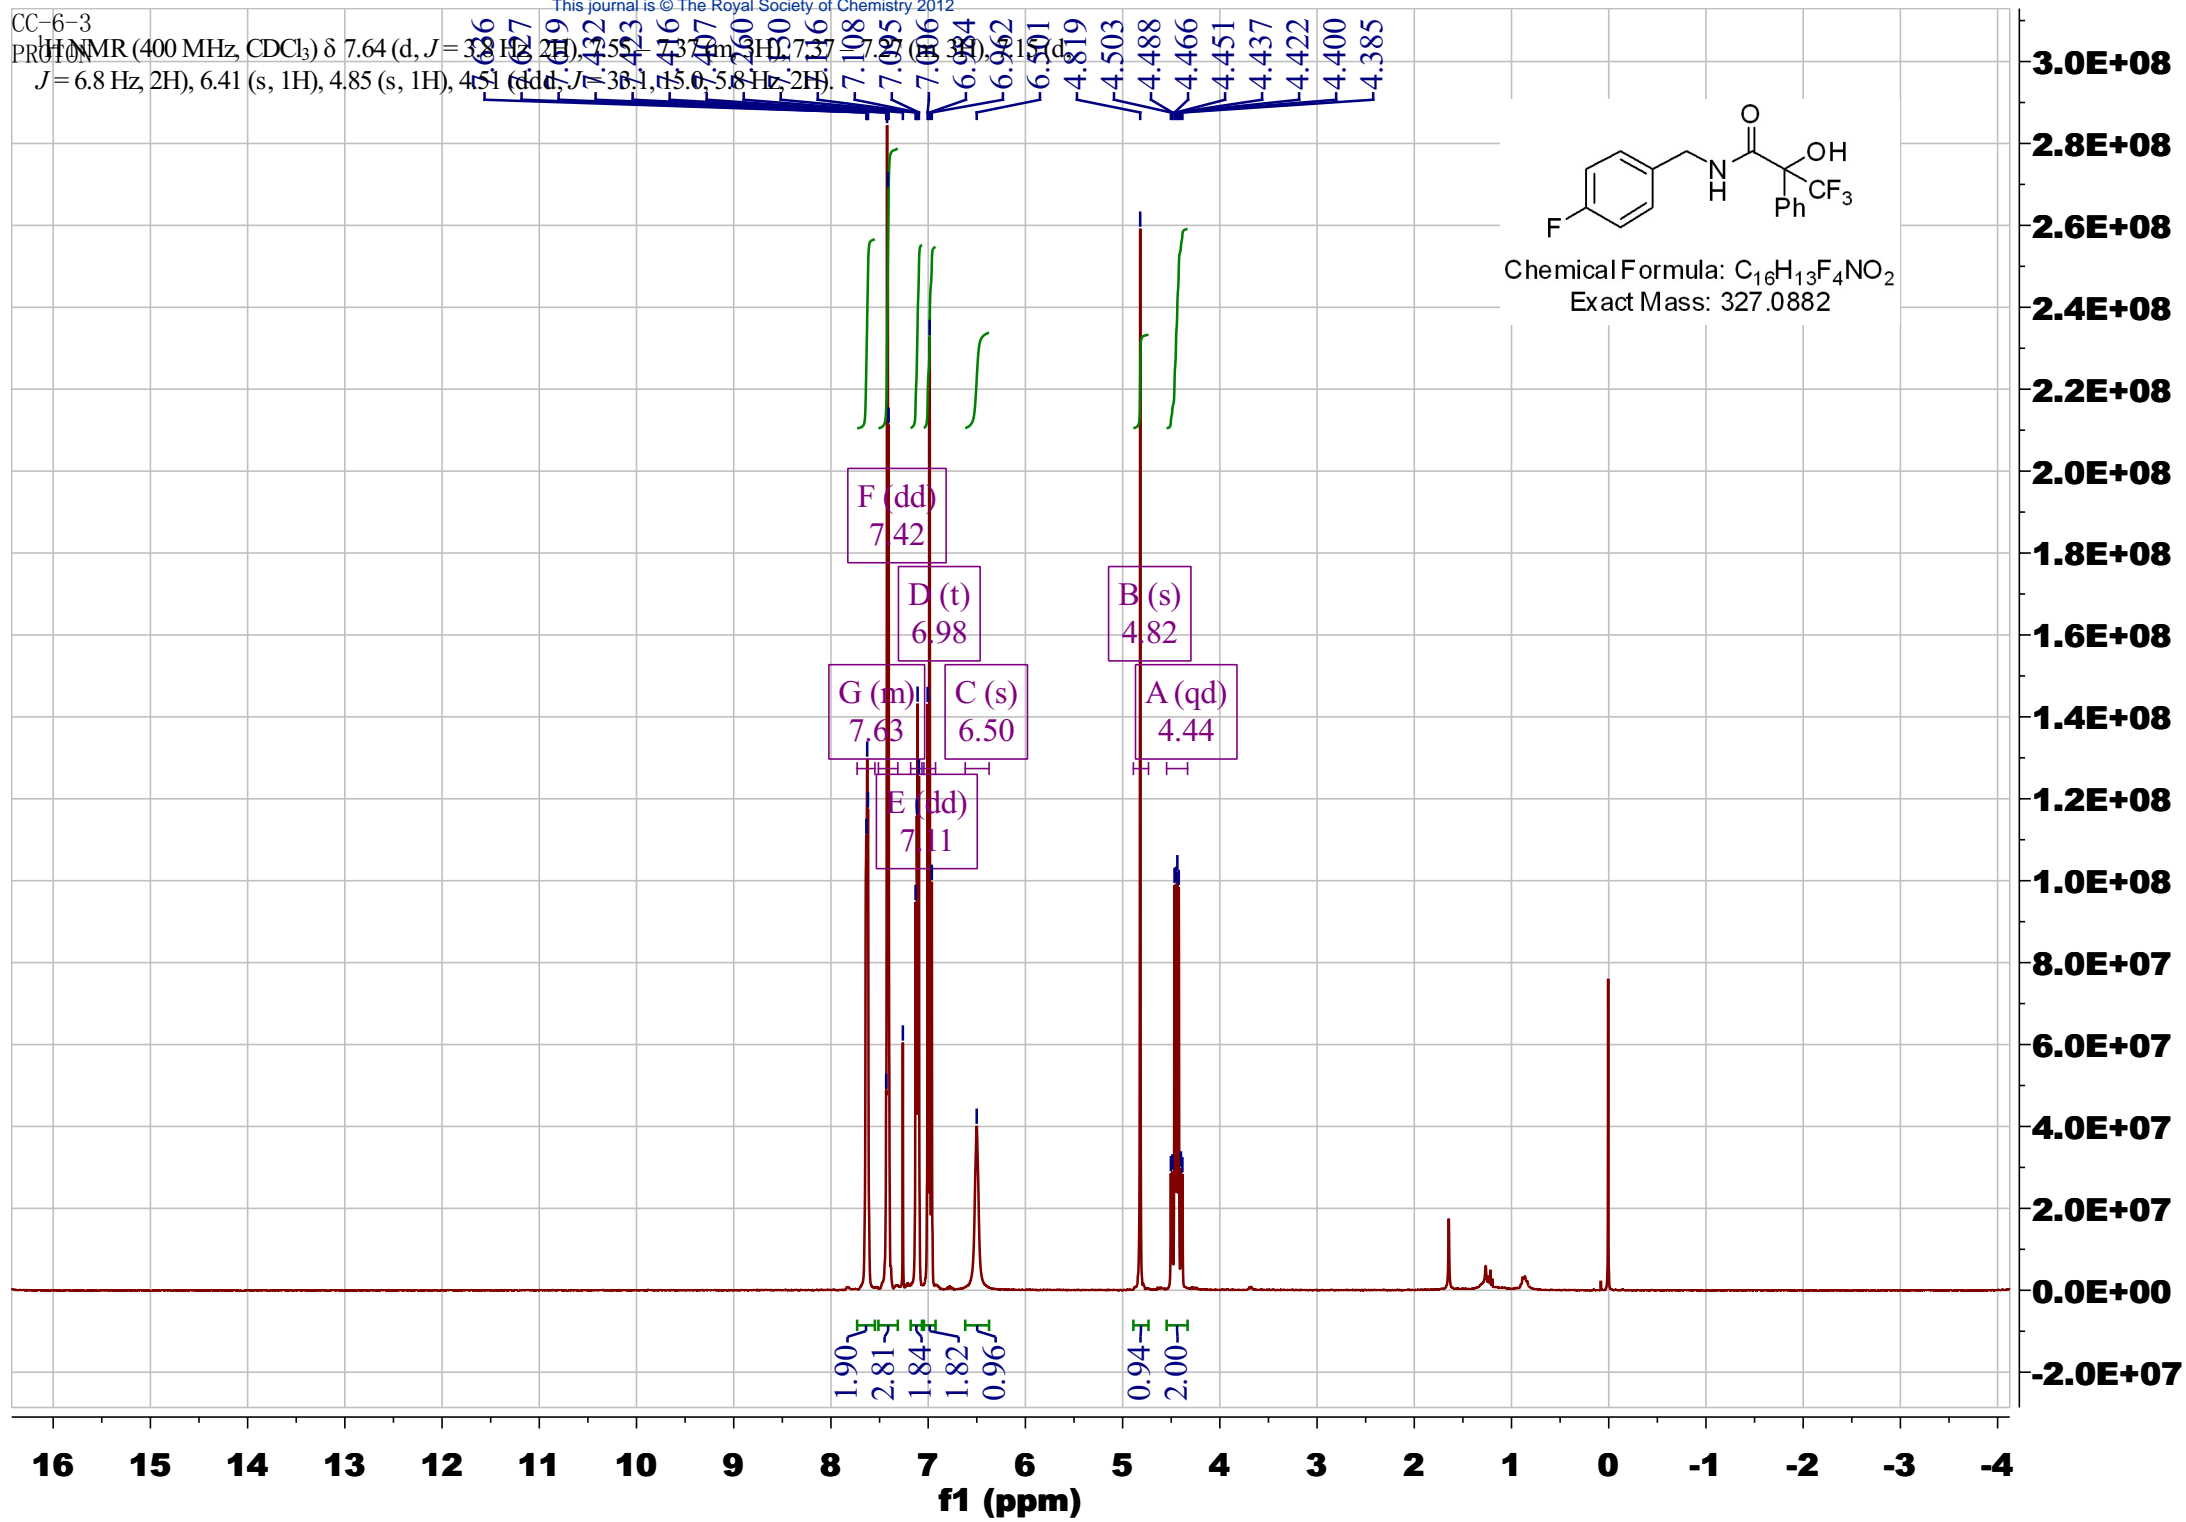

CC-6-3  
F19F NMR (376 MHz, CDCl<sub>3</sub>) δ -74.10, -114.29.

Electronic Supplementary Material (ESI) for Green Chemistry  
This journal is © The Royal Society of Chemistry 2012

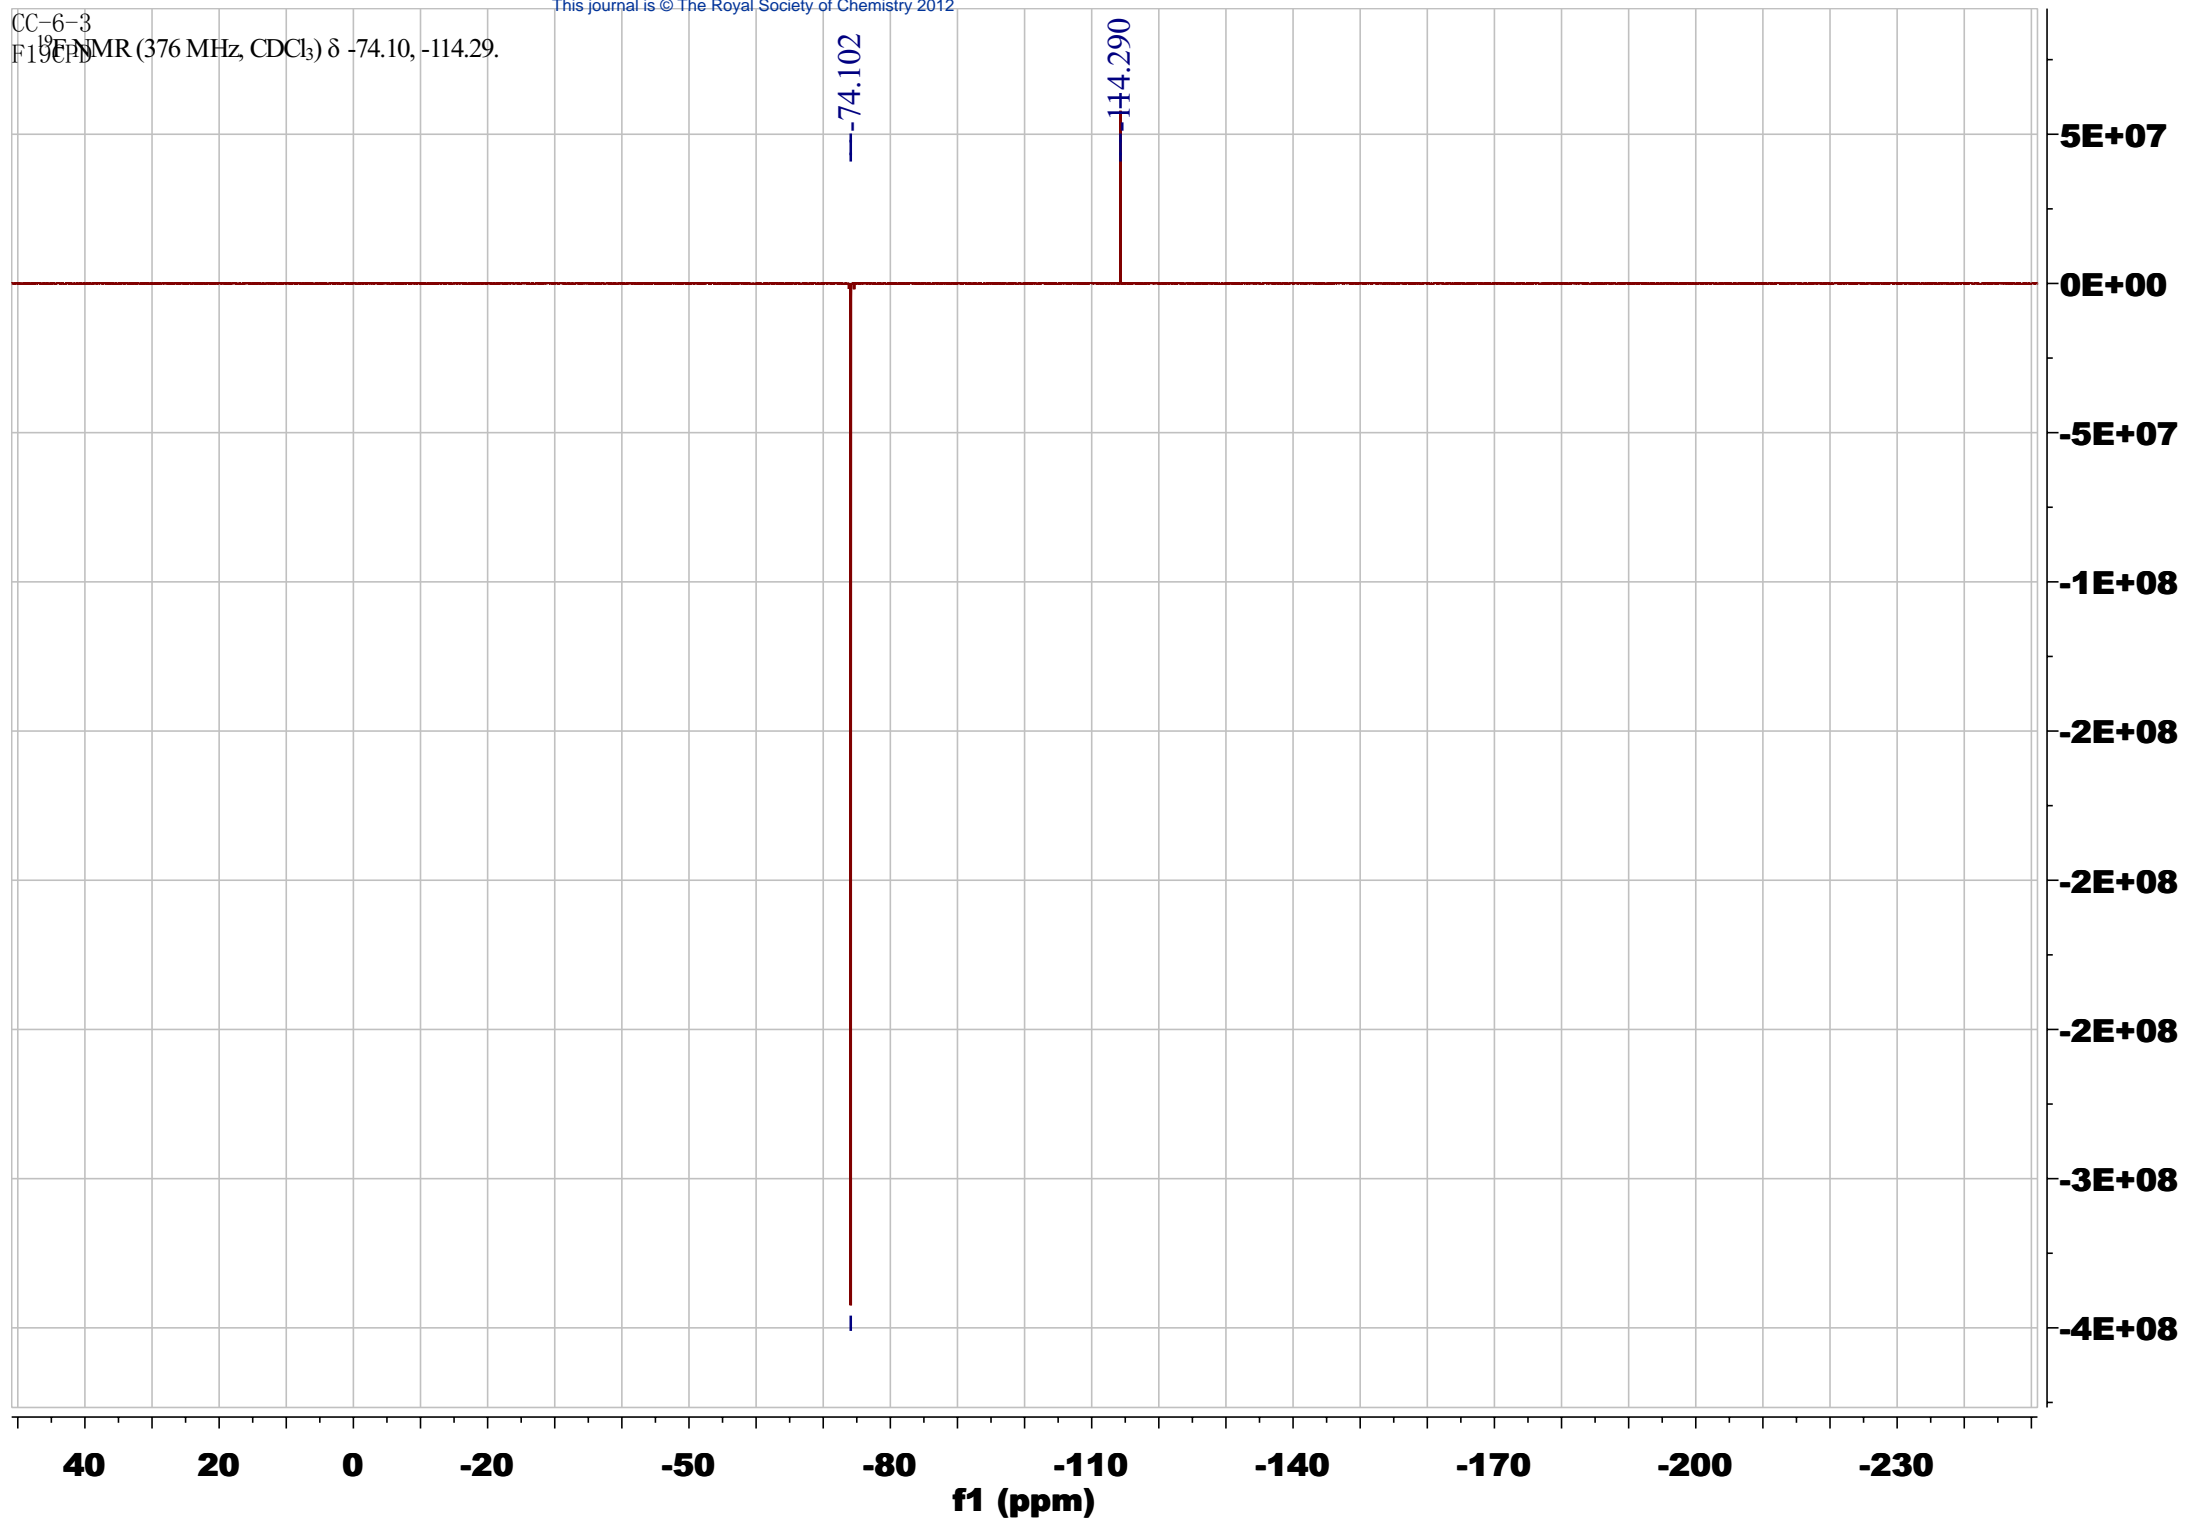

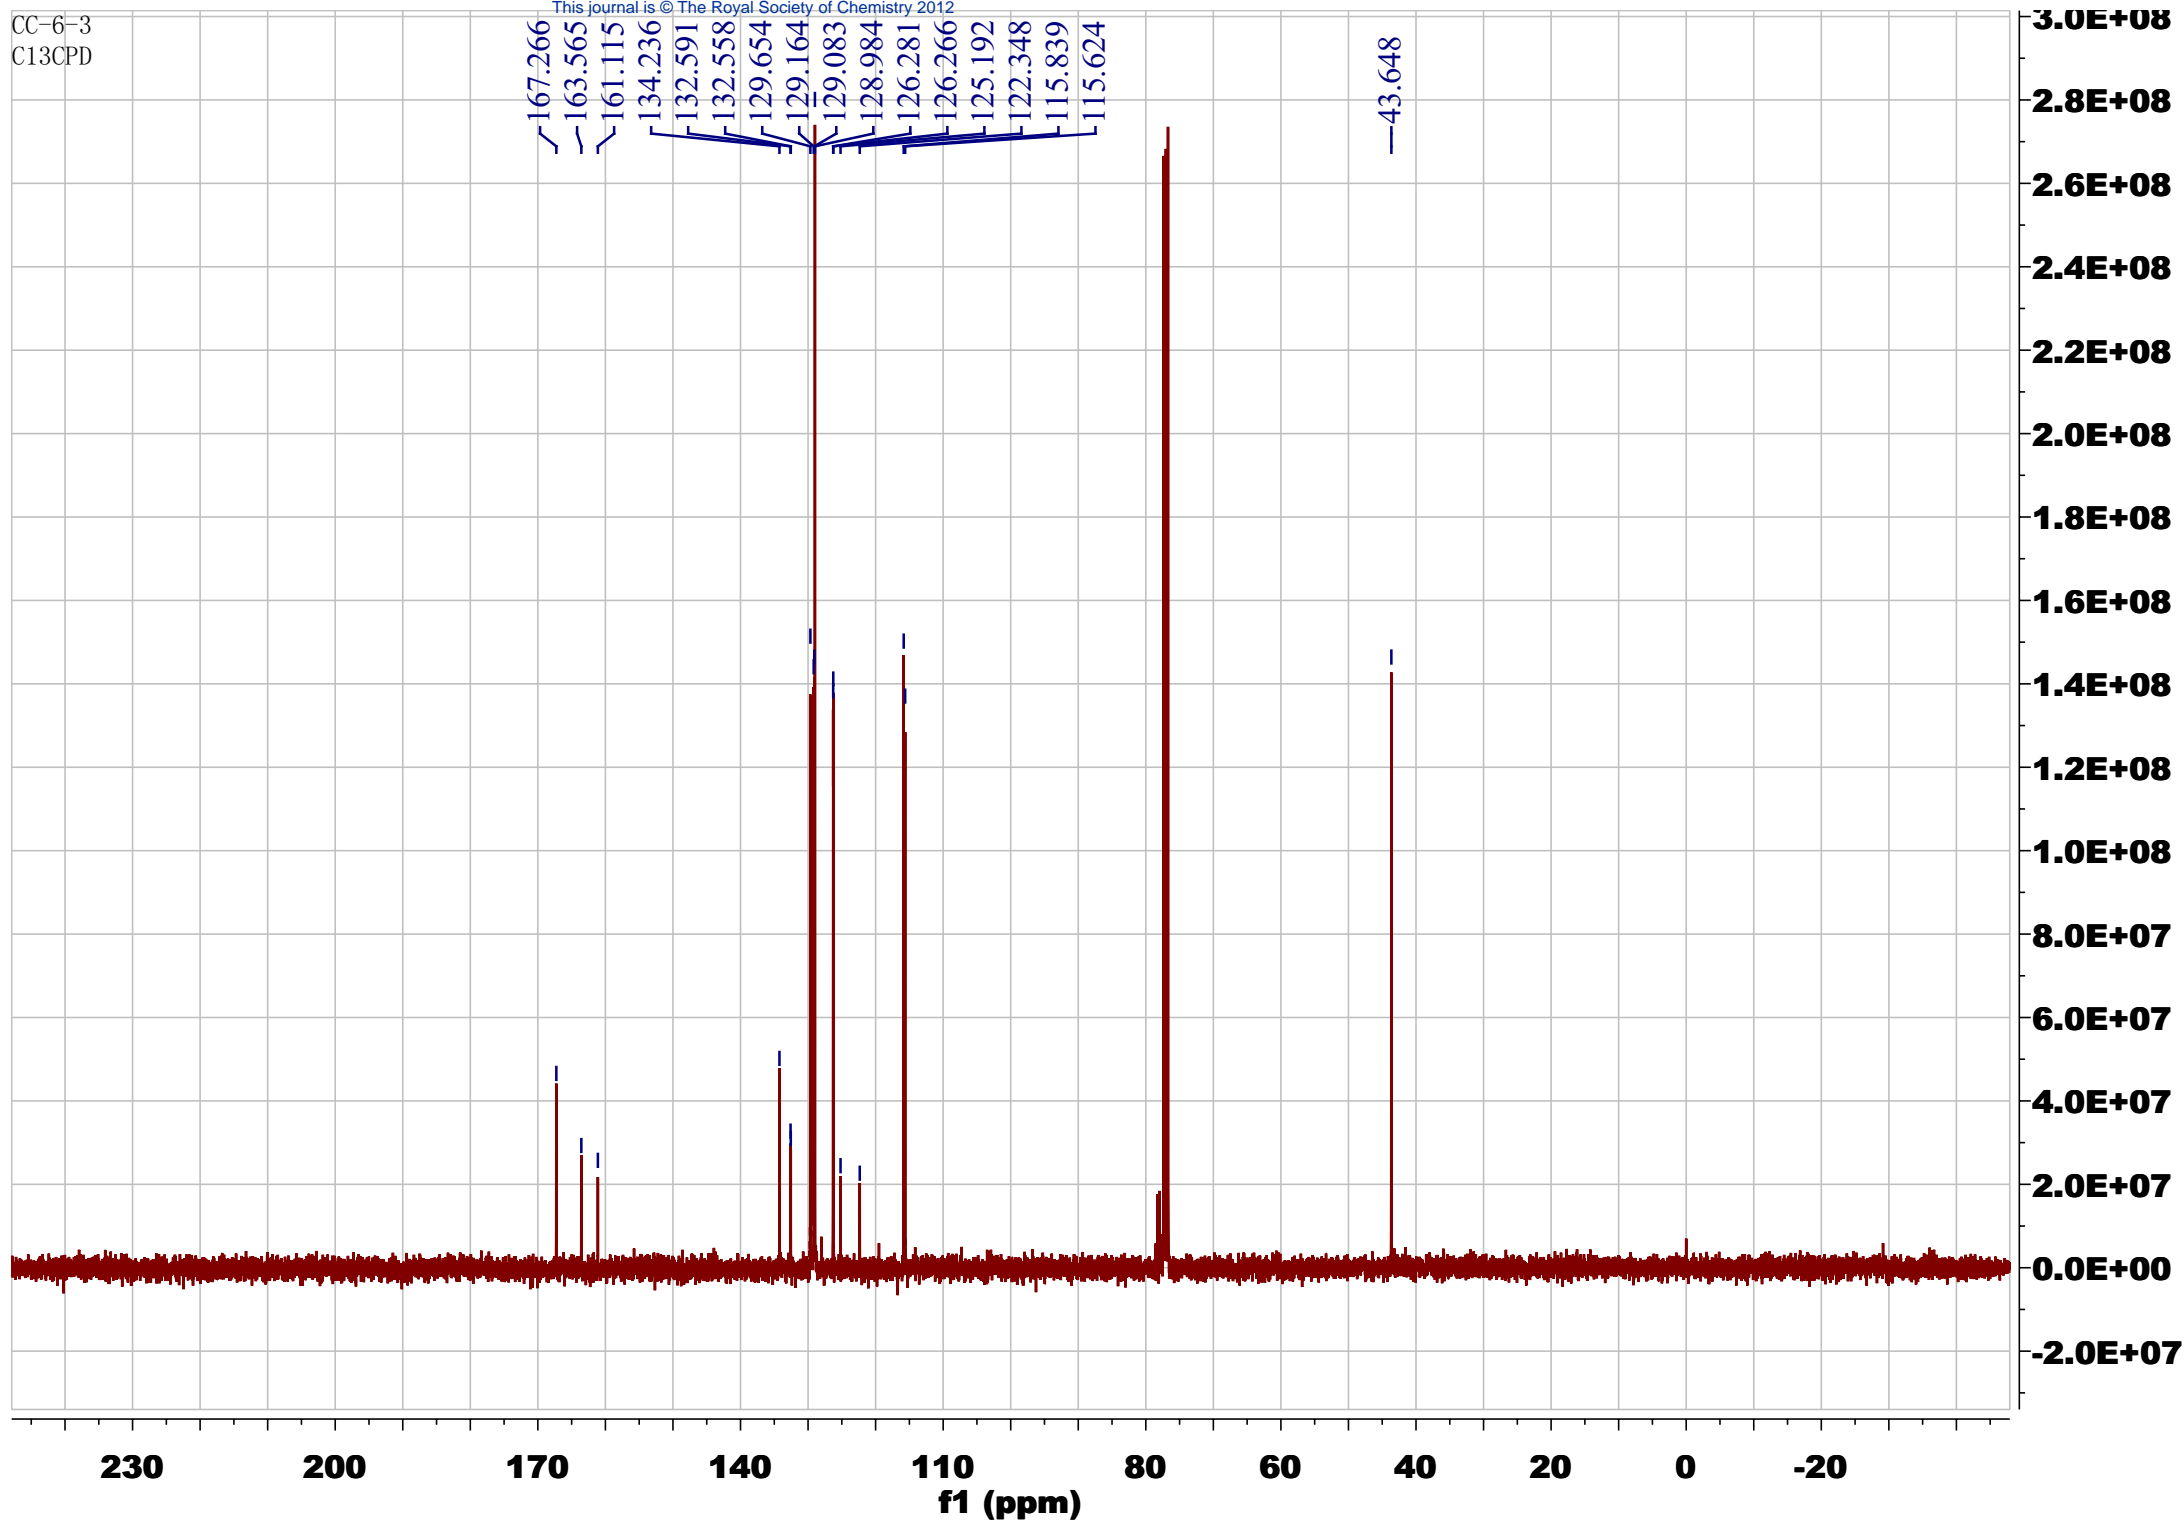

340.1155

|               |                |             |           |                 |                      |                        |                       |
|---------------|----------------|-------------|-----------|-----------------|----------------------|------------------------|-----------------------|
| Sample Name   | lc/ms          | Position    | Vial 4    | Instrument Name | Agilent_G6520_QTOF_L | User Name              | Agilent FSE           |
| Inj Vol       | 1              | InjPosition |           | SampleType      | Sample               | IRM Calibration Status | Some Ions Missed      |
| Data Filename | CC-4-39.d (6d) | ACQ Method  | chen-ms.m | Comment         |                      | Acquired Time          | 4/19/2012 11:31:53 AM |

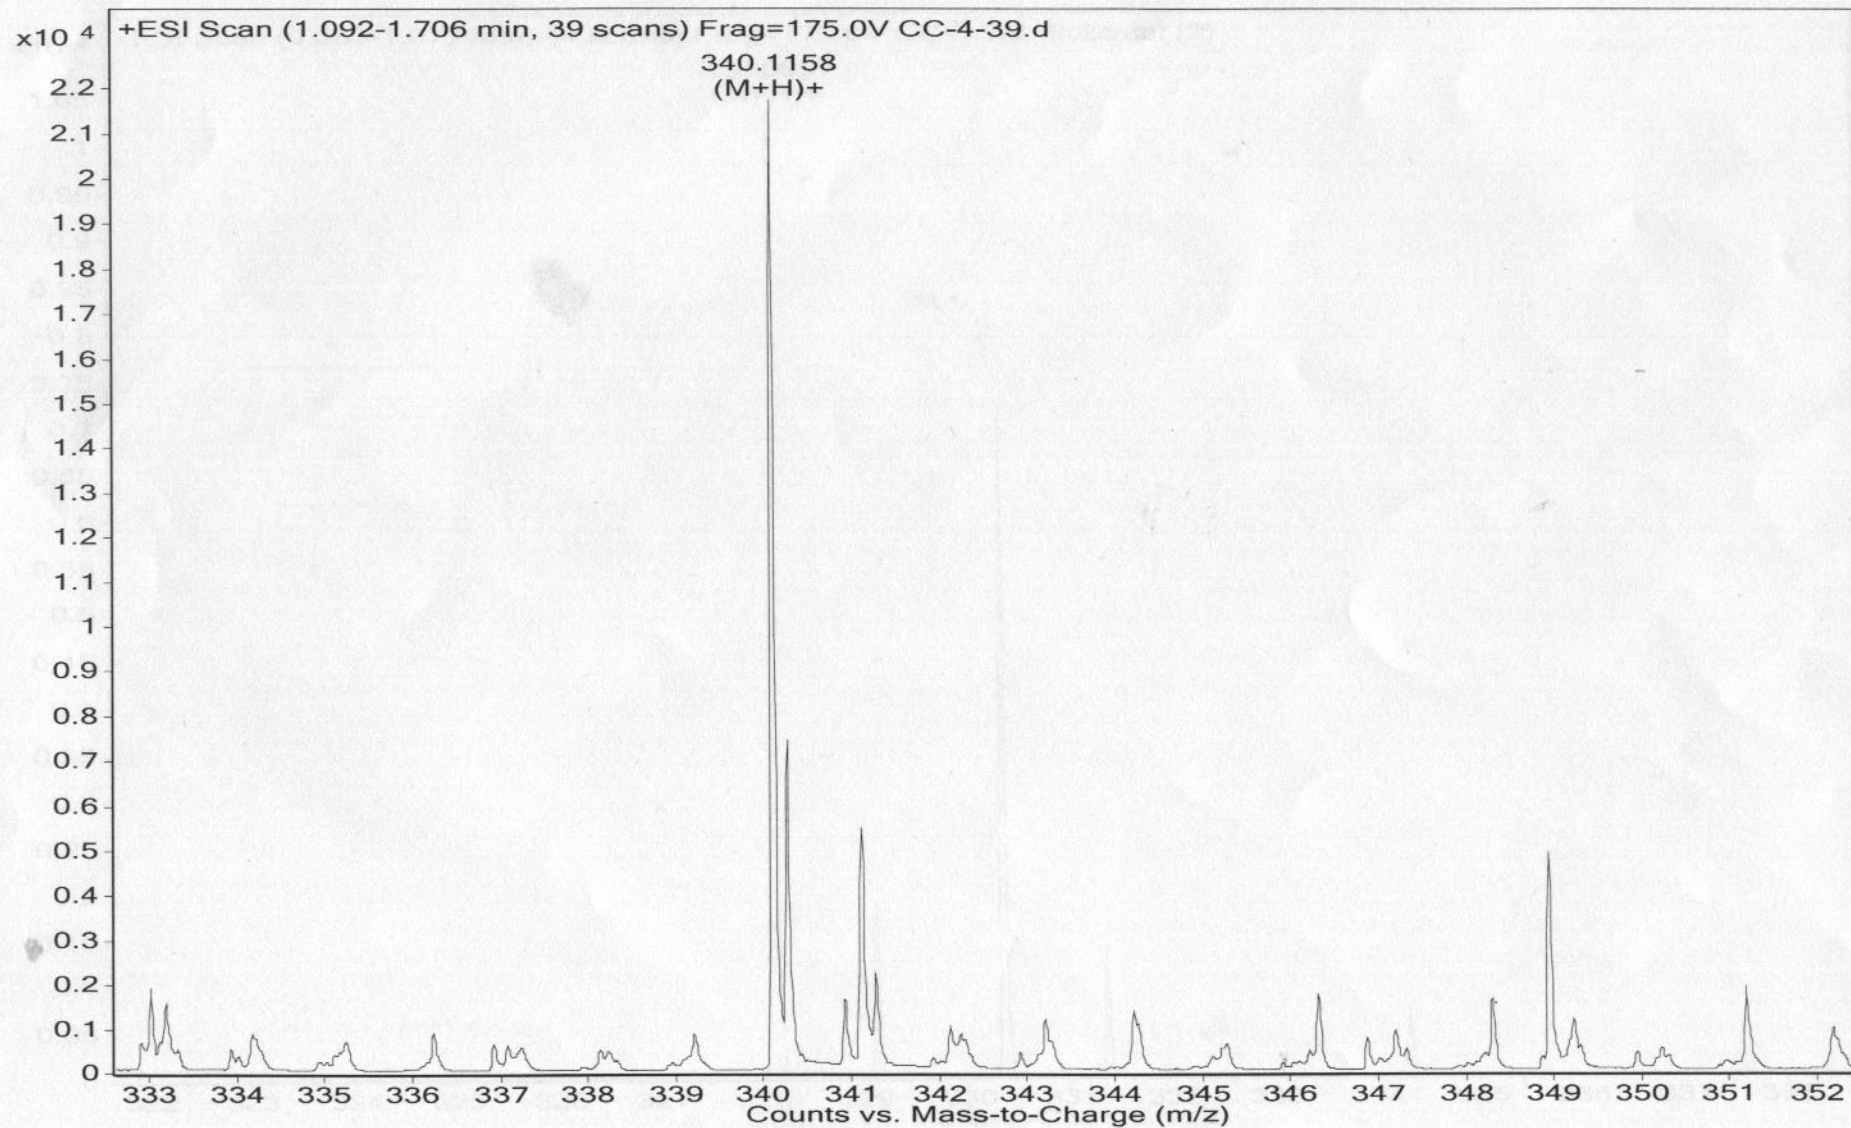

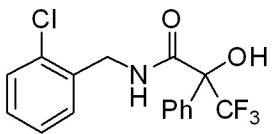

Chemical Formula: C<sub>16</sub>H<sub>13</sub>ClF<sub>3</sub>NO<sub>2</sub>  
Exact Mass: 343.0587

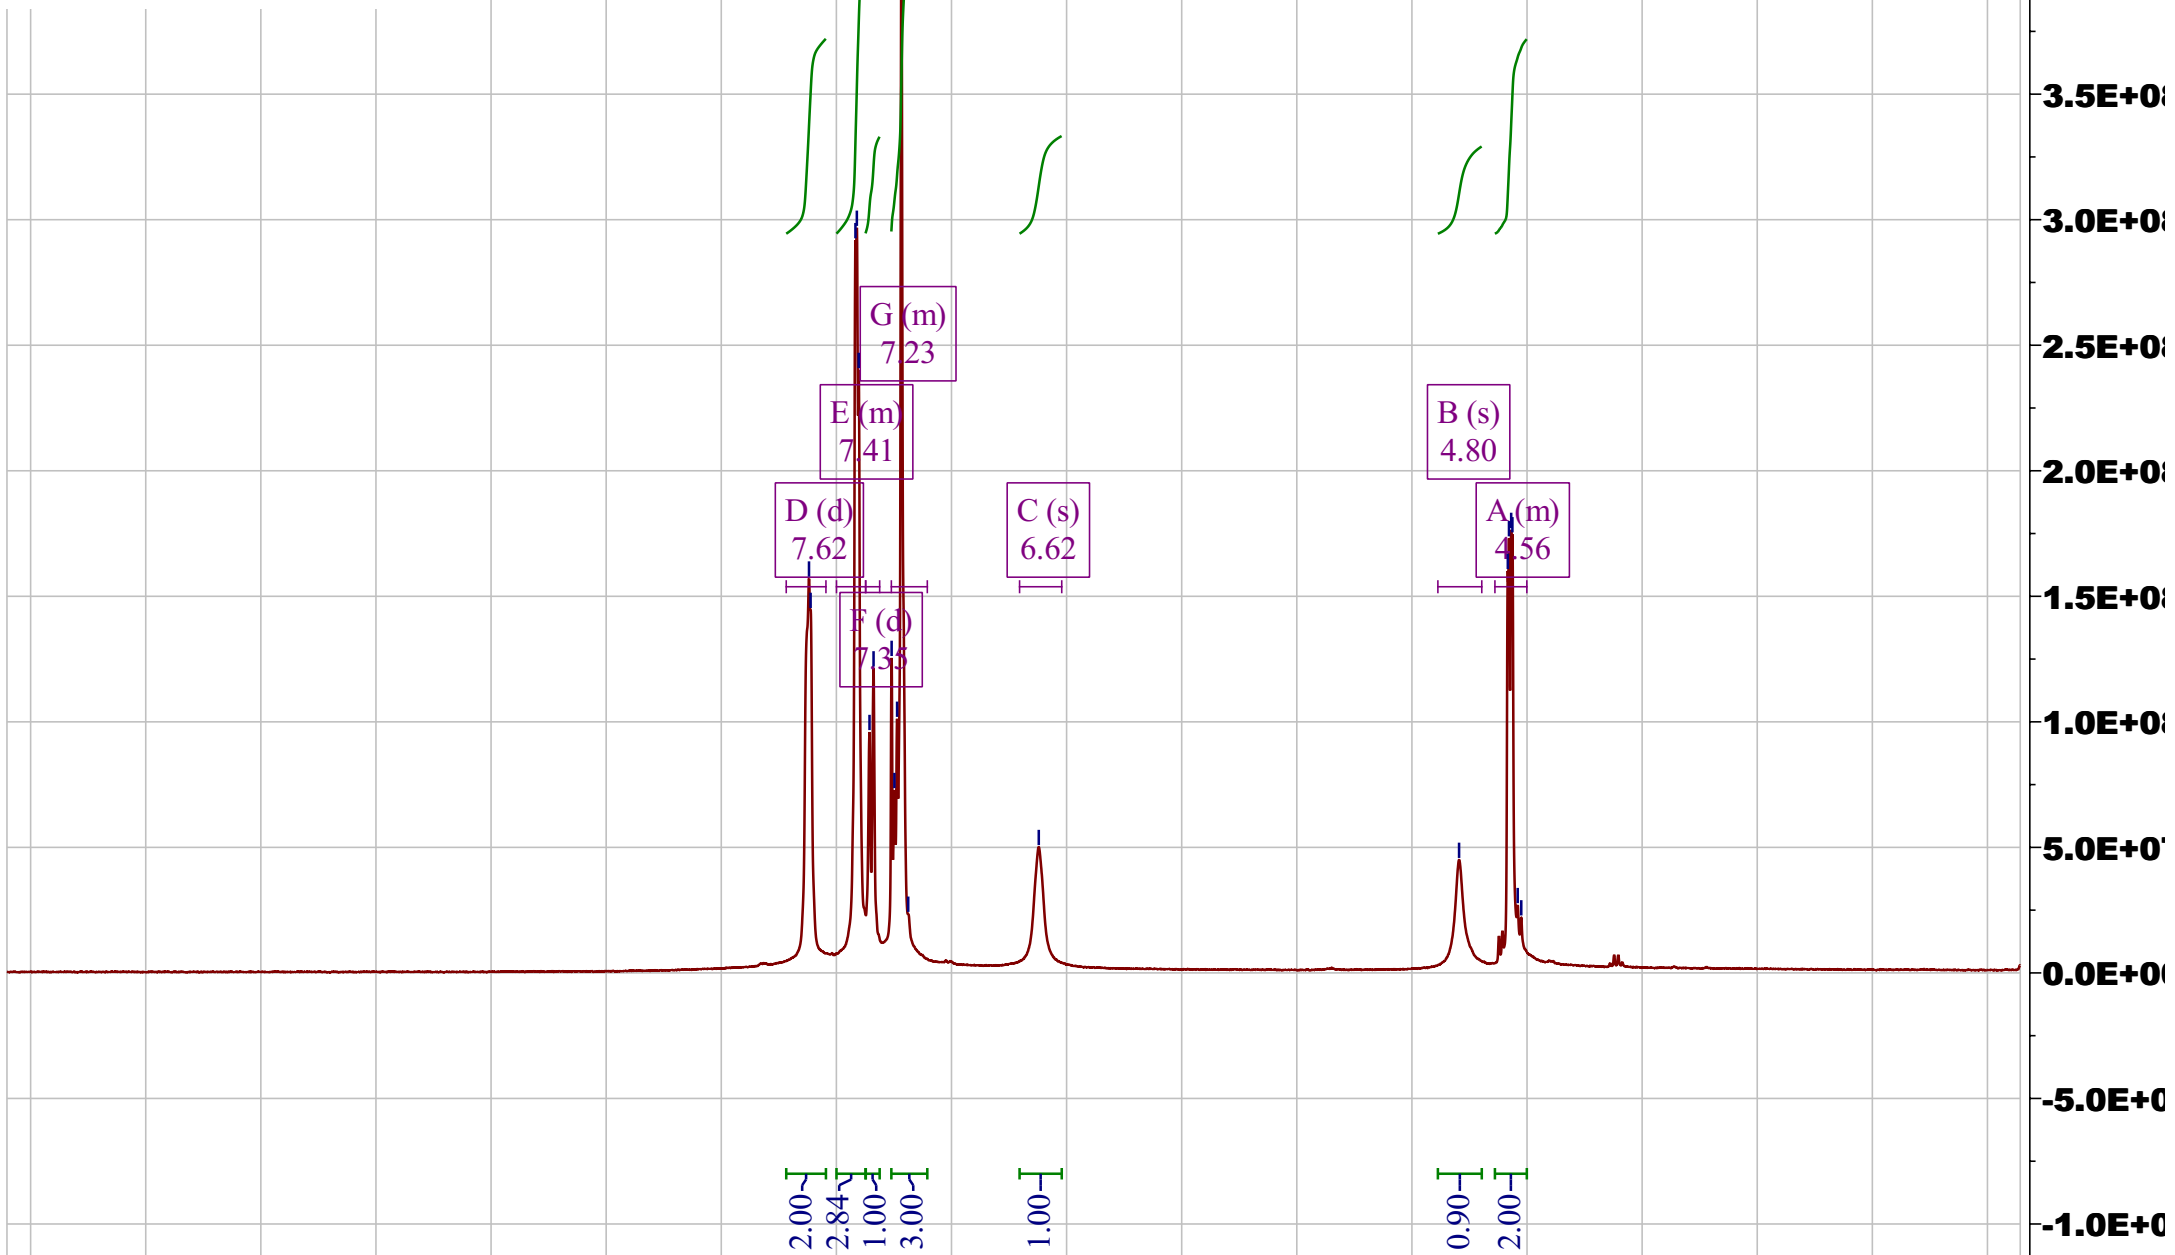



F19CPD  
Unknown NMR (376 MHz, )  $\delta$  -74.11.

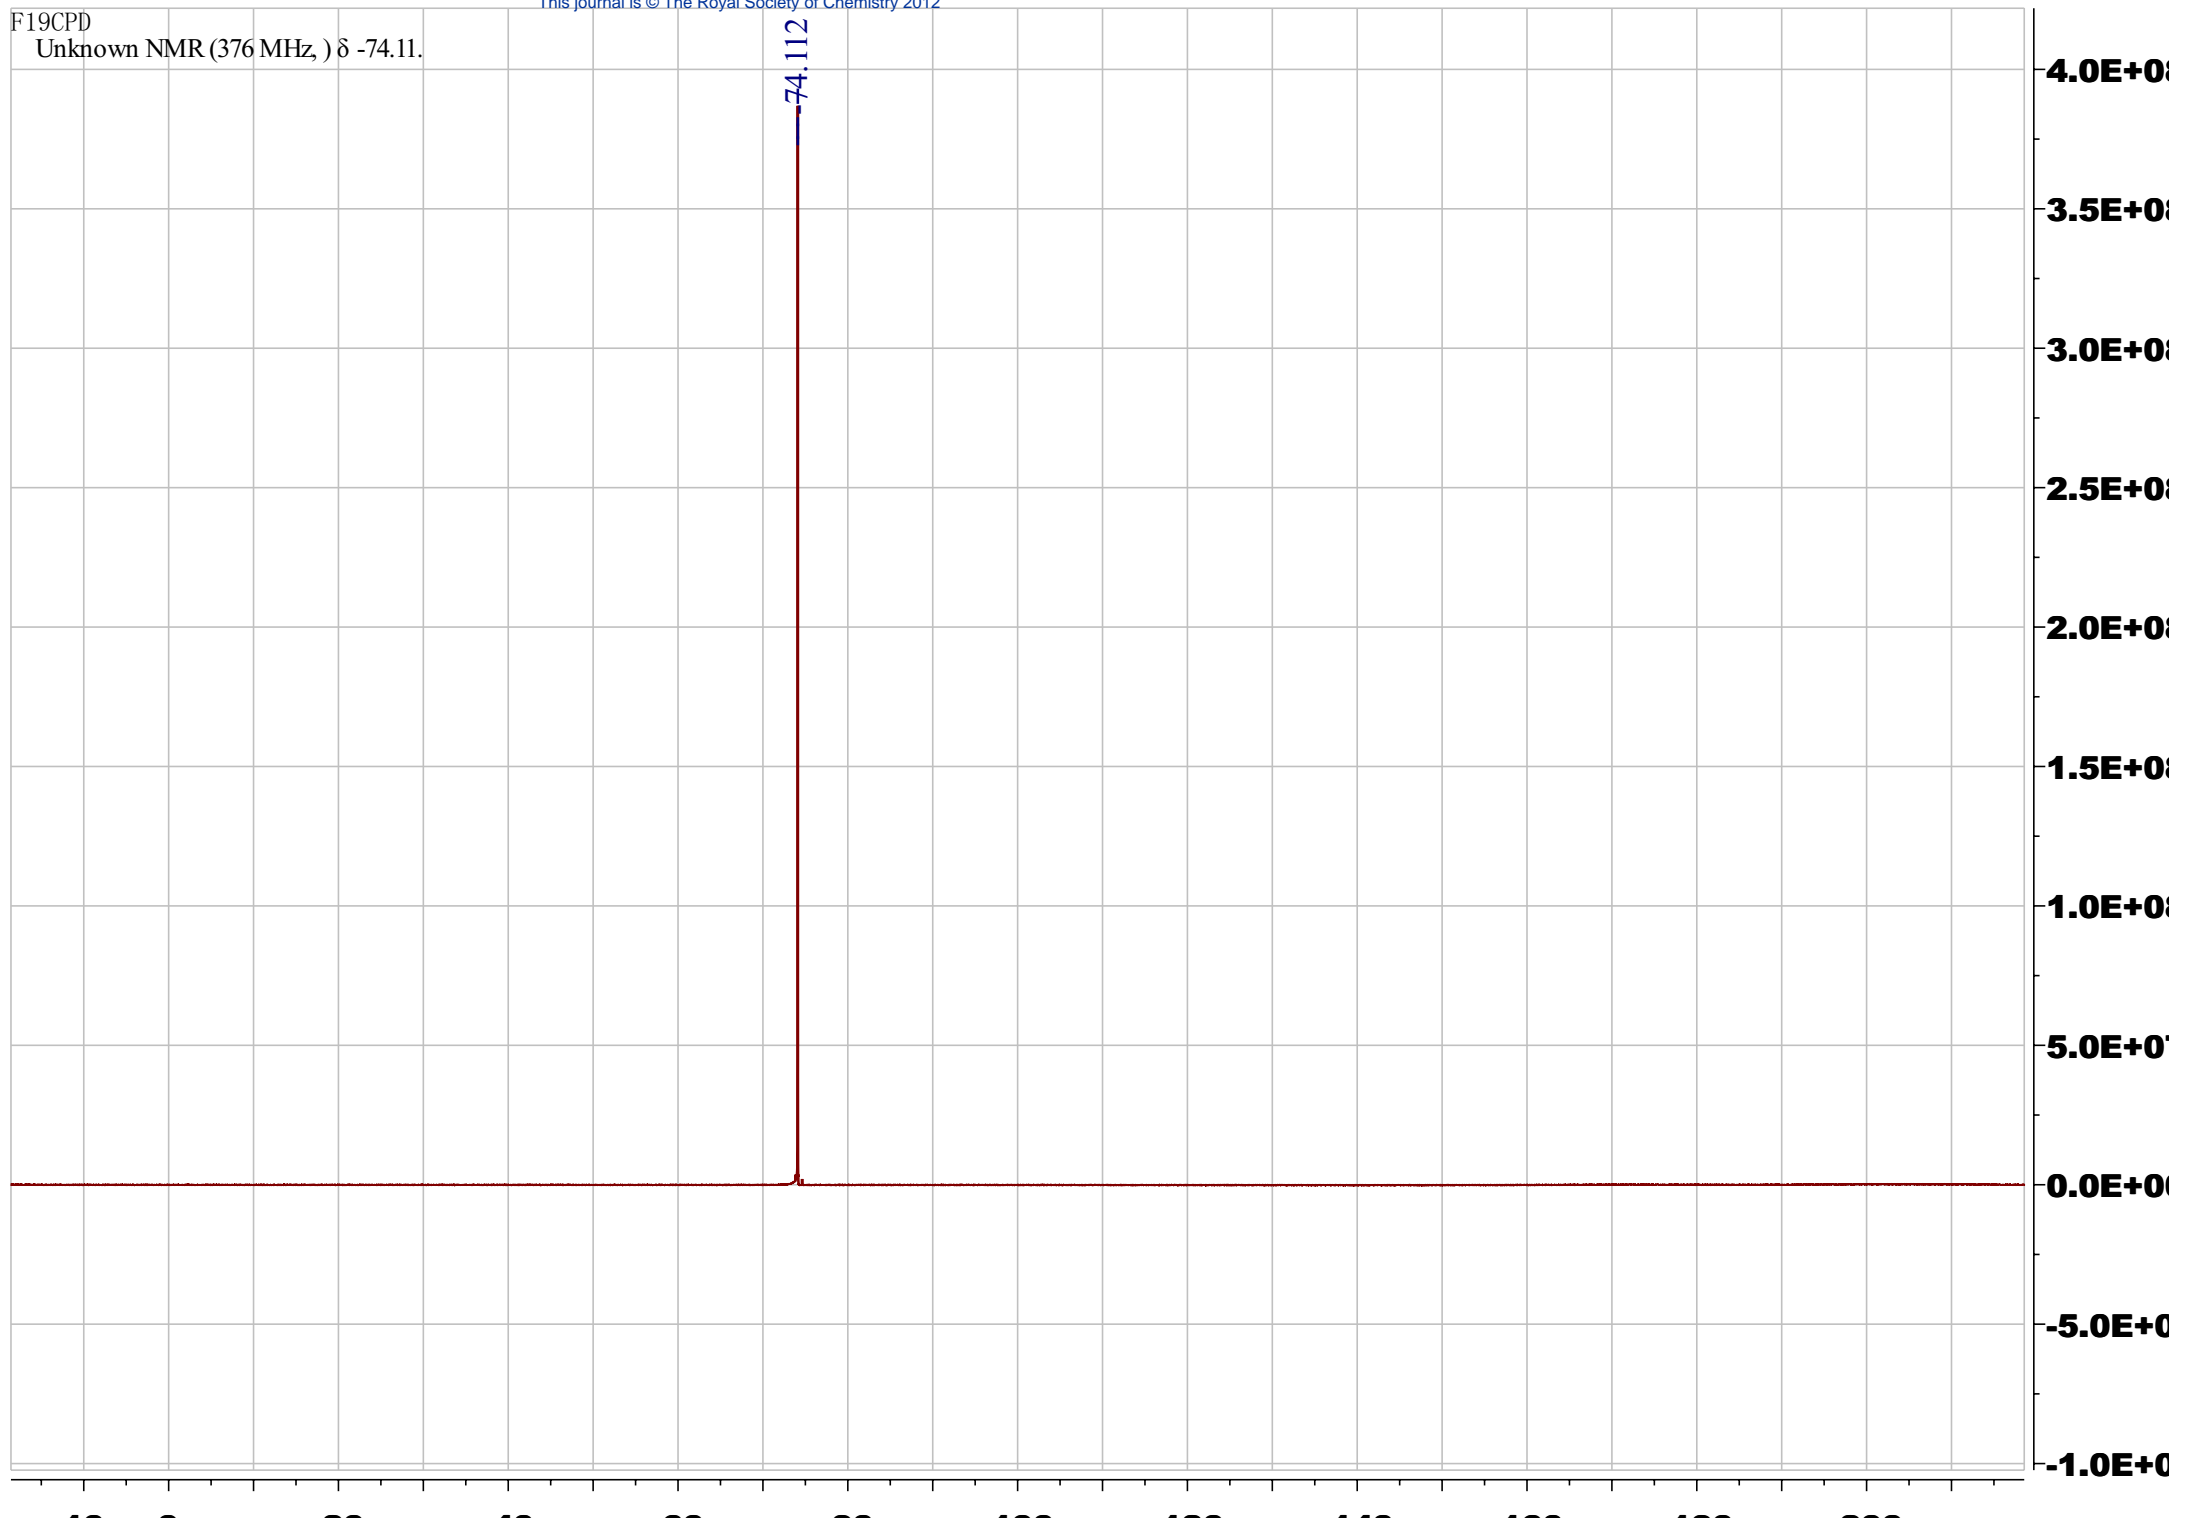

C13CPD

Unknown NMR (101 MHz, )  $\delta$  167.27, 134.22, 134.12, 133.50, 129.76, 129.67, 129.51, 129.36, 128.97, 127.19, 126.27, 42.55.

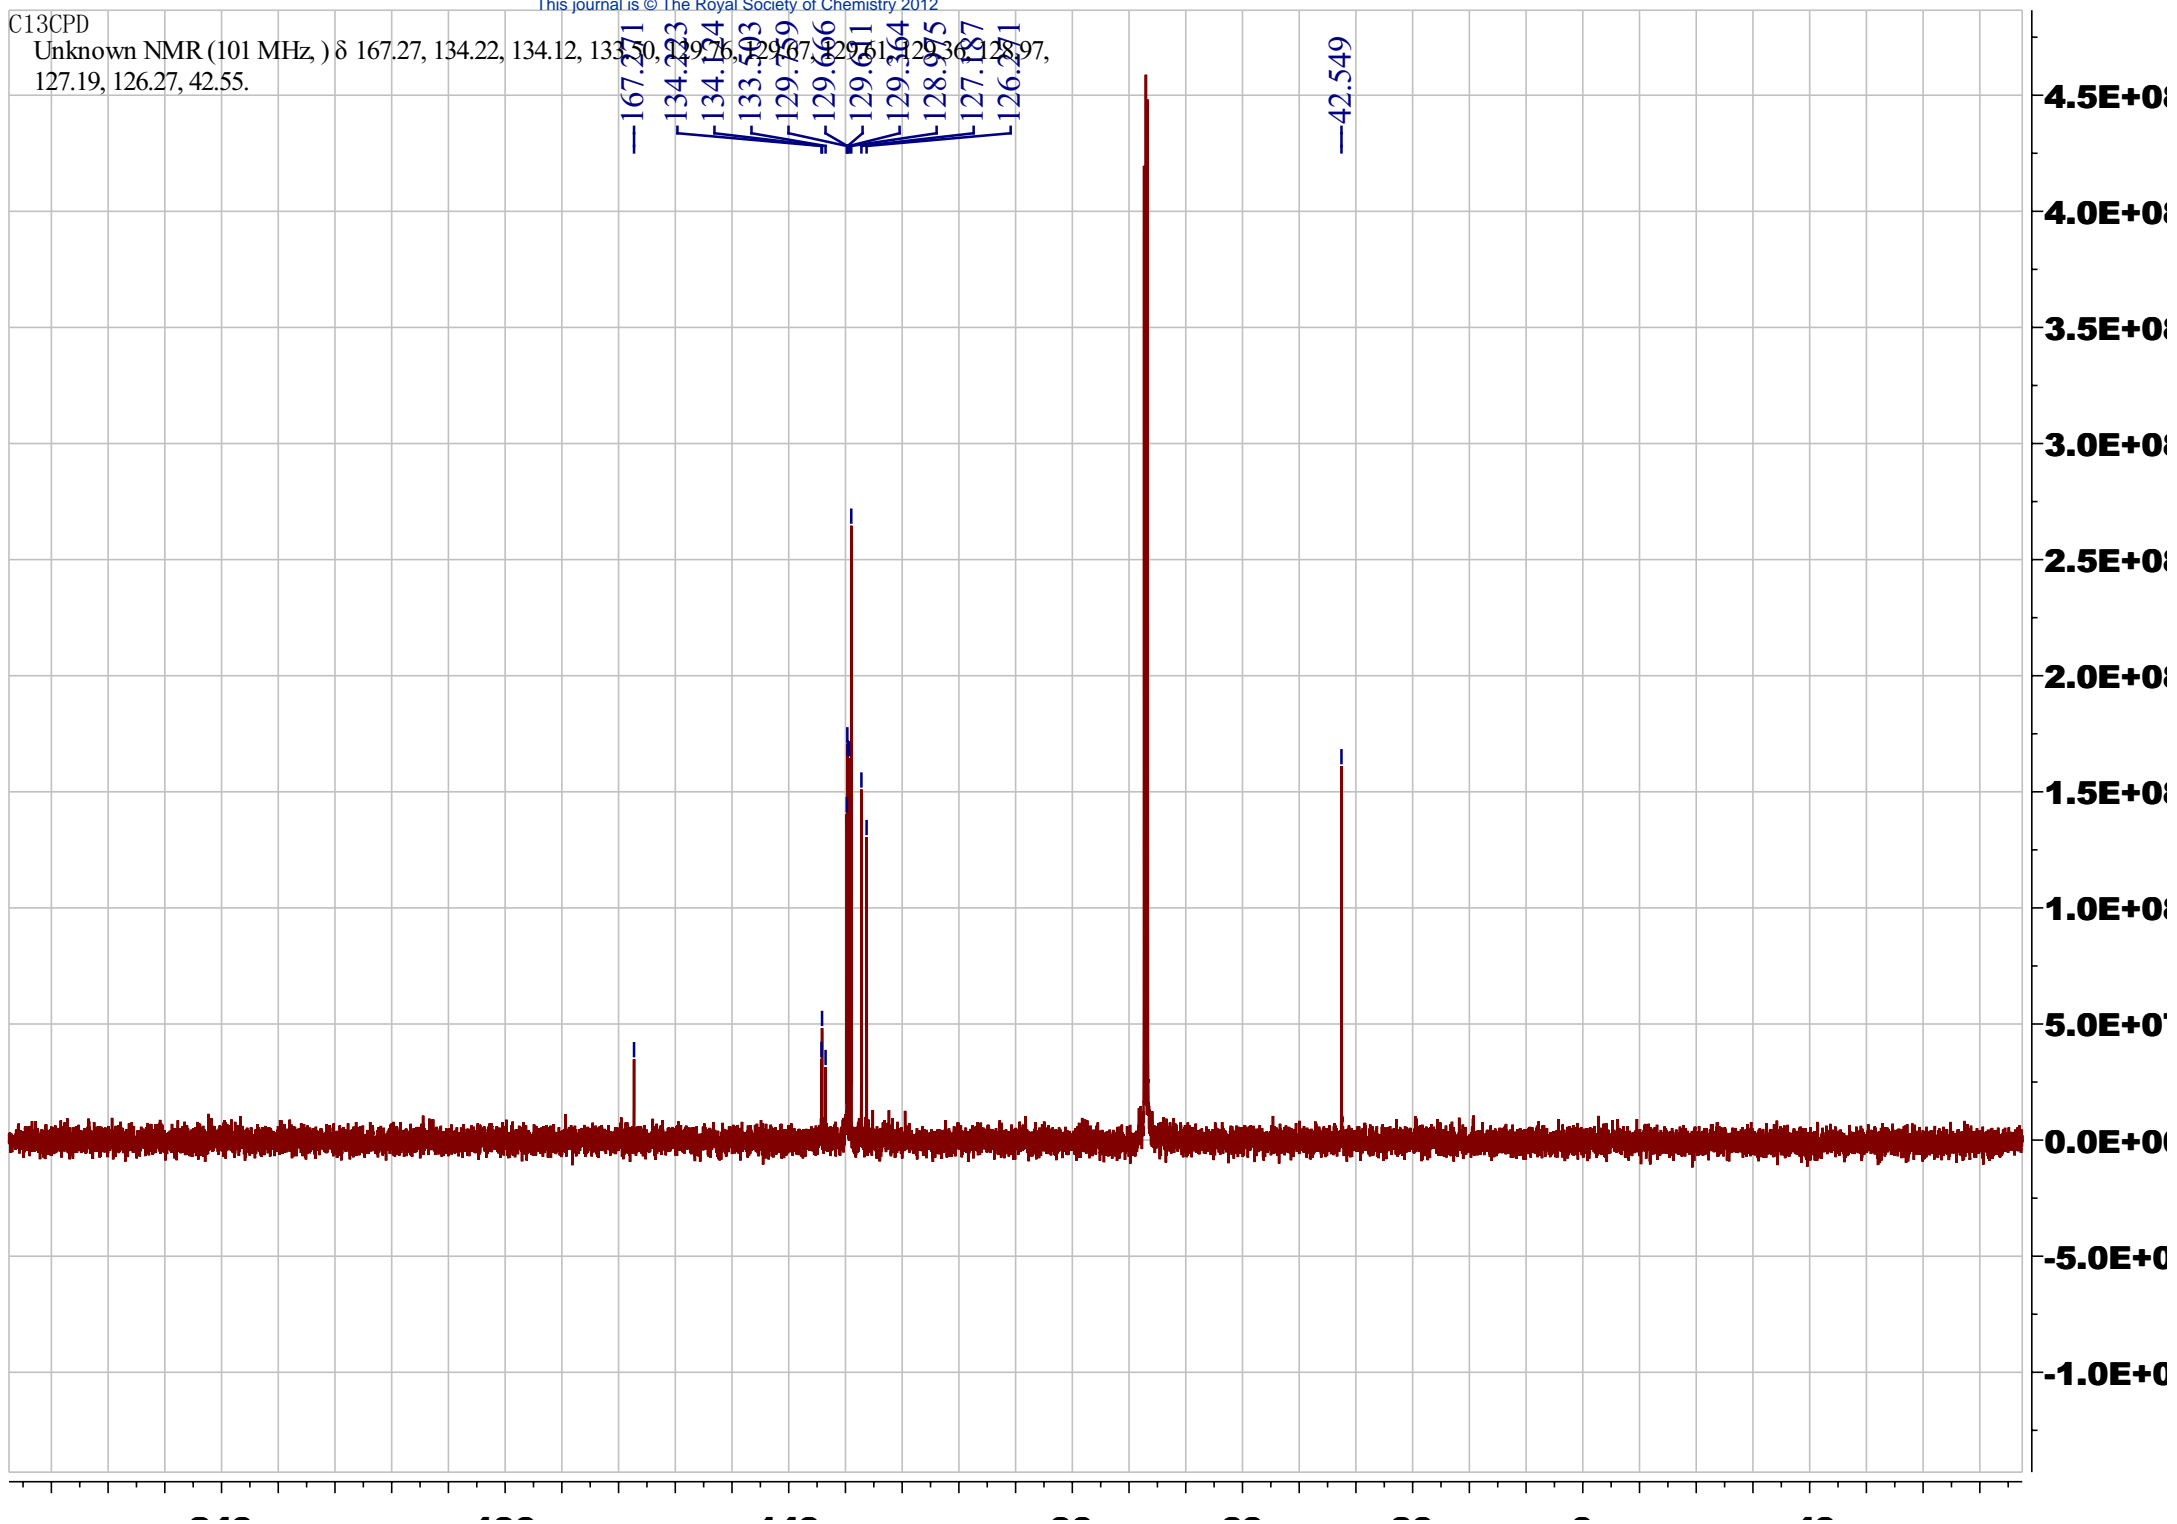

328.0953

|               |               |             |           |                 |                      |                        |                       |
|---------------|---------------|-------------|-----------|-----------------|----------------------|------------------------|-----------------------|
| Sample Name   | lc/ms         | Position    | Vial 5    | Instrument Name | Agilent_G6520_QTOF_L | User Name              | Agilent FSE           |
| Inj Vol       | 1             | InjPosition |           | SampleType      | Sample               | IRM Calibration Status | Some Ions Missed      |
| Data Filename | CC-6-3.d (6e) | ACQ Method  | chen-ms.m | Comment         |                      | Acquired Time          | 4/19/2012 11:35:34 AM |

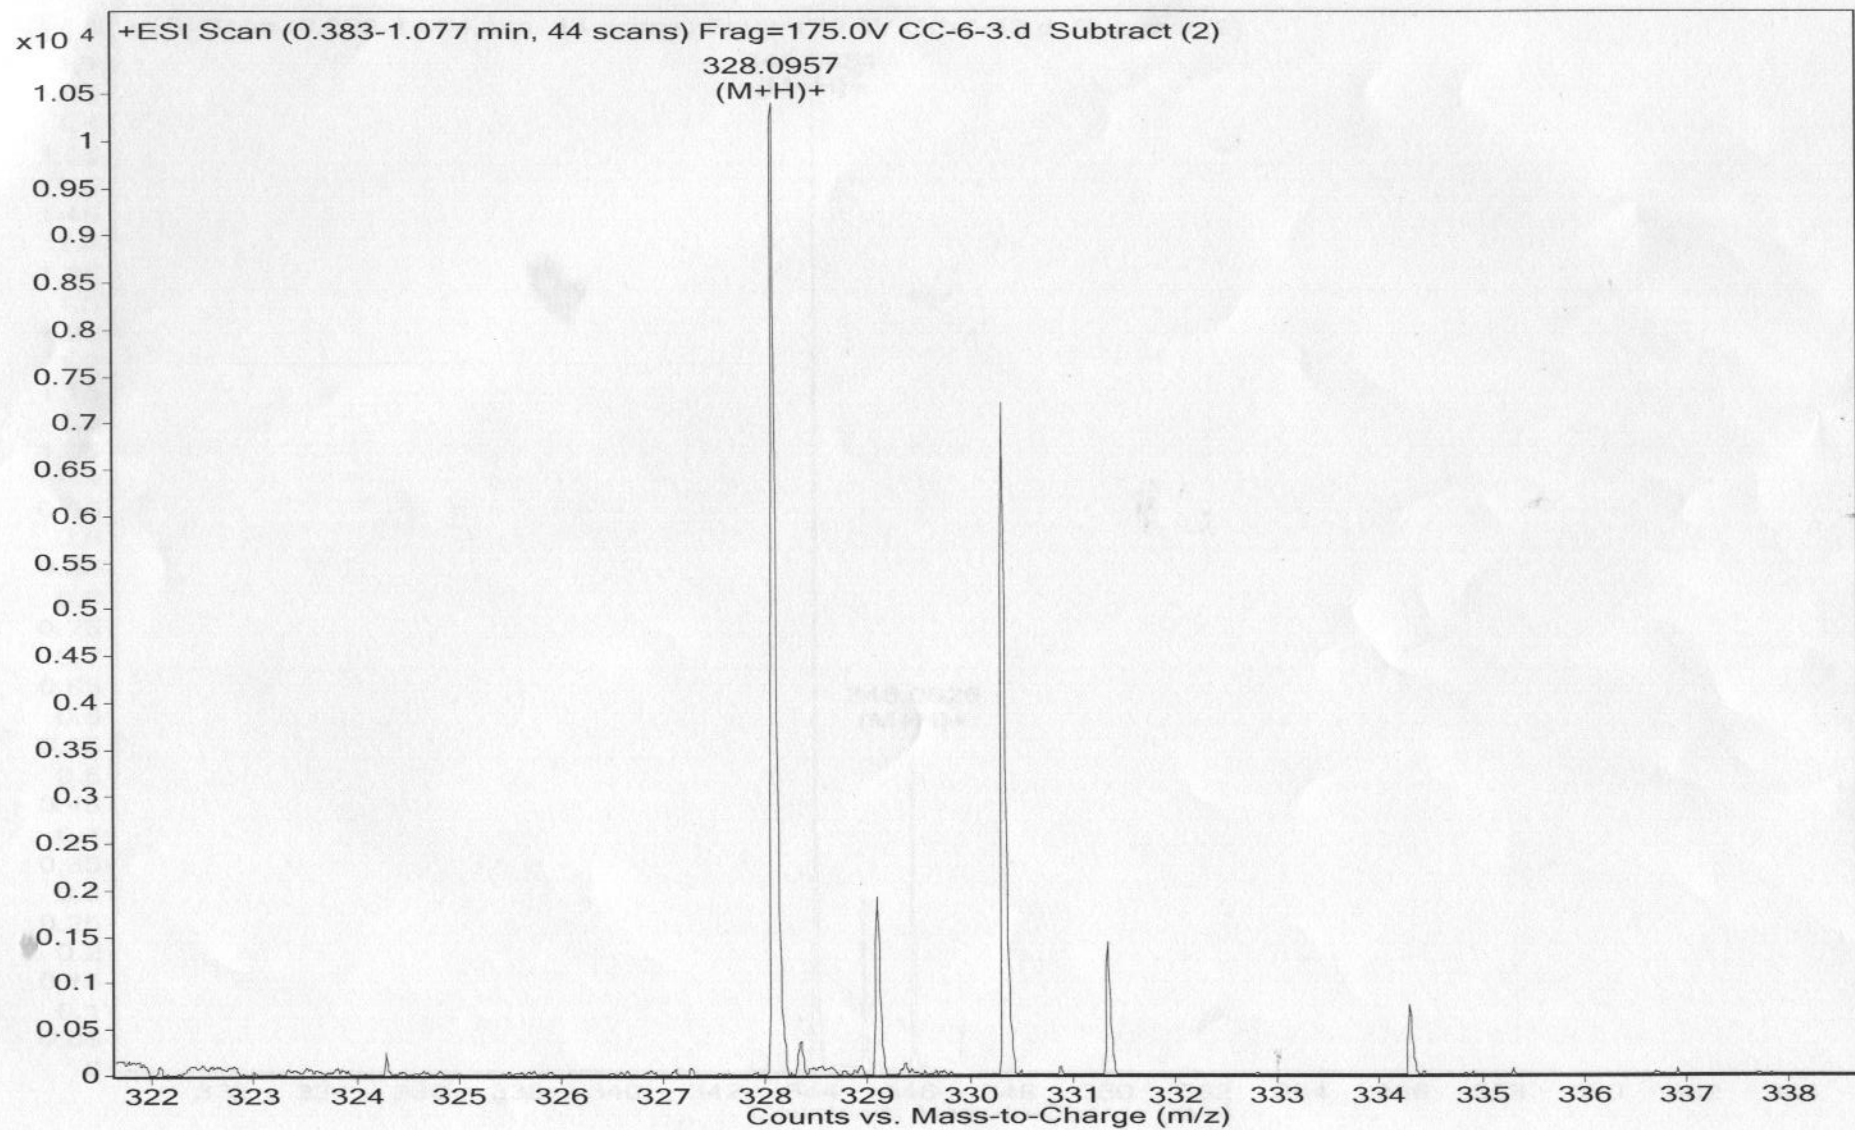

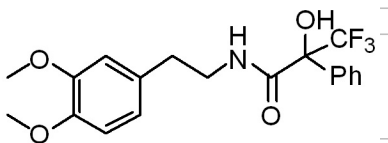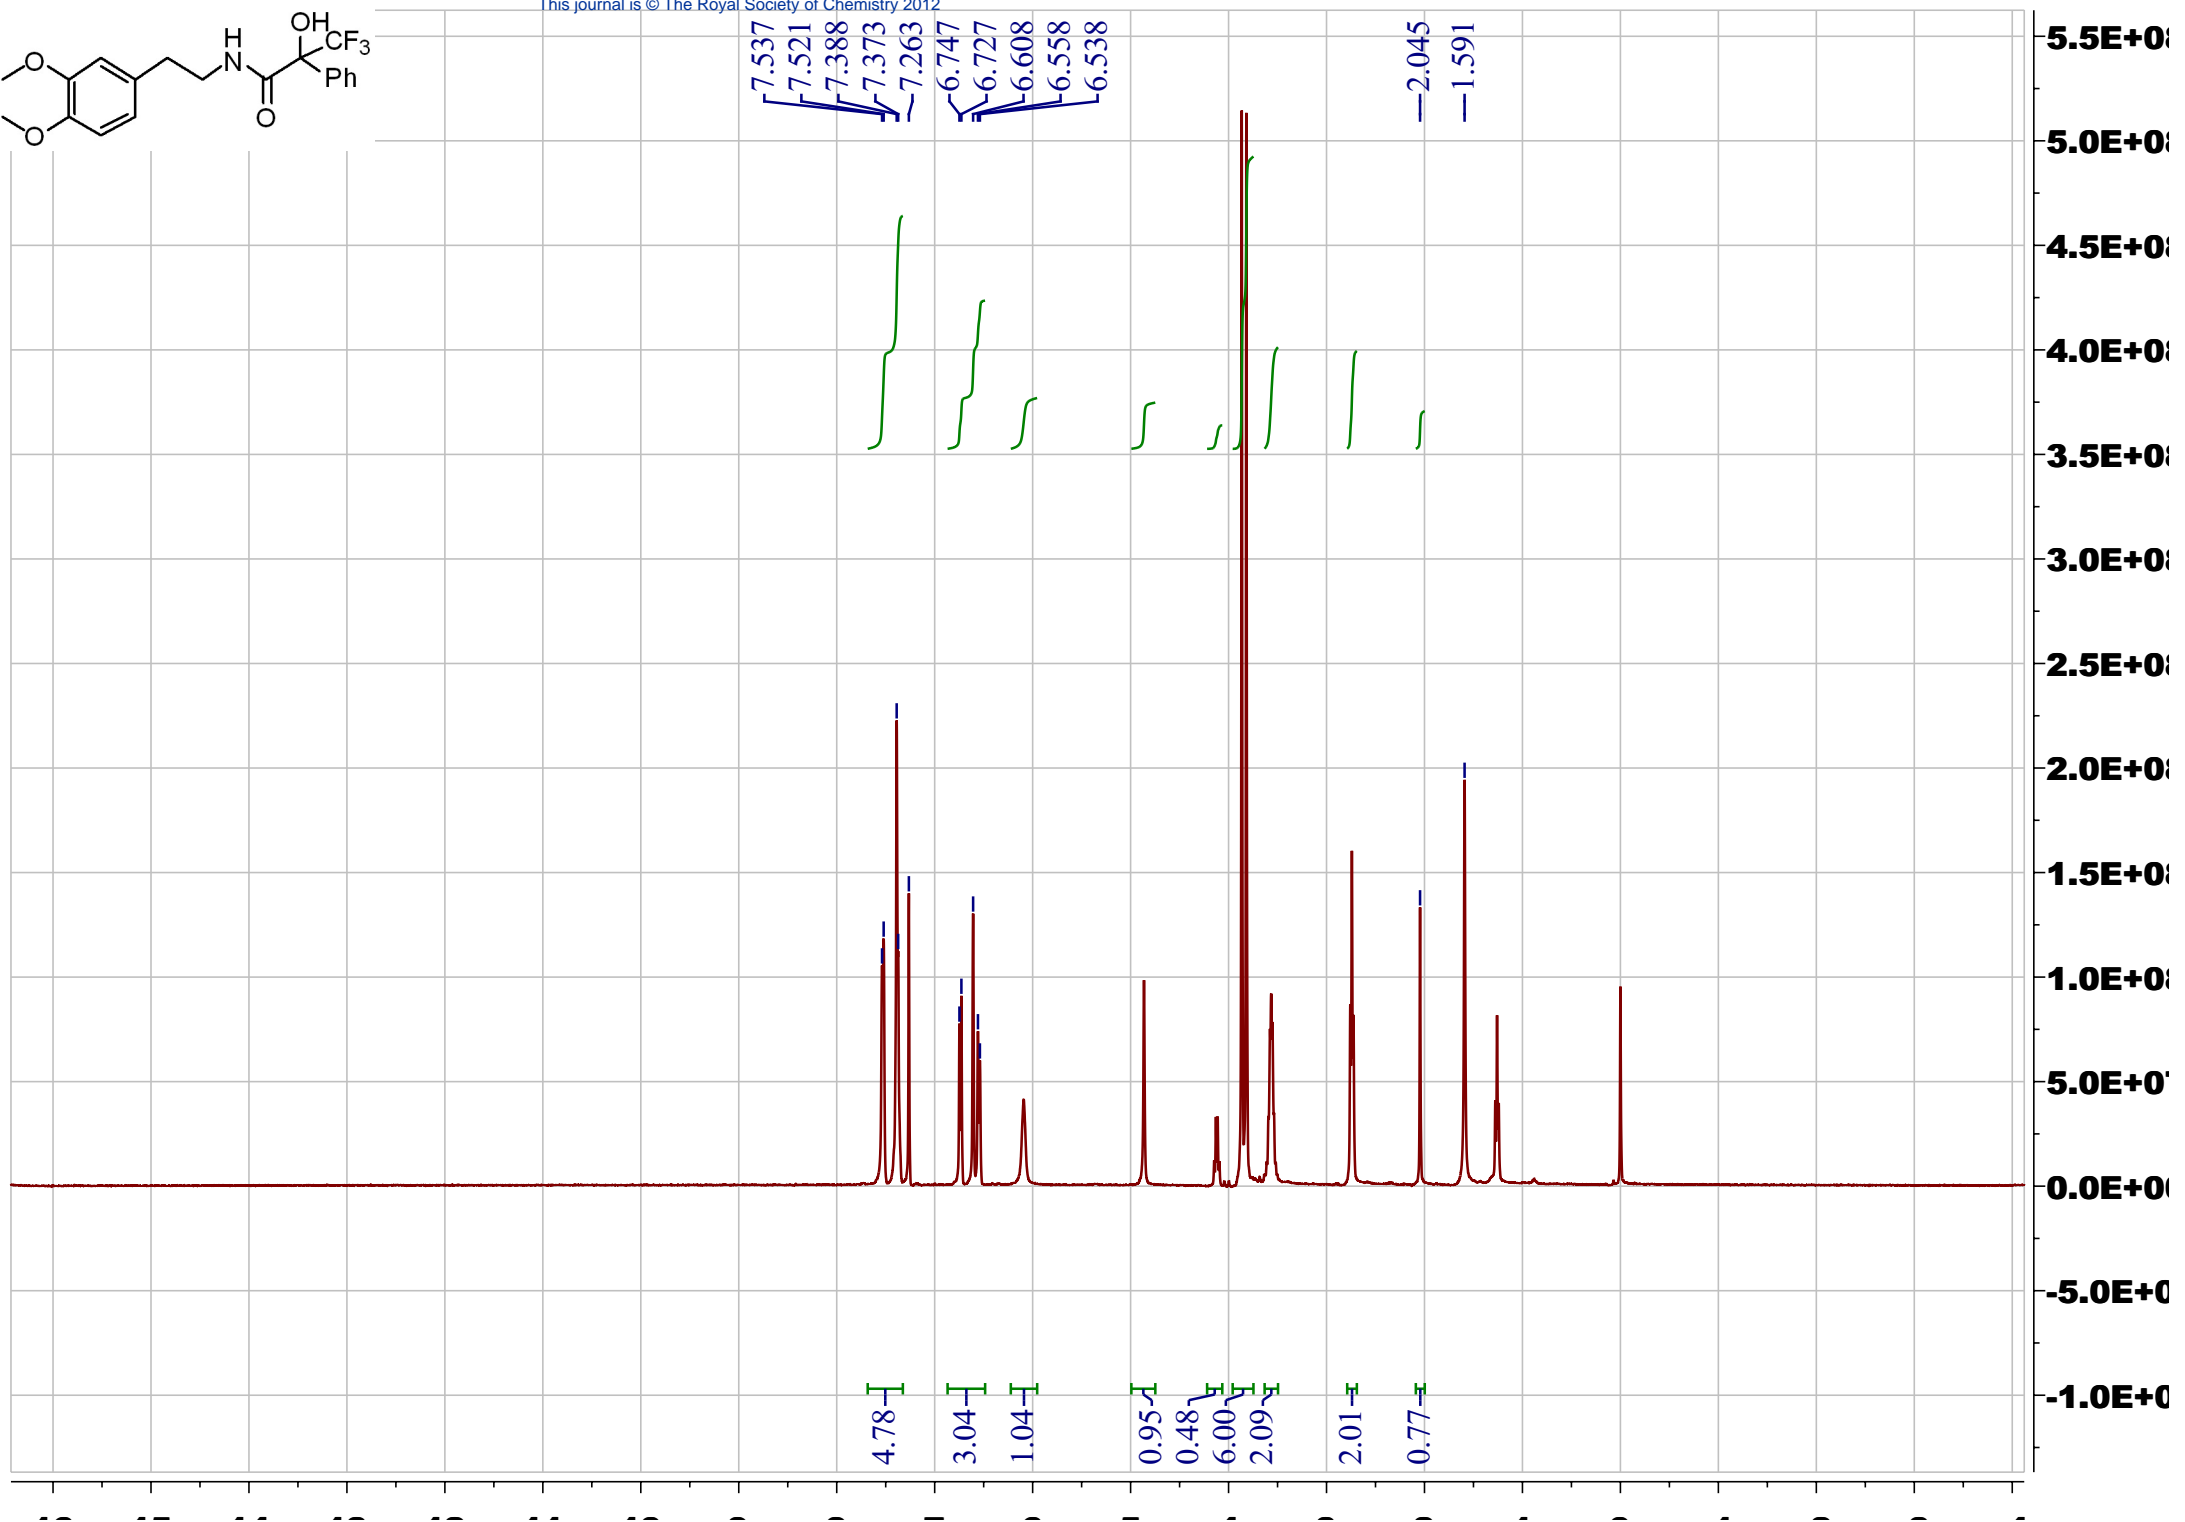

F19CPD  
Unknown NMR (376 MHz, )  $\delta$  -74.11.

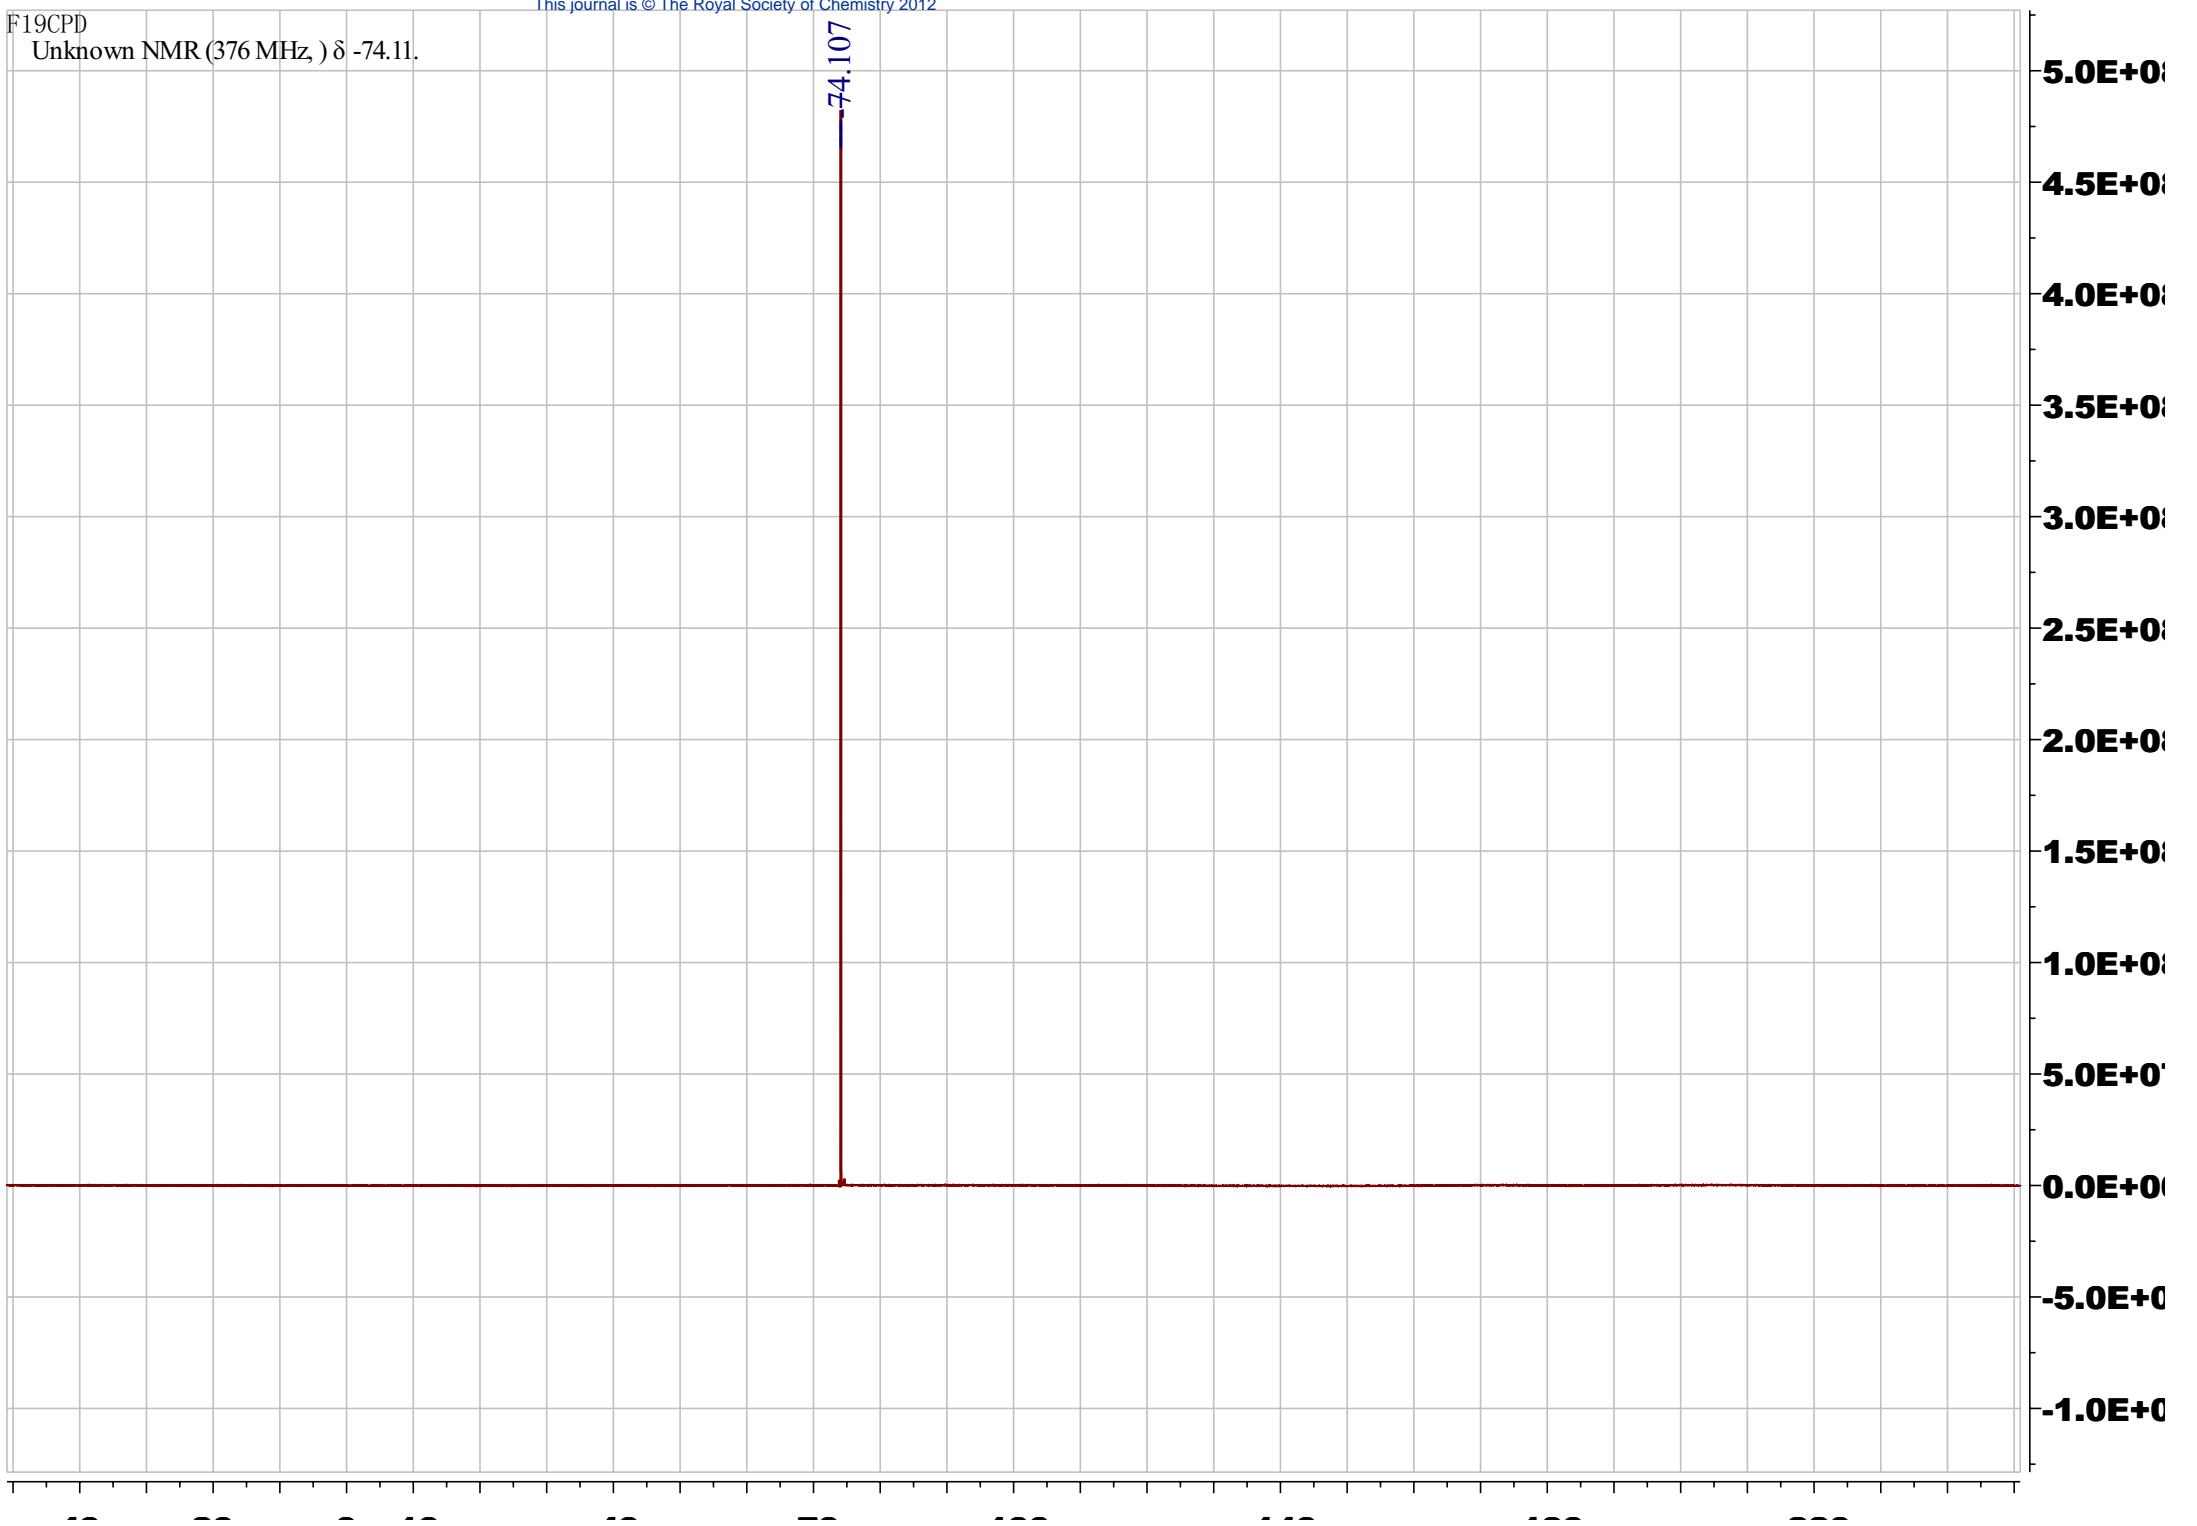

C13CPD

Unknown NMR (101 MHz, )  $\delta$  167.12, 149.10, 147.84, 134.58, 130.99, 129.99, 128.85, 126.26, 120.62, 111.76, 111.405, 55.92, 55.78, 41.71, 34.73.

167.125  
149.099  
147.836  
134.580  
130.991  
129.988  
128.854  
126.206  
120.620  
111.769  
111.405

55.918  
55.777  
41.708  
34.731

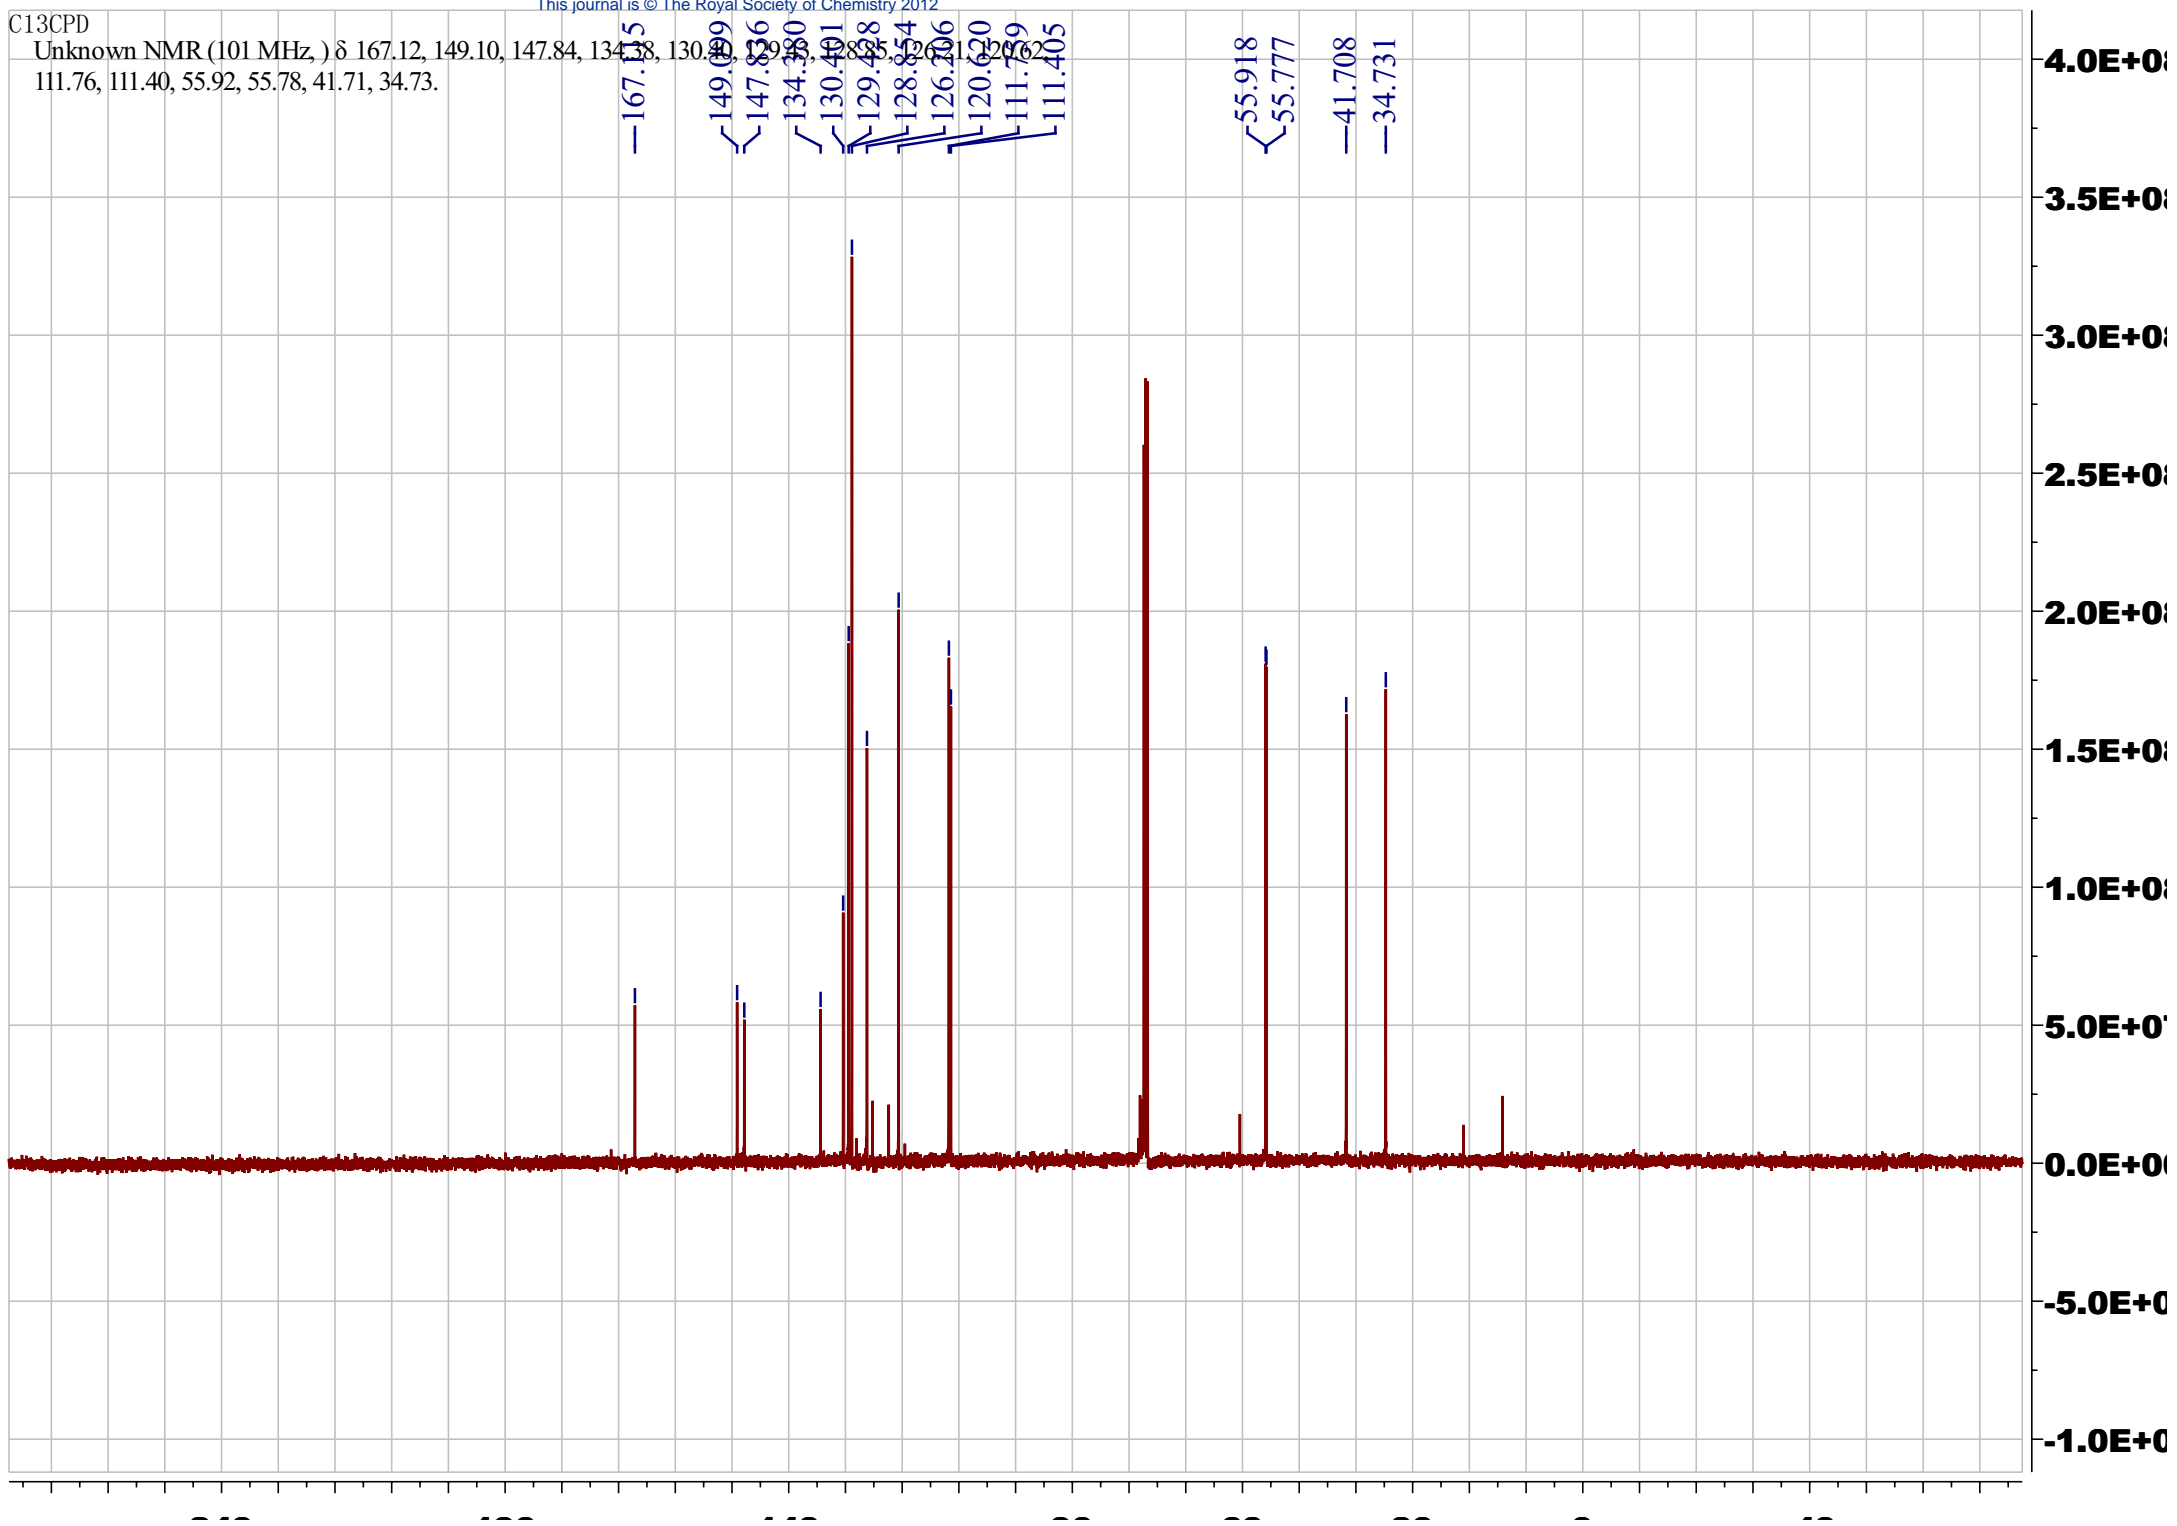

344.0660

|               |                |             |           |                 |                      |                        |                       |
|---------------|----------------|-------------|-----------|-----------------|----------------------|------------------------|-----------------------|
| Sample Name   | lc/ms          | Position    | Vial 6    | Instrument Name | Agilent_G6520_QTOF_L | User Name              | Agilent FSE           |
| Inj Vol       | 1              | InjPosition |           | SampleType      | Sample               | IRM Calibration Status | Some Ions Missed      |
| Data Filename | CC-5-43.d (6f) | ACQ Method  | chen-ms.m | Comment         |                      | Acquired Time          | 4/19/2012 11:41:54 AM |

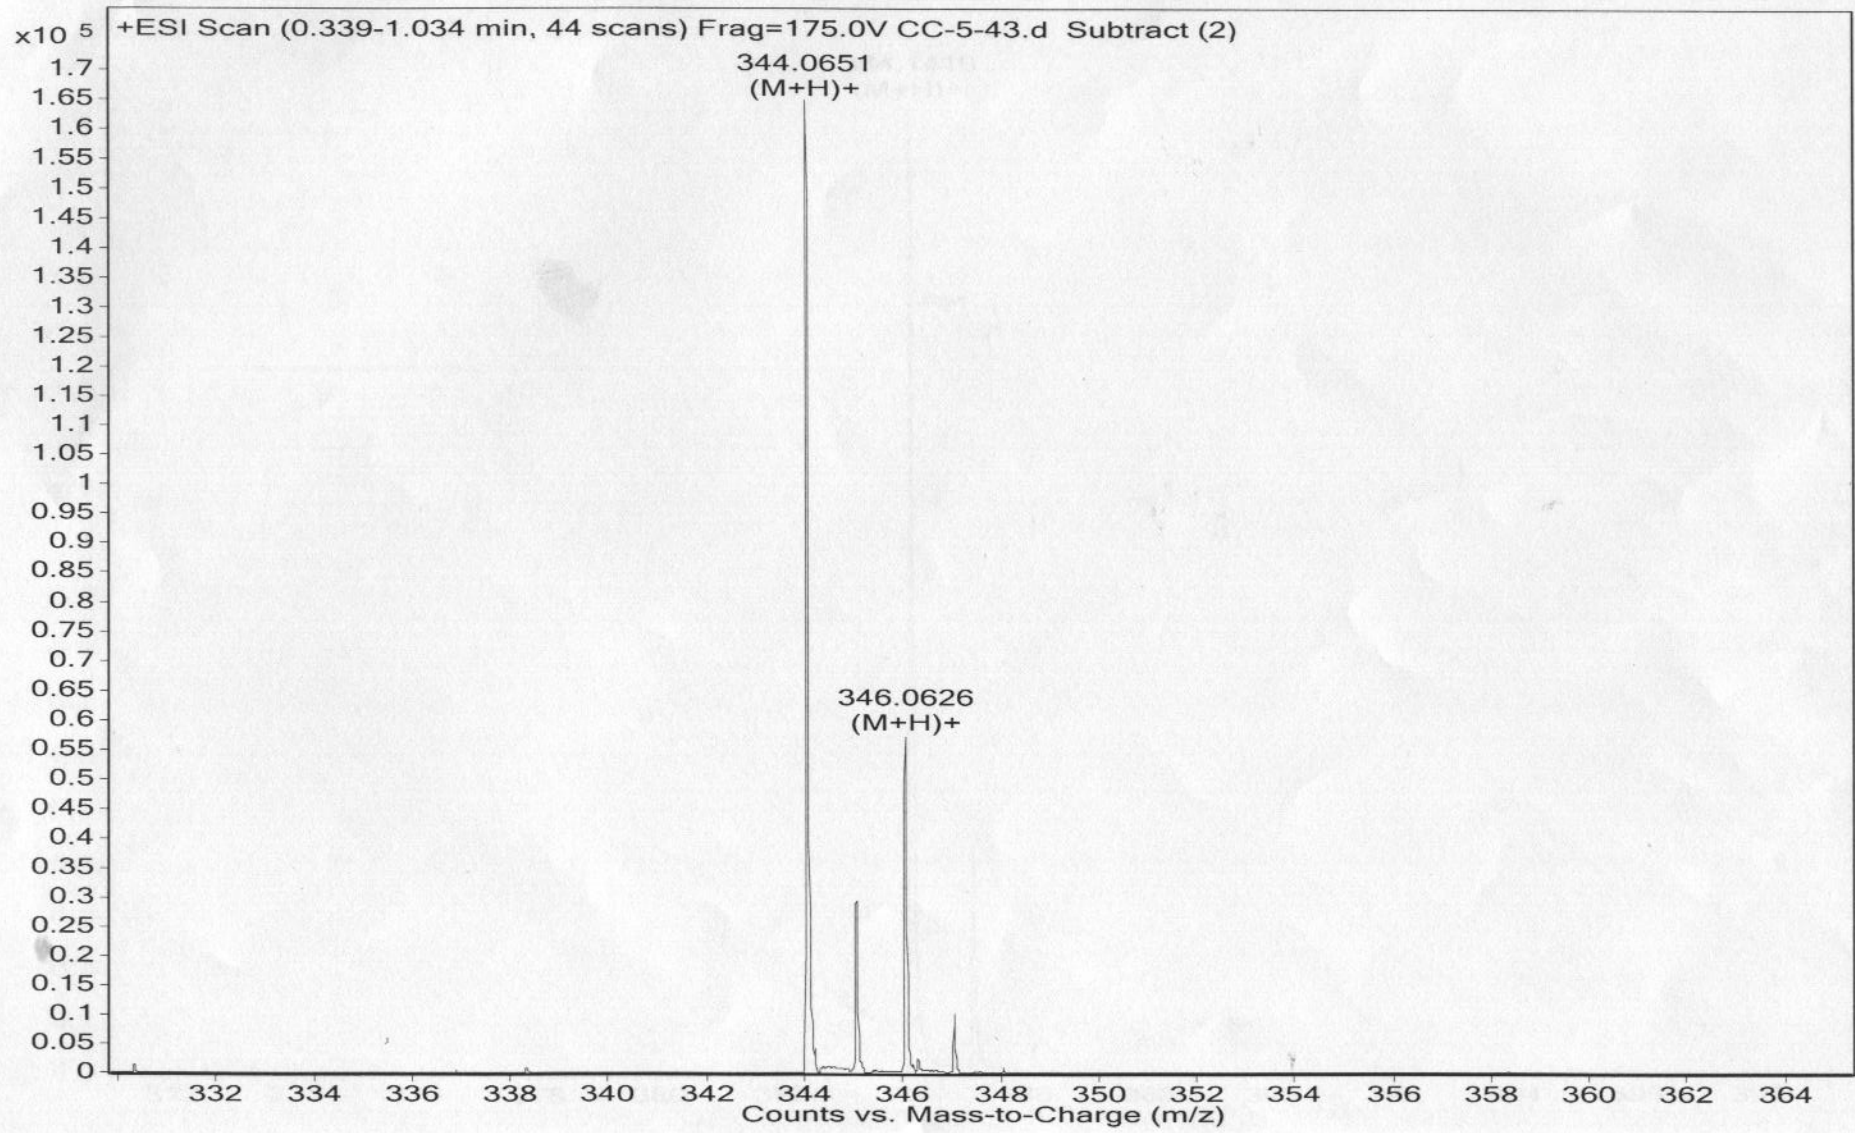

cc-5-4  
PROTON

7.64  
7.63  
7.42  
7.42  
7.41  
7.26  
7.13  
7.11  
7.04  
7.02

4.89  
4.88  
4.52  
4.51  
4.48  
4.47  
4.44  
4.42  
4.40  
4.39

2.33

<sup>1</sup>H NMR (400 MHz, CDCl<sub>3</sub>) δ 7.63 (d, *J* = 4.5 Hz, 2H), 7.49 – 7.37 (m, 3H), 7.12 (d, *J* = 7.9 Hz, 2H), 7.03 (d, *J* = 8.0 Hz, 2H), 6.37 (s, 1H), 4.88 (d, *J* = 7.2 Hz, 1H), 4.45 (ddd, *J* = 34.1, 14.8, 5.6 Hz, 2H), 2.33 (s, 3H).

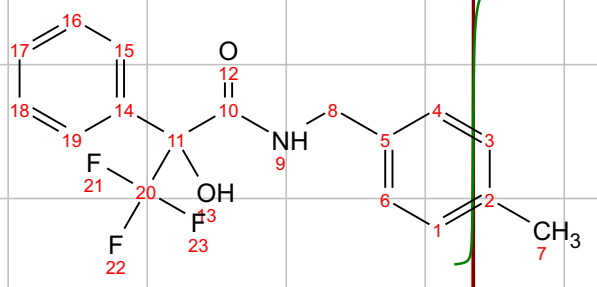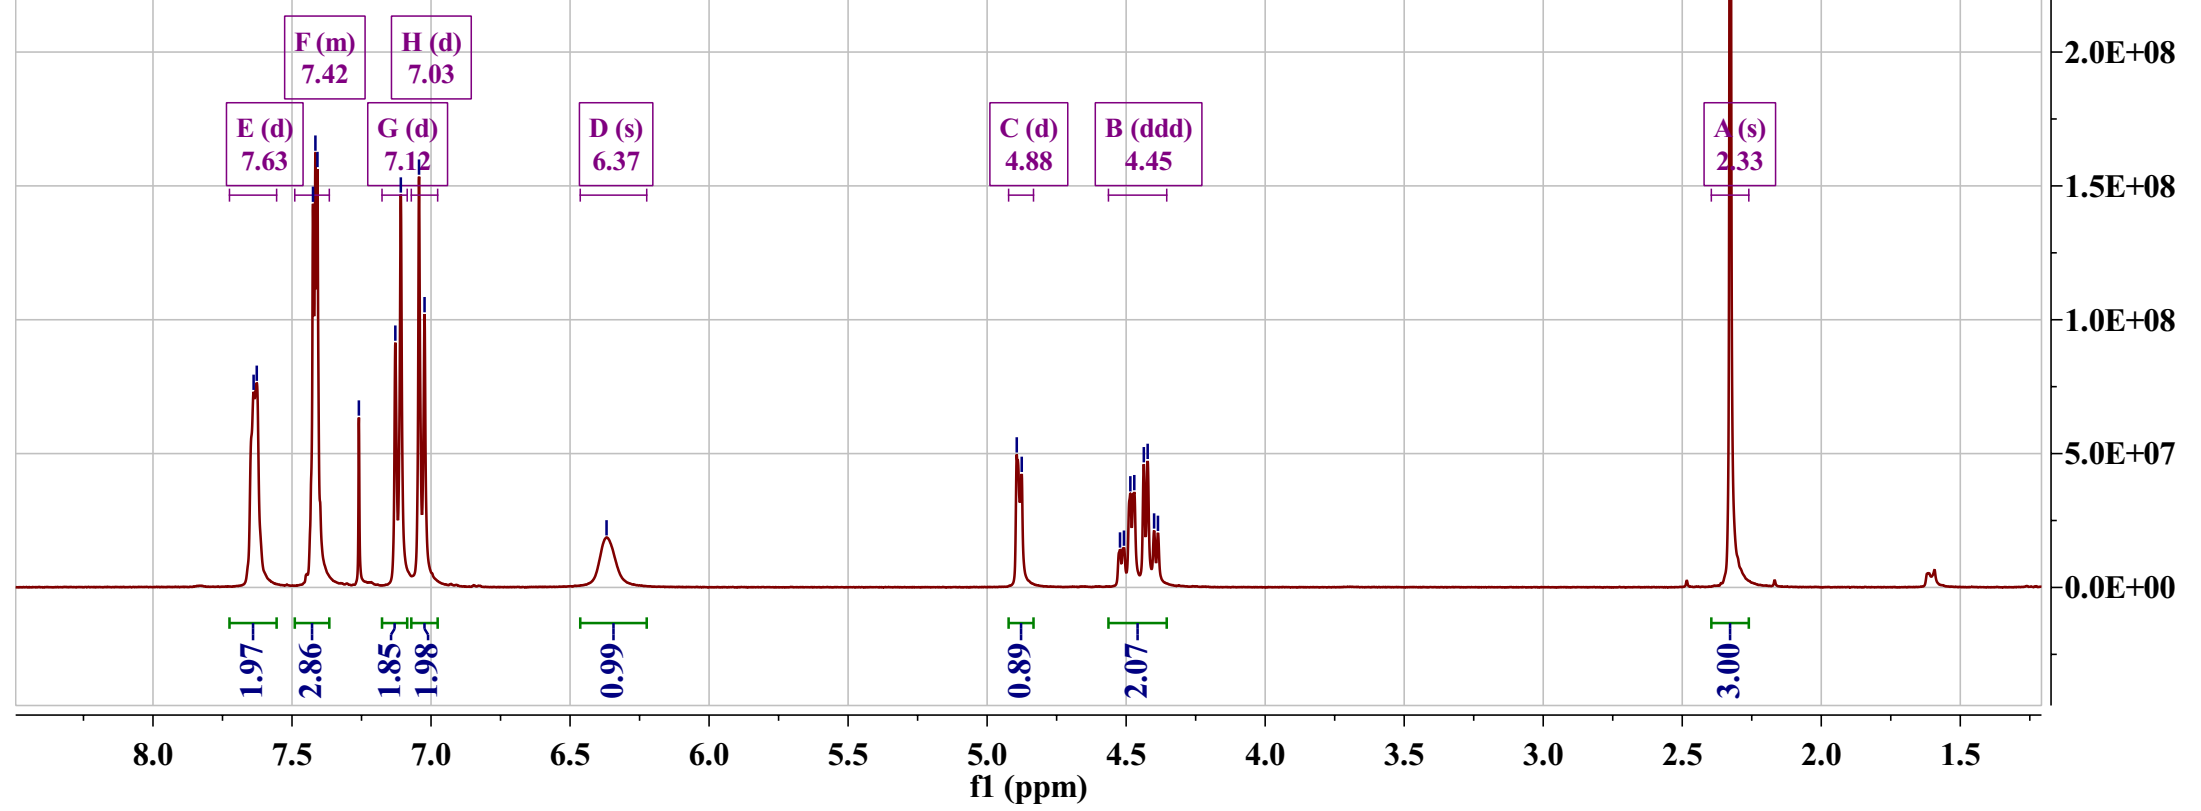



cc-5-4  
F19CPD

Electronic Supplementary Material (ESI) for Green Chemistry  
This journal is © The Royal Society of Chemistry 2012

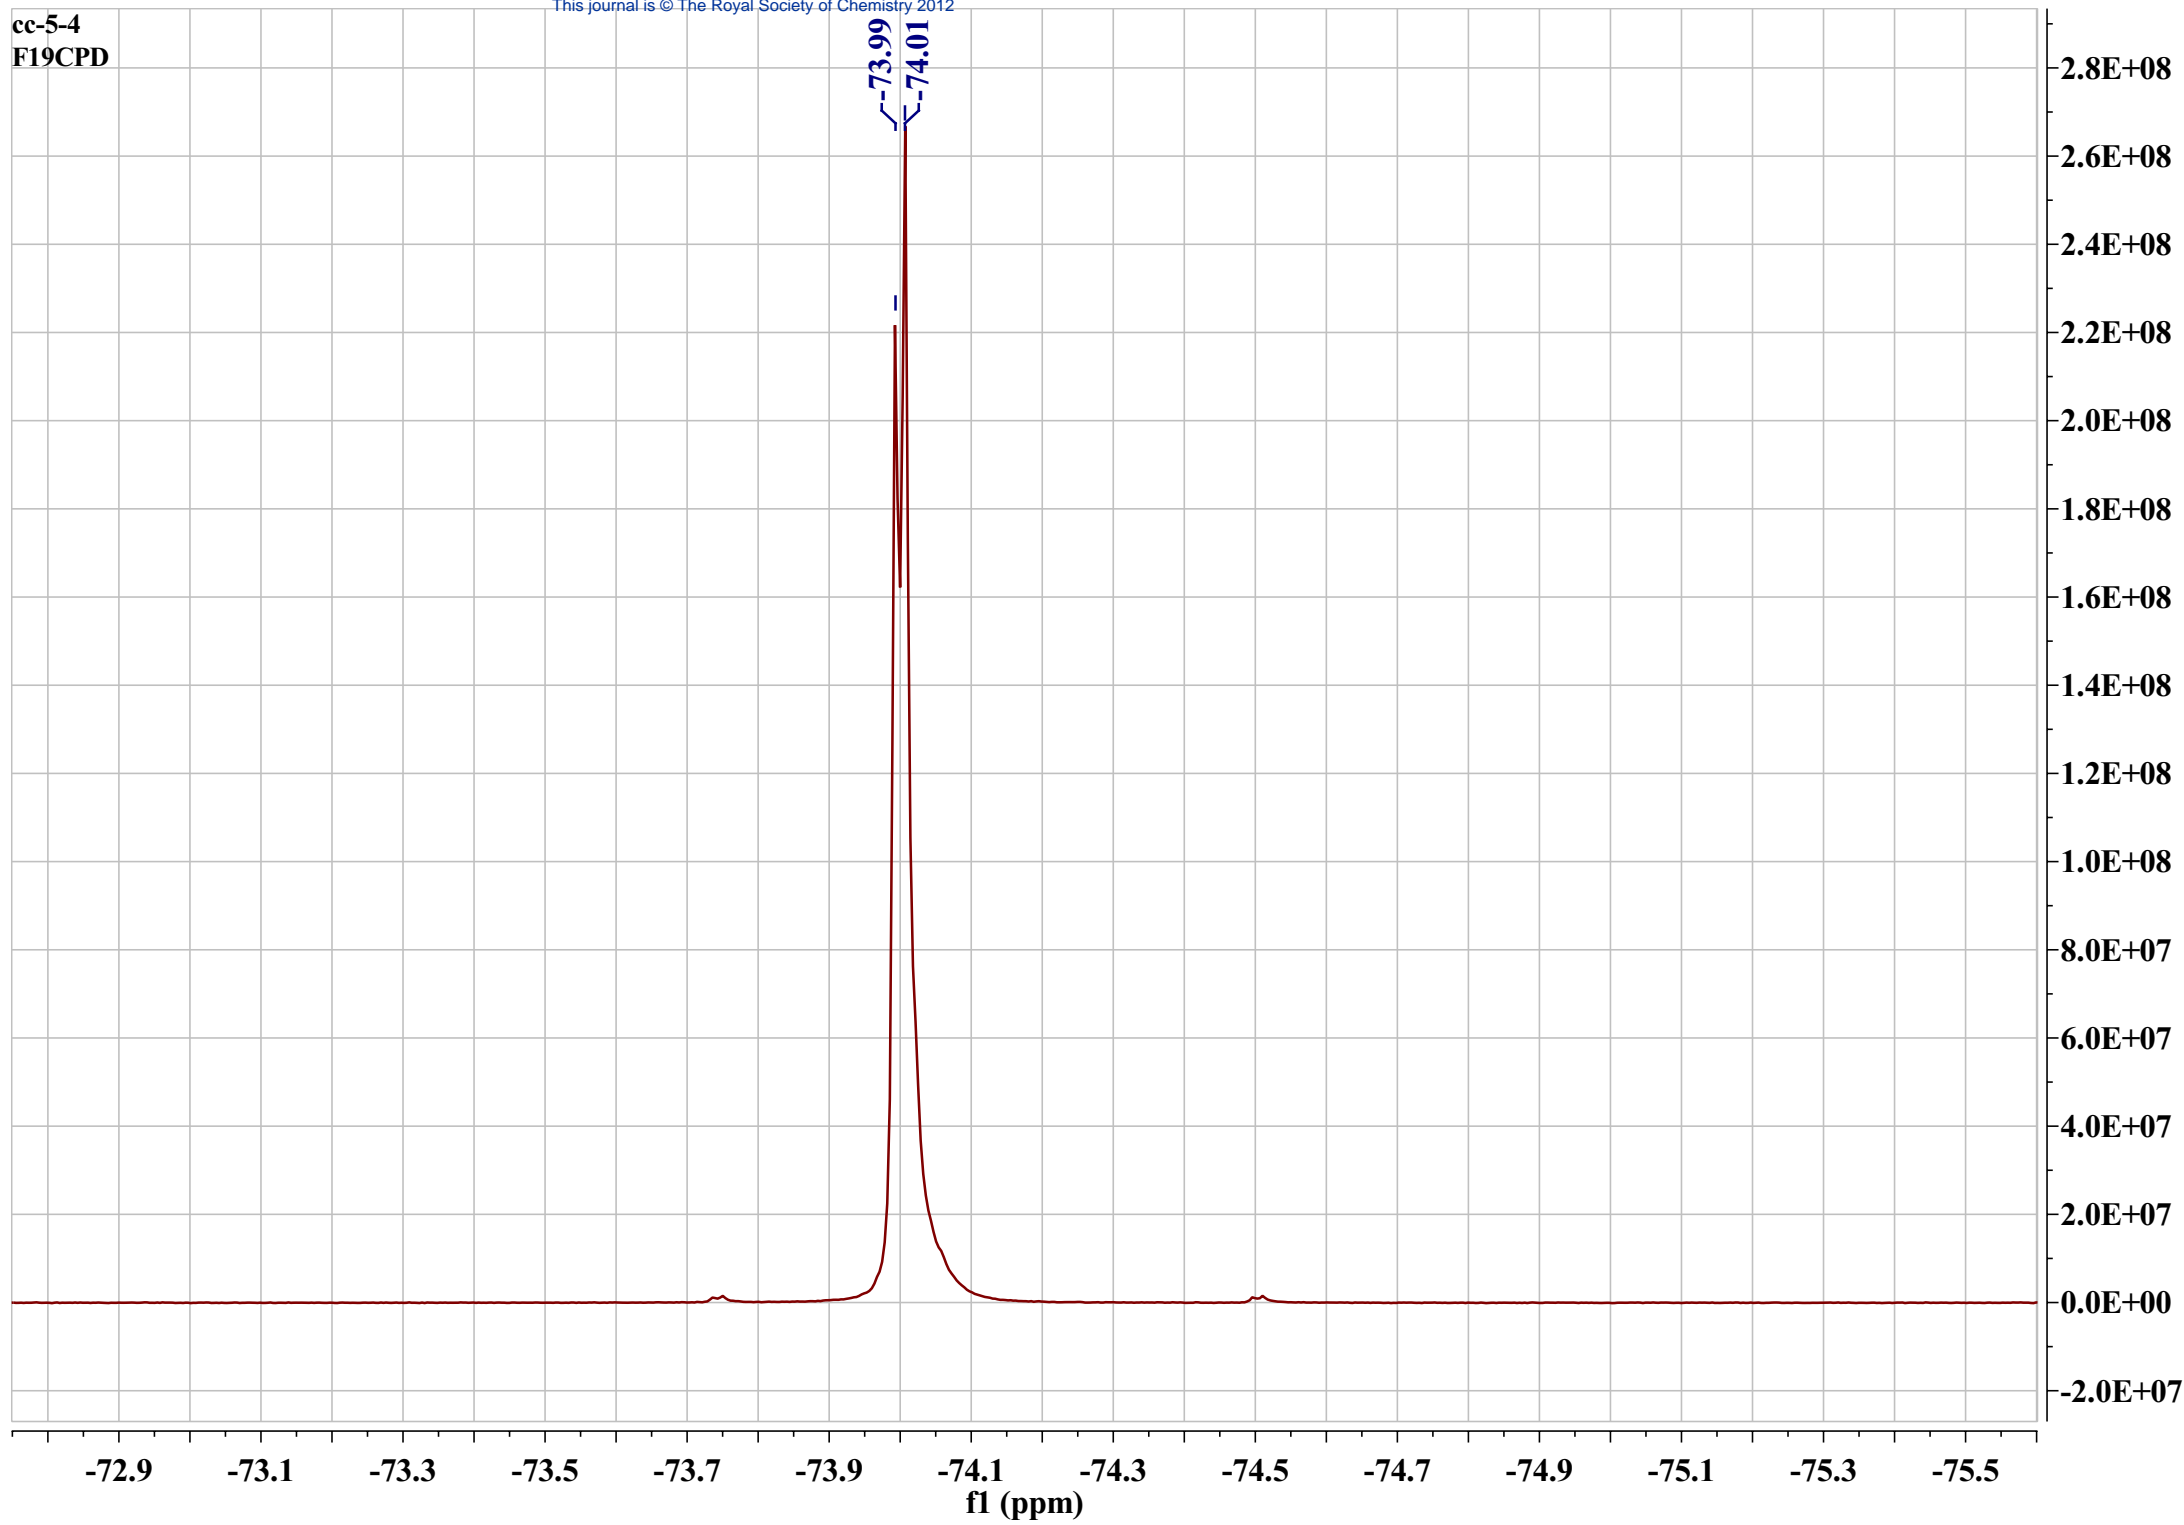

cc-5-4  
<sup>13</sup>C NMR (101 MHz, CDCl<sub>3</sub>) δ 167.16, 137.69, 134.38, 133.62, 129.59, 129.33, 128.98, 127.39, 126.33, 122.40, 44.30, 21.11.

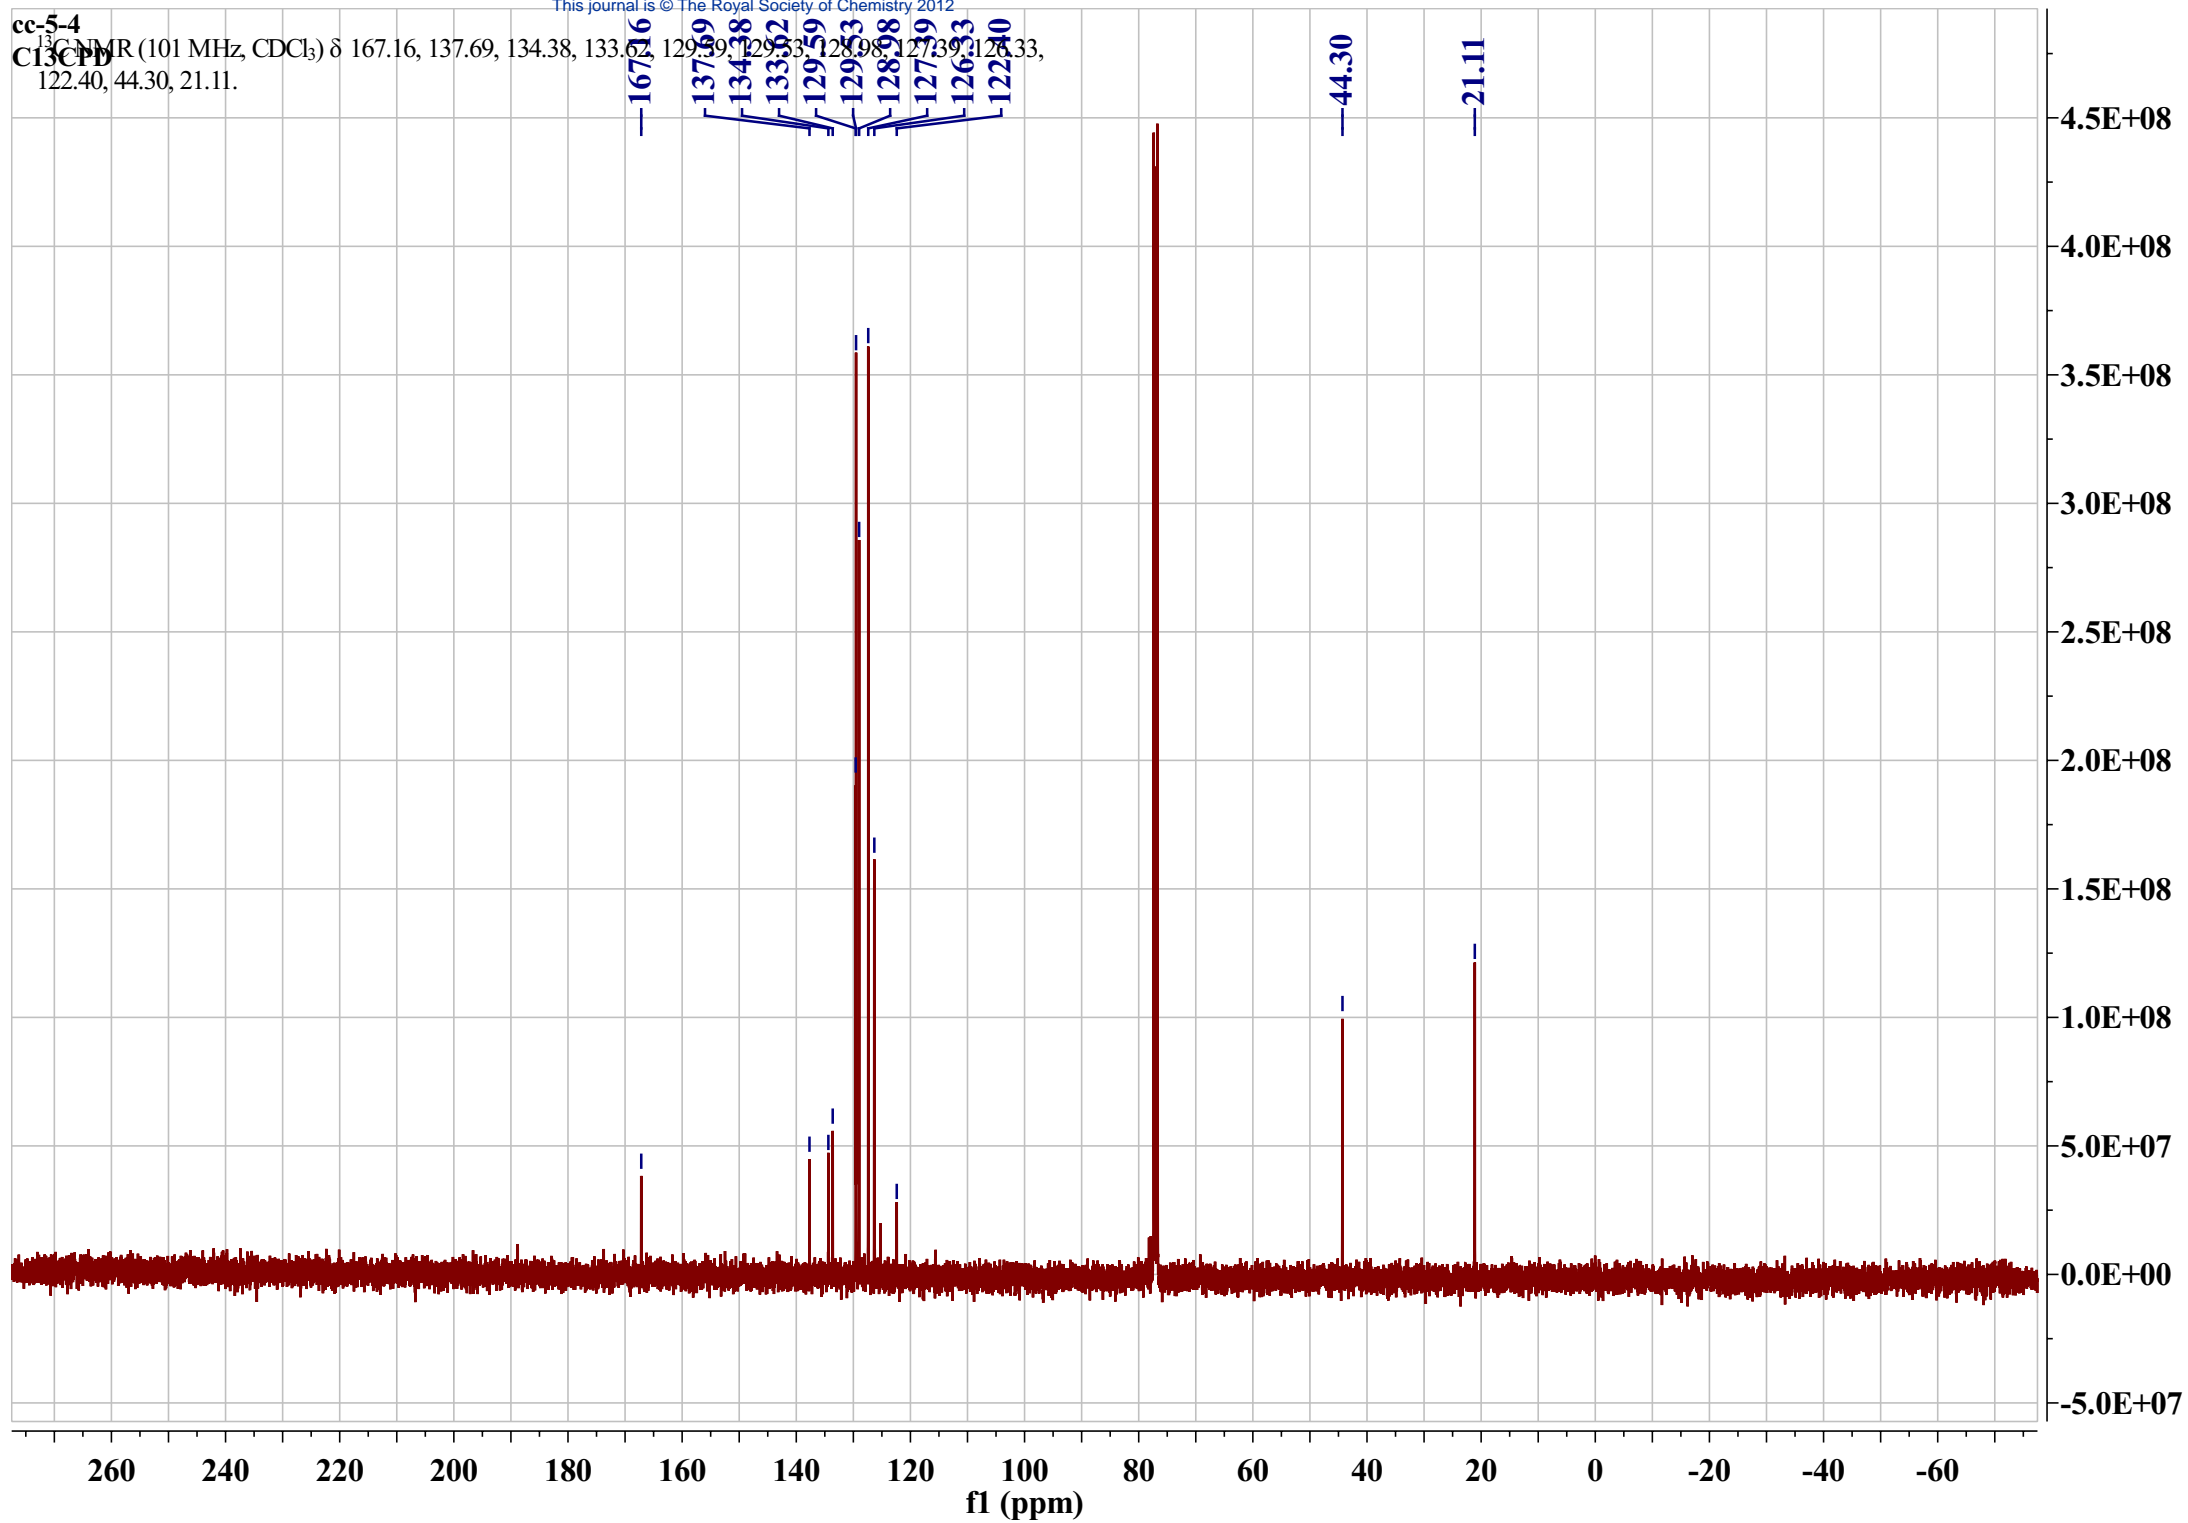

384.1417

|                      |                |                    |           |                        |                      |                               |                       |
|----------------------|----------------|--------------------|-----------|------------------------|----------------------|-------------------------------|-----------------------|
| <b>Sample Name</b>   | lc/ms          | <b>Position</b>    | Vial 1    | <b>Instrument Name</b> | Agilent_G6520_QTOF_L | <b>User Name</b>              | Agilent FSE           |
| <b>Inj Vol</b>       | 1              | <b>InjPosition</b> |           | <b>SampleType</b>      | Sample               | <b>IRM Calibration Status</b> | Some Ions Missed      |
| <b>Data Filename</b> | CC-5-36.d (69) | <b>ACQ Method</b>  | chen-ms.m | <b>Comment</b>         |                      | <b>Acquired Time</b>          | 4/19/2012 12:06:29 PM |

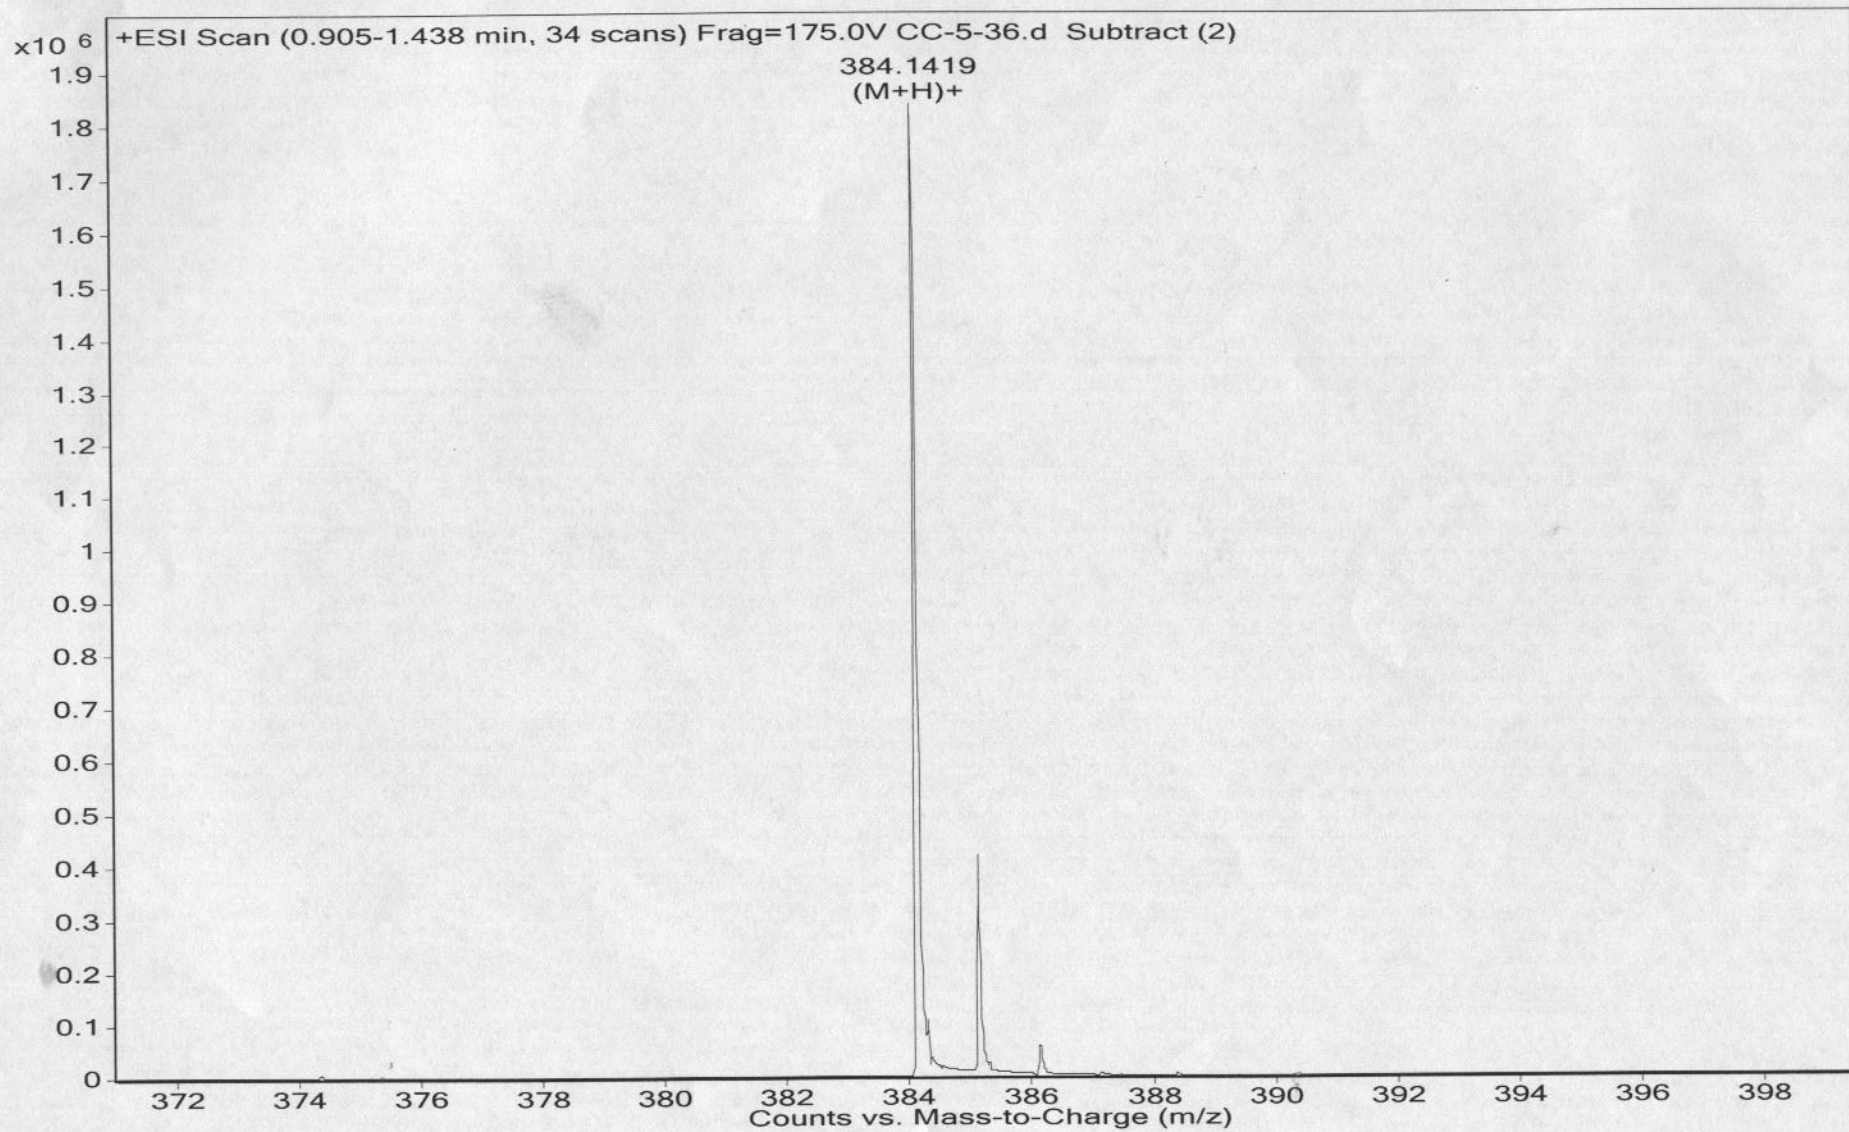

zc-5-19  
PROTON

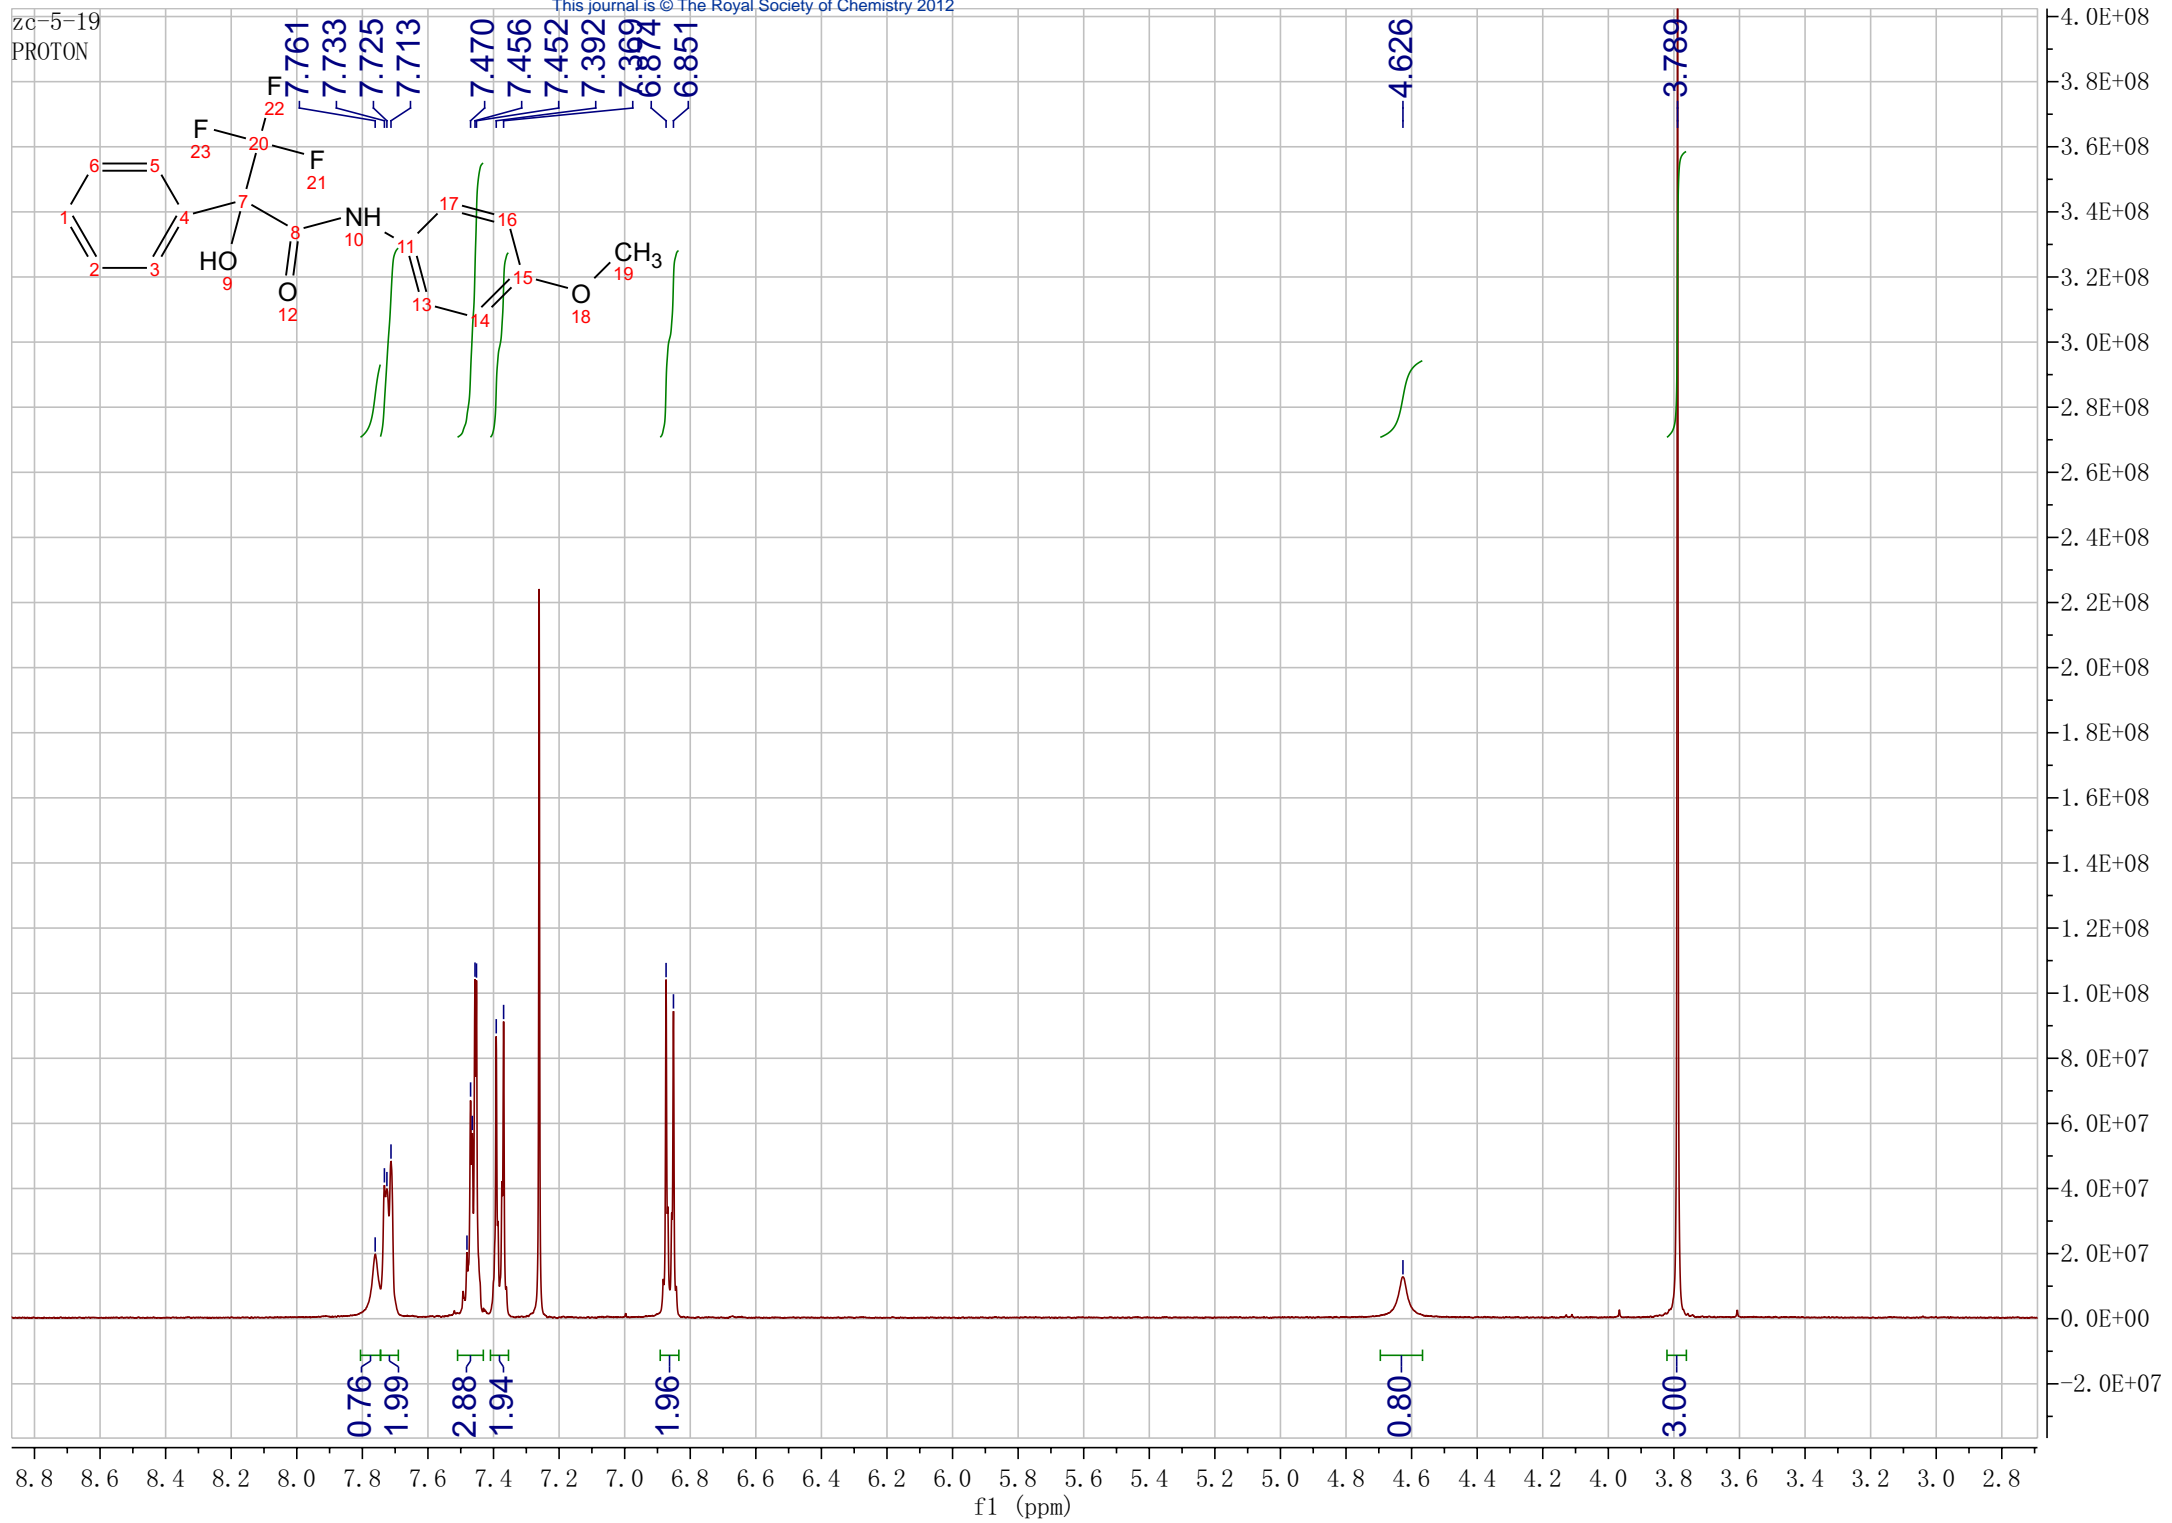

zc-5-19  
C13CPD

Electronic Supplementary Material (ESI) for Green Chemistry  
This journal is © The Royal Society of Chemistry 2012

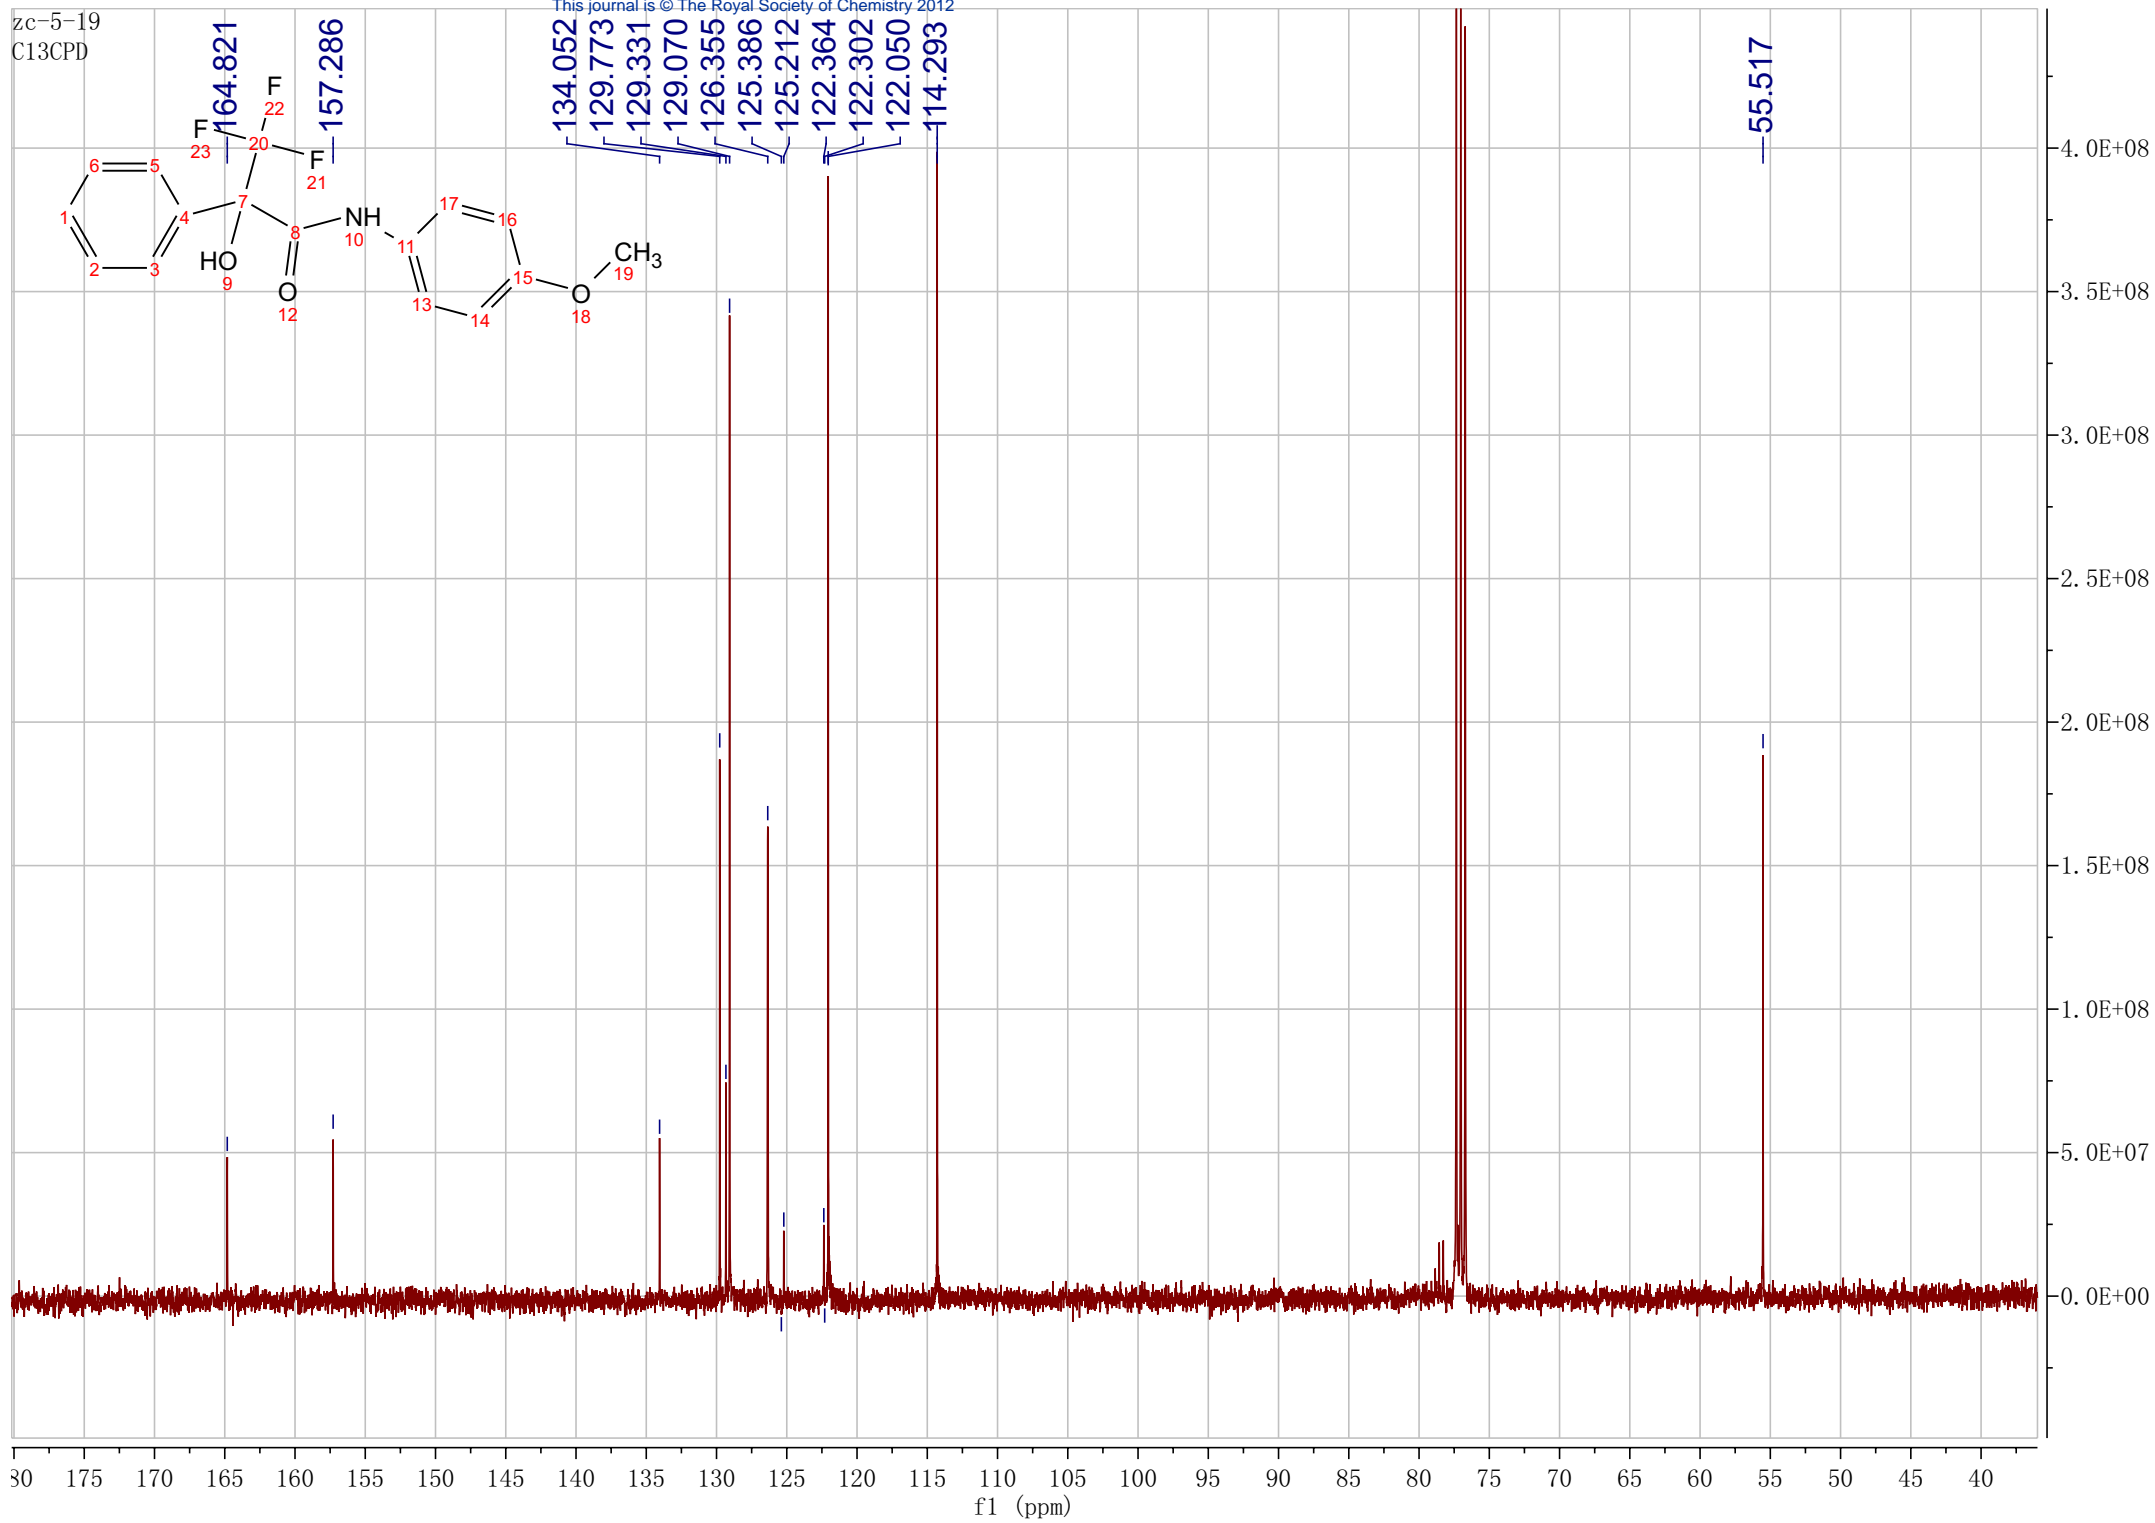

zc-5-19  
F19CPD

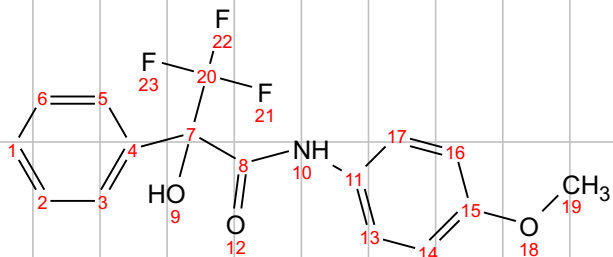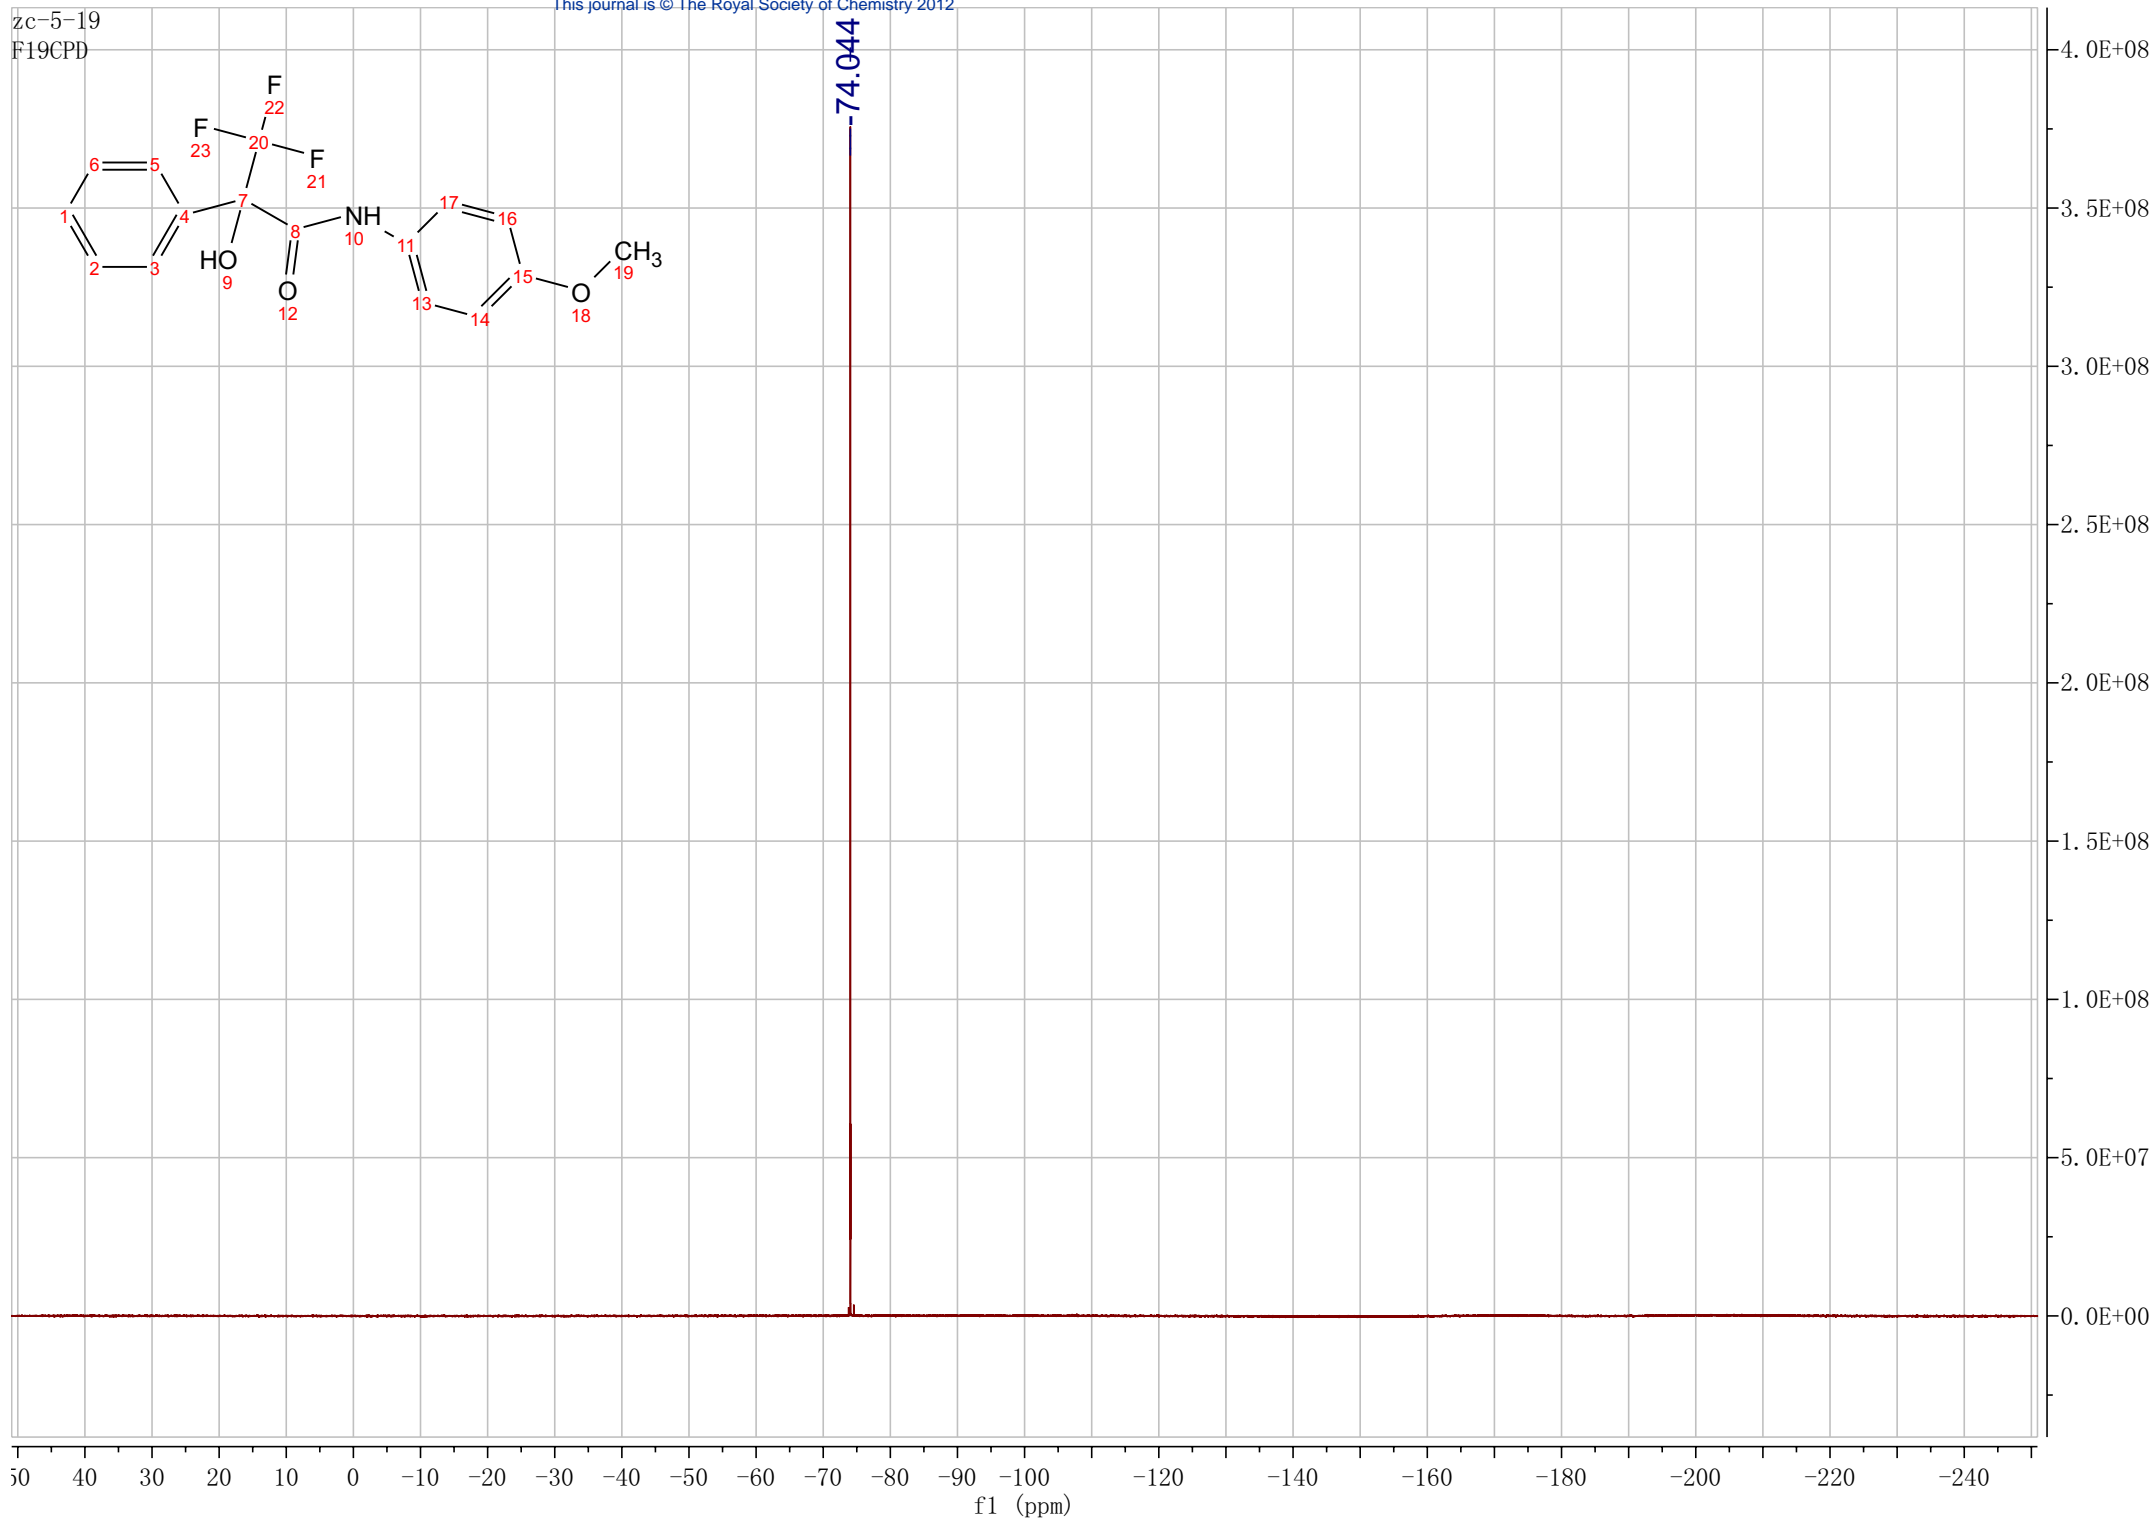

Varian QFT-ESI  
File: Zc-5-25\_ESI.trans

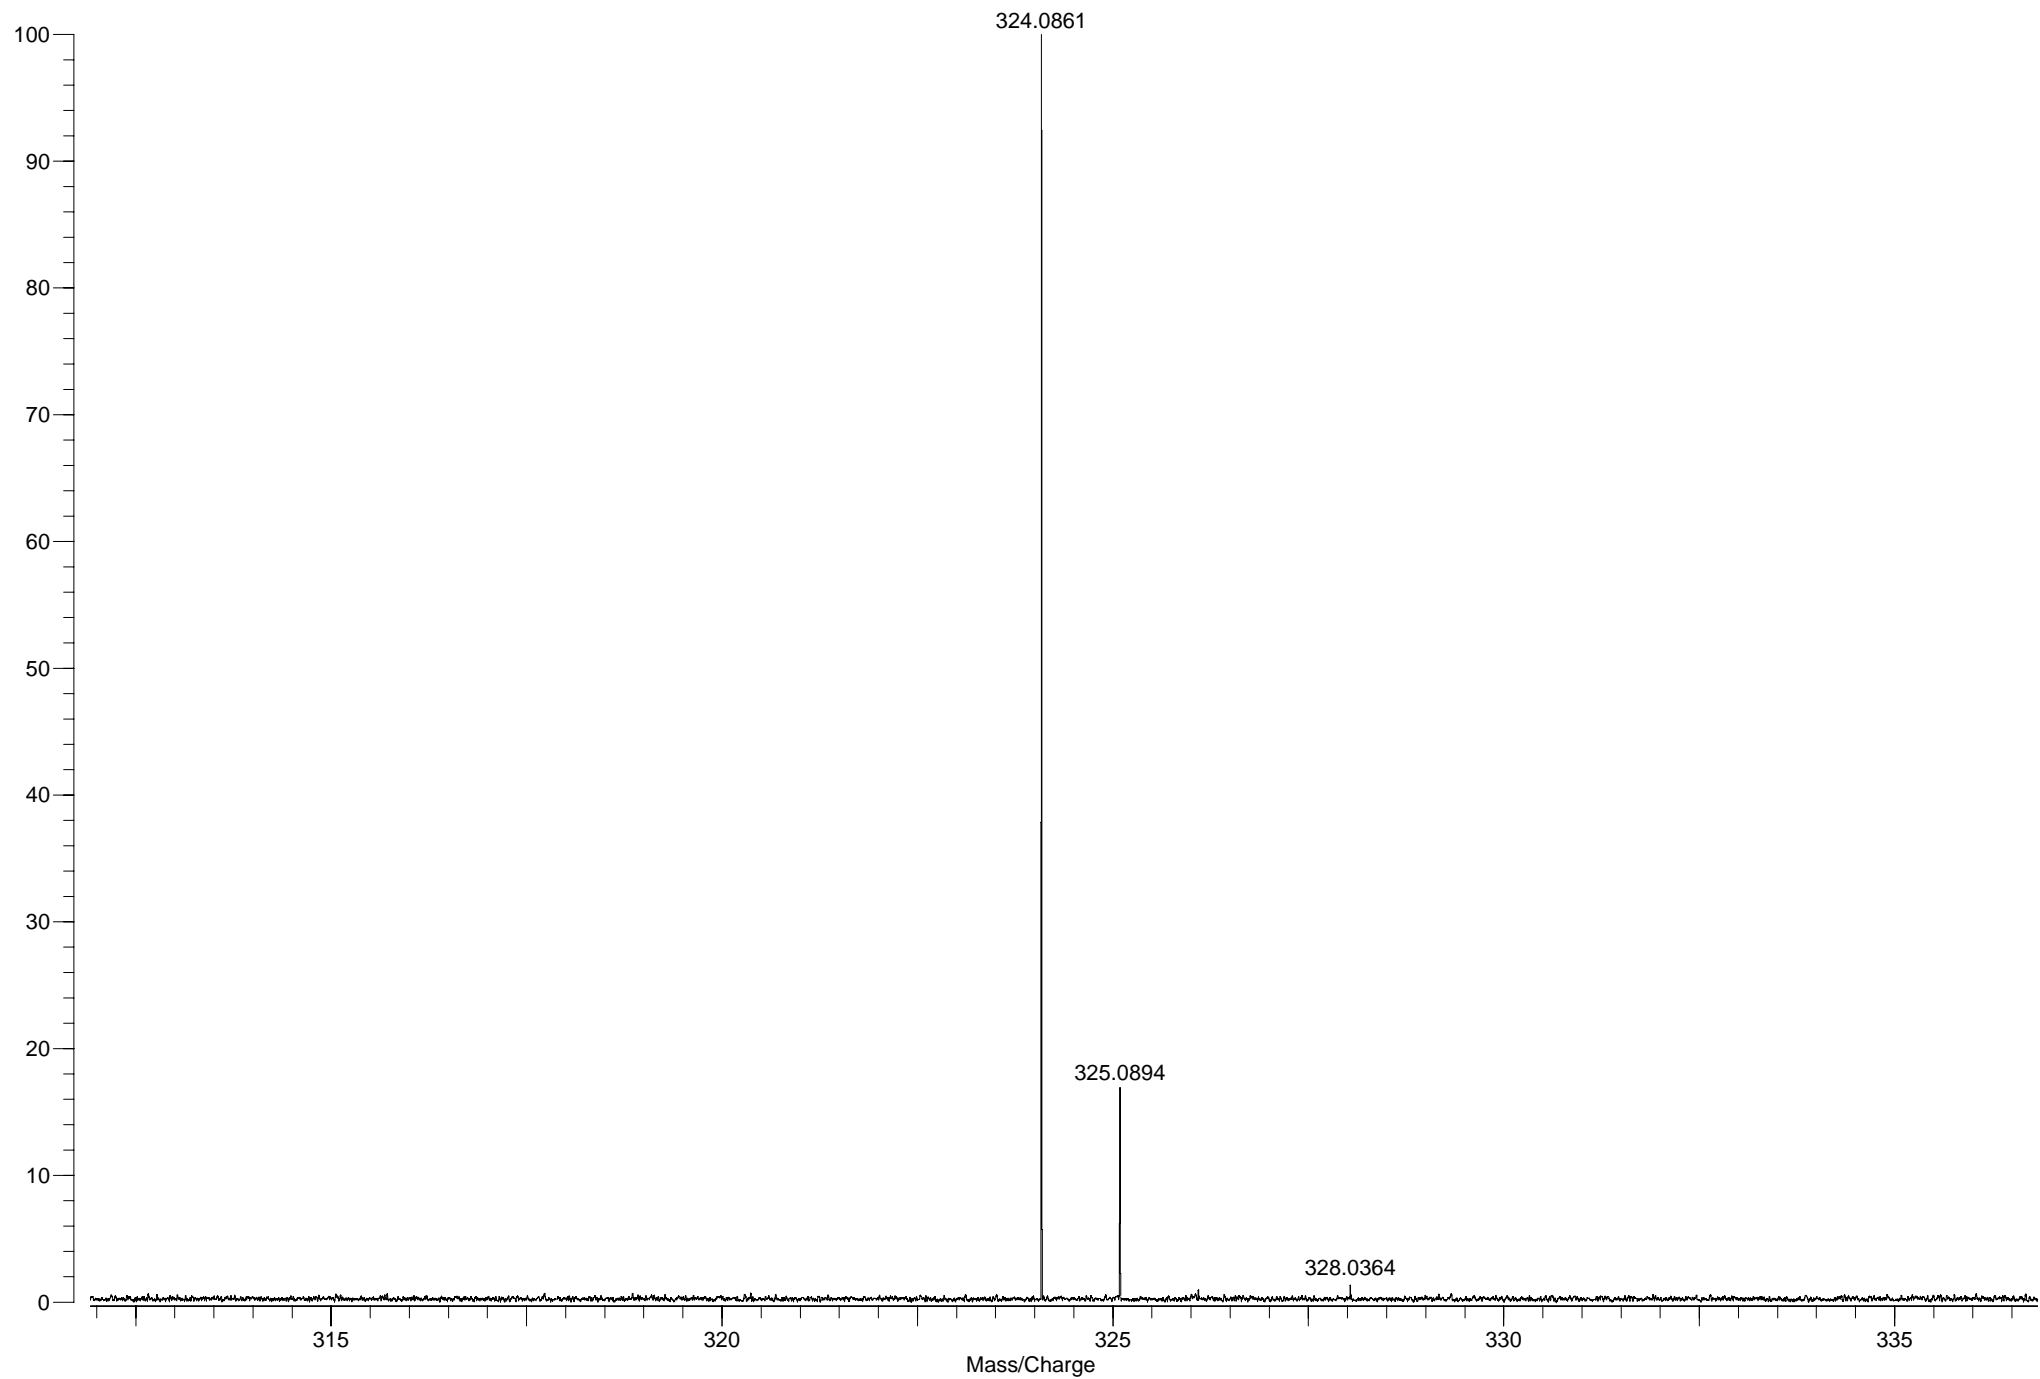

zc-5-30-2  
PROTON

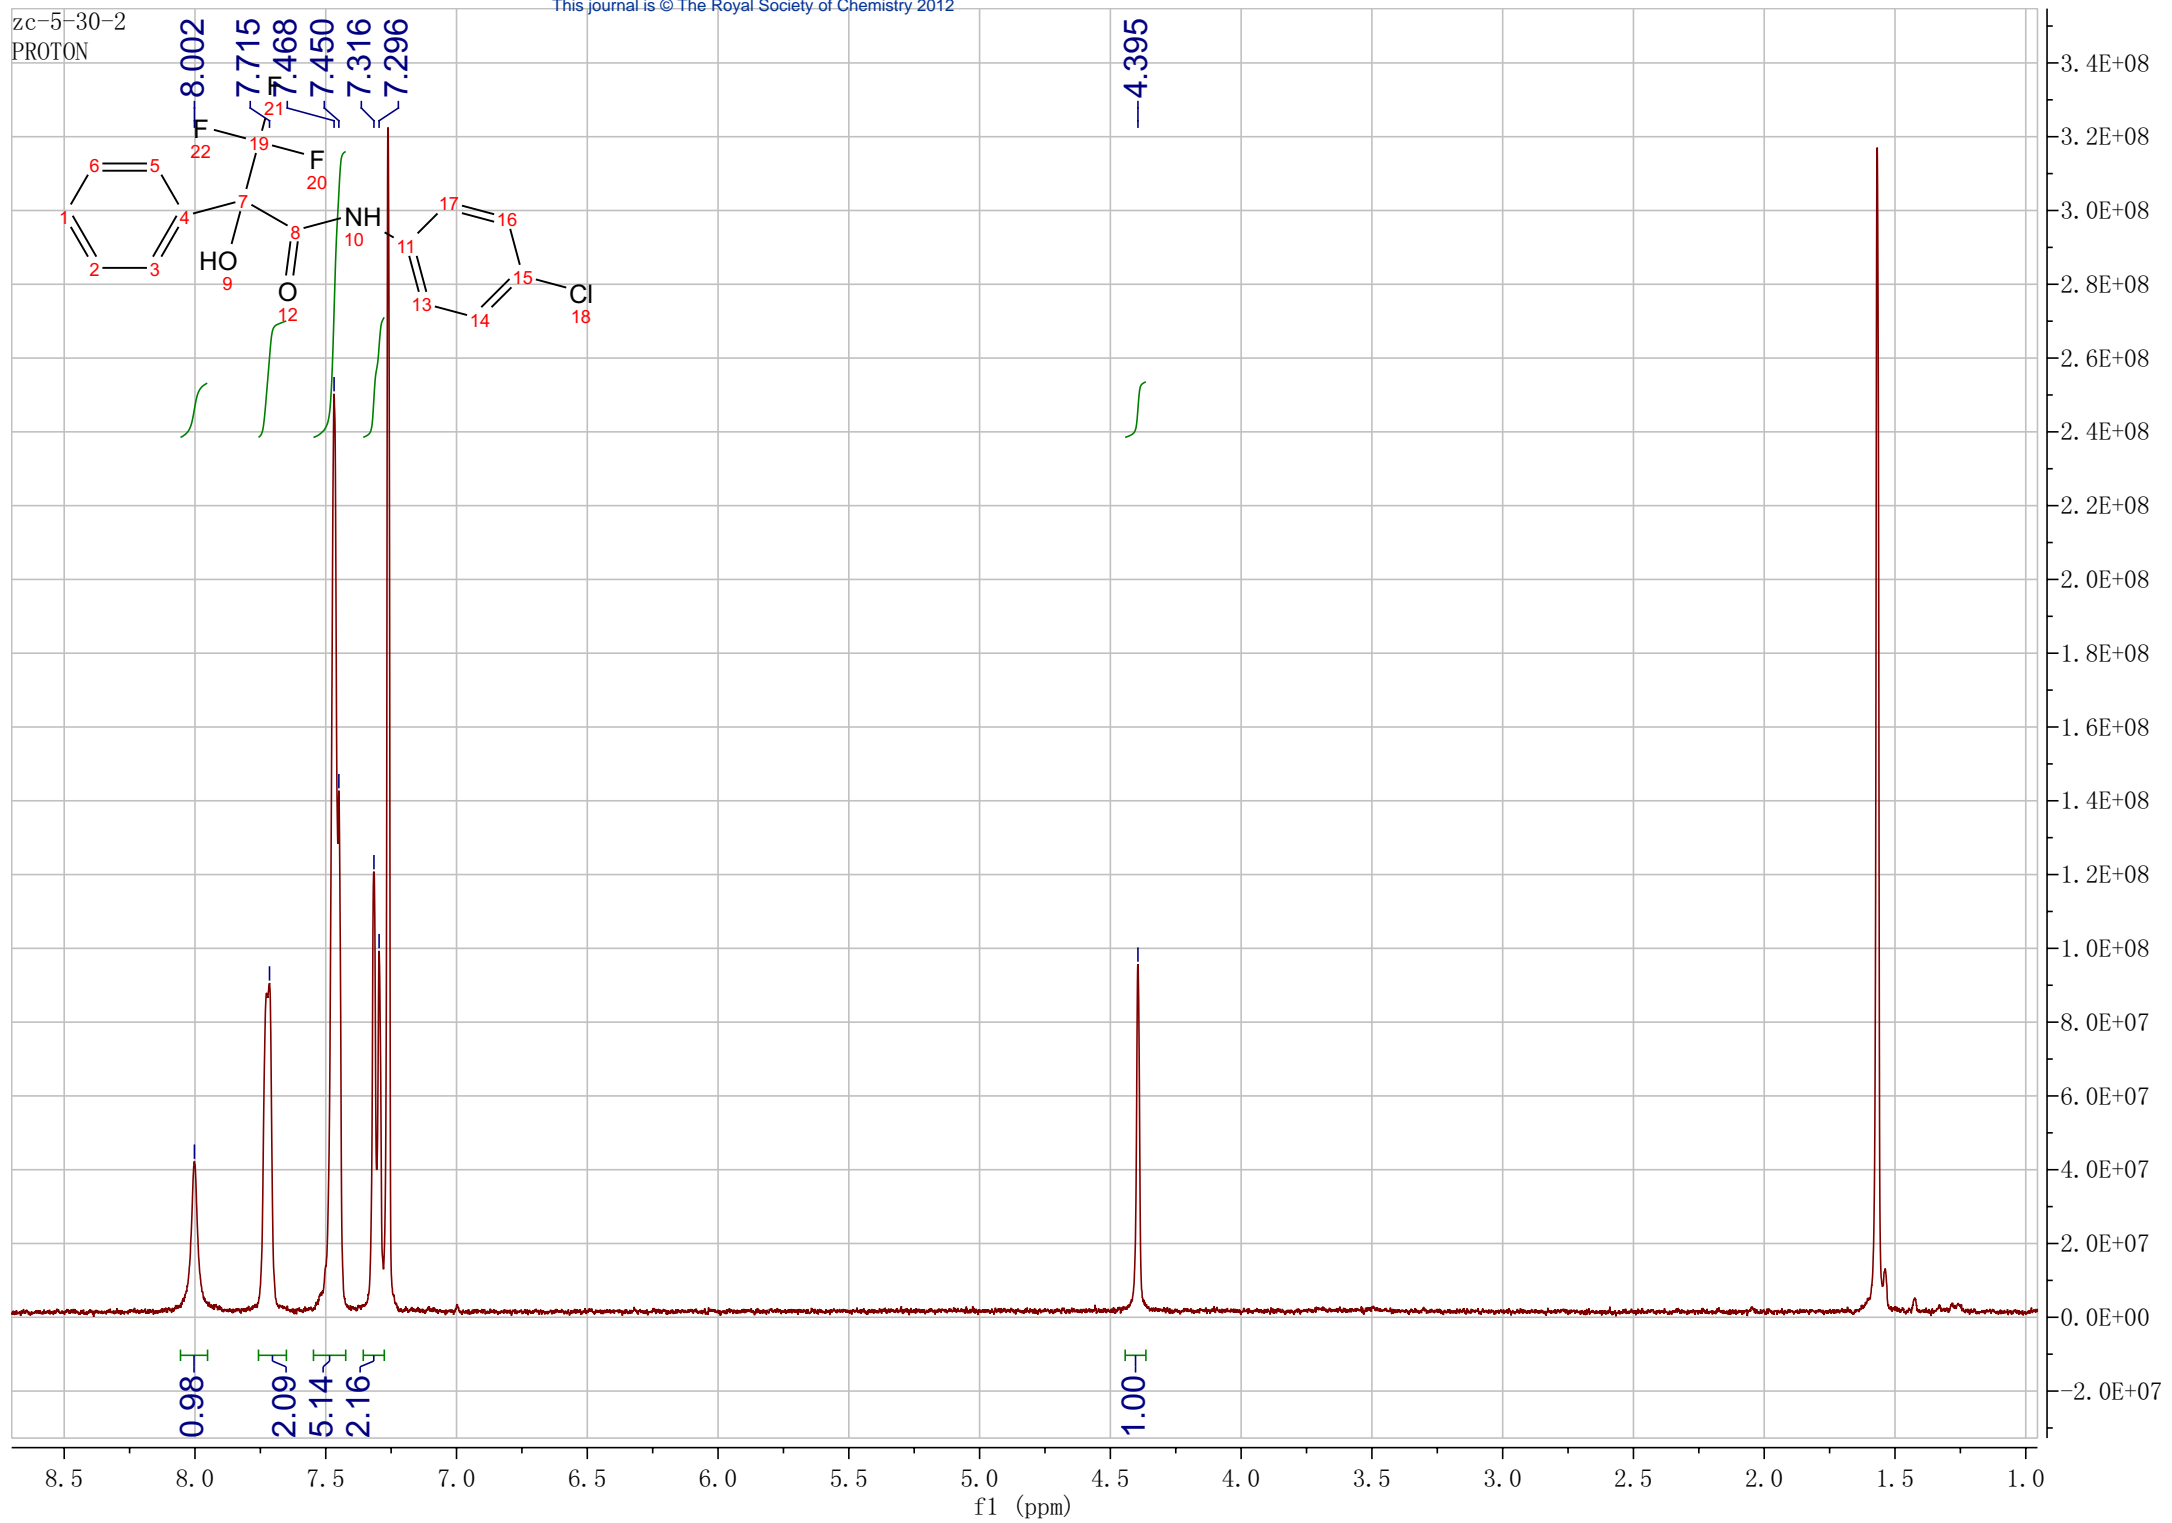



ZC-5-30-2-C  
C13CPD

Electronic Supplementary Material (ESI) for Green Chemistry  
This journal is © The Royal Society of Chemistry 2012

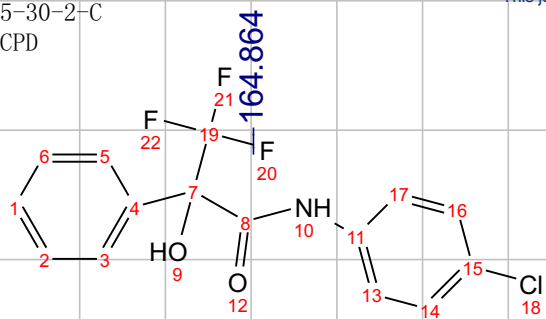

134.897  
133.604  
130.665  
129.974  
129.223  
129.146  
126.261  
125.052  
121.440

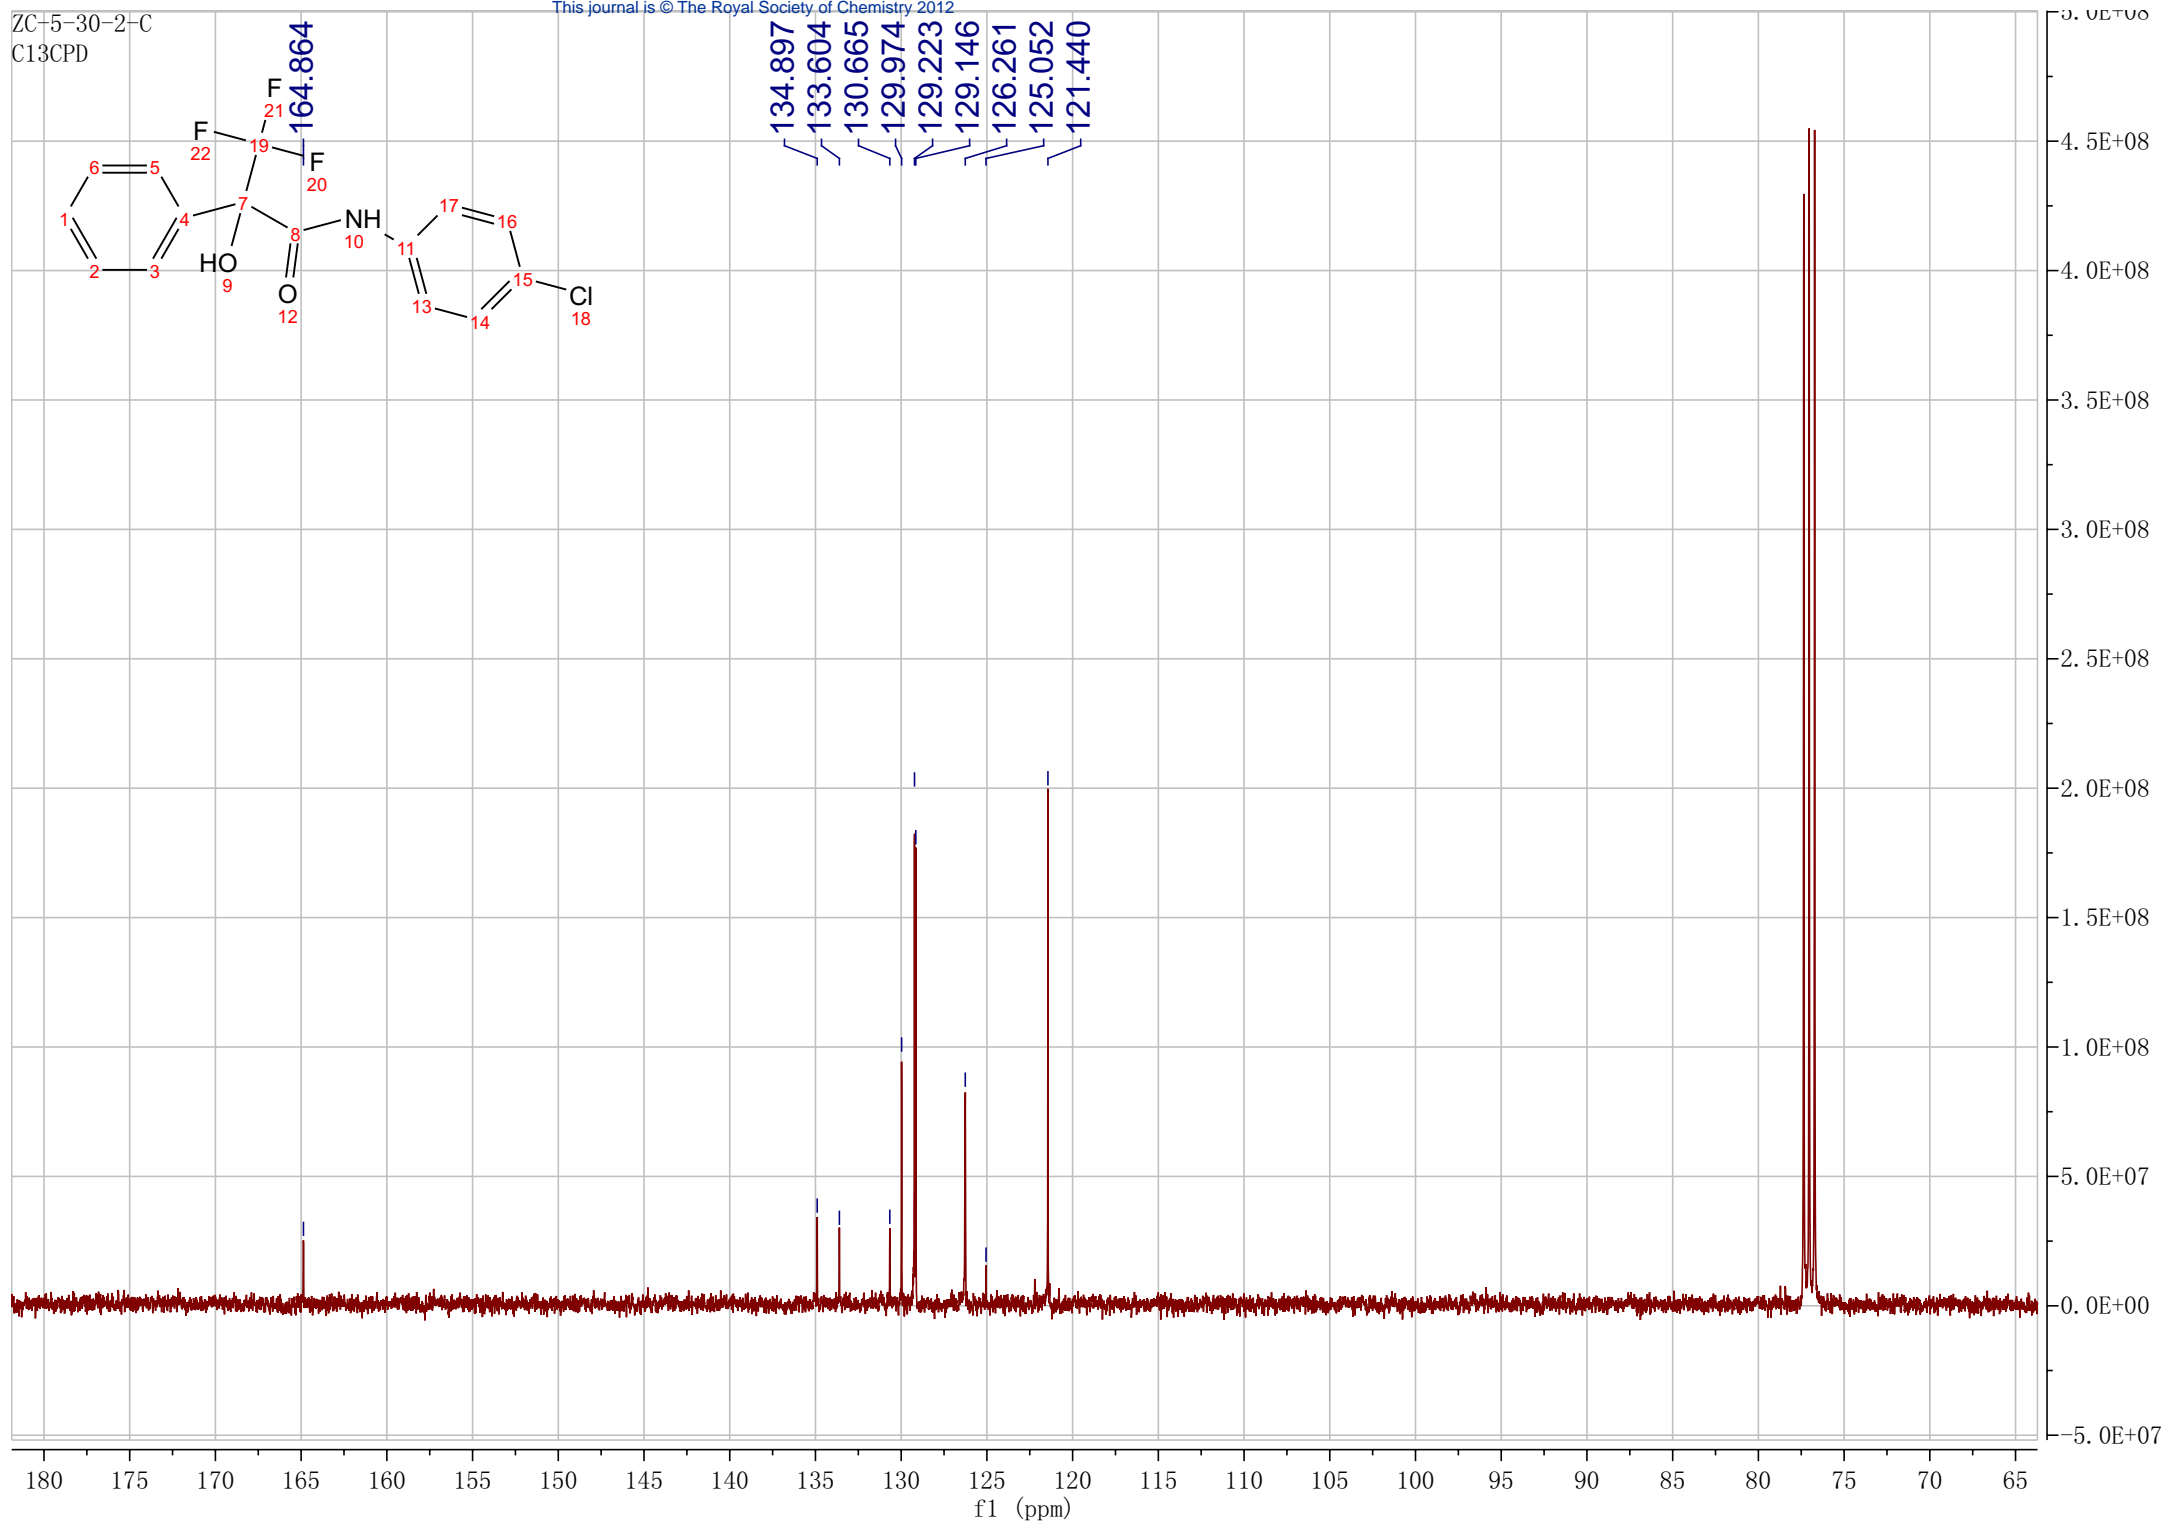

zc-5-30-2  
F19CPD

Electronic Supplementary Material (ESI) for Green Chemistry  
This journal is © The Royal Society of Chemistry 2012

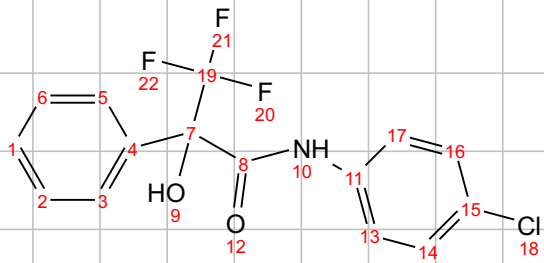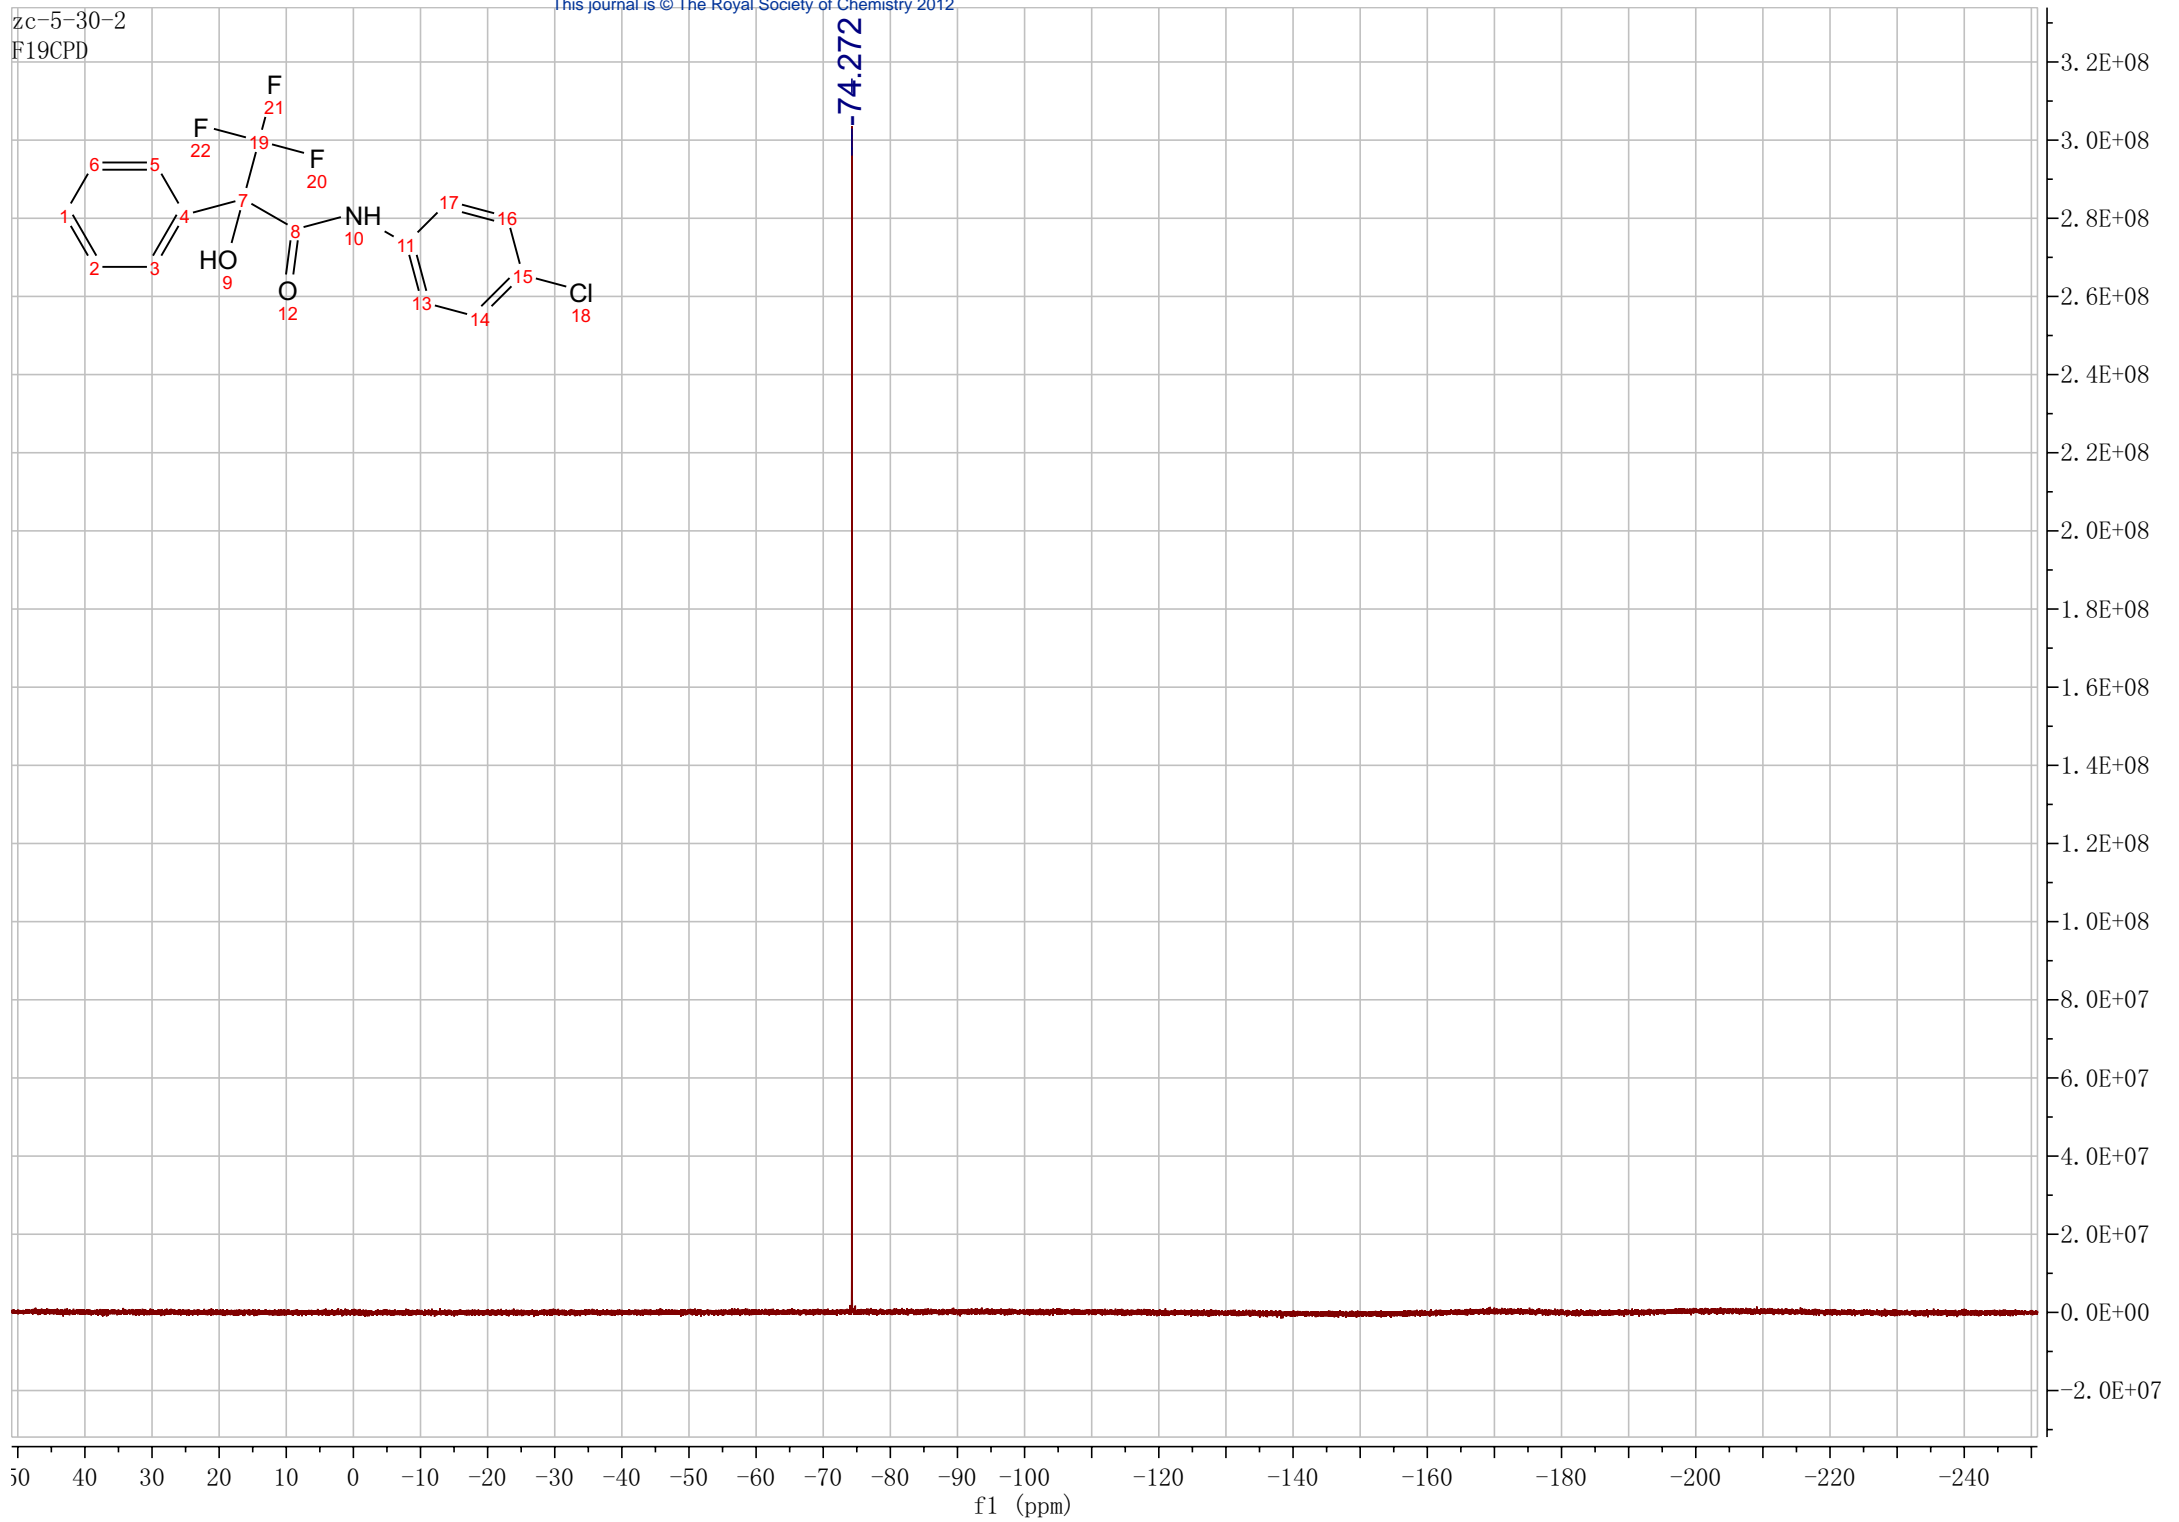

Varian QFT-ESI  
File: Zc-5-30-2\_ESI.trans

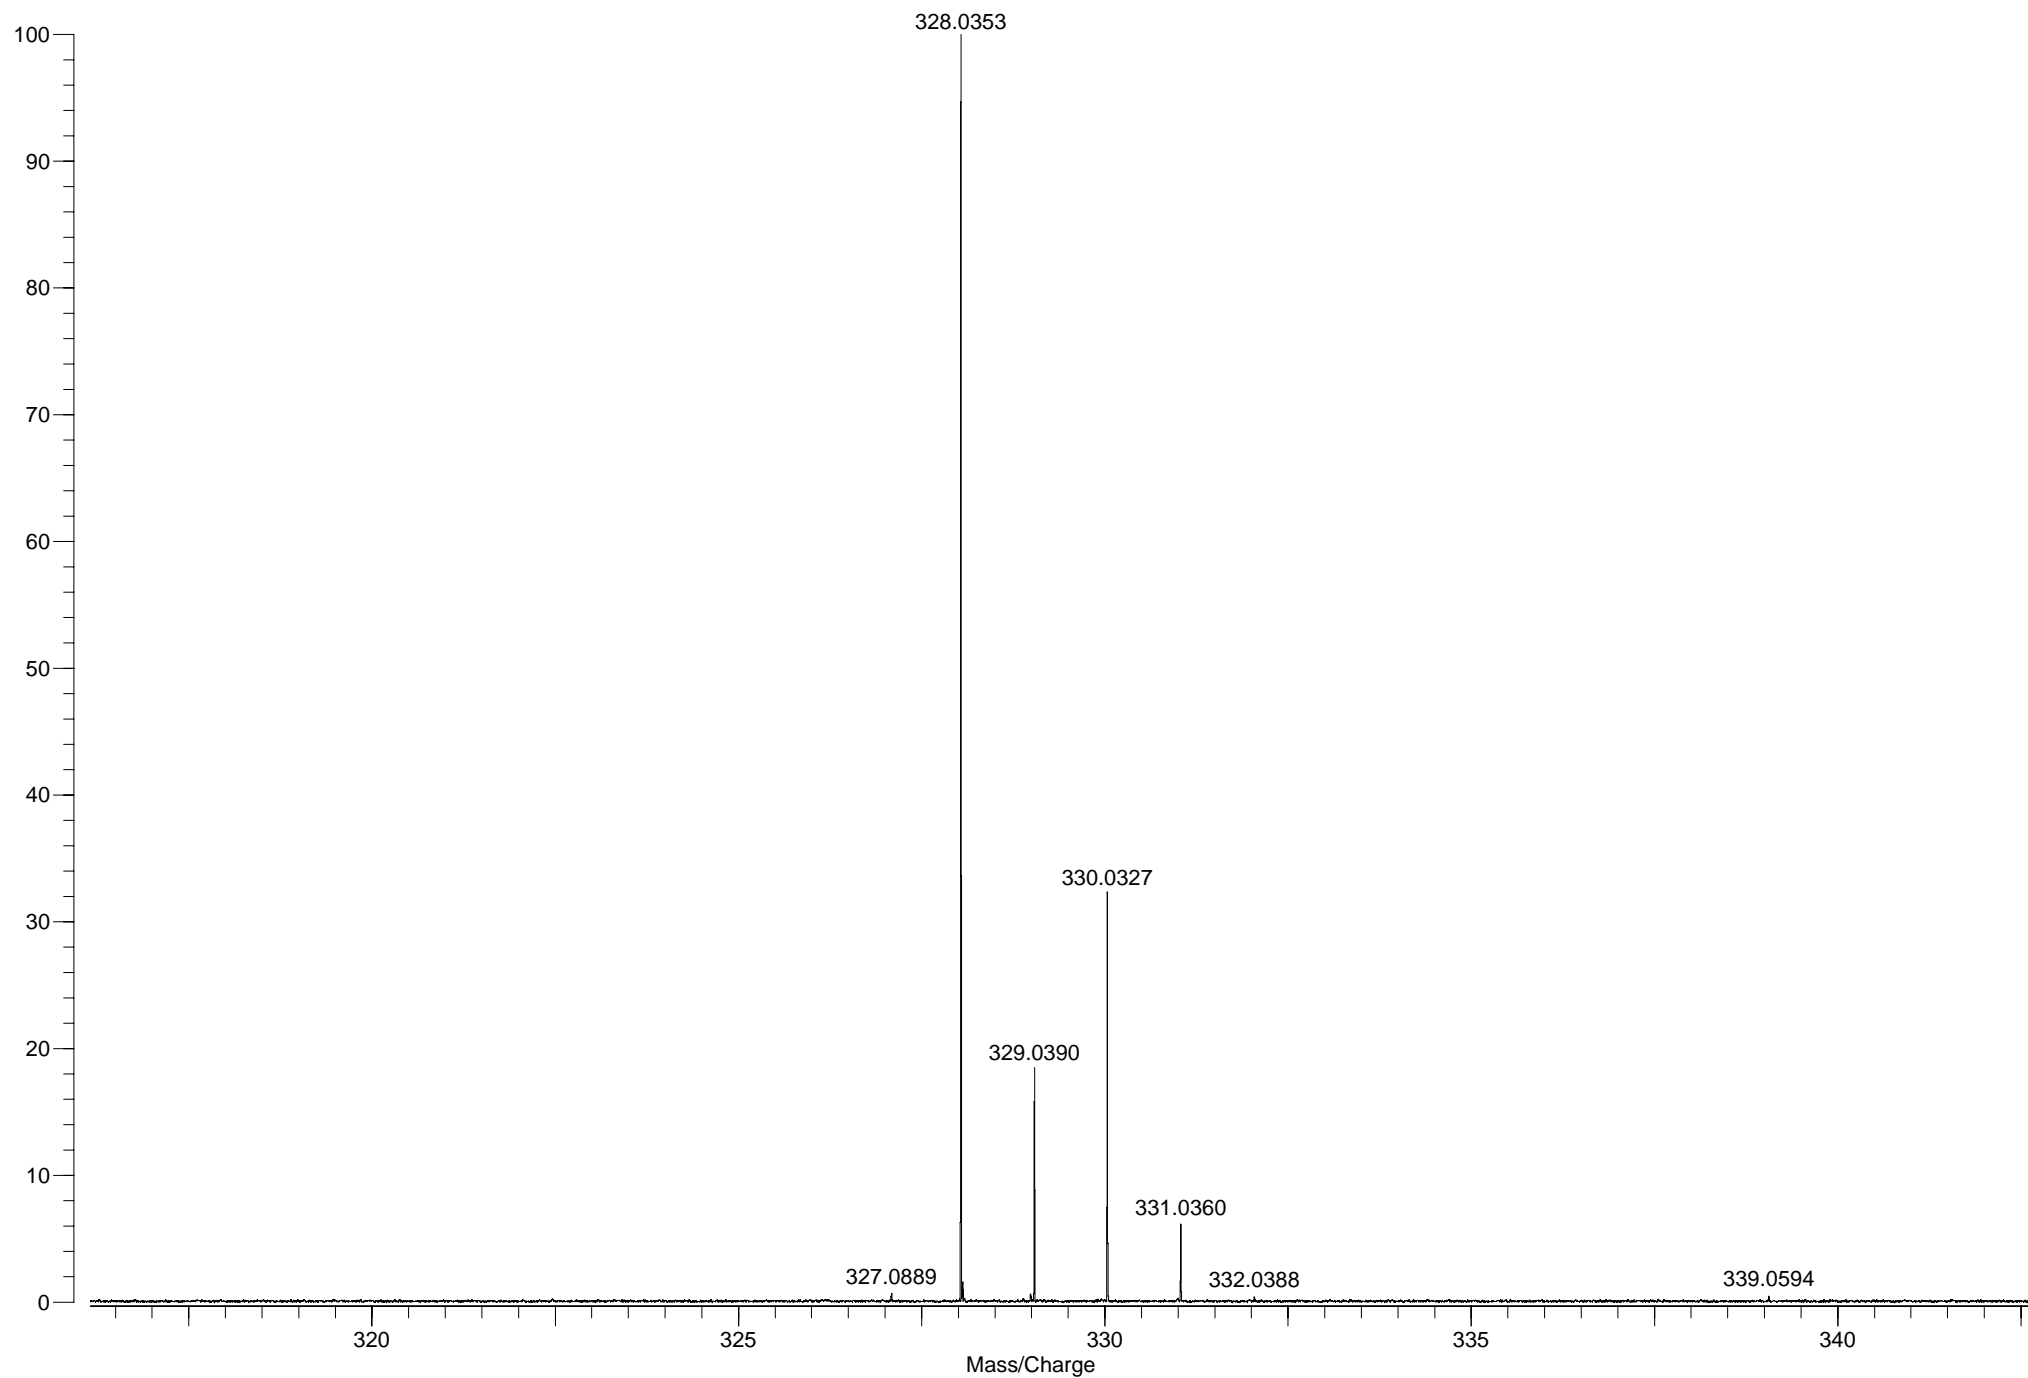

zc-5-30-2  
PROTON



ZC-5-30-2-C  
C13CPD

Electronic Supplementary Material (ESI) for Green Chemistry  
This journal is © The Royal Society of Chemistry 2012

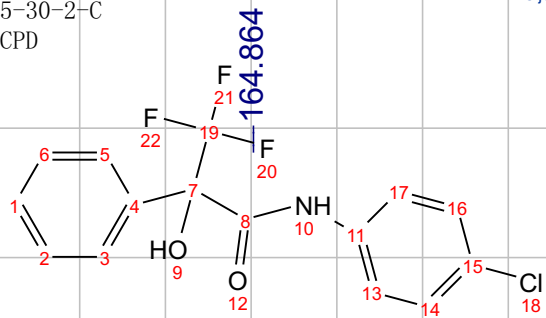

134.897  
133.604  
130.665  
129.974  
129.223  
129.146  
126.261  
125.052  
121.440

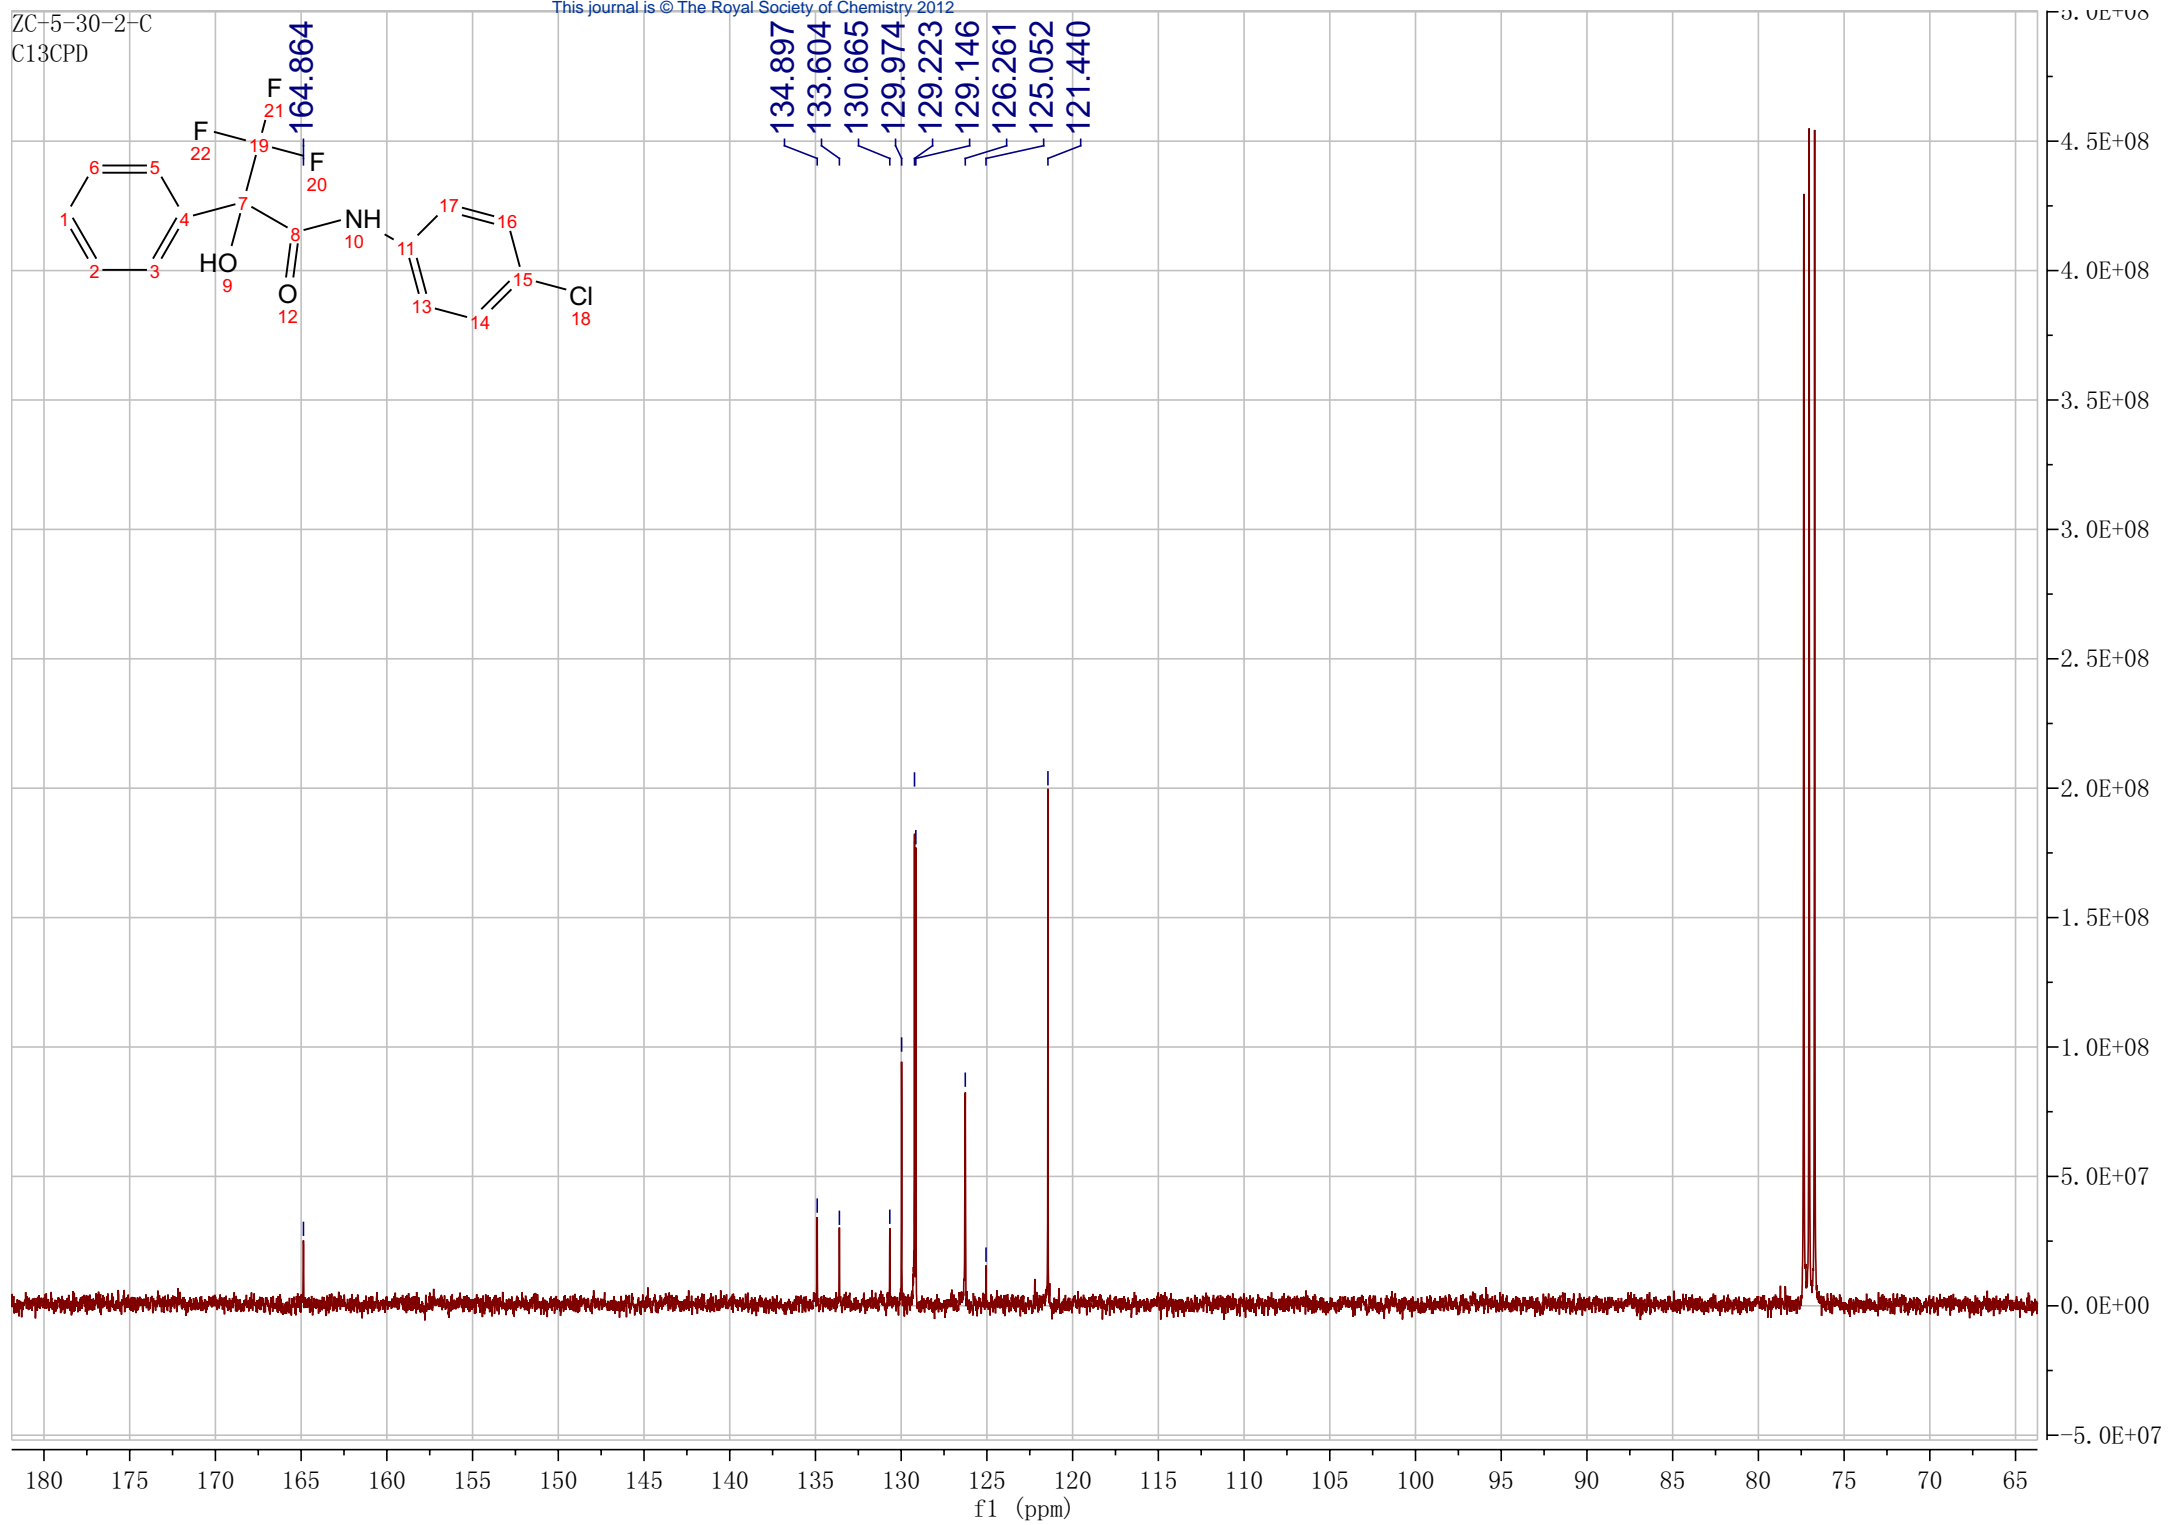

zc-5-30-2  
F19CPD

Electronic Supplementary Material (ESI) for Green Chemistry  
This journal is © The Royal Society of Chemistry 2012

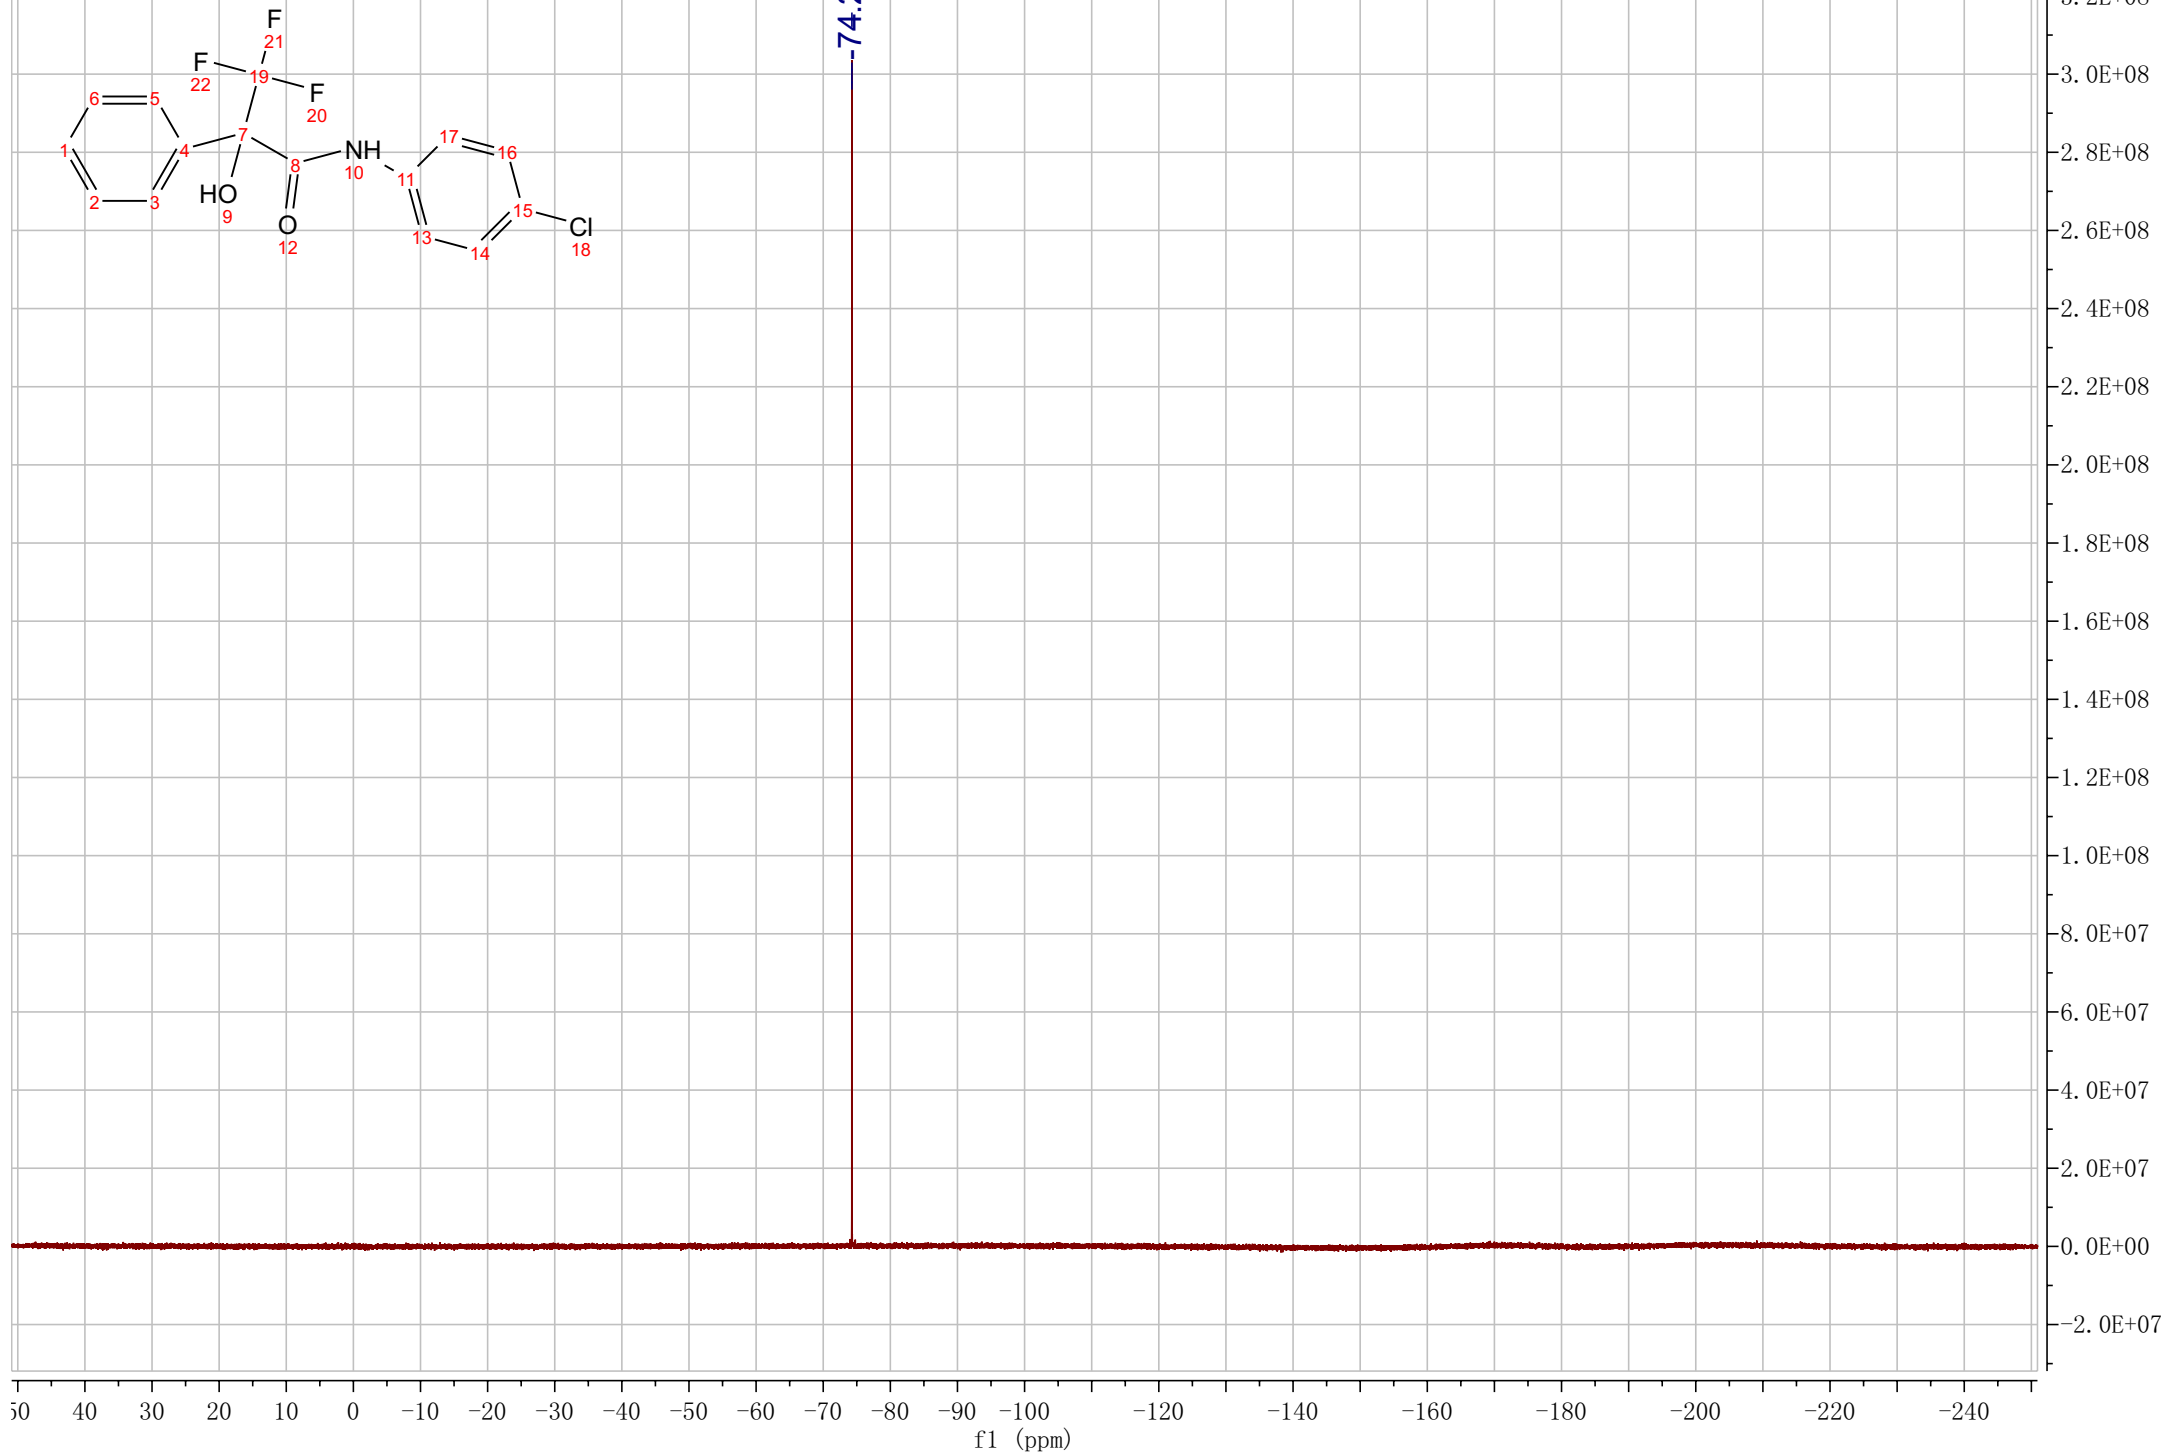

Varian ProMALDI  
File: Zc-3-29-2\_MALDI.trans

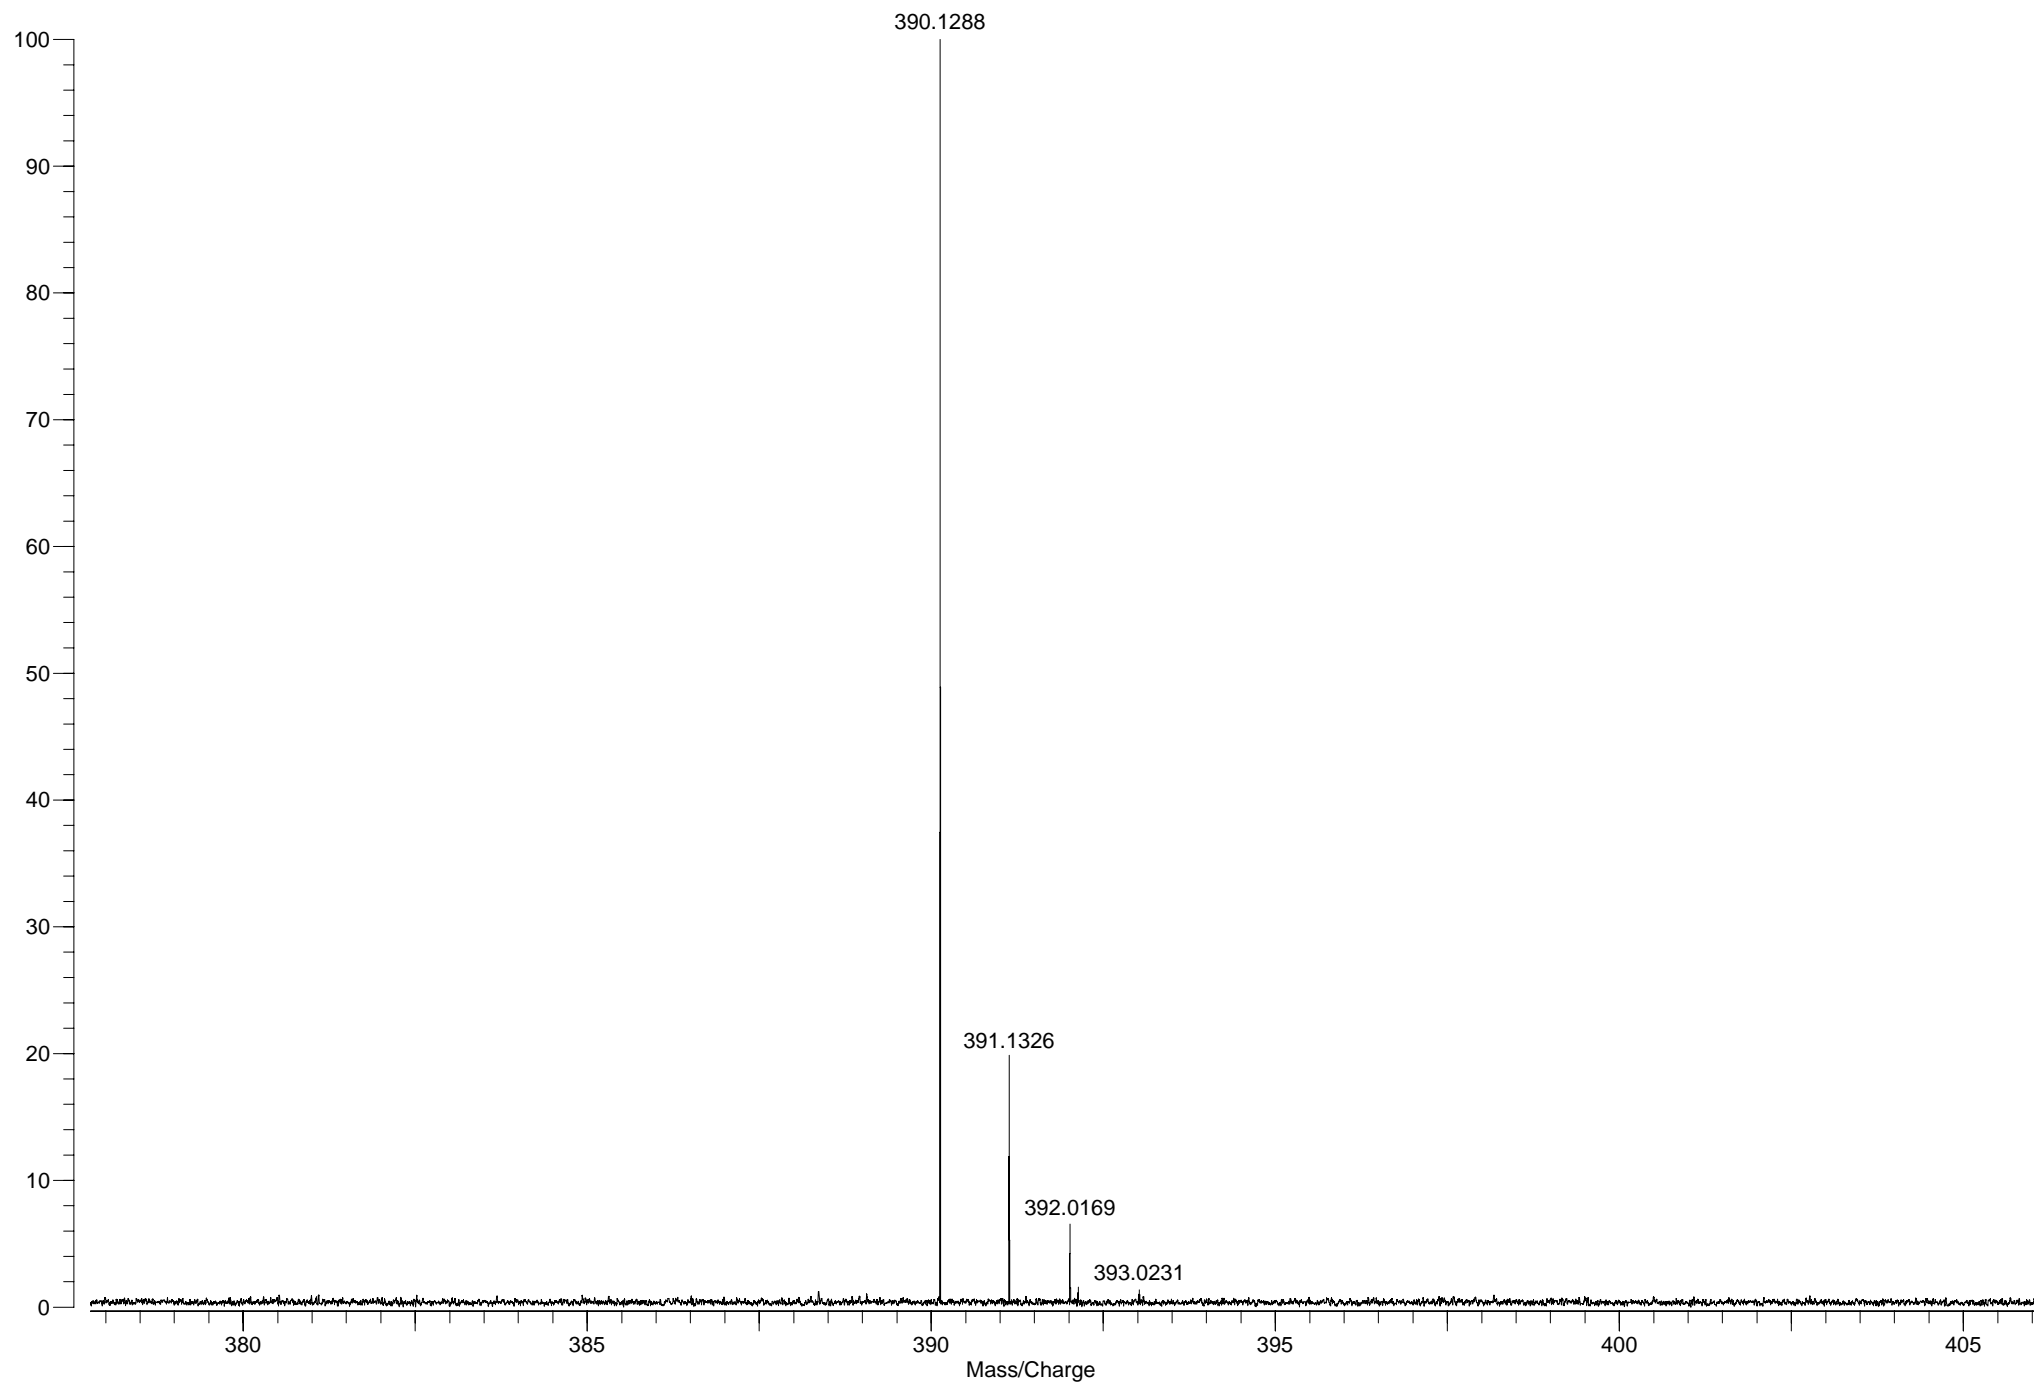

zc-4-1  
PROTON

Electronic Supplementary Material (ESI) for Green Chemistry  
This journal is © The Royal Society of Chemistry 2012

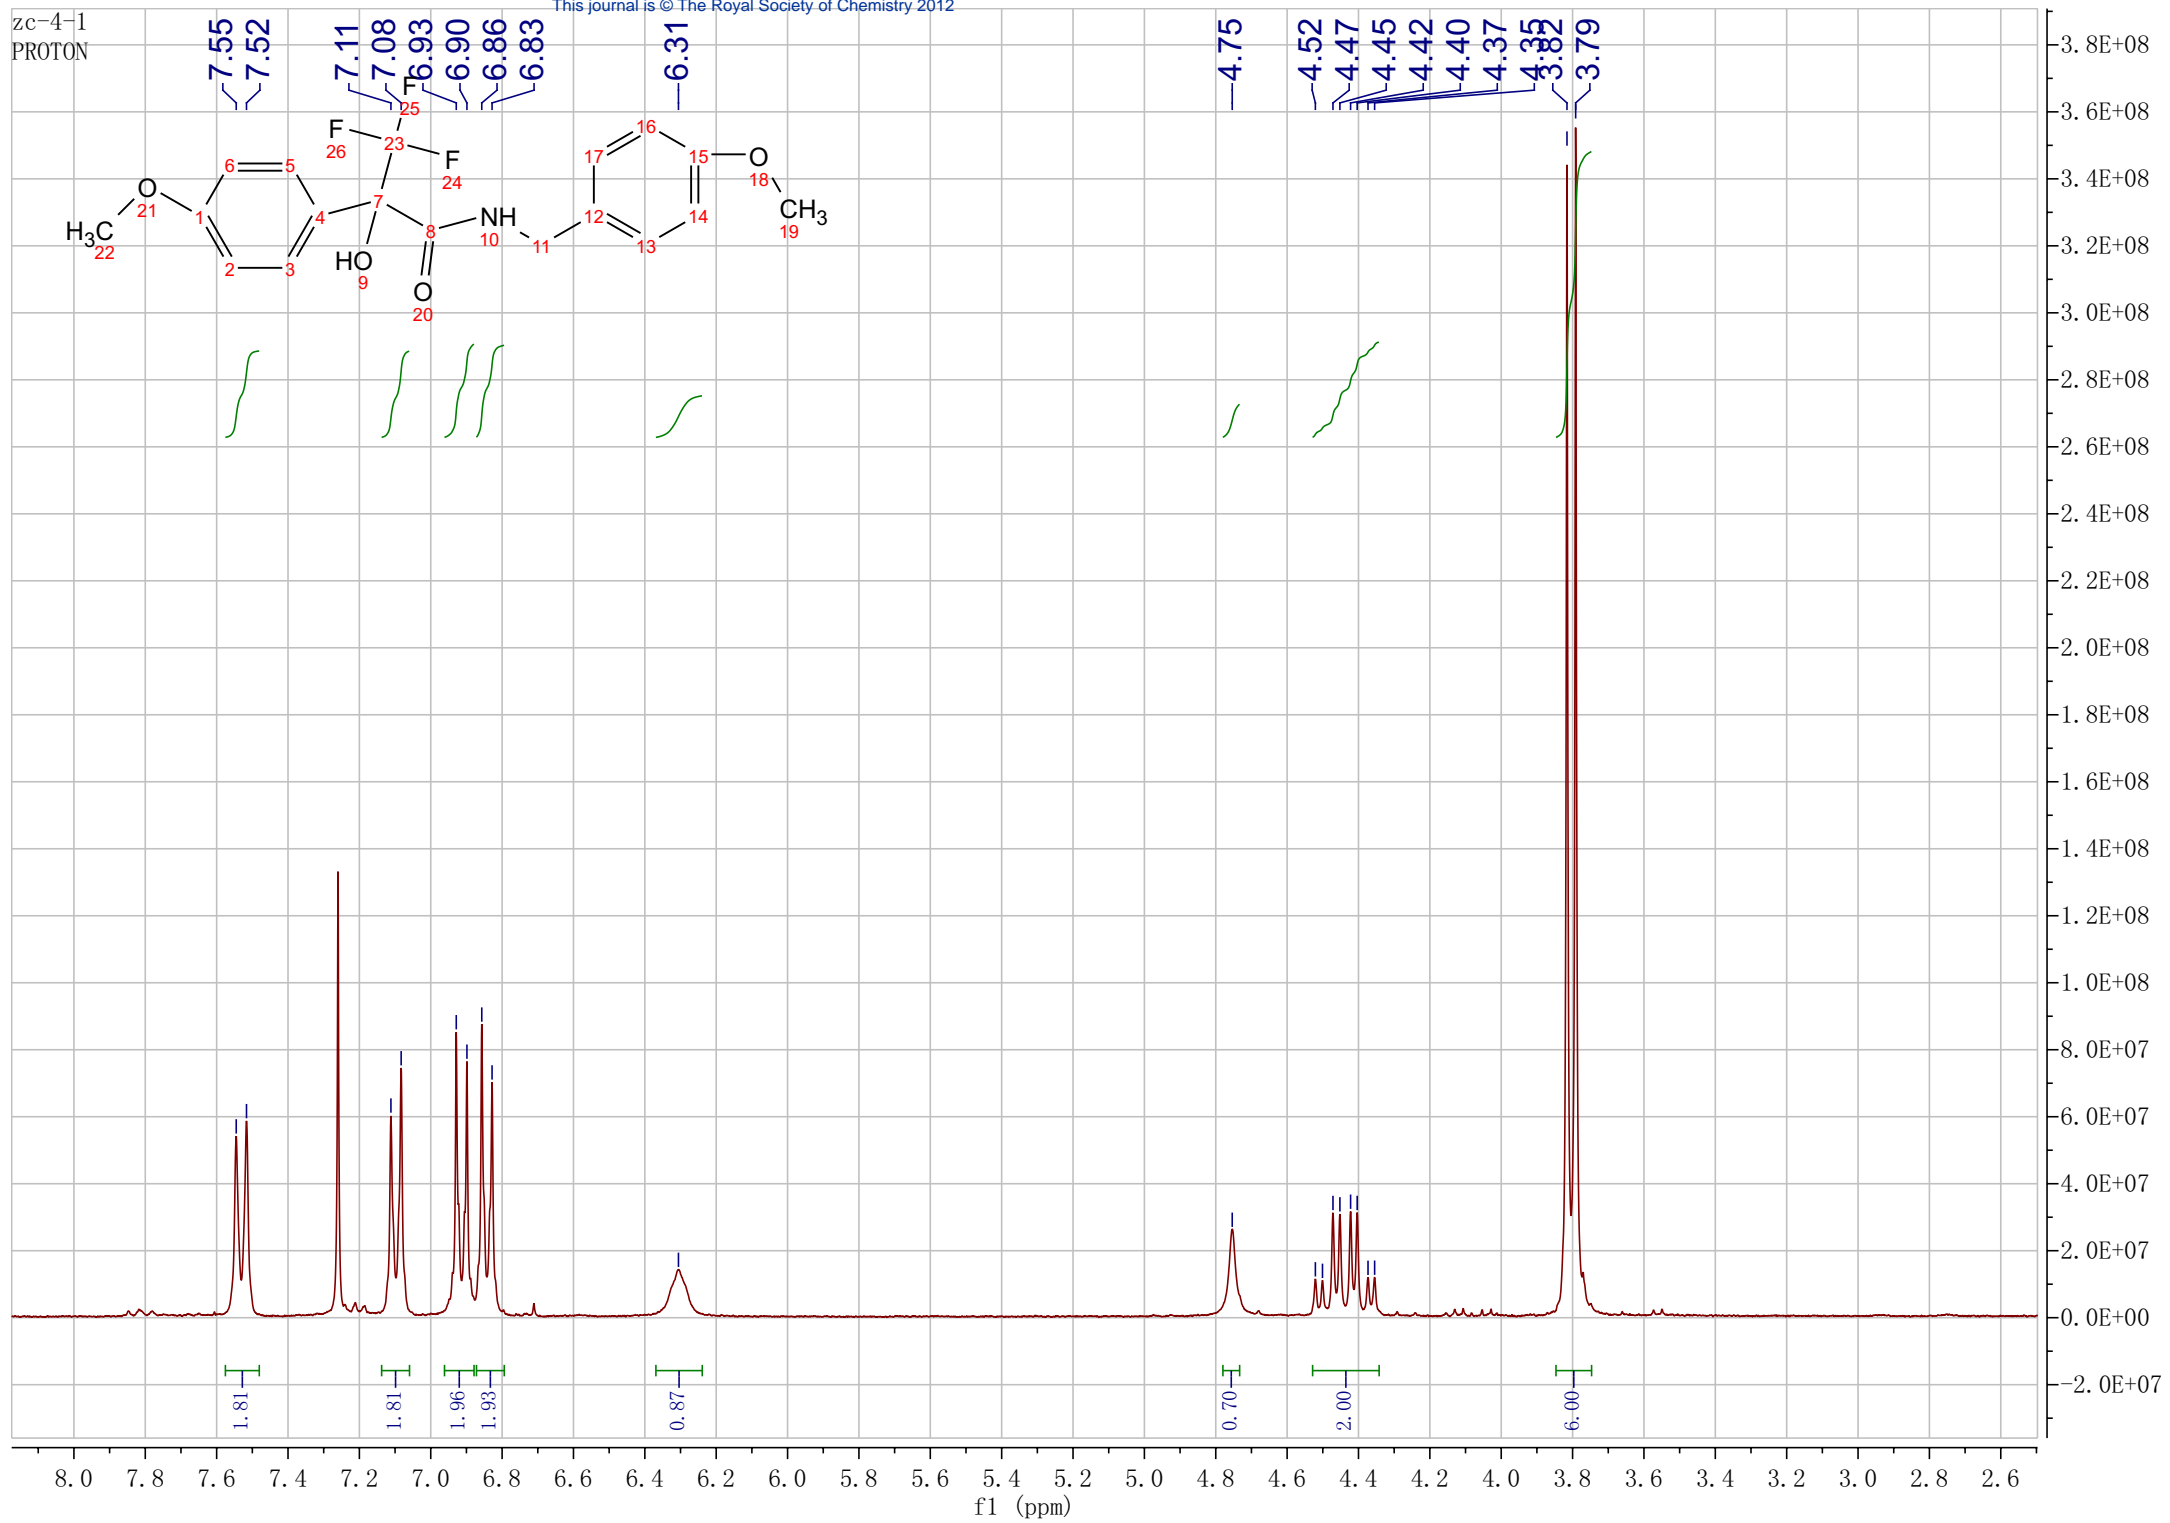



zc-4-1-F  
C13CPD

Electronic Supplementary Material (ESI) for Green Chemistry  
This journal is © The Royal Society of Chemistry 2012

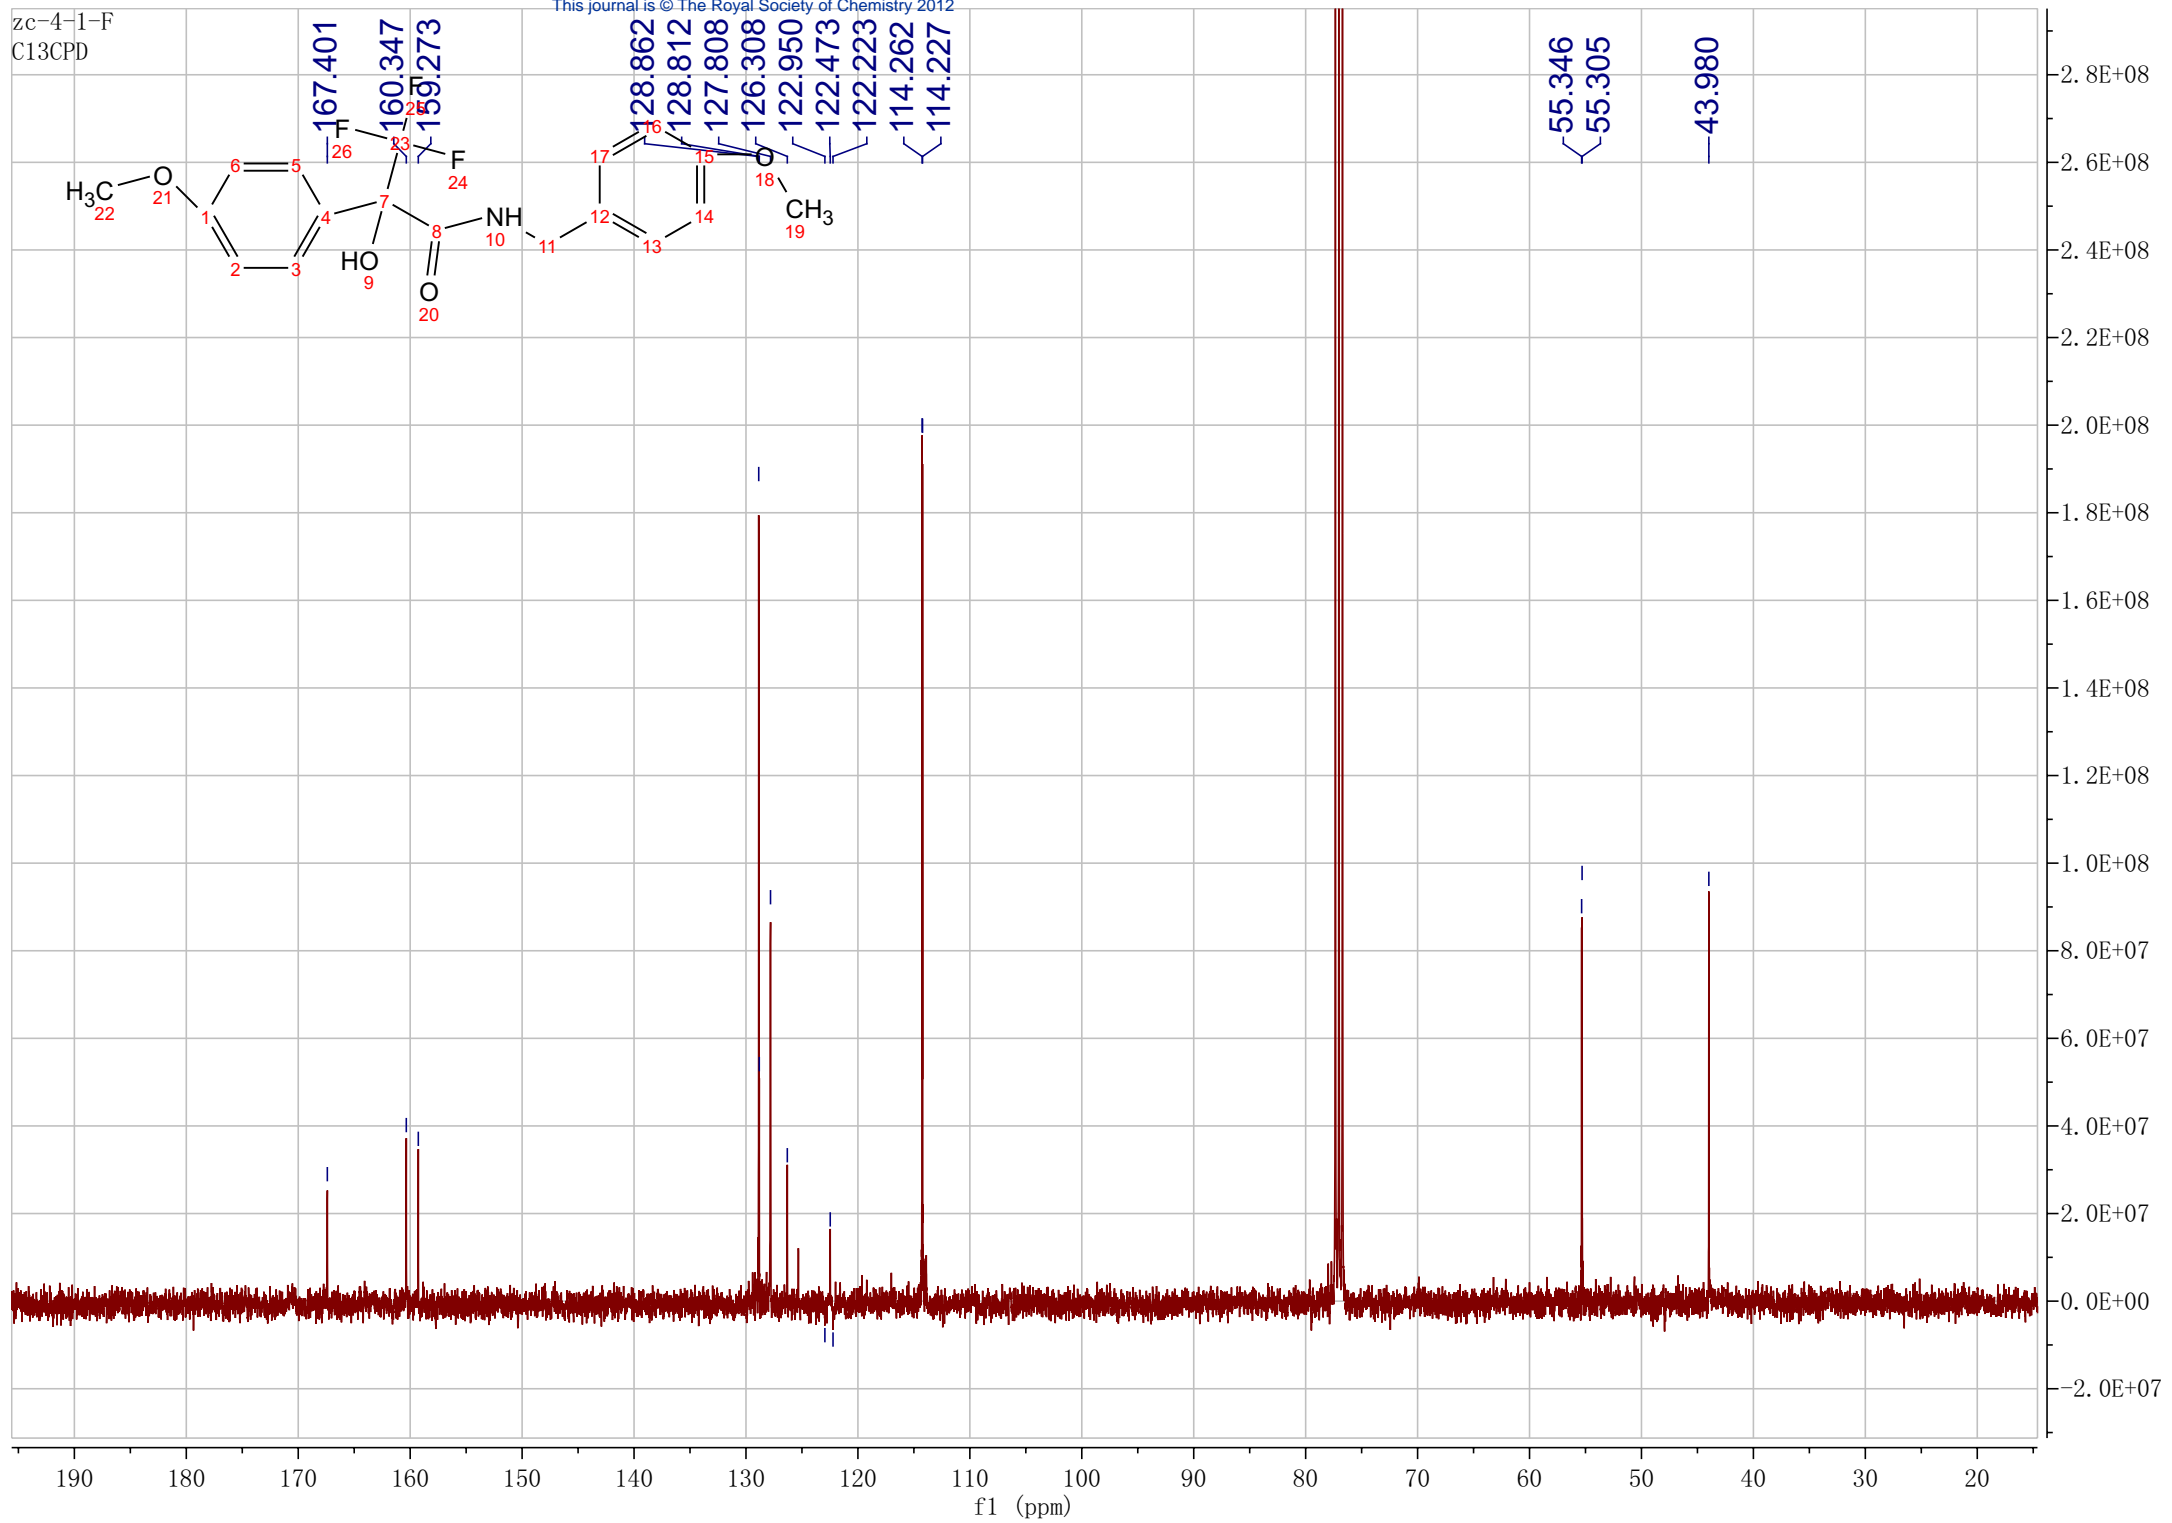

zc-4-1-F  
F19CPD

Electronic Supplementary Material (ESI) for Green Chemistry  
This journal is © The Royal Society of Chemistry 2012

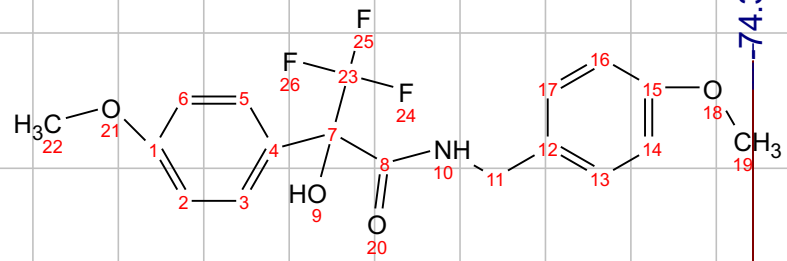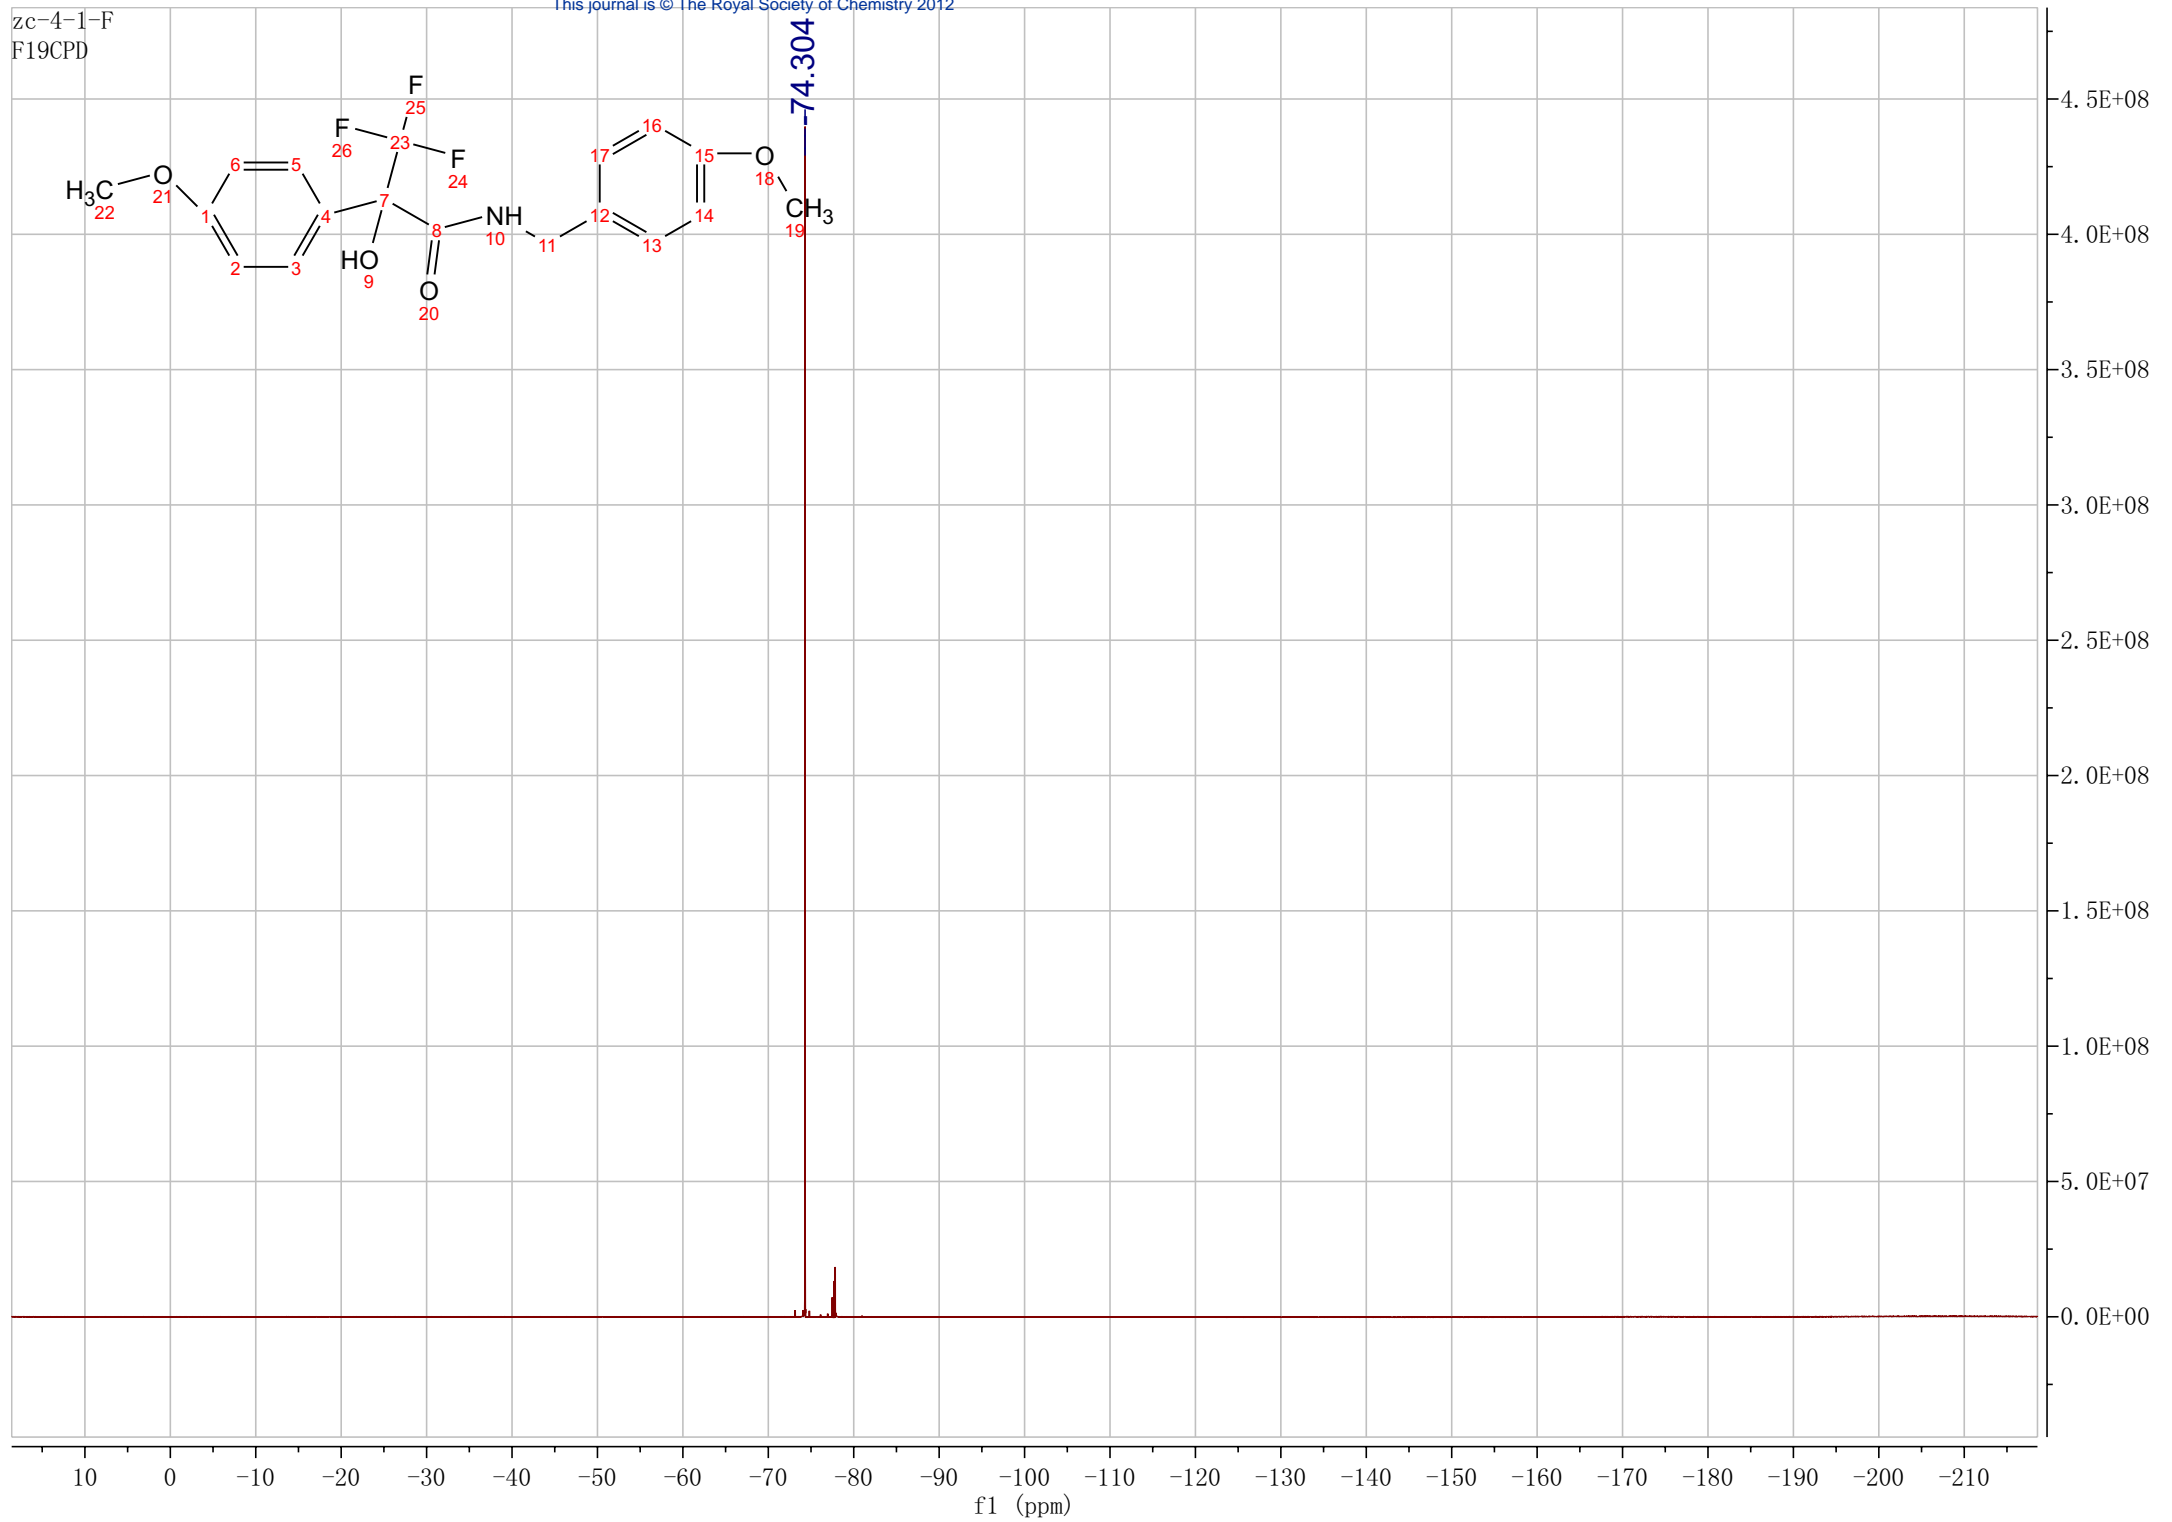

Varian QFT-ESI  
File: Zc-4-1\_ESI.trans

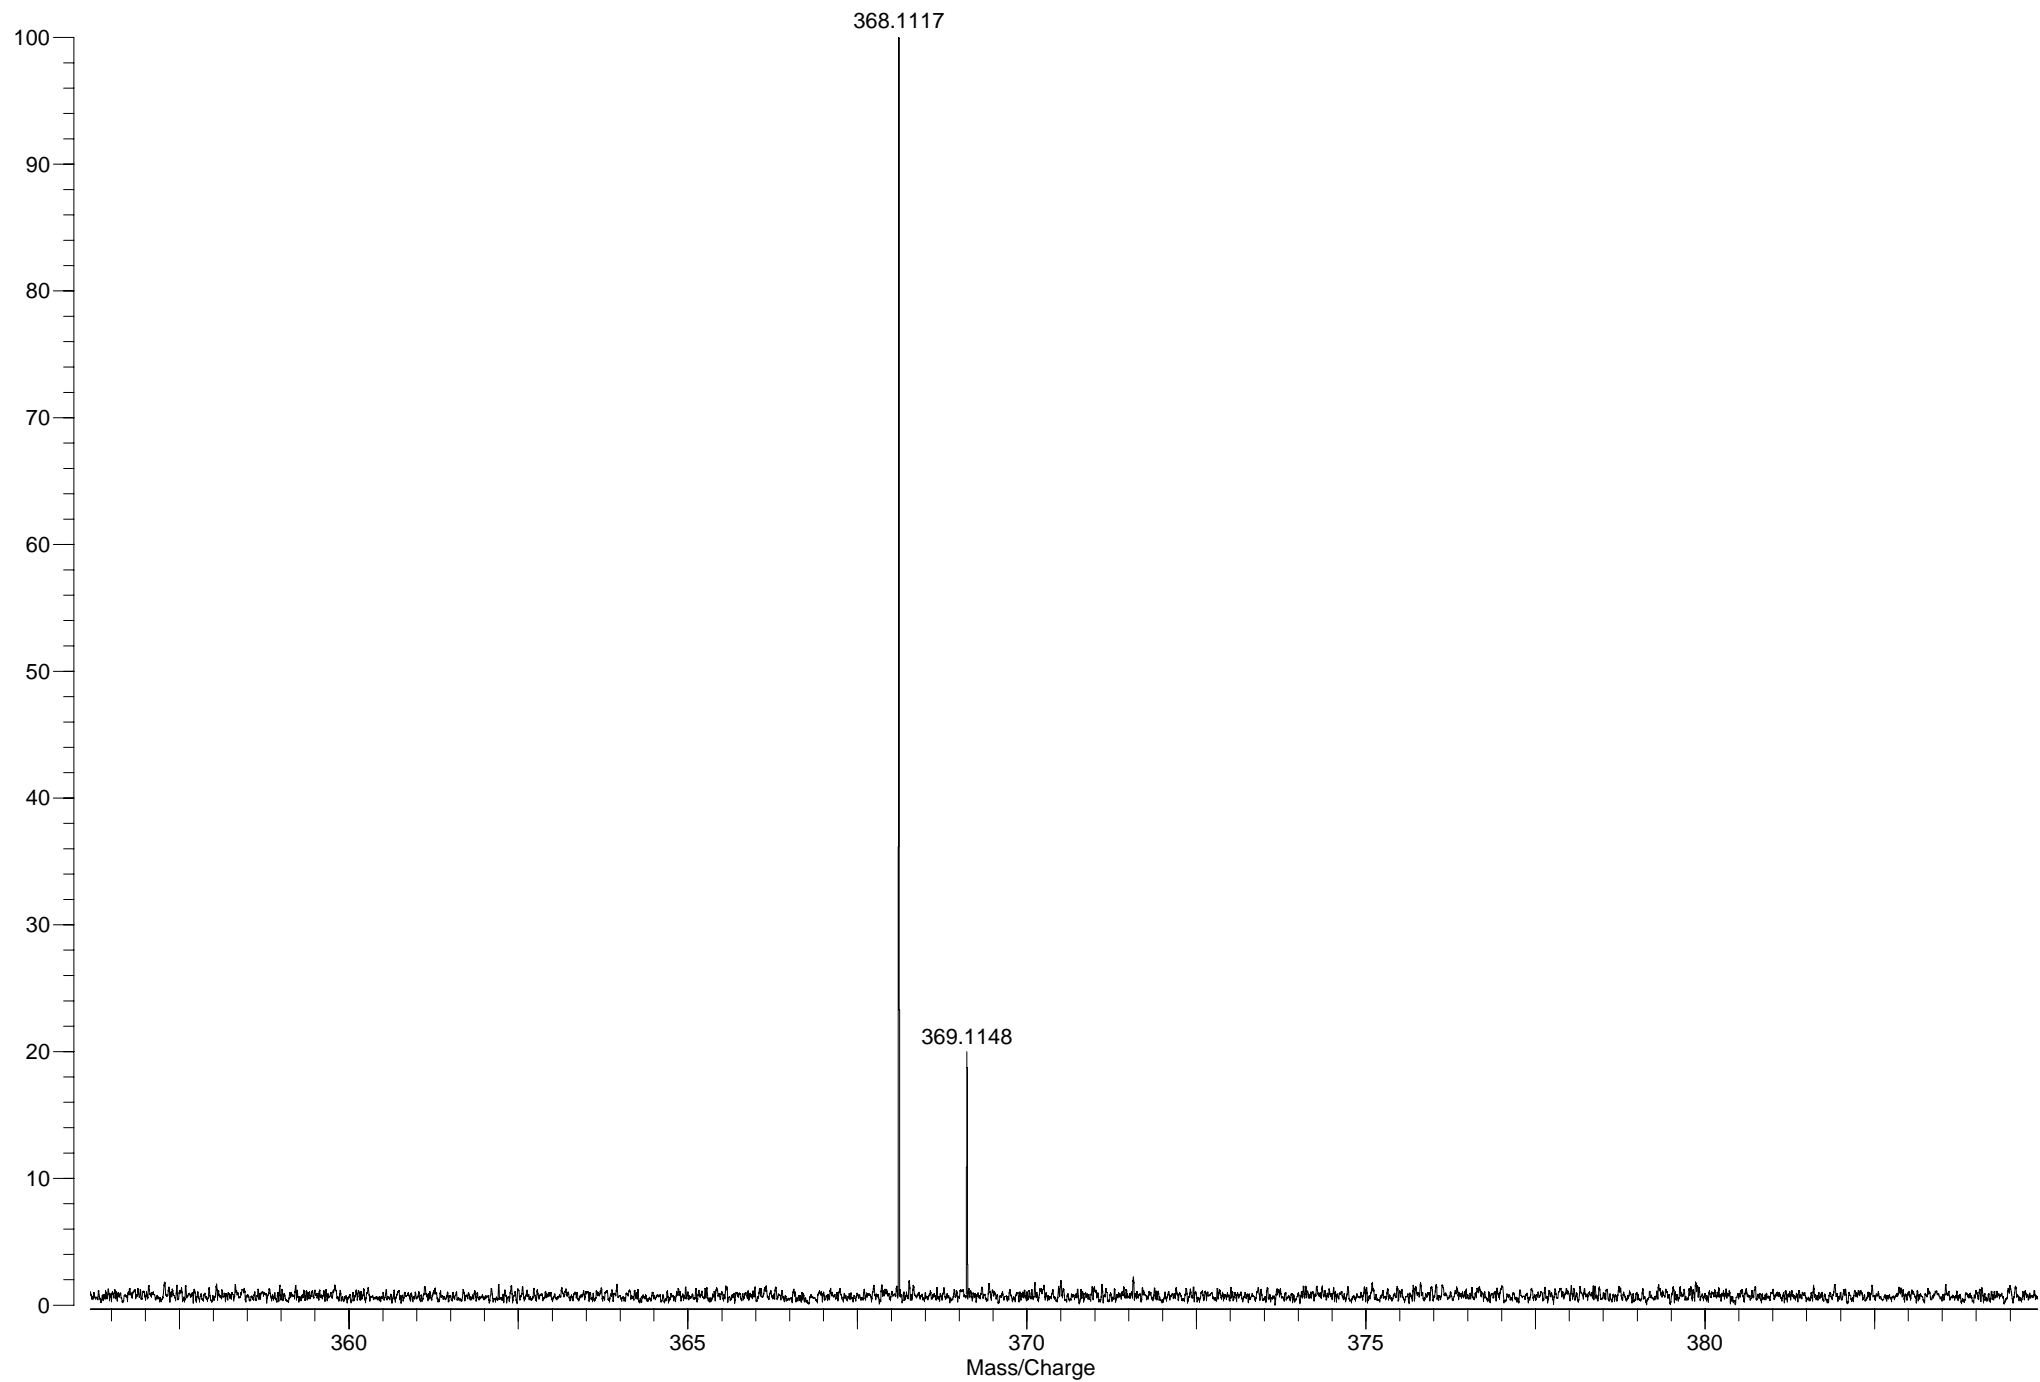

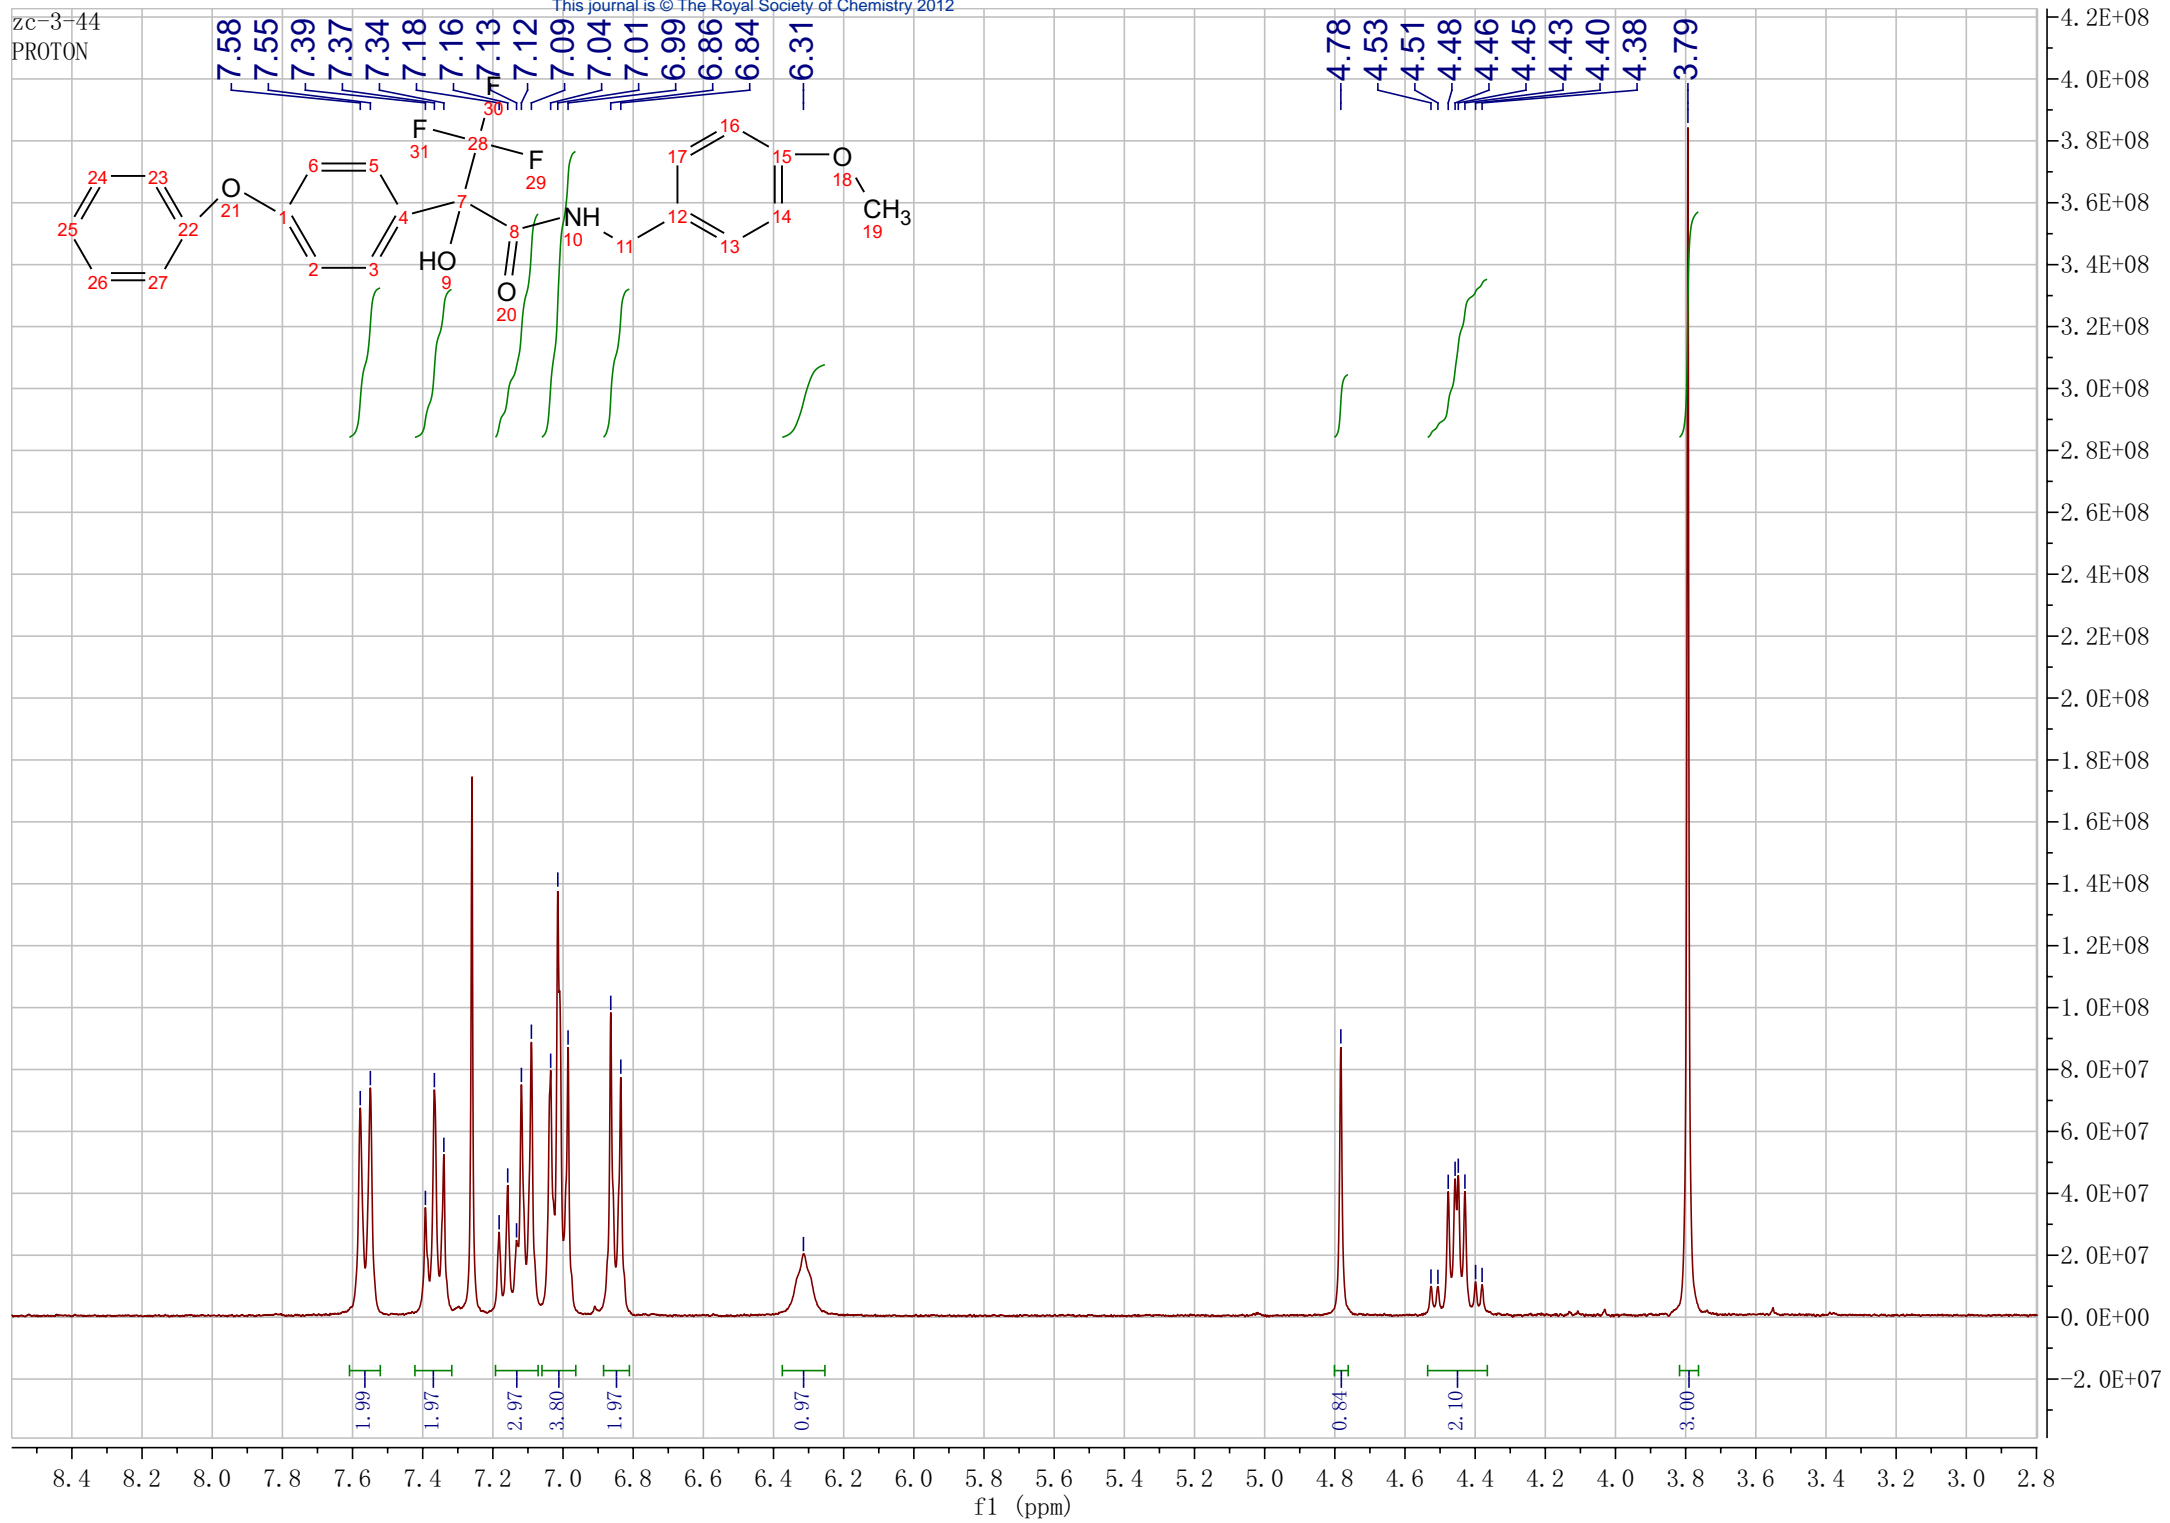

ZC-3-44-FC  
C13CPD

Electronic Supplementary Material (ESI) for Green Chemistry  
This journal is © The Royal Society of Chemistry 2012

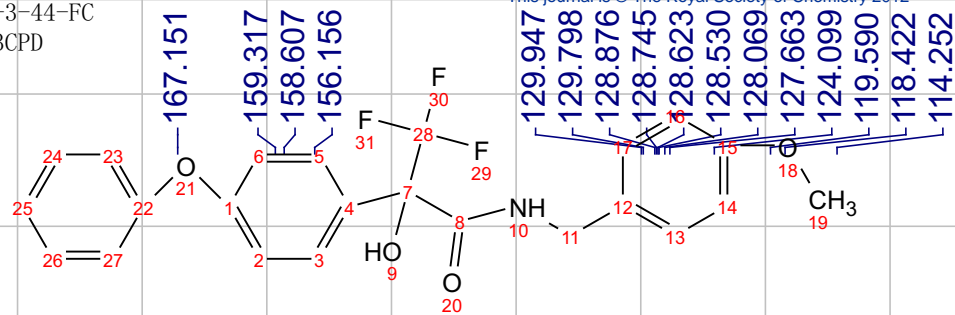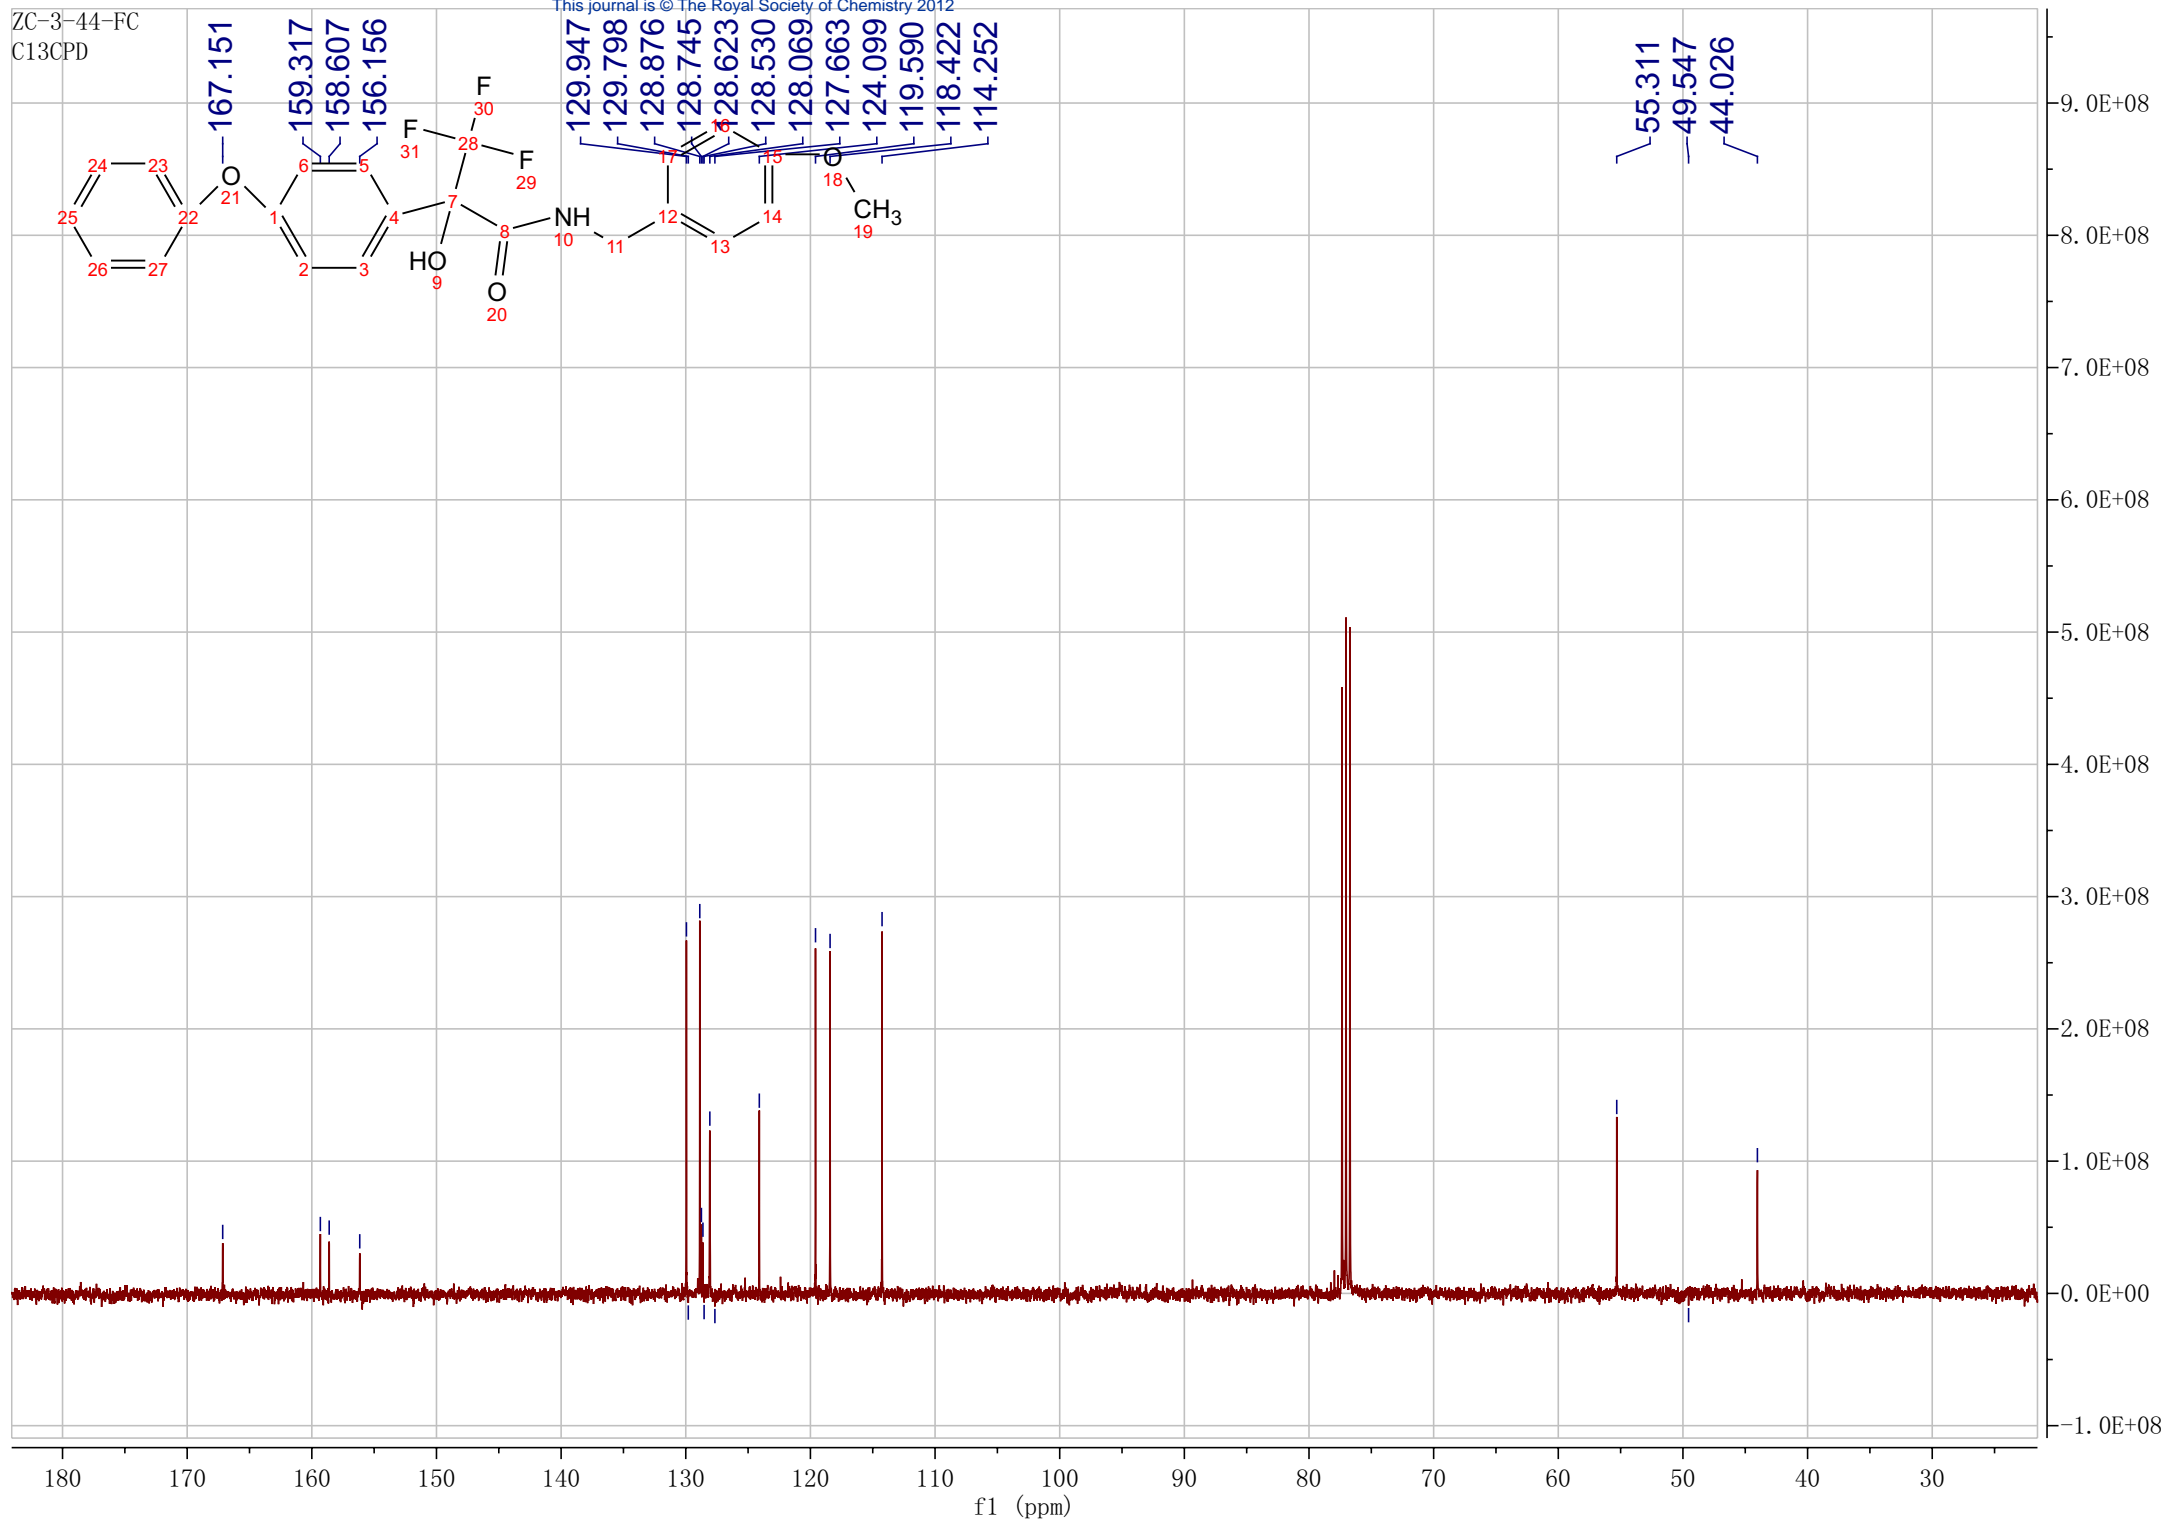

ZC-3-44-FC  
F19CPD

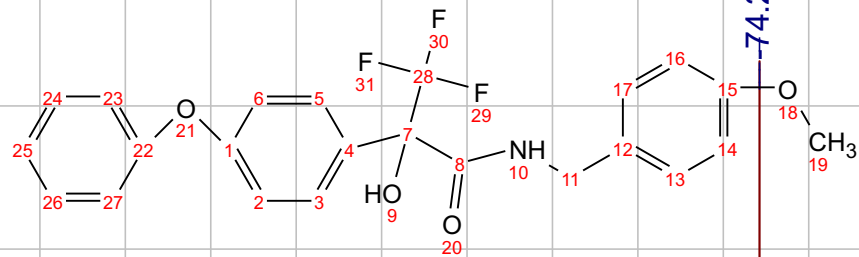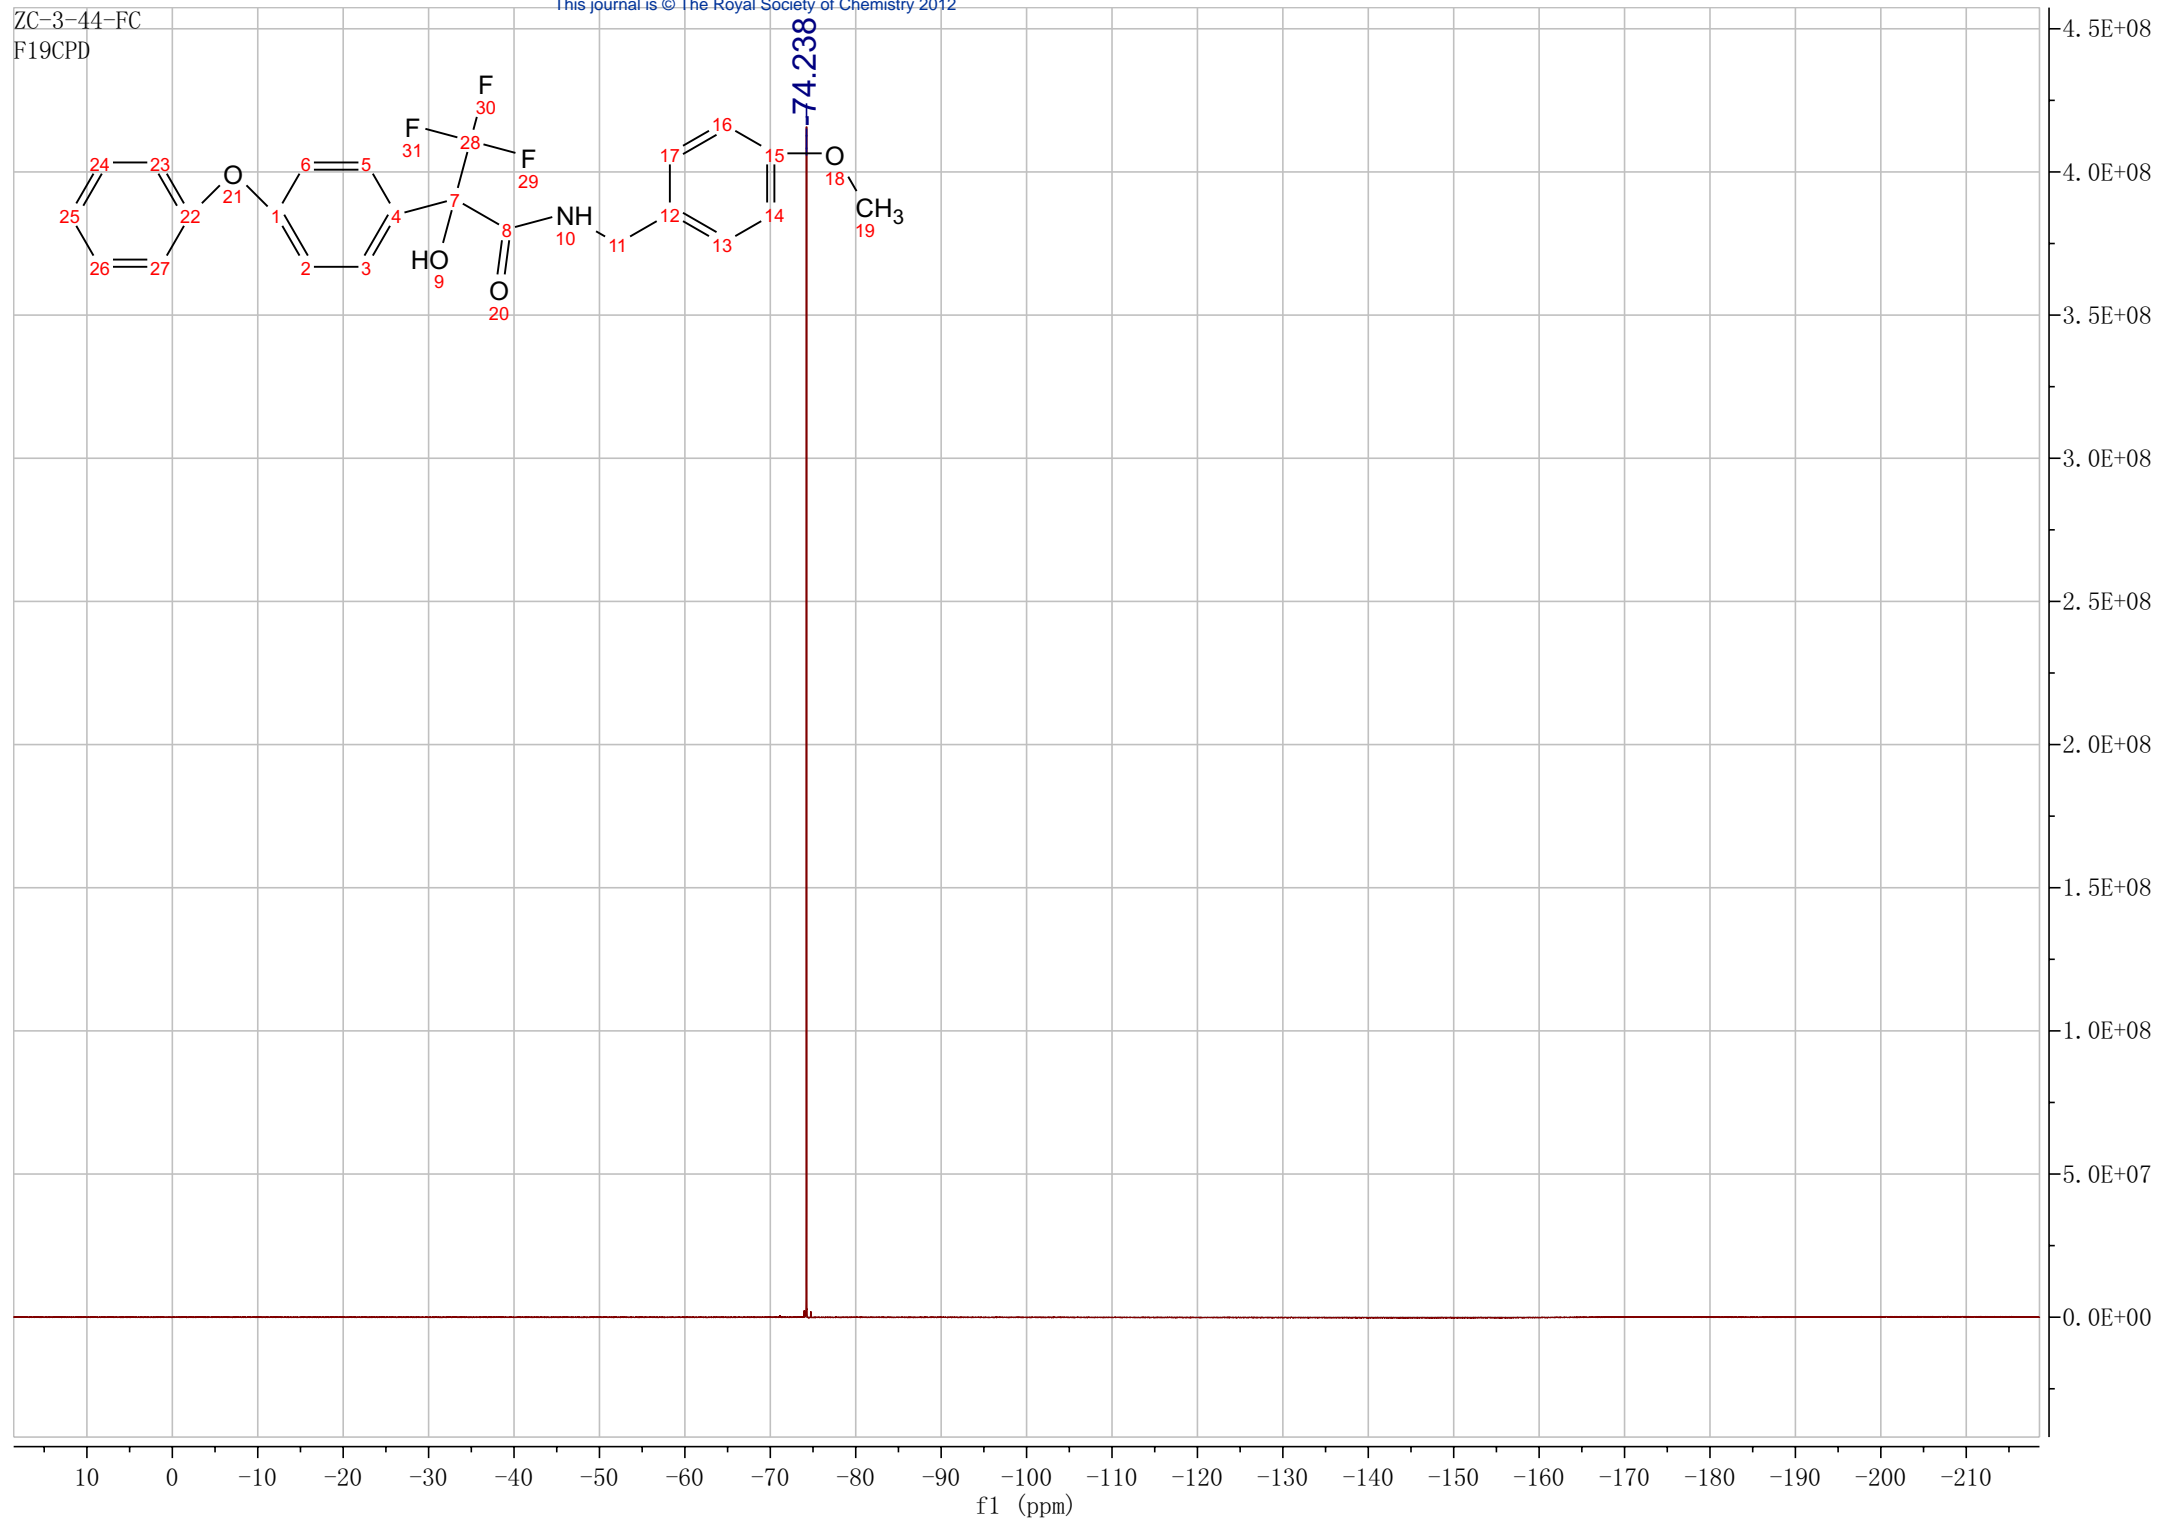

Varian ProMALDI  
File: Zc-3-44\_MALDI.trans

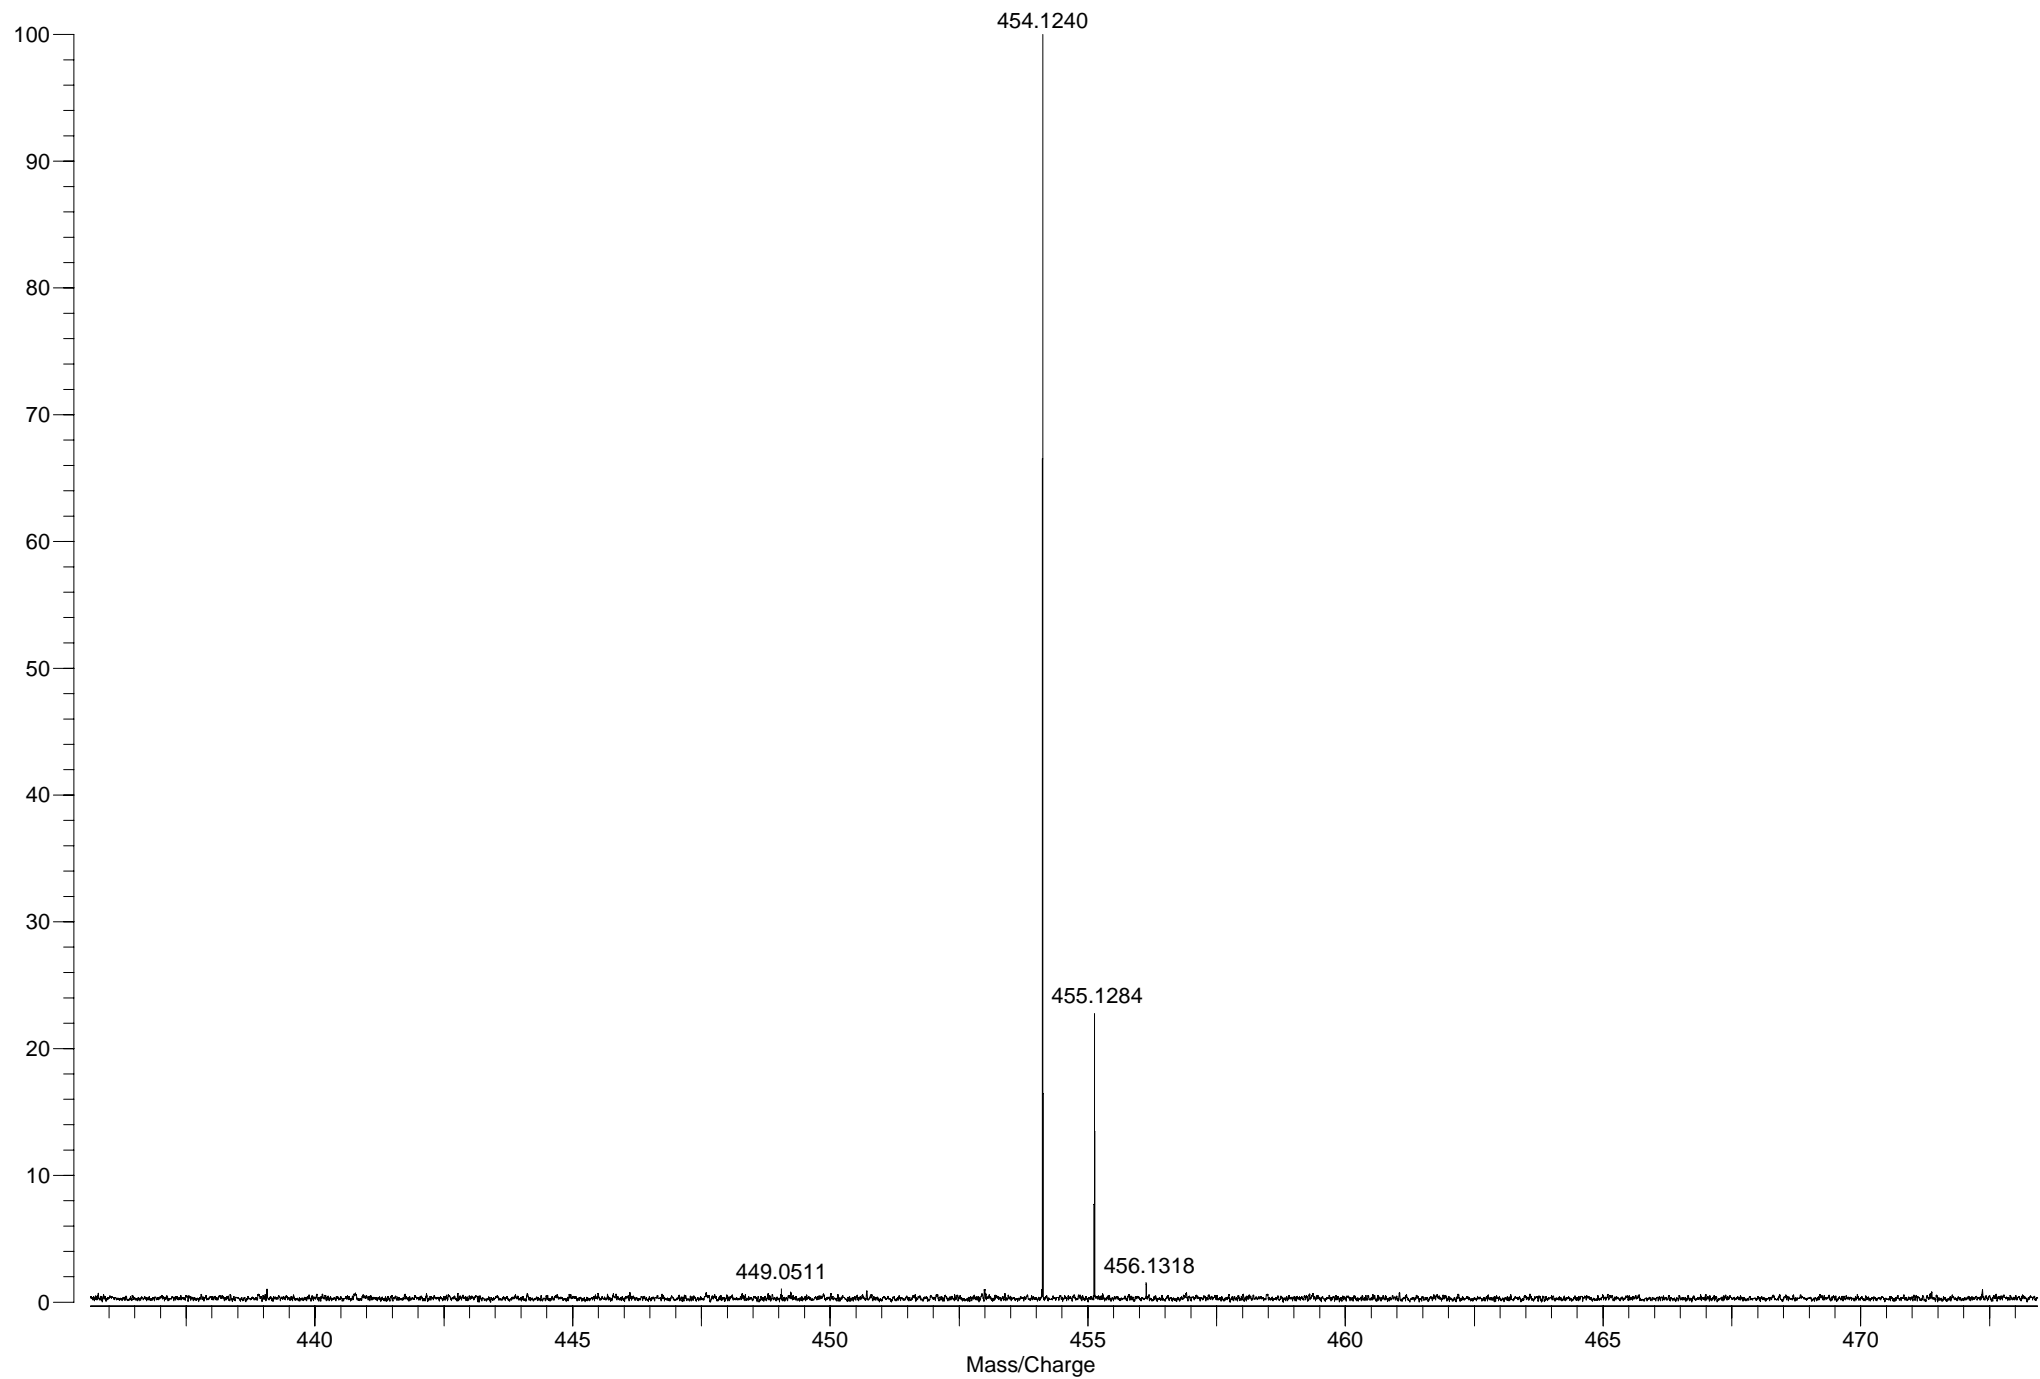

zc-3-35  
PROT

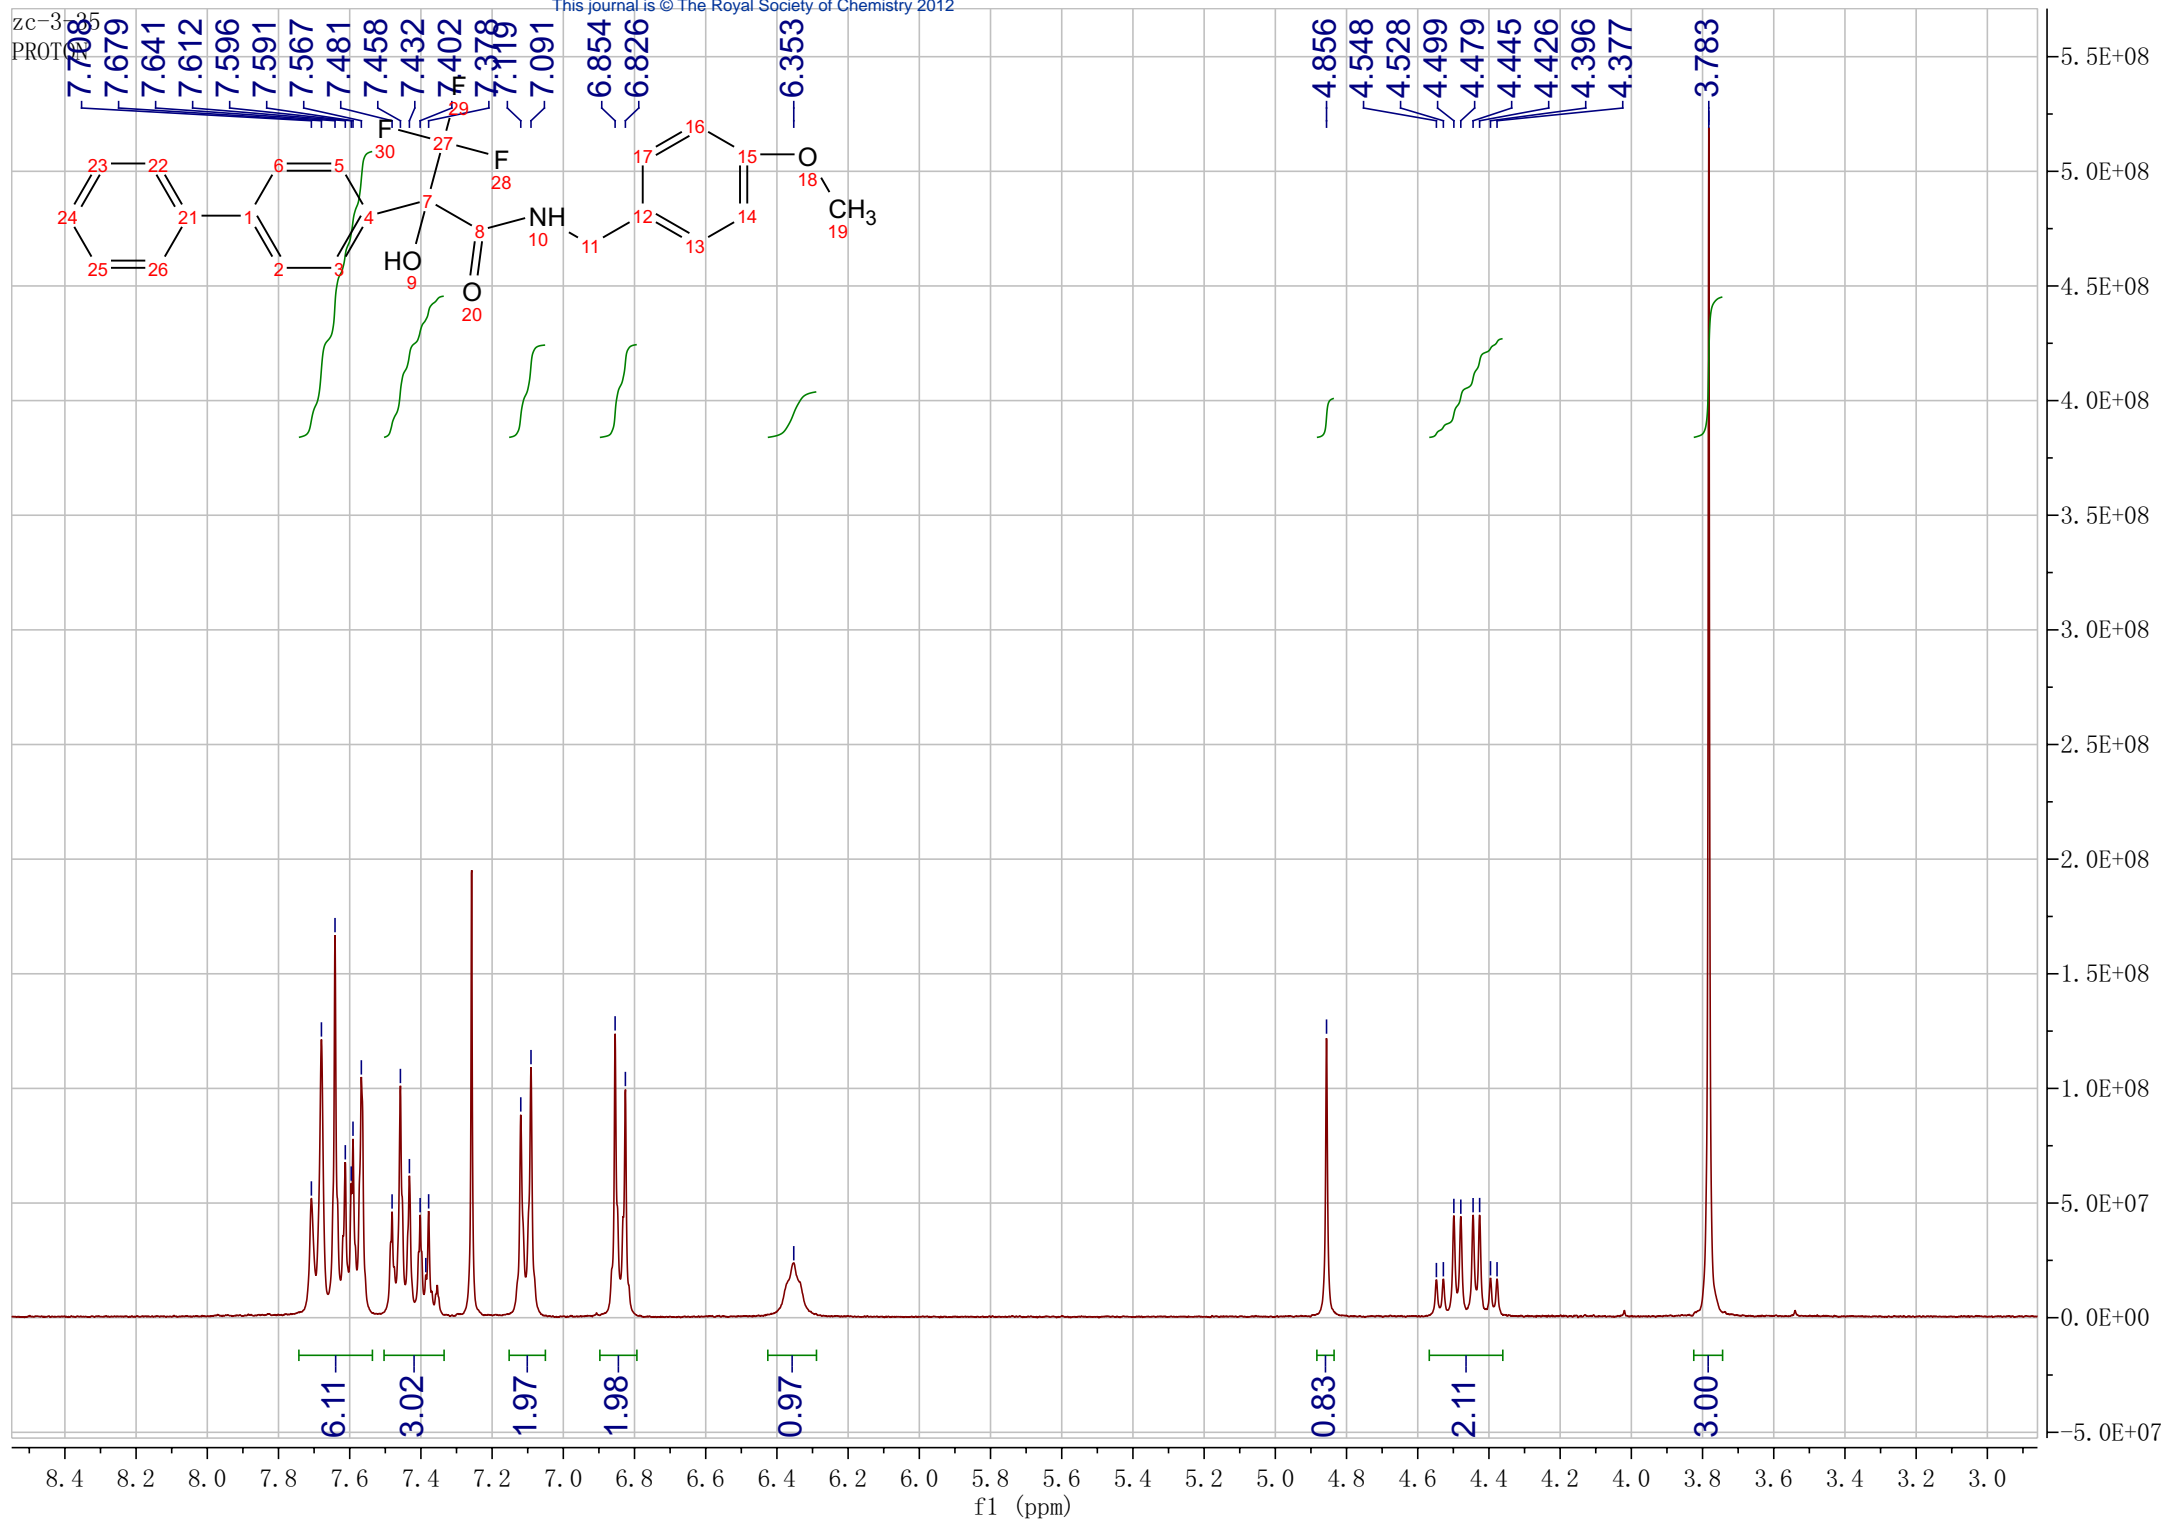



ZC-3-36-FC  
C13CPD

Electronic Supplementary Material (ESI) for Green Chemistry  
This journal is © The Royal Society of Chemistry 2012

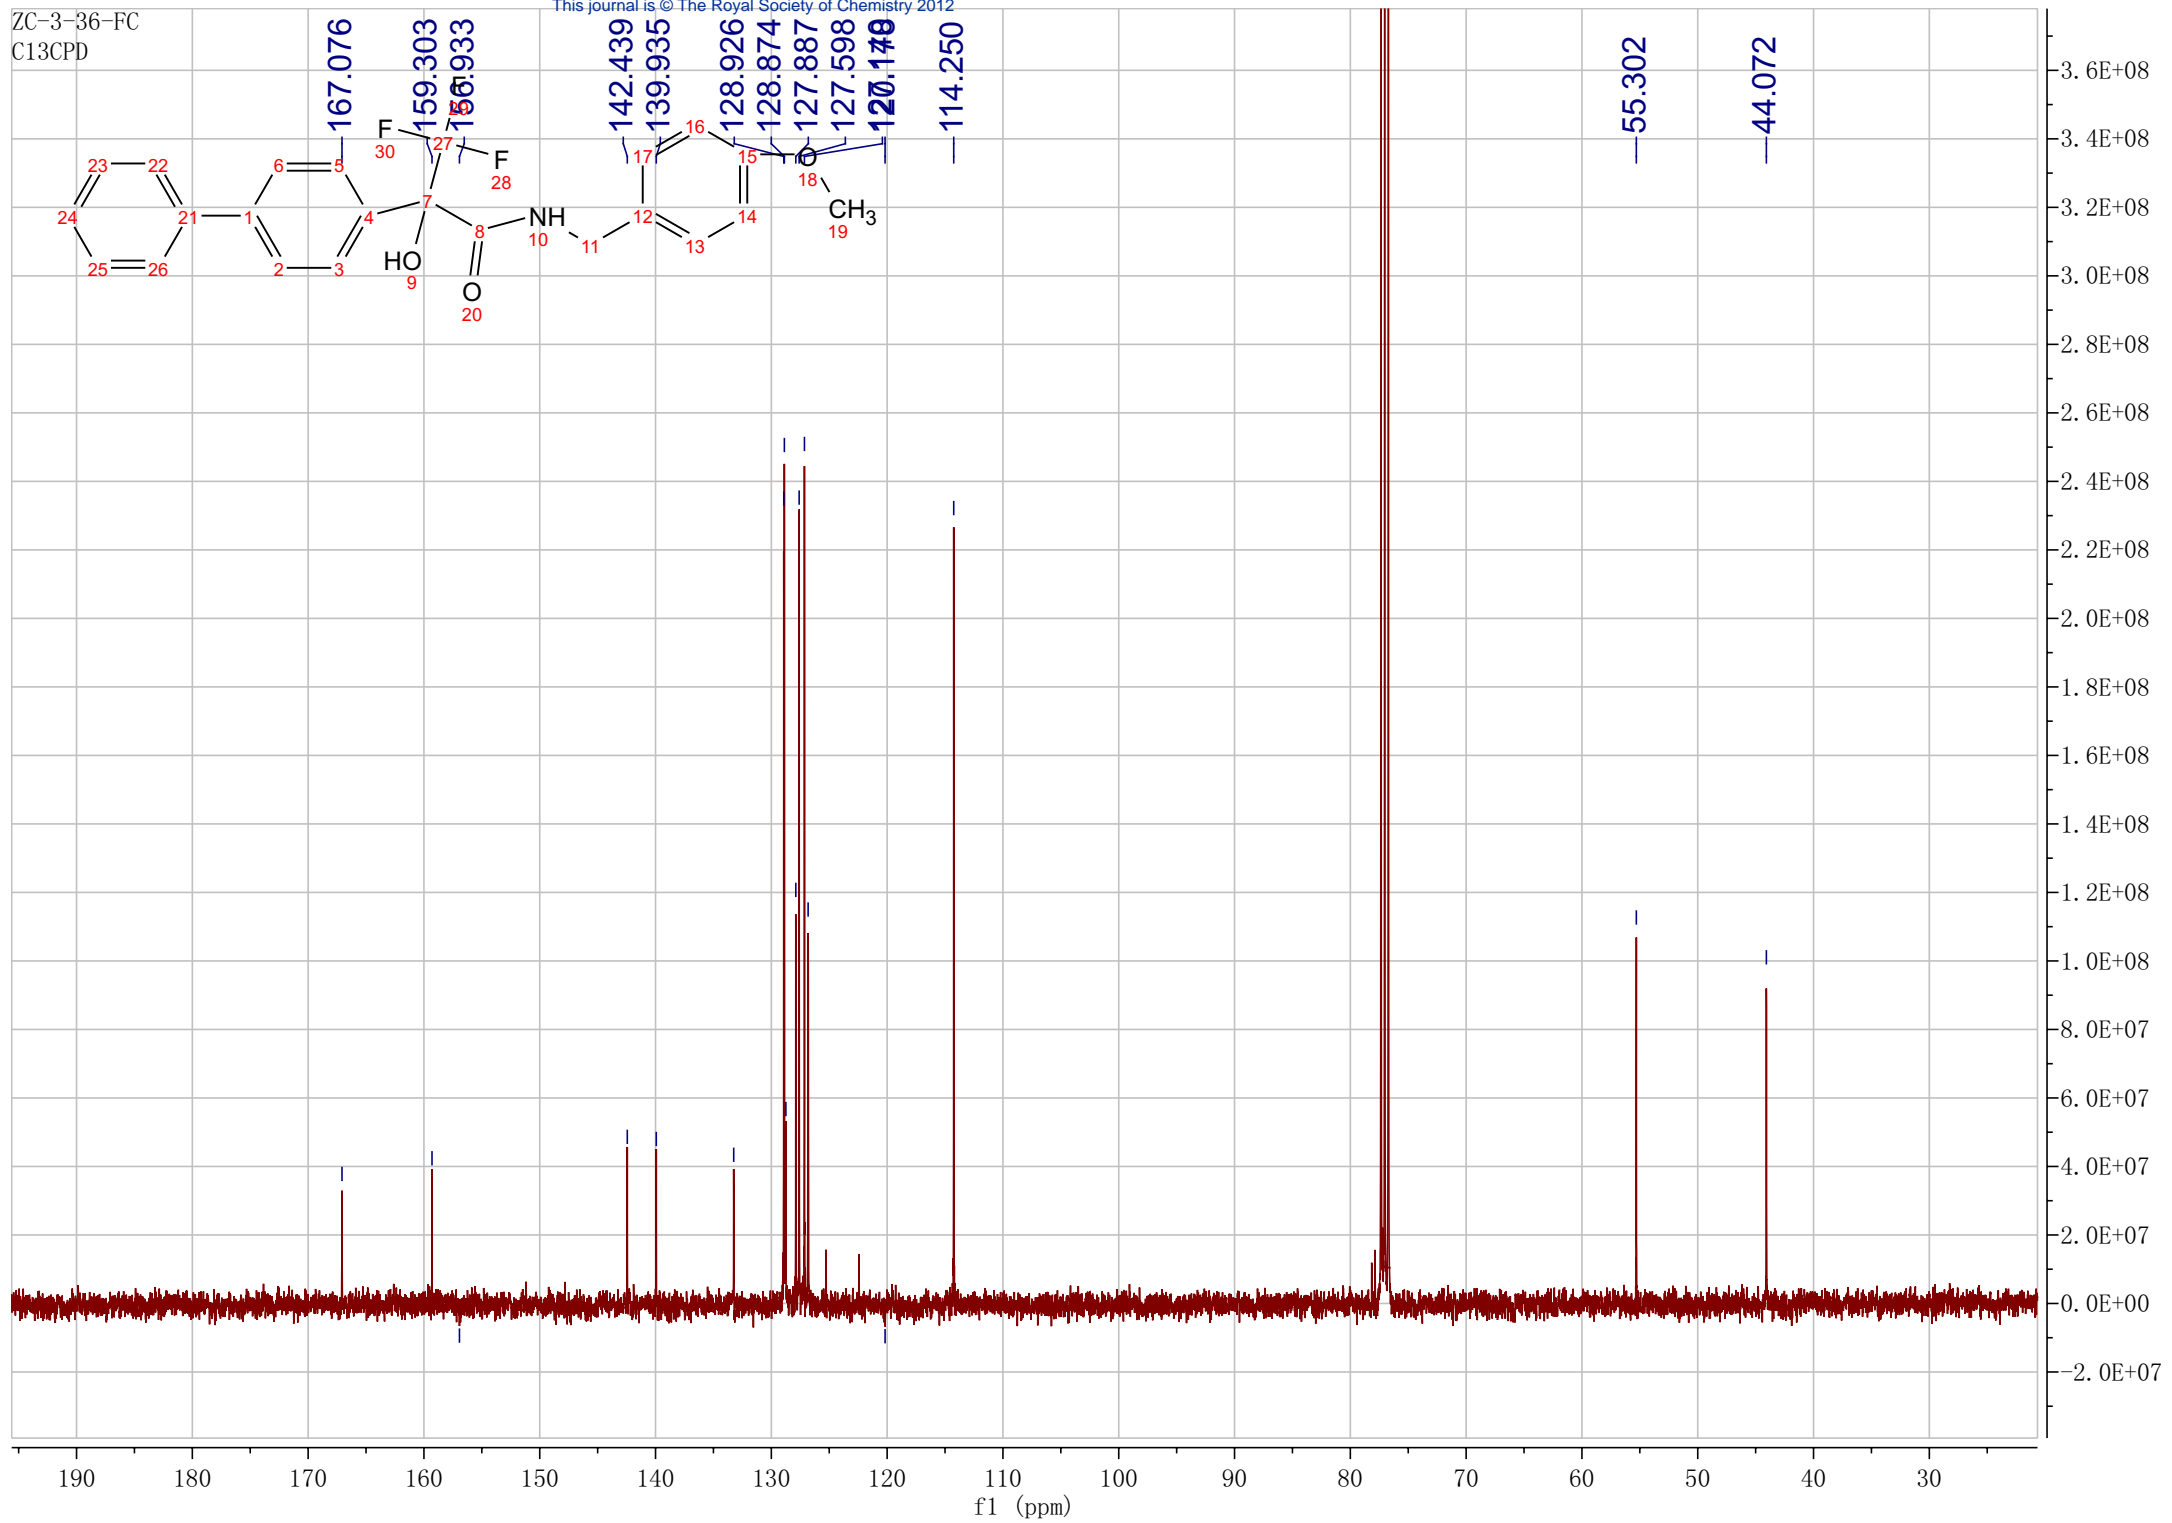

ZC-3-36-FC  
F19CPD

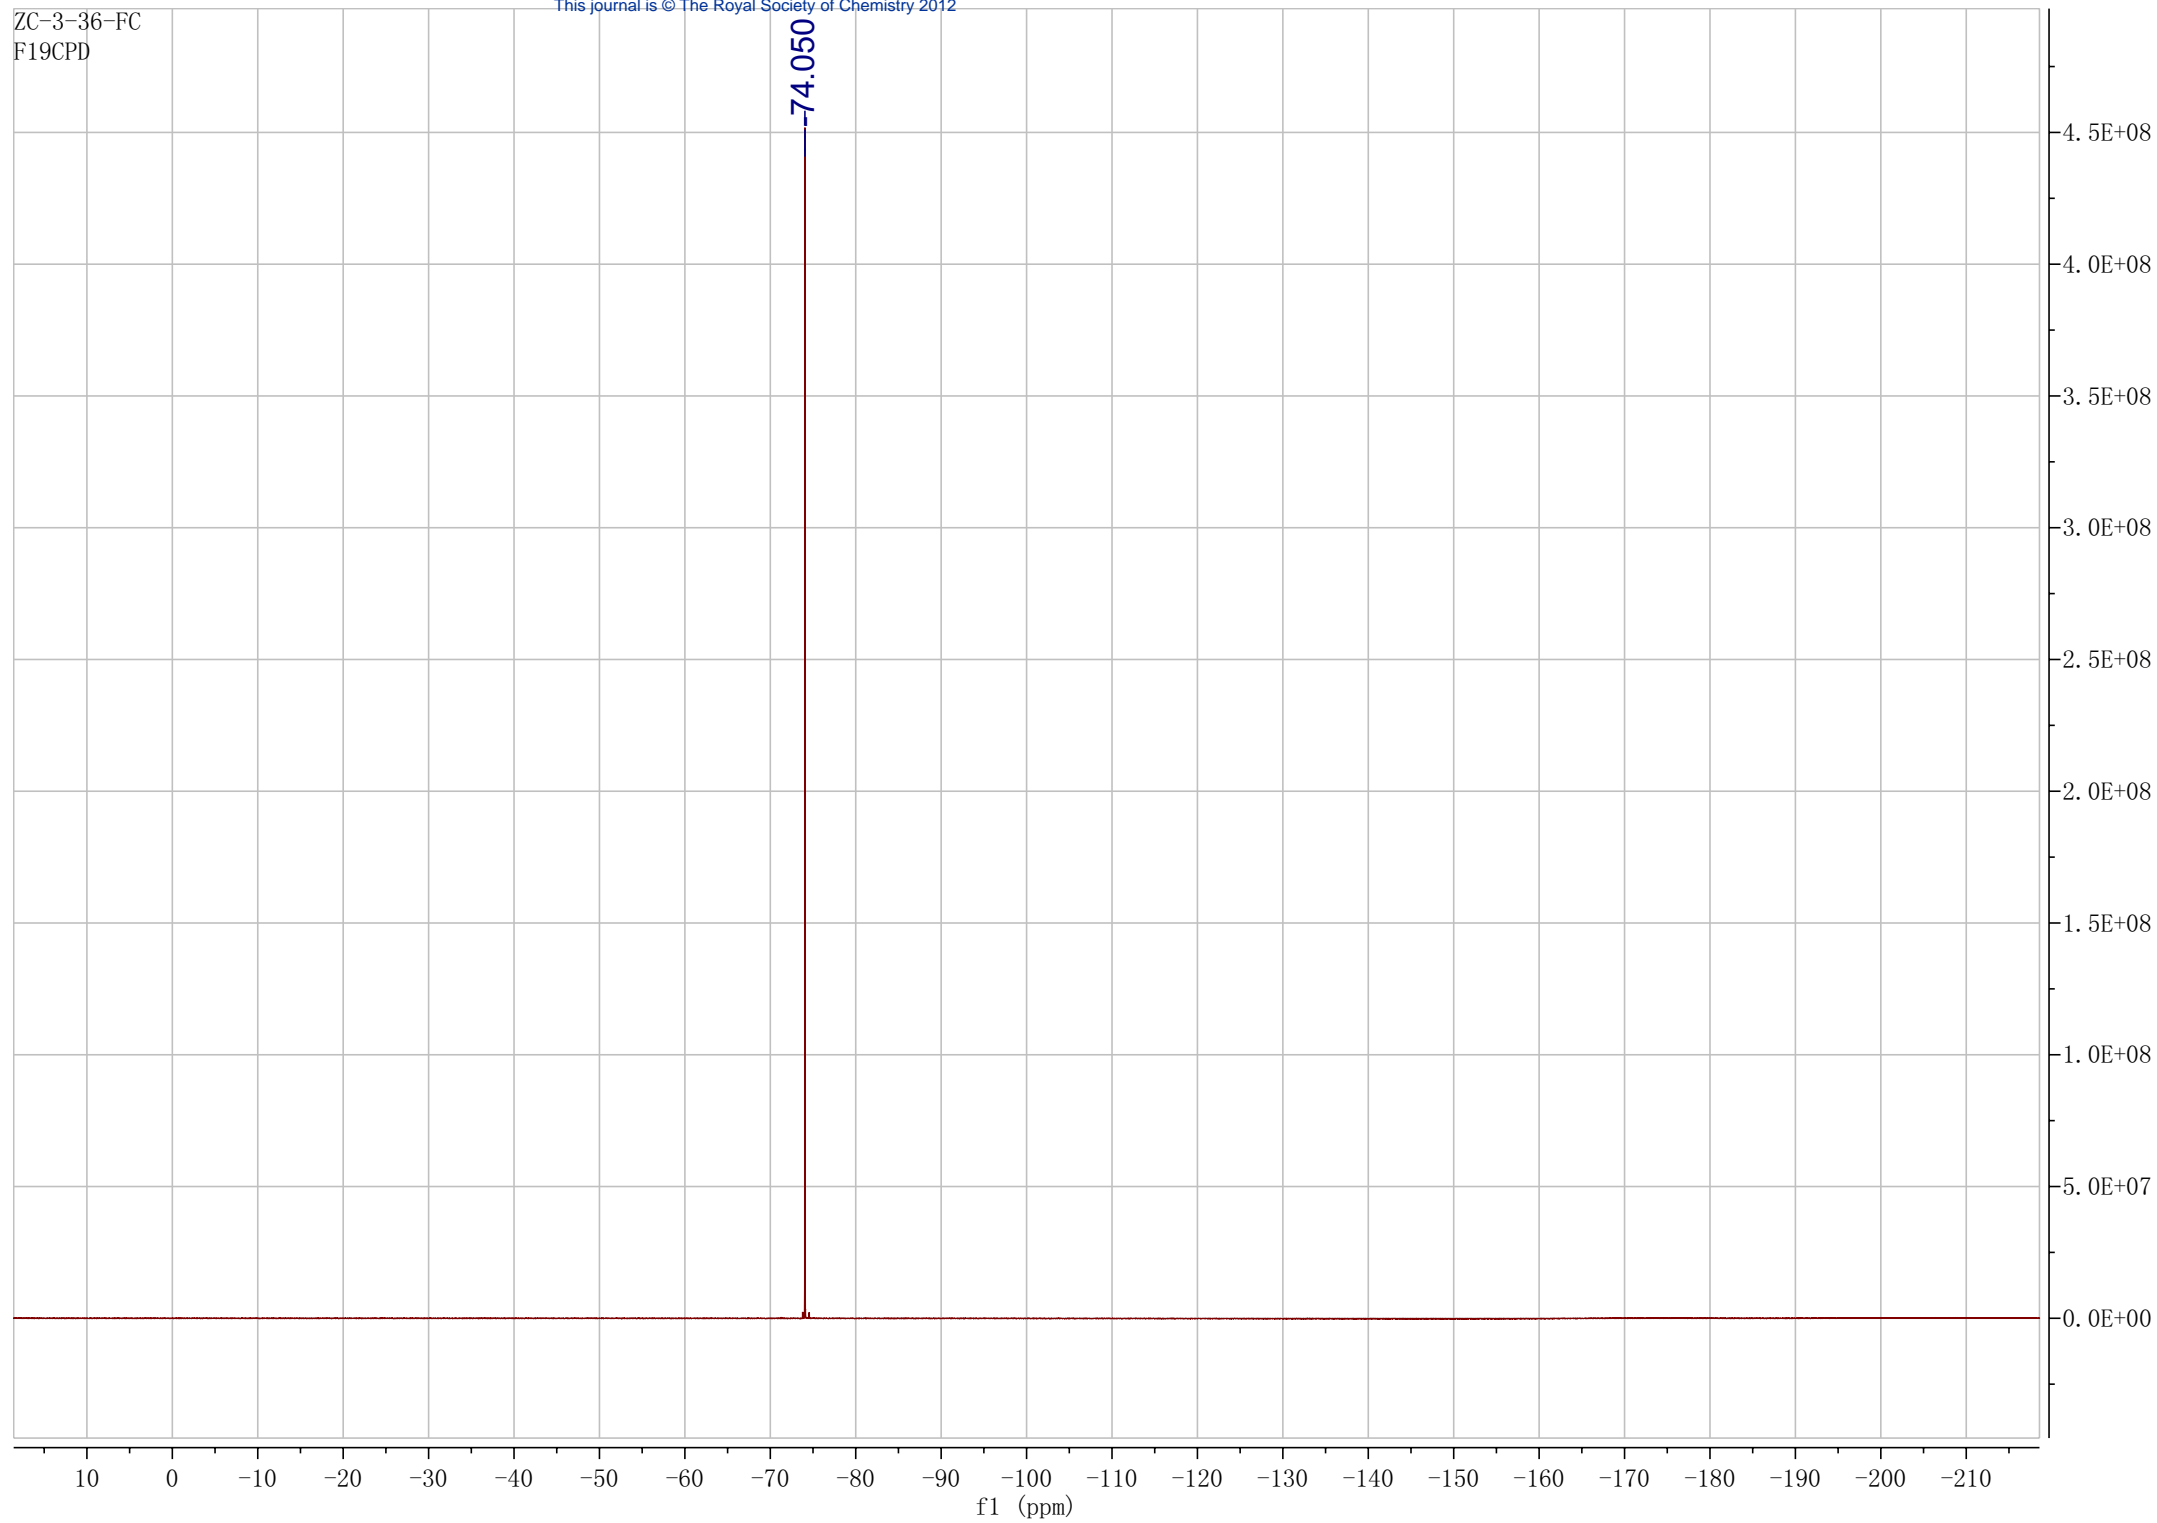

Varian ProMALDI  
File: Zc-3-36\_MALDI.trans

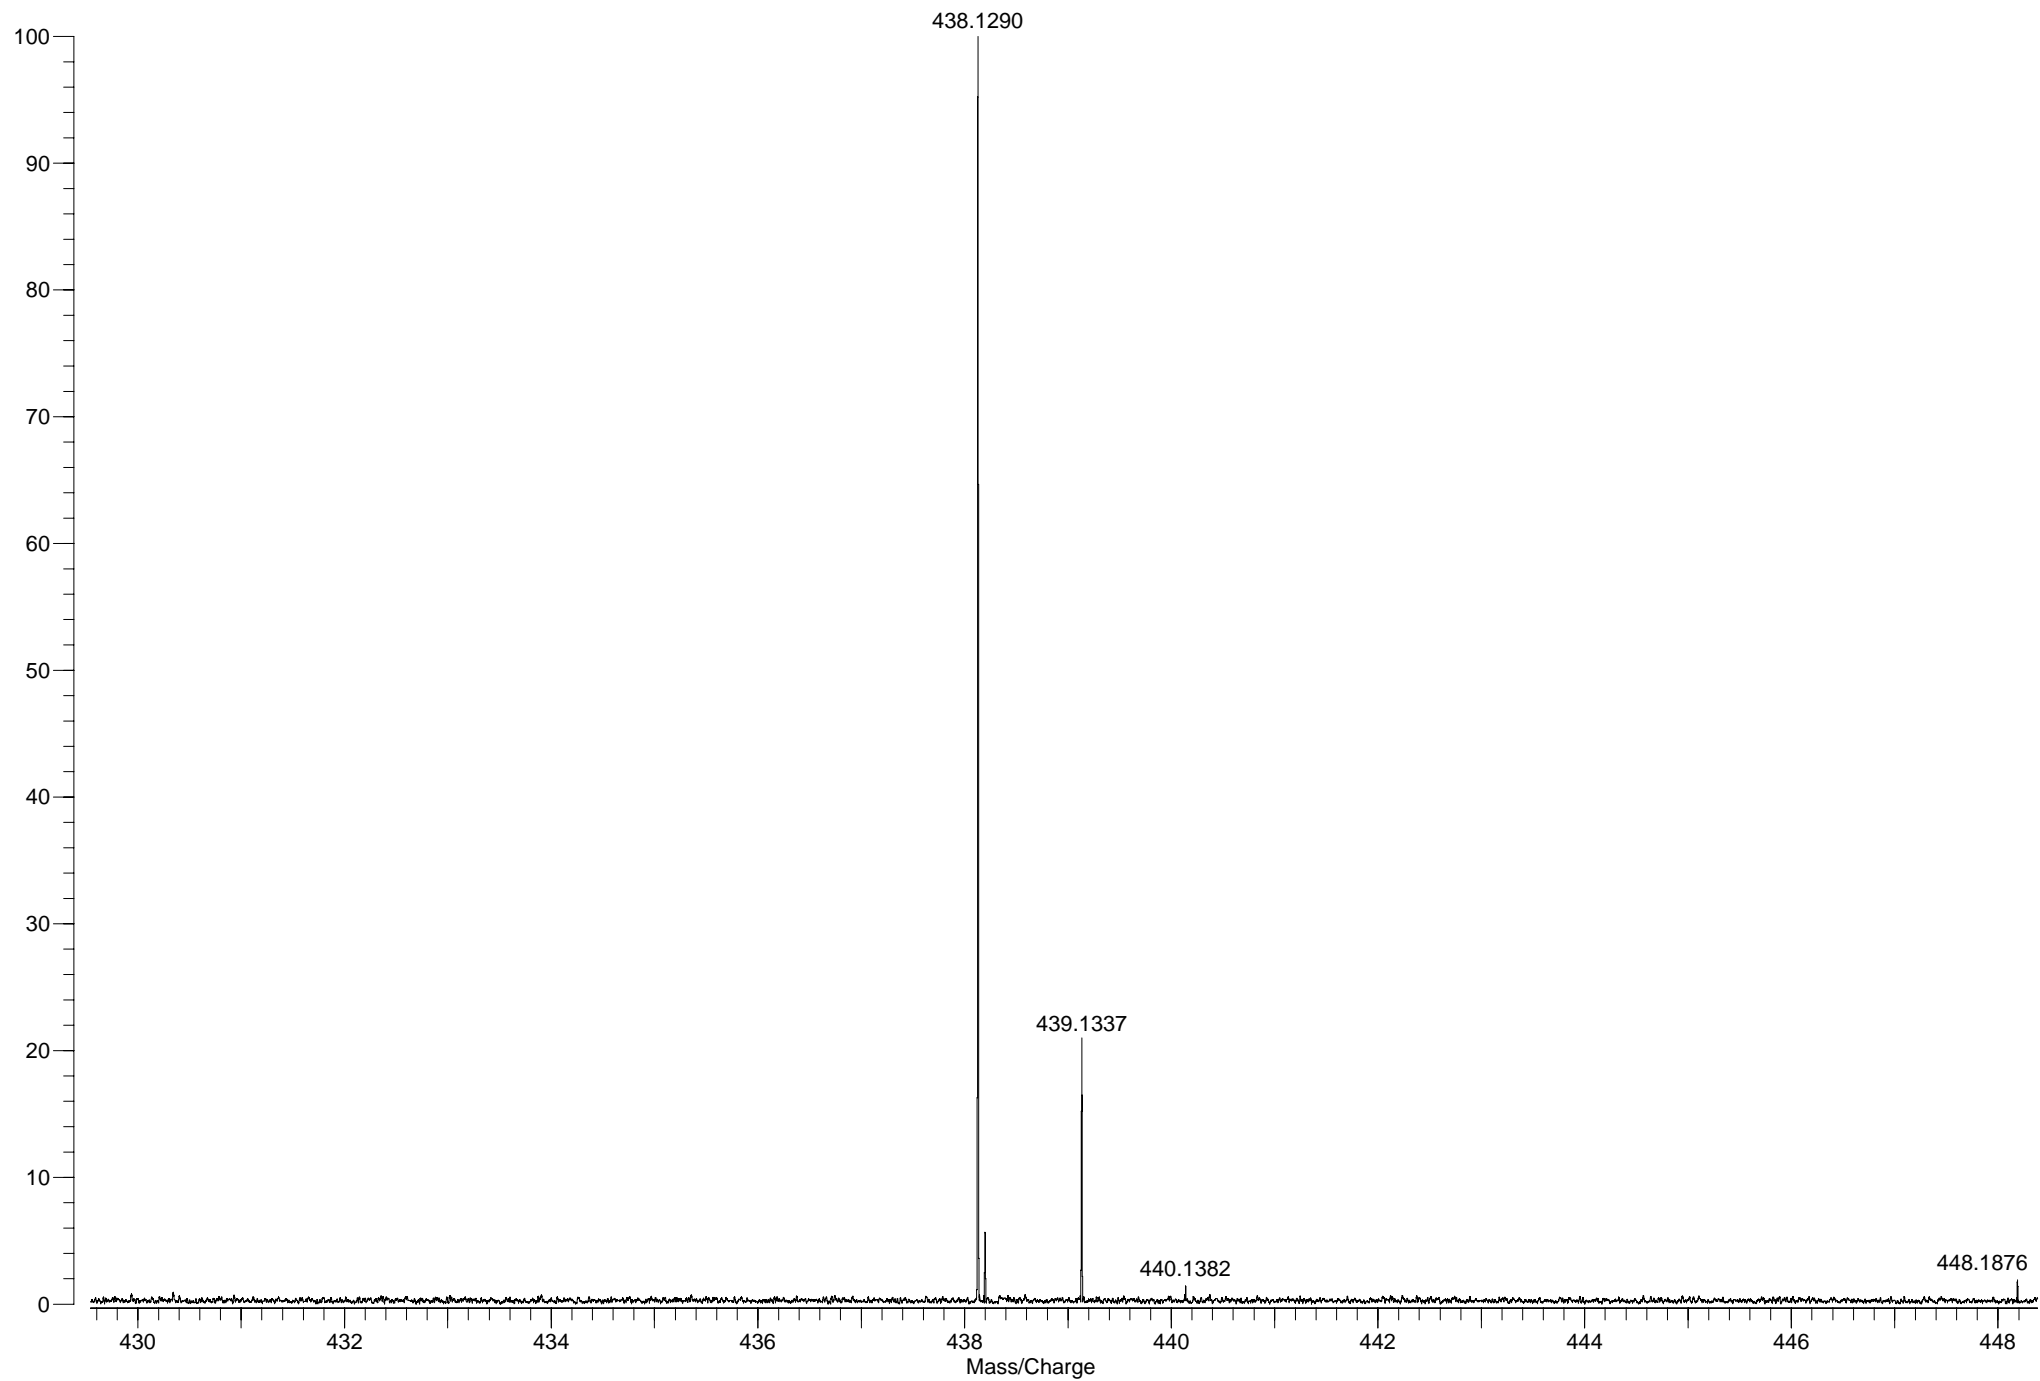

Supplement: c2gc36095k.pdf [file c2gc36095k.pdf]
